# Supplementary material
Source: PubMed Central journal article supplement (PMC7318065)

## Supporting information

### **Chemical synthesis and anti-inflammatory activity of bikunin associated chondroitin sulfate 24-mer**

Sherif Ramadan,<sup>1,2,3</sup> Tianlu Li,<sup>1,3</sup> Weizhun Yang,<sup>1,3</sup> Jicheng Zhang,<sup>1,3</sup> Zahra Rashidjahanabad,<sup>1,3</sup>  
Zibin Tan,<sup>1,3</sup> Narayanan Parameswaran,<sup>4</sup> Xuefei Huang<sup>1,3,5\*</sup>

<sup>1</sup>Department of Chemistry, Michigan State University, 578 South Shaw Lane, East Lansing, MI 48824, USA

<sup>2</sup>Chemistry Department, Faculty of Science, Benha University, Benha, Qaliobiya 13518, Egypt

<sup>3</sup>Institute for Quantitative Health Science and Engineering, Michigan State University, East Lansing, MI 48824, USA

<sup>4</sup>Department of Physiology, Michigan State University, East Lansing, MI 48824, USA

<sup>5</sup>Department of Biomedical Engineering, Michigan State University, East Lansing, MI 48824, USA

\*Email: [huangxu2@msu.edu](mailto:huangxu2@msu.edu)

**Contents:****Experimental procedures and characterization data.....S7****NMR spectra**

| <b>Compound No.</b> | <b>Spectra</b>                                         | <b>Page</b> |
|---------------------|--------------------------------------------------------|-------------|
| <b>S3</b>           | <sup>1</sup> H-NMR, <sup>13</sup> C-NMR, gCOSY, gHSQC, | <b>S68</b>  |
| <b>6</b>            | <sup>1</sup> H-NMR, <sup>13</sup> C-NMR, gCOSY, gHSQC, | <b>S70</b>  |
| <b>13</b>           | <sup>1</sup> H-NMR, <sup>13</sup> C-NMR, gCOSY, gHSQC, | <b>S72</b>  |
| <b>S7</b>           | <sup>1</sup> H-NMR, <sup>13</sup> C-NMR, gCOSY, gHSQC, | <b>S74</b>  |
| <b>S8</b>           | <sup>1</sup> H-NMR, <sup>13</sup> C-NMR, gCOSY, gHSQC, | <b>S76</b>  |
| <b>16</b>           | <sup>1</sup> H-NMR, <sup>13</sup> C-NMR, gCOSY         | <b>S78</b>  |
| <b>S9</b>           | <sup>1</sup> H-NMR, <sup>13</sup> C-NMR, gCOSY, gHSQC  | <b>S80</b>  |
| <b>S10</b>          | <sup>1</sup> H-NMR, <sup>13</sup> C-NMR, gCOSY         | <b>S82</b>  |
| <b>7</b>            | <sup>1</sup> H-NMR, <sup>13</sup> C-NMR, gCOSY, gHSQC  | <b>S84</b>  |
| <b>8</b>            | <sup>1</sup> H-NMR, <sup>13</sup> C-NMR, gCOSY, gHSQC  | <b>S86</b>  |
| <b>S14</b>          | <sup>1</sup> H-NMR, <sup>13</sup> C-NMR, gCOSY, gHSQC  | <b>S88</b>  |
| <b>23</b>           | <sup>1</sup> H-NMR, <sup>13</sup> C-NMR, gCOSY, gHSQC  | <b>S90</b>  |
| <b>11</b>           | <sup>1</sup> H-NMR, <sup>13</sup> C-NMR, gCOSY, gHSQC  | <b>S91</b>  |
| <b>14</b>           | <sup>1</sup> H-NMR, <sup>13</sup> C-NMR, gCOSY         | <b>S93</b>  |
| <b>S22</b>          | <sup>1</sup> H-NMR, <sup>13</sup> C-NMR, gCOSY, gHSQC  | <b>S95</b>  |
| <b>9</b>            | <sup>1</sup> H-NMR, <sup>13</sup> C-NMR, gCOSY, gHSQC  | <b>S97</b>  |
| <b>10</b>           | <sup>1</sup> H-NMR, <sup>13</sup> C-NMR, gHSQC         | <b>S99</b>  |
| <b>S23</b>          | <sup>1</sup> H-NMR, <sup>13</sup> C-NMR, gCOSY, gHSQC  | <b>S101</b> |
| <b>15</b>           | <sup>1</sup> H-NMR, <sup>13</sup> C-NMR, gCOSY, gHSQC  | <b>S103</b> |
| <b>17</b>           | <sup>1</sup> H-NMR, <sup>13</sup> C-NMR, gCOSY, gHSQC  | <b>S105</b> |

|            |                                                              |             |
|------------|--------------------------------------------------------------|-------------|
| <b>S24</b> | <sup>1</sup> H-NMR, <sup>13</sup> C-NMR, gCOSY,<br>gHSQC     | <b>S107</b> |
| <b>S25</b> | <sup>1</sup> H-NMR, <sup>13</sup> C-NMR, gCOSY,<br>gHSQC     | <b>S109</b> |
| <b>S26</b> | <sup>1</sup> H-NMR, <sup>13</sup> C-NMR, gCOSY,<br>gHSQC     | <b>S111</b> |
| <b>S27</b> | <sup>1</sup> H-NMR, <sup>13</sup> C-NMR, gCOSY,<br>gHSQC     | <b>S113</b> |
| <b>18</b>  | <sup>1</sup> H-NMR, <sup>13</sup> C-NMR, gCOSY,<br>gHSQC     | <b>S115</b> |
| <b>S29</b> | <sup>1</sup> H-NMR, <sup>13</sup> C-NMR, <sup>19</sup> F-NMR | <b>S117</b> |
| <b>20</b>  | <sup>1</sup> H-NMR, <sup>13</sup> C-NMR, gCOSY,<br>gHSQC     | <b>S119</b> |
| <b>S30</b> | <sup>1</sup> H-NMR                                           | <b>S121</b> |
| <b>18</b>  | <sup>1</sup> H-NMR, <sup>13</sup> C-NMR, gCOSY               | <b>S122</b> |
| <b>19</b>  | <sup>1</sup> H-NMR, <sup>13</sup> C-NMR, gCOSY,<br>gHSQC     | <b>S124</b> |
| <b>22</b>  | <sup>1</sup> H-NMR, gHSQC                                    | <b>S126</b> |
| <b>S31</b> | <sup>1</sup> H-NMR, <sup>13</sup> C-NMR, gCOSY               | <b>S127</b> |
| <b>21</b>  | <sup>1</sup> H-NMR, <sup>13</sup> C-NMR, gCOSY,<br>gHSQC     | <b>S129</b> |
| <b>25</b>  | <sup>1</sup> H-NMR, <sup>13</sup> C-NMR, gCOSY,<br>gHSQC     | <b>S131</b> |
| <b>27</b>  | <sup>1</sup> H-NMR, <sup>13</sup> C-NMR, gCOSY,<br>gHSQC     | <b>S133</b> |
| <b>26</b>  | <sup>1</sup> H-NMR, <sup>13</sup> C-NMR, gCOSY,<br>gHSQC     | <b>S135</b> |
| <b>28</b>  | <sup>1</sup> H-NMR, <sup>13</sup> C-NMR, gCOSY,<br>gHSQC     | <b>S137</b> |
| <b>29</b>  | <sup>1</sup> H-NMR, <sup>13</sup> C-NMR, gCOSY               | <b>S139</b> |
| <b>30</b>  | <sup>1</sup> H-NMR, <sup>13</sup> C-NMR, gCOSY,<br>gHSQC     | <b>S141</b> |
| <b>31</b>  | <sup>1</sup> H-NMR, <sup>13</sup> C-NMR, gCOSY,<br>gHSQC     | <b>S143</b> |
| <b>32</b>  | <sup>1</sup> H-NMR, <sup>13</sup> C-NMR, gCOSY,<br>gHSQC     | <b>S145</b> |
| <b>33</b>  | <sup>1</sup> H-NMR, <sup>13</sup> C-NMR, gCOSY               | <b>S147</b> |
| <b>34</b>  | <sup>1</sup> H-NMR, <sup>13</sup> C-NMR, gCOSY,<br>gHSQC     | <b>S149</b> |
| <b>35</b>  | <sup>1</sup> H-NMR, <sup>13</sup> C-NMR, gCOSY,<br>gHSQC     | <b>S151</b> |

|                   |                                                                     |             |
|-------------------|---------------------------------------------------------------------|-------------|
| <b>36</b>         | <sup>1</sup> H-NMR, <sup>13</sup> C-NMR, gCOSY,<br>gHSQC            | <b>S153</b> |
| <b>37</b>         | <sup>1</sup> H-NMR, <sup>13</sup> C-NMR, gCOSY,<br>gHSQC            | <b>S155</b> |
| <b>38</b>         | <sup>1</sup> H-NMR, <sup>13</sup> C-NMR, gCOSY,<br>gHSQC            | <b>S157</b> |
| <b>39</b>         | <sup>1</sup> H-NMR, <sup>13</sup> C-NMR, gCOSY,<br>gHSQC            | <b>S159</b> |
| <b>40</b>         | <sup>1</sup> H-NMR, <sup>13</sup> C-NMR, gCOSY,<br>gHSQC            | <b>S161</b> |
| <b>41</b>         | <sup>1</sup> H-NMR, <sup>13</sup> C-NMR, gCOSY,<br>gHSQC            | <b>S163</b> |
| <b>42</b>         | <sup>1</sup> H-NMR, <sup>13</sup> C-NMR, gCOSY,<br>gHSQC            | <b>S165</b> |
| <b>43</b>         | <sup>1</sup> H-NMR, <sup>13</sup> C-NMR, gCOSY,<br>gHSQC            | <b>S167</b> |
| <b>44</b>         | <sup>1</sup> H-NMR, <sup>13</sup> C-NMR, gCOSY,<br>gHSQC            | <b>S169</b> |
| <b>45</b>         | <sup>1</sup> H-NMR, <sup>13</sup> C-NMR, gCOSY,<br>gHSQC            | <b>S171</b> |
| <b>46</b>         | <sup>1</sup> H-NMR, <sup>13</sup> C-NMR, gCOSY                      | <b>S173</b> |
| <b>47</b>         | <sup>1</sup> H-NMR, <sup>13</sup> C-NMR, gCOSY,<br>gHSQC            | <b>S175</b> |
| <b>48</b>         | <sup>1</sup> H-NMR, <sup>13</sup> C-NMR, gCOSY,<br>gHSQC            | <b>S177</b> |
| <b>49</b>         | <sup>1</sup> H-NMR, <sup>13</sup> C-NMR, gCOSY,<br>gHSQC            | <b>S179</b> |
| <b>50</b>         | <sup>1</sup> H-NMR, <sup>13</sup> C-NMR, gCOSY,<br>gHSQC, MALDI-TOF | <b>S181</b> |
| <b>51</b>         | <sup>1</sup> H-NMR, <sup>13</sup> C-NMR, gCOSY,<br>gHSQC            | <b>S184</b> |
| <b>52</b>         | <sup>1</sup> H-NMR, <sup>13</sup> C-NMR, gCOSY,<br>ESI-MS           | <b>S186</b> |
| <b>53</b>         | ESI-MS                                                              | <b>S190</b> |
| <b>1</b>          | <sup>1</sup> H-NMR, <sup>13</sup> C-NMR, gCOSY,<br>gHSQC,           | <b>S191</b> |
| <b>Bikunin CS</b> | <sup>1</sup> H-NMR, ESI-MS                                          | <b>S192</b> |

**List of abbreviation:**

| <b>Name</b>                                               | <b>Abbreviation</b> |
|-----------------------------------------------------------|---------------------|
| Acetic acid                                               | AcOH                |
| Acetic anhydride                                          | Ac <sub>2</sub> O   |
| Acetyl chloride                                           | AcCl                |
| <i>tert</i> -Butyldimethylsilyl chloride                  | TBSCl               |
| <i>tert</i> -Butyldimethylsilyl trifluoromethanesulfonate | TBSOTf              |
| Camphorsulfonic acid                                      | CSA                 |
| 1,8-Diazabicyclo[5.4.0]undec-7-ene                        | DBU                 |
| Dichloromethane                                           | DCM                 |
| 2,5-Dihydroxy-benzoic acid                                | DHB                 |
| <i>N,N'</i> -Diisopropylcarbodiimide                      | DIC                 |
| Dynamic light scattering                                  | DLS                 |
| 4-Dimethylaminopyridine                                   | DMAP                |
| Dimethylsulfoxide                                         | DMSO                |
| Equivalent                                                | Equiv.              |
| Ethyl acetate                                             | EtOAc               |
| Fluorescence activated cell sorting                       | FACS                |
| Fluorescein isothiocyanate                                | FITC                |
| <i>N</i> -Iodosuccinimide                                 | NIS                 |
| Levulinic acid                                            | LevOH               |
| <i>p</i> -Methoxyphenyl                                   | PMP                 |
| Molecular sieve                                           | MS                  |
| 2-Picolinic acid                                          | PicoOH              |
| Pyridine                                                  | Py.                 |
| Enzyme-linked immunosorbent assay                         | ELISA               |
| Thin layer chromatography                                 | TLC                 |
| Trichloroacetyl                                           | TCA                 |

|                                         |                   |
|-----------------------------------------|-------------------|
| <b>Triethylamine</b>                    | Et <sub>3</sub> N |
| <b>Trifluoroacetyl</b>                  | TFA               |
| <b>Trifluoromethanesulfonic acid</b>    | TfOH              |
| <b>2,4,6-Tri-ter-butylpyrimidine</b>    | TTBP              |
| <b>Silver trifluoromethanesulfonate</b> | AgOTf             |

## 1. Experimental Section:

### 1.1. General experimental procedures and safety statement:

All reactions were carried out under nitrogen with anhydrous solvents in flame-dried glassware, unless otherwise noted. Glycosylation reactions were performed in the presence of molecular sieves, which were flame-dried right before the reaction under high vacuum. Glycosylation solvents were dried using a solvent purification system and used directly without further drying. Chemicals used were reagent grade as supplied except where noted. Analytical thin-layer chromatography was performed using silica gel 60 F254 glass plates. Compounds were visualized by UV light (254 nm) and by staining with a yellow solution containing  $\text{Ce}(\text{NH}_4)_2(\text{NO}_3)_6$  (0.5 g) and  $(\text{NH}_4)_6\text{Mo}_7\text{O}_{24} \cdot 4\text{H}_2\text{O}$  (24.0 g) in 6%  $\text{H}_2\text{SO}_4$  (500 mL). Flash column chromatography was performed on silica gel 60 (230-400 Mesh). Optical rotations were recorded on a Perkin Elmer 341 polarimeter ( $\lambda = 589$  nm, 1 dm cell).

No unexpected or unusually high safety hazards were encountered during this work.

### 1.2. Mass spectrometry (MS) analysis:

ESI-MS measurements were performed according to the published procedures<sup>1</sup> on a Q-TOF Ultima API LC-MS instrument with Waters 2795 Separation Module (Waters Corporation, Milford, MA). MALDI mass spectra were recorded on a Shimadzu Axima-CFR plus MALDI-TOF. The matrix used was 2,5-dihydroxy-benzoic acid (DHB) as the calibration compound.

### 1.3. Nuclear magnetic resonance analysis:

Proton and carbon nuclear magnetic resonance spectra ( $^1\text{H}$  NMR and  $^{13}\text{C}$  NMR) were recorded on an Agilent-500MHz spectrometer at ambient temperature with  $\text{CDCl}_3$  as the solvent unless otherwise stated. Chemical shifts are reported in parts per million (ppm) relative to residual protic solvent internal standard  $\text{CDCl}_3$ :  $^1\text{H}$  NMR at  $\delta$  7.26 ppm,  $^{13}\text{C}$  NMR at  $\delta$  77.36 ppm. All  $^{13}\text{C}$  NMR spectra were recorded with complete proton decoupling. Peak and coupling constants assignments are based on  $^1\text{H}$ -NMR,  $^1\text{H}$ - $^1\text{H}$  gCOSY and (or)  $^1\text{H}$ - $^{13}\text{C}$  gHMQC and  $^1\text{H}$ - $^{13}\text{C}$  gHMBC experiments.

### 1.4. Characterization of anomeric stereochemistry:

The stereochemistry of the newly formed glycosidic linkages in the oligosaccharide and intermediates are determined by  $^3\text{J}_{\text{H}_1, \text{H}_2}$  through  $^1\text{H}$ -NMR and/or  $^1\text{J}_{\text{C}_1, \text{H}_1}$  through gHMQC 2-D

NMR (without  $^1\text{H}$  decoupling). The smaller coupling constants of  $^3J_{\text{H}_1,\text{H}_2}$  (around 3 Hz) indicate  $\alpha$  linkages and larger coupling constants  $^3J_{\text{H}_1,\text{H}_2}$  (7.2 Hz or larger) indicate  $\beta$  linkages in glucose and galactosamine linkages.  $^1J_{\text{C}_1,\text{H}_1}$  around 170 Hz suggests  $\alpha$  linkages and 160 Hz suggests  $\beta$  linkages.<sup>2</sup>

### **1.5. General procedure for pre-activation based single-step glycosylation with *p*-TolSCI/AgOTf promoter:**

A solution of donor and freshly activated molecular sieve (MS) Å (700 mg) in DCM (0.01M donor concentration) was stirred for 30 min. under room temperature (rt) and cooled to  $-78\text{ }^\circ\text{C}$ . A solution of silver trifluoromethanesulfonate (AgOTf) (3 equiv. to donor) in anhydrous  $\text{Et}_2\text{O}/\text{DCM}$  (2 :1 v/v) was added to reaction solution without touching the wall of the flask. After 5 min., orange colored *p*-TolSCI (1 equiv. to donor) was added to the reaction mixture through a microsyringe. *p*-TolSCI should be added directly to the reaction solution to prevent it from freezing on the flask wall. The characteristic orange color disappeared in a few second indicating consumption of *p*-TolSCI promoter. TLC analysis could confirm the complete activation of donor in 5 minutes. A solution of acceptor with one equivalent 2,4,6-tri-*ter*-butylpyrimidine (TTBP) in DCM (2 mL) was added to the reaction via a syringe. The reaction was stirred for 1 h at  $-78\text{ }^\circ\text{C}$  then it could be warmed up to  $0\text{ }^\circ\text{C}$  under stirring in 2 hours depending on the reactivity of donor and acceptor. Upon reaction completion, the reaction mixture was diluted with DCM, quenched by triethylamine ( $\text{Et}_3\text{N}$ ) and filtered over Celite with DCM. The DCM solution was washed with  $\text{NaHCO}_3$  and  $\text{NaCl}$  solution. The organic layer was collected, dried over  $\text{Na}_2\text{SO}_4$ , concentrated and purified by silica gel chromatography.

### **1.6. General procedure for glycosylation promoted by NIS/TfOH promoter:**

A mixture of acceptor (1 equiv.) and thioglycoside donor (1.5 to 2 equiv.) was dissolved and co-evaporated with anhydrous toluene ( $2 \times 20\text{ mL}$ ) and dried in high vacuum. Then the mixture was dissolved in anhydrous DCM (typical final donor concentration 0.010 M), 4 Å molecular sieves was added and stirred at rt for 30 min. Then it was cooled to  $-30\text{ }^\circ\text{C}$  followed by the addition of *N*-iodosuccinimide (NIS) (1.2 equiv. to donor) and trifluoromethanesulfonic acid (TfOH) (0.3 equiv. to donor). The reaction was stirred at  $-30\text{ }^\circ\text{C}$  for 2 hours, if the reaction did not complete, the temperature was raised to  $0\text{ }^\circ\text{C}$  or rt till completion, after which it was quenched by



triethylamine (Et<sub>3</sub>N) and filtered by Celite, and the filtrate was concentrated under reduced pressure. Then the residue was purified by flash column chromatography.

#### **1.7. General procedure for removal of TBS:**

The TBS-protected compound was dissolved in pyridine (Py.) (0.2 M) in a plastic flask and cooled down to 0 °C, then followed by the addition of 65–70% HF.pyridine solution (v/v 1:2 with respect to pyridine). The solution was stirred until complete disappearance of the starting material as judged from TLC analysis. The reaction mixture was diluted with ethylacetate (EtOAc) (30 mL) and washed with saturated aqueous CuSO<sub>4</sub> solution (20 mL). The aqueous phase was extracted with EtOAc (30 mL) twice and the combined organic layers were washed with 1 M HCl solution, then with saturated aqueous NaHCO<sub>3</sub> solution (3×50 mL). After drying over Na<sub>2</sub>SO<sub>4</sub> and concentrated, the obtained residue was purified by flash column chromatography (Toluene/Acetone) to give the desired product.

#### **1.8. Synthesis of monosaccharide building blocks:**

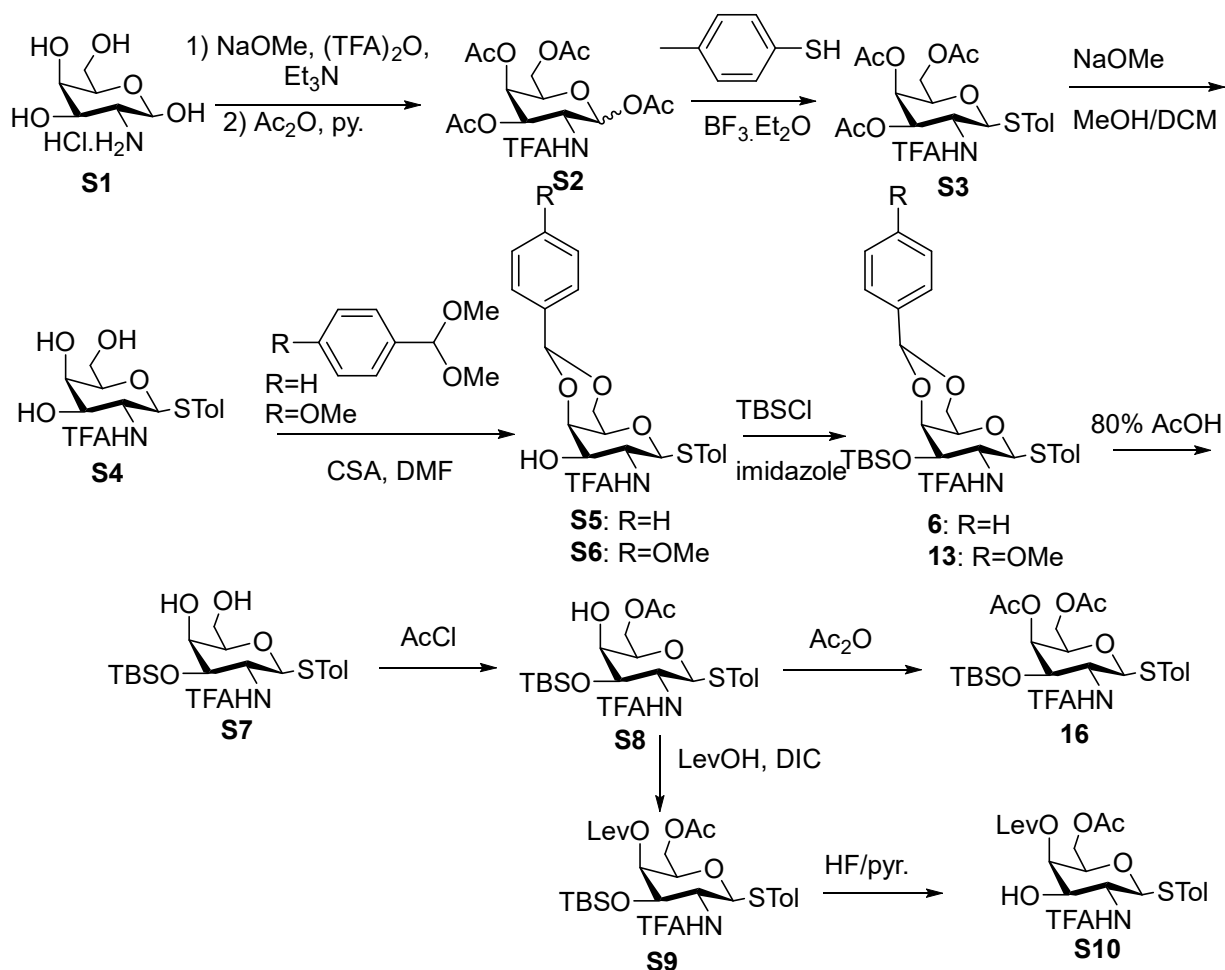

***p*-Tolyl 3,4,6-tri-*O*-acetyl-2-deoxy-2-*N*-trifluoroacetamido-1-thio-β-*D*-galactopyranoside **S3**:**

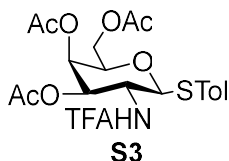

To a solution of galactosamine hydrochloride **S1** (21 g, 93.4 mmol) in dry MeOH (250 mL), NaOMe (105 mL, 1.3 M solution in MeOH) was added at rt. After stirring for 40 min, the mixture was cooled down to 0 °C, then TFA anhydride (14.2 mL, 98.1 mmol) was added followed by adding Et<sub>3</sub>N (13.6 mL, 94.0 mmol). The reaction mixture was stirred overnight at rt, then it was concentrated in vacuo. The residue was dissolved in pyridine (Py.) (300 mL) and acetic anhydride (Ac<sub>2</sub>O) (150 mL) and 4-dimethylaminopyridine (DMAP) (6.4 g, 46.7 mmol) was added at 0 °C. The reaction was stirred for 24 hours at rt, then it was diluted with EtOAc, washed with 1 M HCl, NaHCO<sub>3</sub>, and NaCl solutions, dried over Na<sub>2</sub>SO<sub>4</sub>, filtered, and concentrated. Flash chromatography (Hex:EtOAc, 3 : 1) gave a mixture of α,β anomers of 1,3,4,6-tetra-*O*-acetyl-2-

deoxy-2-trifluoroacetamido-D-galactopyranose **S2** (32.5 g, 75.5%). Comparison with literature data<sup>3</sup> confirms its identity. Compound **S2** (38.29 g, 86.4 mmol) and 4-methylbenzenethiol (11.8 g, 95 mmol) were dissolved in dry DCM (300 mL), followed by slow addition of boron trifluoride etherate (32.85 mL, 295 mmol) at 0 °C. The reaction was stirred at rt overnight under nitrogen. Upon completion, the reaction was quenched with a sat. NaHCO<sub>3</sub> solution, then diluted with DCM (100 mL) and extracted with DCM (3×100mL), washed with NaCl, dried over Na<sub>2</sub>SO<sub>4</sub>, concentrated and purified using column chromatography (Hex:EtOAc, 3:1) to afford the product **S3** (35.9 g, in 82%). <sup>1</sup>H NMR (500 MHz, Chloroform-*d*) δ 7.40 (d, *J* = 8.1 Hz, 2H), 7.14 – 7.10 (m, 2H), 7.07 (d, *J* = 9.4 Hz, 1H), 5.37 (dd, *J* = 3.3, 1.0 Hz, 1H), 5.22 (dd, *J* = 10.8, 3.3 Hz, 1H), 4.82 (d, *J* = 10.3 Hz, 1H), 4.27 – 4.07 (m, 3H), 3.97 – 3.91 (m, 1H), 2.33 (s, 3H), 2.11 (s, 3H), 2.02 (s, 3H), 1.94 (s, 3H). <sup>13</sup>C NMR (126 MHz, Chloroform-*d*) δ 170.75, 170.65, 170.27, 157.48, 157.18, 138.72, 133.35, 129.71, 127.98, 116.74, 114.45, 86.60, 74.49, 70.91, 66.71, 61.86, 49.91, 21.14, 20.65, 20.58, 20.40. ESI-MS: C<sub>21</sub>H<sub>24</sub>F<sub>3</sub>NO<sub>8</sub>S [M+NH<sub>4</sub>]<sup>+</sup> calcd: 525.1513, obsd: 525.1565. ***p*-Tolyl 4,6-*O*-benzylidene-3-*O*-*t*-butyldimethylsilyl-2-deoxy-2-*N*-trifluoroacetamido-1-thio-β-D-galactopyranoside 6:**

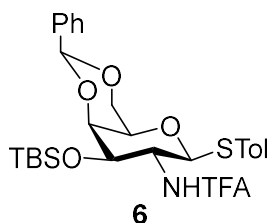

Compound **S3** (1 g, 2 mmol) was dissolved in DCM/MeOH (2:3, 50 mL), followed by addition of sodium metal at 0 °C until pH≈14 and the reaction was stirred for 2-3 h at 0 °C then Amberlite resin was added to adjust pH around 7. After filtration, the filtrate was concentrated and dried under vacuo to give product **S4** (0.68 g, 90%), which was used in the next step without further purification. Compound **S4** (0.3 g, 0.79 mmol) was dissolved in dry DMF (10 mL), and benzaldehyde dimethylacetal (0.21 mL, 1.4 mmol) was added. The pH was adjusted to 4 with a catalytic amount of camphorsulfonic acid (CSA) (91.4 mg, 0.39 mmol). The reaction mixture was stirred overnight at 60 °C. After the reaction was completed, it was neutralized with Et<sub>3</sub>N (4-5 drops). Then it was diluted with EtOAc, washed with water, dried over Na<sub>2</sub>SO<sub>4</sub>, and purification of the resulting residue by flash chromatography (Hex:EtOAc:DCM, 5:1:1) gave compound **S5** (0.26 g, 70%) as a colorless amorphous solid. Compound **S5** (0.26 g, 0.55 mmol) was dissolved in

DMF (50 mL), then *tert*-butyldimethylsilyl chloride (TBSCl) (0.1 g, 0.66 mmol) and imidazole (75.4 mg, 1.1 mmol) were added. The reaction was stirred at rt for 2 h and upon completion, it was diluted with EtOAc, washed with H<sub>2</sub>O, dried over Na<sub>2</sub>SO<sub>4</sub>, concentrated and purified by silica gel chromatography (Hex:EtOAc:DCM, 8:1:1) to afford **6** (0.29 g, 90%) as a white solid.  $[\alpha_D^{20}] = -1.9$  (C = 0.7, DCM). <sup>1</sup>H NMR (500 MHz, Chloroform-*d*)  $\delta$  7.54 – 7.51 (m, 2H), 7.48 – 7.45 (m, 2H), 7.40 – 7.36 (m, 3H), 7.03 (d, *J* = 7.8 Hz, 2H), 6.34 (d, *J* = 7.4 Hz, 1H), 5.52 (s, 1H), 5.31 (d, *J* = 10.1 Hz, 1H), 4.51 (dd, *J* = 10.2, 3.3 Hz, 1H), 4.41 (dd, *J* = 12.3, 1.7 Hz, 1H), 4.10 (dd, *J* = 3.5, 1.0 Hz, 1H), 4.04 (dd, *J* = 12.4, 1.7 Hz, 1H), 3.72 – 3.65 (m, 1H), 3.59 – 3.58 (m, 1H), 2.32 (s, 3H), 0.84 (s, 9H), 0.06 (s, 3H), 0.02 (s, 3H). <sup>13</sup>C NMR (126 MHz, Chloroform-*d*)  $\delta$  138.39, 137.86, 133.75, 129.85, 128.90, 128.05, 127.40, 126.23, 100.65, 83.09, 75.99, 70.11, 70.02, 69.39, 53.82, 29.71, 25.51, 21.22, 18.00, -4.72, -4.82. ESI-MS: C<sub>28</sub>H<sub>36</sub>F<sub>3</sub>NO<sub>5</sub>SSi [M+NH<sub>4</sub>]<sup>+</sup> calcd: 601.2374, obsd: 601.2329.

***p*-Tolyl 4,6-*O*-(4-methoxy)benzylidene-3-*O*-*t*-butyldimethylsilyl-2-deoxy-2-*N*-trifluoroacetamido-1-thio- $\beta$ -D-galactopyranoside **13**:**

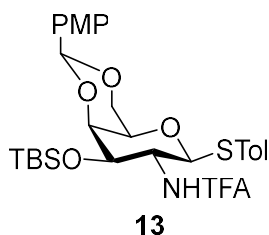

Compound **S4** (0.18 g, 0.47 mmol) was dissolved in in dry DMF (10 mL), and 4-methoxybenzaldehyde dimethylacetal (0.14 mL, 0.85 mmol) was added. The pH was adjusted to 4 with a catalytic amount of CSA (54.8 mg, 0.24 mmol). The reaction mixture was stirred overnight at 60 °C. After the reaction completed, it was neutralized with Et<sub>3</sub>N (4-5 drops), diluted with EtOAc, washed with water, and dried over Na<sub>2</sub>SO<sub>4</sub>. Purification of the resulting residue by flash chromatography (Hex:EtOAc:DCM, 7:1:1) gave compound **S6** (0.15 g, 65%) as a colorless amorphous solid. Compound **S6** (0.15 g, 0.30 mmol) was dissolved in DMF (50 mL), then TBSCl (54 mg, 0.36 mmol) and imidazole (41 mg, 0.60 mmol) were added. The reaction was stirred at rt for 2 h. Upon completion, it was diluted with EtOAc, washed with H<sub>2</sub>O, dried over Na<sub>2</sub>SO<sub>4</sub>, concentrated and purified by silica gel chromatography (Hex:EtOAc:DCM, 8:1:1) to afford **13** (0.17 g, 92%) as a white solid.  $[\alpha_D^{20}] = +2.1$  (C = 1.35, DCM). <sup>1</sup>H NMR (500 MHz, Chloroform-*d*)  $\delta$  7.54 – 7.50 (m, 2H), 7.40 – 7.37 (m, 2H), 7.06 (d, *J* = 7.9 Hz, 2H), 6.91 – 6.88 (m, 2H), 6.34

(d,  $J = 7.5$  Hz, 1H), 5.47 (s, 1H), 5.29 (d,  $J = 10.1$  Hz, 1H), 4.49 (dd,  $J = 10.4, 3.4$  Hz, 1H), 4.38 (dd,  $J = 12.4, 1.6$  Hz, 1H), 4.08 (d,  $J = 3.4$  Hz, 1H), 4.02 (dd,  $J = 12.4, 1.7$  Hz, 1H), 3.84 (s, 3H), 3.72 – 3.65 (m, 1H), 3.57 (q,  $J = 1.5$  Hz, 1H), 2.34 (s, 3H), 0.83 (s, 9H), 0.06 (s, 3H), 0.02 (s, 3H).  $^{13}\text{C}$  NMR (126 MHz, Chloroform-*d*)  $\delta$  159.98, 157.18, 138.37, 133.78, 130.45, 129.85, 127.55, 127.45, 113.38, 100.62, 83.18, 75.94, 70.19, 70.02, 69.36, 55.31, 53.82, 25.52, 21.25, 18.00, -4.70, -4.81. ESI-MS:  $\text{C}_{29}\text{H}_{38}\text{F}_3\text{NO}_6\text{SSi}$   $[\text{M}+\text{NH}_4]^+$  calcd: 631.2479, obsd: 631.2491.

***p*-Tolyl 3-*O*-*t*-butyldimethylsilyl-2-deoxy-2-*N*-trifluoroacetamido-1-thio- $\beta$ -D-galactopyranoside **S7**:**

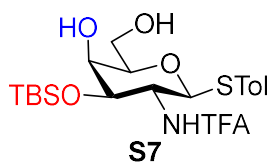

Compound **9** (1.5 g, 2.3 mmol) was dissolved in aqueous acetic acid (AcOH) 80% (50 mL). The mixture was stirred at 80 °C for 3 h. Upon completion, the mixture was concentrated *in vacuo*, and the residue was purified with flash chromatography (DCM:MeOH, 20:1) to give **S7** (1 g, 89.3%) as white solid.  $[\alpha_{\text{D}}^{20}] = -2.2$  (C = 0.09, DCM).  $^1\text{H}$  NMR (500 MHz, Chloroform-*d*)  $\delta$  7.36 (d,  $J = 7.9$  Hz, 2H), 7.10 (d,  $J = 7.9$  Hz, 2H), 6.67 (d,  $J = 7.4$  Hz, 1H), 4.69 (d,  $J = 9.5$  Hz, 1H), 3.91 – 3.72 (m, 4H), 3.60 – 3.54 (m, 2H), 2.49 – 2.39 (m, 1H), 2.32 (s, 3H), 0.84 (s, 9H), 0.06 (s, 3H), 0.04 (s, 3H).  $^{13}\text{C}$  NMR (126 MHz, Chloroform-*d*)  $\delta$  158.29, 157.99, 139.01, 134.05, 129.94, 125.70, 116.85, 114.55, 83.92, 80.22, 73.90, 69.89, 62.77, 52.19, 25.75, 21.18, 18.19, -4.10, -4.76. ESI-MS:  $\text{C}_{21}\text{H}_{32}\text{F}_3\text{NO}_5\text{SSi}$   $[\text{M}+\text{NH}_4]^+$  calcd: 513.2061, obsd: 513.2081.

***p*-Tolyl 6-*O*-acetyl-3-*O*-*t*-butyldimethylsilyl-2-deoxy-2-*N*-trifluoroacetamido-1-thio- $\beta$ -D-galactopyranoside **S8**:**

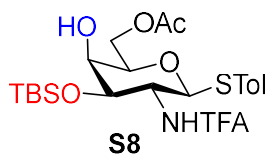

To a solution of **S7** (3 g, 6.1 mmol) in DCM (30 mL), acetyl chloride (AcCl) (0.475 mL, 6.7 mmol) and lutidine (1.6 mL, 13.7 mmol) were added at 0 °C. The reaction was stirred at 0 °C for 2 h, then the temperature was raised to rt. Upon completion, the mixture was washed with 1M HCl,  $\text{NaHCO}_3$ , and NaCl, dried over  $\text{Na}_2\text{SO}_4$ , concentrated and the residue was purified with silica gel chromatography (Hex:EtOAc:DCM, 4:1:1) to give **S8** (3 g, 92%) as white solid.  $^1\text{H}$  NMR (500

MHz, Chloroform-*d*)  $\delta$  7.47 (d,  $J = 9.0$  Hz, 1H), 7.33 – 7.29 (m, 2H), 7.02 (d,  $J = 8.0$  Hz, 2H), 4.88 (d,  $J = 10.4$  Hz, 1H), 4.39 (dd,  $J = 11.6, 7.9$  Hz, 1H), 4.21 (dd,  $J = 11.6, 4.3$  Hz, 1H), 4.08 (dd,  $J = 9.8, 3.2$  Hz, 1H), 3.98 (t,  $J = 9.7$  Hz, 1H), 3.81 – 3.76 (m, 2H), 2.48 (s, 1H), 2.28 (s, 3H), 1.97 (s, 3H), 0.85 (s, 9H), 0.09 (s, 3H), 0.04 (s, 3H).  $^{13}\text{C}$  NMR (126 MHz, Chloroform-*d*)  $\delta$  171.18, 157.89, 157.60, 137.95, 132.61, 129.55, 128.98, 116.85, 114.56, 85.83, 75.48, 72.15, 68.80, 63.66, 52.79, 25.46, 21.09, 20.76, 17.73, -4.55, -5.12. ESI-MS:  $\text{C}_{23}\text{H}_{34}\text{F}_3\text{NO}_6\text{SSi}$   $[\text{M}+\text{NH}_4]^+$  calcd: 555.2166, obsd: 555.2208.

***p*-Tolyl 4,6-di-*O*-acetyl-3-*O*-*t*-butyldimethylsilyl-2-deoxy-2-*N*-trifluoroacetamido-1-thio- $\beta$ -D-galactopyranoside **16**:**

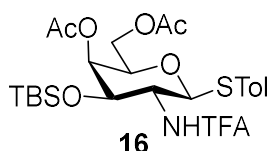

Compound **S7** (1 g, 2 mmol) was dissolved in pyridine (8 mL), then  $\text{Ac}_2\text{O}$  (4 mL) was added and the reaction was stirred for 4 h. After completion, the reaction was diluted with EtOAc, washed with 1 M HCl,  $\text{NaHCO}_3$ , and NaCl, dried over  $\text{Na}_2\text{SO}_4$ , concentrated and purified by flash chromatography (Hex:EtOAc:DCM, 4:1:1) to give **16** (1.1 g, 94%) as white solid.  $[\alpha_D^{20}] = +15.1$  ( $C = 0.57$ , DCM).  $^1\text{H}$  NMR (500 MHz, Chloroform-*d*)  $\delta$  7.36 (d,  $J = 7.7$  Hz, 2H), 7.08 (d,  $J = 7.8$  Hz, 2H), 6.96 (d,  $J = 8.8$  Hz, 1H), 5.24 (d,  $J = 3.3$  Hz, 1H), 4.98 (d,  $J = 10.4$  Hz, 1H), 4.15 – 4.04 (m, 3H), 3.94 – 3.83 (m, 2H), 2.31 (s, 3H), 2.07 (s, 3H), 2.00 (s, 3H), 0.79 (s, 9H), 0.06 (s, 3H), -0.00 (s, 3H).  $^{13}\text{C}$  NMR (126 MHz, Chloroform-*d*)  $\delta$  170.74, 170.12, 157.51, 157.21, 138.31, 132.85, 129.64, 128.73, 116.77, 114.48, 74.85, 69.30, 62.62, 25.30, 21.12, 20.67, 20.65, 17.56, -4.67, -5.38. ESI-MS:  $\text{C}_{25}\text{H}_{36}\text{F}_3\text{NO}_7\text{SSi}$   $[\text{M}+\text{H}]^+$  calcd: 580.2007, obsd: 580.2026.

***p*-Tolyl 6-*O*-acetyl-3-*O*-*t*-butyldimethylsilyl-2-deoxy-4-*O*-levulinoyl-2-*N*-trifluoroacetamido-1-thio- $\beta$ -D-galactopyranoside **S9**:**

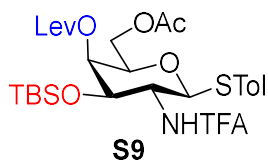

Compound **S8** (3 g, 5.6 mmol) was dissolved in DCM (30 mL), then levulinic acid (LevOH) (0.86 mL, 8.4 mmol), *N,N'*-diisopropylcarbodiimide (DIC) (1.1 mL, 7.4 mmol) and DMAP (0.886 g, 7.3 mmol) were added. The reaction mixture was stirred at 40 °C. Upon completion, the mixture was washed with 1 M HCl, NaHCO<sub>3</sub>, and NaCl solutions, dried over Na<sub>2</sub>SO<sub>4</sub>, concentrated and the crude was purified with silica gel chromatography (Hex:EtOAc:DCM, 5:1:1) to afford **S9** (3 g, 84.7%) as white solid. [ $\alpha_D^{20}$ ] = +17.0 (C = 0.54, DCM). <sup>1</sup>H NMR (500 MHz, Chloroform-*d*)  $\delta$  7.41 – 7.37 (m, 2H), 7.12 – 7.08 (m, 2H), 6.80 (d, *J* = 8.6 Hz, 1H), 5.25 (dd, *J* = 3.3, 0.9 Hz, 1H), 5.01 (d, *J* = 10.4 Hz, 1H), 4.16 – 4.11 (m, 3H), 3.91 – 3.83 (m, 2H), 2.79 – 2.73 (m, 1H), 2.71 – 2.63 (m, 2H), 2.58 – 2.51 (m, 1H), 2.33 (s, 3H), 2.18 (s, 3H), 2.03 (s, 3H), 0.79 (s, 9H), 0.06 (s, 3H), 0.00 (s, 3H). <sup>13</sup>C NMR (126 MHz, Chloroform-*d*)  $\delta$  206.37, 171.67, 170.79, 157.35, 157.06, 138.41, 133.11, 129.66, 128.48, 116.77, 114.47, 77.26, 74.91, 69.51, 62.49, 37.88, 29.80, 27.88, 25.71, 25.36, 21.19, 21.16, 20.74, 17.60, 17.59, -4.64, -5.41. ESI-MS: C<sub>28</sub>H<sub>40</sub>F<sub>3</sub>NO<sub>8</sub>SSi [M+NH<sub>4</sub>]<sup>+</sup> calcd: 653.2534, obsd: 653.2578.

***p*-Tolyl 6-*O*-acetyl-2-deoxy-4-*O*-levulinoyl-2-*N*-trifluoroacetamido-1-thio- $\beta$ -D-galactopyranoside **S10**:**

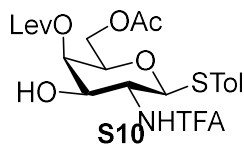

Following the general procedure for TBS removal, monosaccharide acceptor **S10** was obtained (1.11 g, 90%) from **S9** (1.5 g, 2.36 mmol). <sup>1</sup>H NMR (500 MHz, Chloroform-*d*)  $\delta$  7.74 (d, *J* = 8.9 Hz, 1H), 7.35 (d, *J* = 7.9 Hz, 2H), 7.07 (d, *J* = 7.9 Hz, 2H), 5.28 (d, *J* = 3.2 Hz, 1H), 4.81 (d, *J* = 10.3 Hz, 1H), 4.07 (d, *J* = 6.3 Hz, 2H), 3.99 (ddd, *J* = 11.1, 8.4, 3.3 Hz, 1H), 3.89 – 3.78 (m, 3H), 2.76 – 2.68 (m, 2H), 2.61 – 2.48 (m, 2H), 2.30 (s, 3H), 2.10 (s, 3H), 1.99 (s, 3H). <sup>13</sup>C NMR (126 MHz, Chloroform-*d*)  $\delta$  209.50, 172.47, 170.81, 158.08, 157.78, 138.30, 133.13, 129.57, 128.47, 116.90, 114.62, 86.08, 74.68, 70.40, 69.74, 62.30, 52.71, 38.16, 29.63, 28.11, 21.10, 20.65, 14.12. ESI-MS: C<sub>22</sub>H<sub>26</sub>F<sub>3</sub>NO<sub>8</sub>S [M+NH<sub>4</sub>]<sup>+</sup> calcd: 539.1669, obsd: 539.1698.

***p*-Tolyl 3-*O*-benzyl-6-*O*-*t*-butyldimethylsilyl-2-*O*-levulinoyl-1-thio- $\beta$ -D-glucopyranoside 7:**

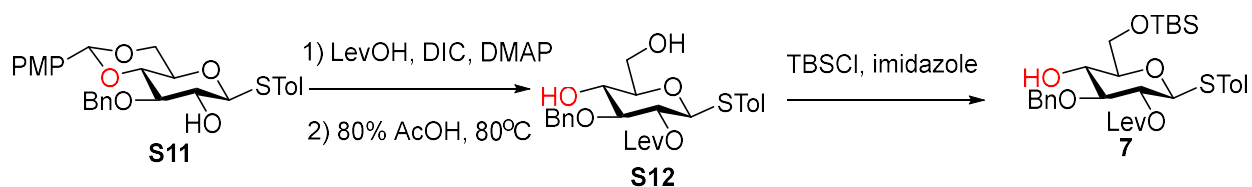

Compound **S11**<sup>4</sup> (0.11 g, 0.23 mmol) was dissolved in DCM (15 mL), then LevOH (0.05 mL, 0.49 mmol), DIC (0.07 mL, 0.48 mmol) and DMAP (0.056 g, 0.46 mmol) were added and the reaction was stirred at 40 °C for 2h. The mixture was washed with 1 M HCl, NaHCO<sub>3</sub>, and NaCl solutions, dried over Na<sub>2</sub>SO<sub>4</sub>, concentrated. The crude mixture was then dissolved in DCM (4 mL) and 80% AcOH (25 mL) was added. The reaction mixture was stirred at 80 °C for 2 h. Upon completion, the mixture was concentrated and the crude was purified with silica gel chromatography (Hex:EtOAc, 2:1) to afford **S12** (0.102 g, 93.6% in 2 steps) as white solid. Next, compound **S12** (0.102 g, 0.21 mmol) was dissolved in DCM (10 mL) and TBSCl (0.036 g, 0.24 mmol) and imidazole (0.016 g, 0.24 mmol) were added. The reaction was stirred and after completion, it was concentrated and purified through silica gel chromatography (Hex:EtOAc, 5:1) to afford **7** (0.115 g, 90.5%) as colorless glassy solid.  $[\alpha_D^{20}] = -6.5$  (C = 8.9, DCM). <sup>1</sup>H NMR (500 MHz, Chloroform-*d*) δ 7.40 – 7.36 (m, 2H), 7.35 – 7.24 (m, 5H), 7.12 – 7.07 (m, 2H), 4.93 (dd, *J* = 10.1, 9.1 Hz, 1H), 4.57 (d, *J* = 10.0 Hz, 1H), 3.92 – 3.84 (m, 2H), 3.70 (t, *J* = 9.2 Hz, 1H), 3.54 (d, *J* = 8.9 Hz, 1H), 3.37 (dt, *J* = 9.8, 5.0 Hz, 1H), 3.02 (s, 1H), 2.79 – 2.68 (m, 2H), 2.64 – 2.51 (m, 2H), 2.33 (s, 3H), 2.18 (s, 3H), 0.91 (s, 9H), 0.10 (s, 3H), 0.09 (s, 3H). <sup>13</sup>C NMR (126 MHz, Chloroform-*d*) δ 206.29, 171.42, 138.32, 138.00, 132.86, 129.60, 129.08, 128.46, 127.92, 127.77, 86.53, 83.68, 78.61, 74.64, 72.37, 71.66, 64.21, 37.85, 29.90, 28.14, 25.87, 21.16, 18.26, -5.44. ESI-MS: C<sub>31</sub>H<sub>44</sub>O<sub>7</sub>SSi [M+NH<sub>4</sub>]<sup>+</sup> calcd: 606.2915, obsd: 606.2990.

***p*-Tolyl 2-*O*-benzoyl-3-*O*-benzyl-6-*O*-*t*-butyldimethylsilyl-1-thio-β-D-glucopyranoside **8**:**

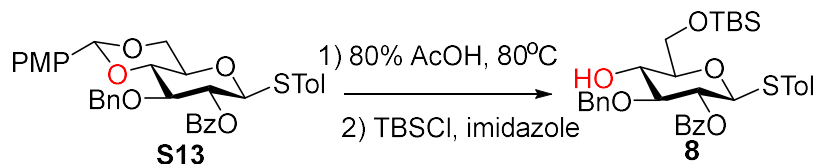

Compound **S13**<sup>4</sup> (0.12 g, 0.2 mmol) was dissolved in DCM (4 mL) and 80% AcOH (25 mL) was added. The reaction mixture was stirred at 80 °C for 2 h. Upon completion, the mixture was concentrated and the crude was purified with silica gel chromatography (Hex:EtOAc, 2:1) to afford the diol (0.091 g, 95.7%) as white solid. Next, the diol (0.091 g, 0.19 mmol) was dissolved in DCM (10 mL), and TBSCl (0.031 g, 0.21 mmol) and imidazole (0.019 g, 0.28 mmol) were added.



The reaction was stirred and after completion, it was concentrated and purified through silica gel chromatography (Hex:EtOAc, 5:1) to afford **8** (0.1 g, 91%) as colorless glassy solid.  $[\alpha_D^{20}] = +13.3$  (C = 6.2, DCM).  $^1\text{H NMR}$  (500 MHz, Chloroform-*d*)  $\delta$  8.09 – 8.04 (m, 2H), 7.62 – 7.58 (m, 1H), 7.50 – 7.44 (m, 2H), 7.37 – 7.33 (m, 2H), 7.23 – 7.12 (m, 5H), 7.09 – 7.05 (m, 2H), 5.21 (dd,  $J = 10.0, 9.0$  Hz, 1H), 4.75 (d,  $J = 10.1$  Hz, 1H), 4.72 – 4.71 (d,  $J = 1.1$  Hz, 2H), 3.98 – 3.88 (m, 2H), 3.80 (td,  $J = 9.2, 1.9$  Hz, 1H), 3.71 (t,  $J = 8.9$  Hz, 1H), 3.47 (dt,  $J = 9.8, 5.0$  Hz, 1H), 3.07 (d,  $J = 2.0$  Hz, 1H), 2.32 (s, 3H), 0.94 (s, 9H), 0.14 (s, 3H), 0.12 (s, 3H).  $^{13}\text{C NMR}$  (126 MHz, Chloroform-*d*)  $\delta$  165.18, 138.03, 137.91, 133.18, 133.06, 129.94, 129.87, 129.57, 129.02, 128.42, 128.34, 128.03, 127.72, 86.64, 83.57, 78.63, 74.69, 72.65, 72.00, 64.35, 25.90, 21.16, 18.29, -5.41. ESI-MS:  $\text{C}_{33}\text{H}_{42}\text{O}_6\text{SSi}$   $[\text{M}+\text{NH}_4]^+$  calcd: 612.2810, obsd: 612.2868.

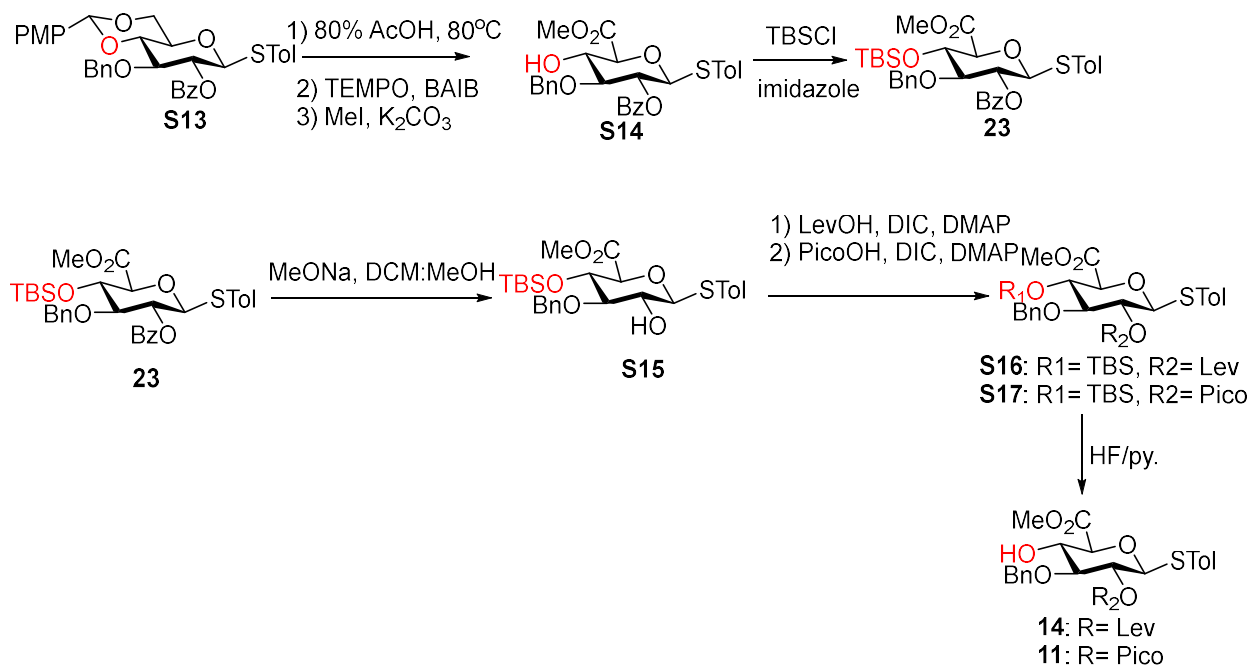

**Methyl (*p*-tolyl 3-*O*-benzyl-2-*O*-benzoyl-4-*O*-*t*-butyldimethylsilyl-1-thio- $\beta$ -D-glucopyranosyluronate) **23**:**

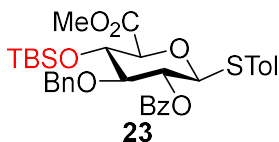

Compound **S13**<sup>4</sup> (1.5 g, 2.5 mmol) was dissolved in DCM (10 mL) and then 80% AcOH solution (30 mL) was added. The reaction mixture was stirred at 80 °C for 2 h. Upon completion, the mixture was concentrated and the crude was purified with silica gel chromatography (Hex:EtOAc,

2:1) to afford the diol (1.1 g, 91.7%) as white solid. To a solution of the resulting diol (1.1 g, 2.6 mmol) in DCM/*t*BuOH/H<sub>2</sub>O (4:1:1, 18 mL), TEMPO (0.107 g, 0.69 mmol) and BAIB (1.47 g, 4.6 mmol) were added. The reaction was stirred for 5 h till oxidation of **17** was completed (monitored by TLC). Then the reaction was quenched with brine (5 mL) and extracted with DCM (3\*15 mL). The organic layers were combined and dried over Na<sub>2</sub>SO<sub>4</sub> and concentrated under vacuo. The residue was then dissolved in dry DMF (6 mL) and methyl iodide (1.4 mL, 22.9 mmol) and K<sub>2</sub>CO<sub>3</sub> (1.6 g, 11.4 mmol) were added. The mixture was stirred overnight, then diluted with EtOAc (50 mL), washed with saturated NaHCO<sub>3</sub>, brine, dried over Na<sub>2</sub>SO<sub>4</sub>, concentrated and the residue was purified using column chromatography (Hex:EtOAc, 4:1) to give **S14** (1 g, 86%% in 2 steps). <sup>1</sup>H NMR (500 MHz, Chloroform-*d*) δ 7.83 (dd, *J* = 8.3, 1.4 Hz, 2H), 7.58 – 7.54 (m, 3H), 7.39 – 7.36 (m, 2H), 7.16 – 7.06 (m, 7H), 5.41 – 5.36 (m, 1H), 4.76 (d, *J* = 11.6 Hz, 1H), 4.68 (d, *J* = 11.6 Hz, 1H), 4.65 (d, *J* = 9.5 Hz, 1H), 4.03 (d, *J* = 9.4 Hz, 1H), 3.78 (s, 3H), 3.63 (d, *J* = 3.7 Hz, 1H), 2.25 (s, 3H). <sup>13</sup>C NMR (126 MHz, Chloroform-*d*) δ 168.90, 164.74, 142.07, 137.51, 134.80, 133.39, 129.91, 129.83, 129.47, 129.07, 128.36, 128.30, 128.25, 128.10, 127.71, 125.99, 93.09, 81.51, 77.81, 74.61, 71.39, 67.89, 52.81, 21.39. Compound **S14** (1 g, 1.97 mmol) was dissolved in py. (15 mL), then TBSCl (0.89 g, 5.9 mmol) was added. The reaction was heated at 50 °C overnight till the reaction was completed. The mixture was diluted with EtOAc (50 mL), washed with 1M HCl, NaHCO<sub>3</sub>, NaCl, concentrated and purified with silica gel chromatography (Hex:EtOAc, 6:1) to afford **23** (1 g, 81.9% yield) as white solid. <sup>1</sup>H NMR (500 MHz, Chloroform-*d*) δ 8.04 – 8.00 (m, 2H), 7.44 – 7.32 (m, 5H), 7.15 – 7.06 (m, 7H), 5.34 (dd, *J* = 9.9, 8.7 Hz, 1H), 4.86 (d, *J* = 9.9 Hz, 1H), 4.67 (s, 2H), 4.08 – 4.01 (m, 2H), 3.79 (s, 3H), 3.75 (t, *J* = 8.3 Hz, 1H), 2.30 (s, 3H), 0.87 (s, 9H), -0.00 (d, *J* = 3.7 Hz, 6H). <sup>13</sup>C NMR (126 MHz, Chloroform-*d*) δ 168.45, 165.10, 162.37, 138.30, 137.56, 133.30, 133.21, 129.80, 129.74, 129.70, 128.77, 128.60, 128.45, 128.10, 127.60, 127.45, 87.17, 83.87, 80.25, 77.44, 75.15, 72.30, 72.14, 52.43, 25.76, 21.18, 17.90, -3.94, -5.17. ESI-MS: C<sub>33</sub>H<sub>42</sub>O<sub>5</sub>SSi [M+H]<sup>+</sup> calcd: 579.2595, obsd: 579.2589.

**Methyl (*p*-tolyl 3-*O*-benzyl-2-*O*-picolinoyl-1-thio-β-*D*-glucopyranosyluronate) **11**:**

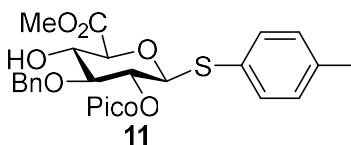

Compound **23** (1.5 g, 2.4 mmol) was dissolved in dry DCM/MeOH (2:3, 50 mL), followed by the addition of sodium metal until pH $\approx$ 14 and the reaction was stirred for 2-3 h at rt. Amberlite resin

was then added to adjust pH to around 7. After filtration, the filtrate was concentrated and the residue was purified with silica gel chromatography (Hex:EtOAc, 8:1) to give **S15** (1 g, 80%) as a white solid. To a solution of **S15** (0.3 g, 0.58 mmol) in DCM (5 mL), 2-picolinic acid (PicoOH) (0.14 g, 1.2 mmol), DIC (0.179 mL, 1.2 mmol) and DMAP (0.14 g, 1.2 mmol) were added and the reaction mixture was stirred at 40 °C for 2 h. Upon completion, the mixture was washed with 1 M HCl, NaHCO<sub>3</sub>, and NaCl solutions, dried over Na<sub>2</sub>SO<sub>4</sub>, concentrated and the crude was purified with silica gel chromatography (Hex:EtOAc, 4:1) to afford the product **S17** (0.32 g, 89%) as a white solid. Following the general procedure for TBS removal, monosaccharide acceptor **11** was obtained (0.24 g, 92%) as a white solid.  $[\alpha_D^{20}] = +10$  (C = 0.2, DCM). <sup>1</sup>H NMR (500 MHz, Chloroform-*d*) δ 8.75 (d, *J* = 5.0 Hz, 1H), 8.11 (d, *J* = 7.8 Hz, 1H), 7.82 (t, *J* = 7.8 Hz, 1H), 7.49 – 7.43 (m, 1H), 7.36 (d, *J* = 7.8 Hz, 2H), 7.13 – 7.03 (m, 7H), 5.29 (t, *J* = 9.5 Hz, 1H), 4.89 (d, *J* = 10.1 Hz, 1H), 4.78 (d, *J* = 11.5 Hz, 1H), 4.70 (d, *J* = 11.6 Hz, 1H), 4.03 – 3.94 (m, 2H), 3.88 (t, *J* = 8.8 Hz, 1H), 3.79 (s, 3H), 3.67 (s, 1H), 2.29 (s, 3H). <sup>13</sup>C NMR (126 MHz, Chloroform-*d*) δ 169.28, 163.74, 149.88, 147.37, 138.41, 137.86, 137.11, 133.44, 129.63, 128.18, 128.15, 127.88, 127.56, 127.20, 125.76, 86.77, 82.59, 77.90, 74.91, 72.30, 71.93, 52.83, 21.17. ESI-MS: C<sub>27</sub>H<sub>27</sub>NO<sub>7</sub>S [M+NH<sub>4</sub>]<sup>+</sup> calcd: 527.1846, obsd: 527.1876.

**Methyl (*p*-tolyl 3-*O*-benzyl-2-*O*-levulinoyl-1-thio-β-D-glucopyranosyluronate) 14:**

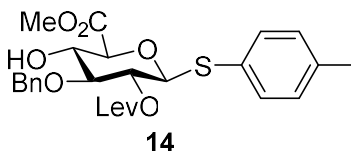

Compound **23** (1.5 g, 2.4 mmol) was dissolved in dry DCM/MeOH (2:3, 50 mL), followed by addition of sodium metal until pH ≈ 14 and the reaction was stirred for 2-3 h at rt. Amberlite resin was added to adjust pH around 7. After filtration, the filtrate was concentrated and the residue was purified with silica gel chromatography (Hex:EtOAc, 8:1) to give product **S15** (1 g, 80%) as a white solid. To a solution of **S15** (0.5 g, 0.96 mmol) in DCM (5 mL), LevOH (0.197 mL, 1.9 mmol), DIC (0.299 mL, 1.9 mmol), and DMAP (0.236 g, 1.9 mmol) were added and the reaction mixture was stirred at 40 °C for 2 h. Upon completion, the mixture was washed with 1 M HCl, NaHCO<sub>3</sub>, and NaCl, dried over Na<sub>2</sub>SO<sub>4</sub>, concentrated and the crude was purified with silica gel chromatography (Hex:EtOAc, 8:1) to afford the product **S16** (0.52, 87.5%) as white solid. Following the general procedure for TBS removal, monosaccharide acceptor **14** was obtained (0.39 g, 92%) as a white solid.  $[\alpha_D^{20}] = -14$  (C = 0.05, DCM). <sup>1</sup>H NMR (500 MHz, Chloroform-*d*)

$\delta$  7.42 – 7.38 (m, 2H), 7.35 – 7.23 (m, 5H), 7.13 – 7.09 (m, 2H), 4.95 (dd,  $J$  = 10.1, 9.1 Hz, 1H), 4.82 – 4.73 (m, 2H), 4.59 (d,  $J$  = 10.1 Hz, 1H), 3.92 (ddd,  $J$  = 9.7, 8.7, 3.0 Hz, 1H), 3.85 (d,  $J$  = 9.8 Hz, 1H), 3.81 (s, 3H), 3.57 (t,  $J$  = 8.9 Hz, 1H), 3.27 (d,  $J$  = 3.0 Hz, 1H), 2.73 (td,  $J$  = 6.7, 4.8 Hz, 2H), 2.62 – 2.48 (m, 2H), 2.33 (s, 3H), 2.17 (s, 3H).  $^{13}\text{C}$  NMR (126 MHz, Chloroform- $d$ )  $\delta$  206.34, 171.33, 169.25, 138.44, 138.14, 133.20, 129.71, 128.51, 128.43, 127.97, 127.80, 87.25, 82.52, 77.72, 74.73, 71.74, 71.08, 52.86, 37.80, 29.90, 28.05, 21.19. ESI-MS:  $\text{C}_{26}\text{H}_{30}\text{O}_8\text{S}$   $[\text{M}+\text{NH}_4]^+$  calcd: 520.2000, obsd: 520.1986.

***p*-Tolyl 2,3-di-*O*-benzoyl-4-*O*-*t*-butyldimethylsilyl-6-levulinoyl-1-thio- $\beta$ -D-glucopyranoside **S22**:**

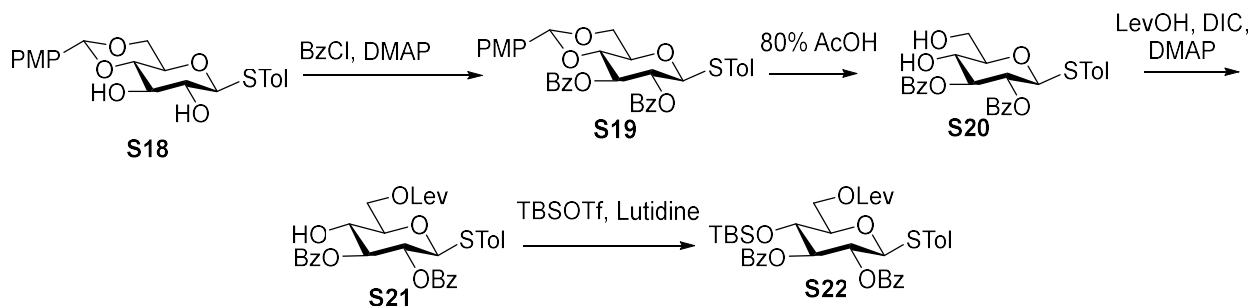

Compound **S18**<sup>4</sup> (8.6 g, 21.3 mmol) was dissolved in Py. (30 mL), then benzoyl chloride (14.8 mL, 127.6 mmol) and DMAP (10.39 g, 85 mmol) were added. The reaction was stirred at rt till completion. The reaction mixture was diluted with EtOAc, washed with 1 M HCl,  $\text{NaHCO}_3$ , and NaCl solutions, dried over  $\text{Na}_2\text{SO}_4$ , concentrated and the crude was purified through crystallization (Hex:EtOAc) to afford **S19** (10 g, 77%). Then **S19** (1 g, 1.6 mmol) was dissolved in aqueous AcOH 80%. The reaction was stirred at 80 °C for 2 h till completion. The mixture was concentrated in vacuo and the residue was purified with flash chromatography (DCM:MeOH, 20:1) to afford the diol **S20** as white solid. The diol **S20** (8.45 g, 17.1 mmol) was dissolved in DCM (80 mL) and LevOH (2.1 mL, 20.5 mmol), DIC (3.05 mL, 20.5 mmol), and DMAP (2.5 g, 20.5 mmol) were added. The reaction mixture was stirred at rt for 6 h. The mixture was washed with 1 M HCl,  $\text{NaHCO}_3$ , and NaCl, dried over  $\text{Na}_2\text{SO}_4$ , concentrated and the crude was purified with silica gel chromatography (Hex:EtOAc, 8:1) to afford the product **S21** (6.53, 61%) as white solid. Then **S21** (6.53g, 11 mmol) was dissolved in DCM (40 mL). The reaction was cooled to -60 °C, followed by adding tert-butyldimethylsilyl trifluoromethanesulfonate (TBSOTf) (2.53 mL, 11 mmol) and lutidine (1.27 mL, 11 mmol). The reaction was stirred at -60 °C for 1 h, then warmed up to 0 °C.

Upon completion, the reaction was washed with 1 M HCl, NaHCO<sub>3</sub>, and NaCl, dried over Na<sub>2</sub>SO<sub>4</sub>, concentrated and the crude was purified through silica gel chromatography (Hex:EtOAc, 8:1) to afford **S22** (7.2 g, 92%) as white solid. <sup>1</sup>H NMR (500 MHz, Chloroform-*d*) δ 7.92 – 7.86 (m, 4H), 7.51 – 7.45 (m, 2H), 7.40 – 7.31 (m, 6H), 7.12 – 7.08 (m, 2H), 5.61 (t, *J* = 9.2 Hz, 1H), 5.29 (t, *J* = 9.8 Hz, 1H), 4.88 (d, *J* = 10.0 Hz, 1H), 4.58 (dd, *J* = 11.8, 2.2 Hz, 1H), 4.18 (dd, *J* = 11.8, 5.4 Hz, 1H), 3.97 (t, *J* = 9.2 Hz, 1H), 3.72 (ddd, *J* = 9.5, 5.4, 2.2 Hz, 1H), 2.84 – 2.78 (m, 2H), 2.71 – 2.64 (m, 2H), 2.34 (s, 3H), 2.23 (s, 3H), 0.76 (s, 9H), 0.04 (s, 3H), -0.19 (s, 3H). <sup>13</sup>C NMR (126 MHz, Chloroform-*d*) δ 206.34, 172.38, 165.77, 165.26, 138.33, 133.35, 133.15, 133.08, 129.79, 129.70, 129.60, 129.25, 128.41, 128.29, 86.14, 78.52, 76.94, 70.90, 69.31, 63.13, 37.88, 29.94, 27.87, 25.54, 21.20, 17.81, -4.17, -4.78. ESI-MS: C<sub>38</sub>H<sub>46</sub>O<sub>9</sub>SSi [M+NH<sub>4</sub>]<sup>+</sup> calcd: 724.2970, obsd: 724.2995.

### **1.9.Synthesis of disaccharides containing *N*-TFA groups:**

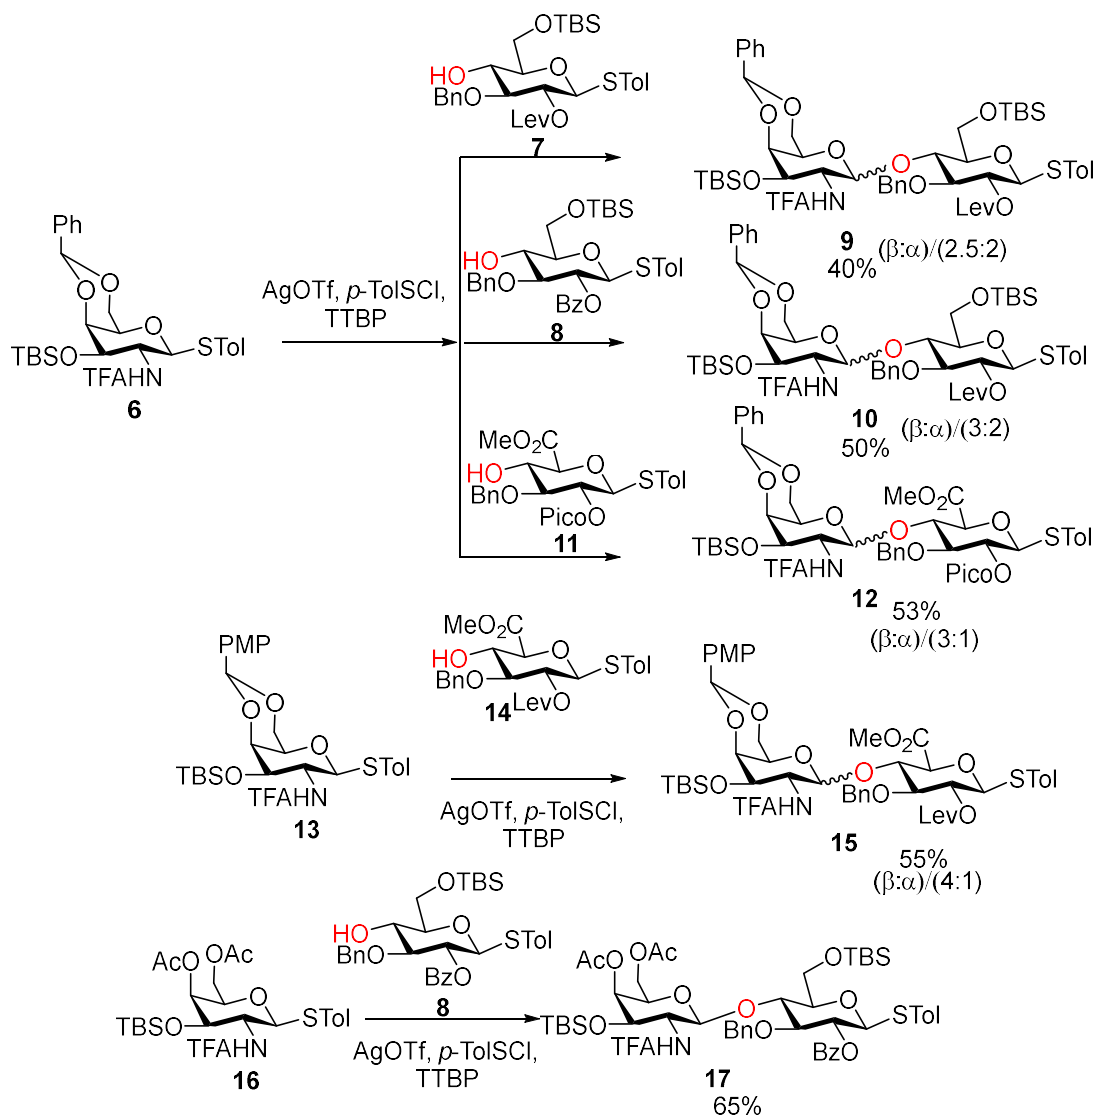

***p*-Tolyl 4,6-*O*-benzylidene-3-*O*-*t*-butyldimethylsilyl-2-deoxy-2-*N*-trifluoroacetamido-β-D-galactopyranoside-(1→4)-3-*O*-benzyl-6-*O*-*t*-butyldimethylsilyl-2-*O*-levulinoyl-1-thio-β-D-glucopyranoside 9:**

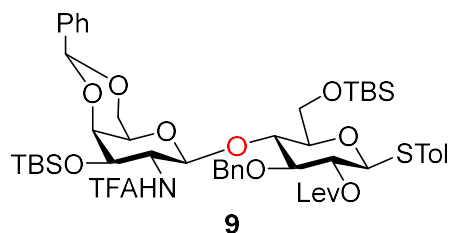

Following the general procedure for pre-activation based single-step glycosylation, disaccharide 9 was obtained (0.96 g, 40%) in (2.5:2) (β:α) ratio, by coupling between donor 6 (2.0 g, 3.4 mmol)

and acceptor **7** (1.35 g, 2.3 mmol). For  $\beta$ -anomer,  $^1\text{H}$  NMR (500 MHz, Chloroform-*d*)  $\delta$  7.43 – 7.40 (m, 2H), 7.38 – 7.36 (m, 2H), 7.29 – 7.25 (m, 5H), 7.23 – 7.19 (m, 3H), 7.09 – 7.06 (m, 2H), 6.37 (d,  $J = 7.8$  Hz, 1H), 5.49 (s, 1H), 5.12 – 5.07 (m, 2H), 4.88 (dd,  $J = 10.0, 8.9$  Hz, 1H), 4.58 (d,  $J = 11.9$  Hz, 1H), 4.50 (d,  $J = 10.0$  Hz, 1H), 4.34 (dd,  $J = 10.6, 3.6$  Hz, 1H), 4.29 (dd,  $J = 12.4, 1.5$  Hz, 1H), 4.08 – 4.05 (m, 2H), 3.96 (dd,  $J = 12.4, 1.8$  Hz, 1H), 3.87 – 3.78 (m, 3H), 3.70 (dd,  $J = 12.0, 3.4$  Hz, 1H), 3.64 (t,  $J = 8.8$  Hz, 1H), 3.33 (q,  $J = 1.5$  Hz, 1H), 3.24 (ddd,  $J = 9.6, 3.4, 1.6$  Hz, 1H), 2.69 – 2.60 (m, 2H), 2.57 – 2.50 (m, 2H), 2.32 (s, 3H), 2.15 (s, 3H), 0.92 (s, 9H), 0.87 (s, 9H), 0.12 (d,  $J = 4.1$  Hz, 6H), 0.09 (s, 3H), 0.04 (s, 3H).  $^{13}\text{C}$  NMR (126 MHz, Chloroform-*d*)  $\delta$  206.39, 171.27, 138.97, 138.08, 137.76, 133.44, 129.55, 129.36, 128.72, 128.66, 128.51, 128.06, 128.05, 128.01, 127.59, 127.17, 126.11, 116.73, 100.73, 98.52, 86.20, 82.41, 79.78, 75.70, 75.48, 74.87, 71.67, 69.54, 68.91, 66.46, 61.64, 56.08, 37.93, 29.90, 29.71, 28.13, 25.99, 25.88, 25.80, 25.72, 25.49, 25.23, 21.16, 18.25, 18.00, -4.55, -4.93, -5.03, -5.36. ESI-MS:  $\text{C}_{52}\text{H}_{72}\text{F}_3\text{NO}_{12}\text{SSi}_2$   $[\text{M}+\text{Na}]^+$  calcd: 1070.4158, obsd: 1070.4101.

***p*-Tolyl 4,6-*O*-benzylidene-3-*O*-*t*-butyldimethylsilyl-2-deoxy-2-*N*-trifluoroacetamido- $\beta$ -D-galactopyranoside-(1 $\rightarrow$ 4)-3-*O*-benzyl-2-*O*-benzoyl-6-*O*-*t*-butyldimethylsilyl-1-thio- $\beta$ -D-glucopyranoside **10**:**

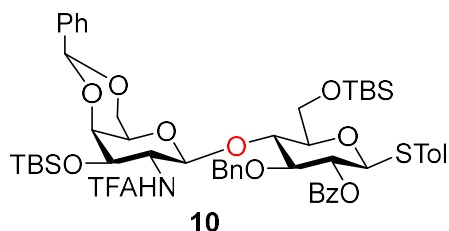

Following the general procedure for pre-activation based single-step glycosylation, disaccharide **10** was obtained (1.2 g, 50%) in (3:2) ( $\beta$ : $\alpha$ ) ratio, by coupling between donor **6** (2.0 g, 3.4 mmol) and acceptor **8** (1.36 g, 2.3 mmol). For  $\beta$ -anomer,  $^1\text{H}$  NMR (500 MHz, Chloroform-*d*)  $\delta$  8.01 – 7.97 (m, 2H), 7.60 – 7.56 (m, 1H), 7.47 – 7.42 (m, 4H), 7.39 – 7.34 (m, 3H), 7.29 – 7.26 (m, 3H), 7.12 – 7.04 (m, 4H), 6.98 (dd,  $J = 8.2, 6.9$  Hz, 1H), 6.92 – 6.89 (m, 1H), 6.35 (d,  $J = 7.9$  Hz, 1H), 5.51 (s, 1H), 5.15 (dd,  $J = 10.1, 9.0$  Hz, 1H), 5.10 (d,  $J = 8.4$  Hz, 1H), 5.05 (d,  $J = 11.6$  Hz, 1H), 4.69 – 4.63 (m, 2H), 4.59 (d,  $J = 11.7$  Hz, 1H), 4.36 – 4.29 (m, 2H), 4.17 – 4.13 (m, 1H), 4.10 – 4.06 (m, 1H), 4.01 – 3.95 (m, 1H), 3.90 (dd,  $J = 12.0, 1.5$  Hz, 1H), 3.88 – 3.85 (m, 1H), 3.79 (d,  $J = 8.9$  Hz, 1H), 3.74 (dd,  $J = 12.0, 3.4$  Hz, 1H), 3.35 – 3.29 (m, 2H), 2.31 (s, 3H), 0.94 (s, 9H), 0.88 (s, 9H), 0.15 (d,  $J = 6.3$  Hz, 6H), 0.10 (s, 3H), 0.05 (s, 3H).  $^{13}\text{C}$  NMR (126 MHz, Chloroform-*d*)  $\delta$

165.09, 138.43, 138.08, 137.81, 133.59, 132.95, 130.13, 129.85, 129.79, 129.72, 129.52, 128.71, 128.65, 128.51, 128.36, 128.27, 128.22, 128.14, 128.04, 128.02, 127.84, 127.56, 127.01, 126.15, 126.12, 100.74, 98.72, 86.39, 82.33, 79.88, 75.71, 74.94, 72.16, 69.74, 68.92, 66.54, 61.68, 56.00, 25.92, 25.90, 25.82, 25.54, 25.50, 25.47, 25.42, 21.15, 18.27, 18.01, -4.92, -4.97, -5.34. ESI-MS: C<sub>54</sub>H<sub>70</sub>F<sub>3</sub>NO<sub>11</sub>SSi<sub>2</sub> [M+NH<sub>4</sub>]<sup>+</sup> calcd: 1071.4498, obsd: 1071.4471.

**Methyl (*p*-tolyl [3-*O*-Acetyl-4,6-*O*-benzylidene-2-deoxy-2-*N*-trifluoroacetamido- $\beta$ -D-galactopyranoside]-(1 $\rightarrow$ 4)-3-*O*-benzyl-2-*O*-picolinoyl-1-thio- $\beta$ -D-glucopyranosyluronate)**

**S23:**

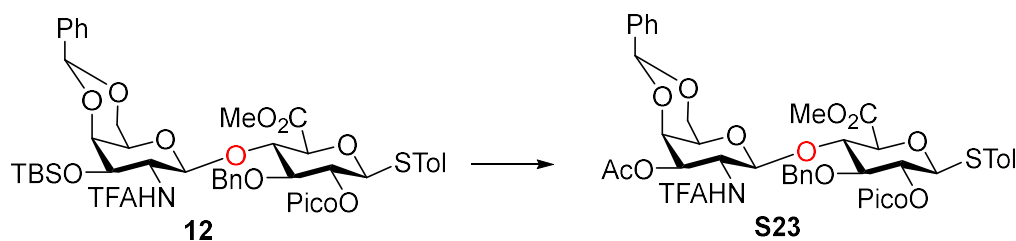

Following the general procedure for pre-activation based single-step glycosylation, disaccharide **12** was obtained (0.39 g, 53%) in (3:1) ( $\beta$ : $\alpha$ ) ratio, by coupling between donor **6** (0.33 g, 0.56 mmol) and acceptor **11** (0.21 g, 0.4 mmol). Then, compound **12** (0.2 g, 0.21 mmol) was subjected to the general procedure for TBS deprotection, and the resulting crude was dissolved in a mixture of pyridine/Ac<sub>2</sub>O (4:2, 6 mL). The mixture was stirred at rt till the reaction was completed. The mixture was diluted with EtOAc (30 mL), washed with 1M HCl, saturated NaHCO<sub>3</sub>, and brine solutions. The organic layer was dried over Na<sub>2</sub>SO<sub>4</sub>, concentrated and purified using silica gel chromatography to afford disaccharide **S23** (0.16 g, 89% over 2 steps). <sup>1</sup>H NMR (500 MHz, Chloroform-*d*)  $\delta$  8.71 (dt, *J* = 4.6, 1.3 Hz, 1H), 8.15 – 8.11 (m, 1H), 7.86 (td, *J* = 7.7, 1.6 Hz, 1H), 7.52 – 7.49 (m, 3H), 7.40 – 7.34 (m, 5H), 7.16 – 7.07 (m, 7H), 6.97 (d, *J* = 9.7 Hz, 1H), 5.53 (s, 1H), 5.42 (dd, *J* = 9.2, 8.2 Hz, 1H), 5.39 (d, *J* = 3.5 Hz, 1H), 5.14 (dd, *J* = 11.3, 3.2 Hz, 1H), 4.93 (d, *J* = 9.3 Hz, 1H), 4.79 (ddd, *J* = 11.3, 9.7, 3.5 Hz, 1H), 4.72 (d, *J* = 11.4 Hz, 1H), 4.64 (d, *J* = 11.3 Hz, 1H), 4.37 (dd, *J* = 3.2, 1.2 Hz, 1H), 4.27 – 4.22 (m, 2H), 4.05 – 4.00 (m, 3H), 3.82 (s, 3H), 3.70 (d, *J* = 1.7 Hz, 1H), 2.33 (s, 3H), 2.08 (s, 3H). <sup>13</sup>C NMR (126 MHz, Chloroform-*d*)  $\delta$  171.31, 167.96, 163.72, 157.31, 157.01, 149.63, 147.11, 138.56, 137.18, 136.44, 133.37, 129.70, 129.13, 128.36, 128.24, 127.88, 127.60, 127.35, 126.20, 126.00, 100.79, 98.61, 87.04, 81.89, 78.16, 75.70, 74.50, 73.02, 72.78, 69.00, 68.66, 63.51, 52.91, 48.21, 29.71, 21.18, 20.82. ESI-MS: C<sub>44</sub>H<sub>43</sub>F<sub>3</sub>N<sub>2</sub>O<sub>13</sub>S [M+NH<sub>4</sub>]<sup>+</sup> calcd: 914.2776, obsd: 914.2706.



**Methyl (*p*-tolyl [4,6-*O*-(4-methoxy)benzylidene-3-*O*-*t*-butyldimethylsilyl-2-deoxy-2-*N*-trifluoroacetamido- $\alpha$ -D-galactopyranoside]-(1 $\rightarrow$ 4)-3-*O*-benzyl-2-*O*-levulinoyl-1-thio- $\beta$ -D-glucopyranosyluronate) 15:**

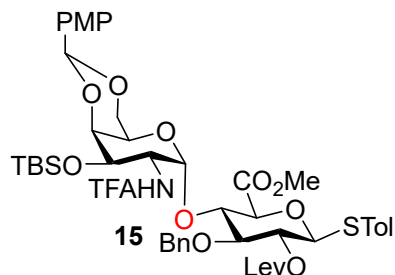

Following the general procedure for pre-activation based single-step glycosylation, disaccharide **15** was obtained (1.33 g, 55 %) in (4:1) ( $\beta$ : $\alpha$ ) ratio, by coupling between donor **13** (2.9 g, 4.8 mmol) and acceptor **14** (1.2 g, 2.4 mmol). For  $\alpha$ -anomer,  $^1\text{H}$  NMR (500 MHz, Chloroform-*d*)  $\delta$  7.43 – 7.41 (m, 2H), 7.38 – 7.35 (m, 2H), 7.33 – 7.29 (m, 2H), 7.21 – 7.18 (m, 2H), 7.13 – 7.11 (m, 2H), 6.89 – 6.86 (m, 2H), 6.59 (d,  $J$  = 9.5 Hz, 1H), 5.44 (s, 1H), 5.39 (d,  $J$  = 3.6 Hz, 1H), 5.06 (dd,  $J$  = 9.6, 8.1 Hz, 1H), 4.67 – 4.61 (m, 3H), 4.58 (td,  $J$  = 10.0, 3.7 Hz, 1H), 4.20 – 4.16 (m, 2H), 4.05 – 4.02 (m, 2H), 3.98 – 3.93 (m, 2H), 3.79 (s, 3H), 3.78 (s, 3H), 3.75 (d,  $J$  = 8.2 Hz, 1H), 3.54 (d,  $J$  = 1.5 Hz, 1H), 2.69 – 2.66 (m, 2H), 2.53 (dt,  $J$  = 17.2, 6.4 Hz, 1H), 2.39 – 2.35 (m, 1H), 2.34 (s, 3H), 2.15 (s, 3H), 0.82 (s, 9H), 0.03 (d,  $J$  = 8.2 Hz, 6H).  $^{13}\text{C}$  NMR (126 MHz, Chloroform-*d*)  $\delta$  206.28, 171.31, 168.05, 159.97, 157.05, 156.75, 138.53, 136.90, 133.01, 129.93, 129.76, 128.56, 128.49, 127.85, 127.43, 127.28, 116.89, 113.49, 100.73, 98.60, 87.08, 82.28, 78.25, 77.26, 75.75, 75.27, 73.78, 71.58, 69.05, 68.45, 63.77, 55.27, 52.82, 50.31, 37.81, 29.74, 27.97, 25.51, 25.41, 21.18, 17.92, -4.18, -4.79. ESI-MS:  $\text{C}_{48}\text{H}_{60}\text{F}_3\text{NO}_{14}\text{SSi}$  [ $\text{M}+\text{NH}_4$ ] $^+$  calcd: 1009.3794, obsd: 1009.3801.

***p*-Tolyl 4,6-di-*O*-acetyl-3-*O*-*t*-butyldimethylsilyl-2-deoxy-2-*N*-trifluoroacetamido- $\beta$ -D-galactopyranoside-(1 $\rightarrow$ 4)-3-*O*-benzyl-2-*O*-benzoyl-6-*O*-*t*-butyldimethylsilyl-1-thio- $\beta$ -D-glucopyranoside 17:**

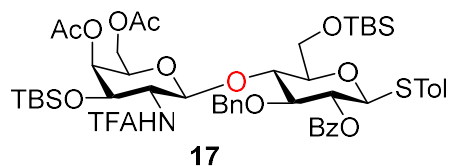

Following the general procedure for pre-activation based single-step glycosylation, disaccharide **17** was obtained (0.22 g, 50 %), by coupling between donor **16** (0.37 g, 0.64 mmol) and acceptor **8** (0.25 g, 0.43 mmol). <sup>1</sup>H NMR (500 MHz, Chloroform-*d*) δ 8.01 – 7.96 (m, 2H), 7.60 – 7.55 (m, 1H), 7.46 – 7.42 (m, 2H), 7.36 – 7.32 (m, 2H), 7.17 – 7.13 (m, 2H), 7.12 – 7.03 (m, 5H), 6.29 (d, *J* = 8.6 Hz, 1H), 5.22 (dd, *J* = 3.5, 1.0 Hz, 1H), 5.12 (dd, *J* = 10.0, 8.9 Hz, 1H), 4.99 (d, *J* = 8.4 Hz, 1H), 4.86 (d, *J* = 11.2 Hz, 1H), 4.67 (d, *J* = 10.0 Hz, 1H), 4.56 (d, *J* = 11.2 Hz, 1H), 4.12 – 4.03 (m, 3H), 3.90 (dd, *J* = 12.1, 1.5 Hz, 1H), 3.85 – 3.69 (m, 5H), 3.30 (ddd, *J* = 9.6, 3.2, 1.5 Hz, 1H), 2.31 (s, 3H), 2.04 (s, 3H), 2.01 (s, 3H), 0.95 (s, 9H), 0.81 (s, 9H), 0.15 (d, *J* = 8.3 Hz, 6H), 0.09 (s, 3H), 0.01 (s, 3H). <sup>13</sup>C NMR (126 MHz, Chloroform-*d*) δ 170.42, 169.83, 165.05, 157.25, 156.96, 138.29, 138.15, 133.53, 133.04, 129.98, 129.81, 129.71, 129.54, 128.70, 128.32, 127.99, 127.80, 127.33, 116.76, 114.46, 98.65, 86.56, 81.61, 79.81, 75.18, 74.40, 72.09, 70.93, 69.33, 68.72, 61.67, 61.65, 56.05, 25.92, 25.34, 21.14, 20.72, 20.67, 18.24, 17.59, -4.65, -4.89, -5.37, -5.41. ESI-MS: C<sub>51</sub>H<sub>70</sub>F<sub>3</sub>NO<sub>13</sub>SSi<sub>2</sub> [M+Na]<sup>+</sup> calcd: 1072.4, obsd: 1072.4.

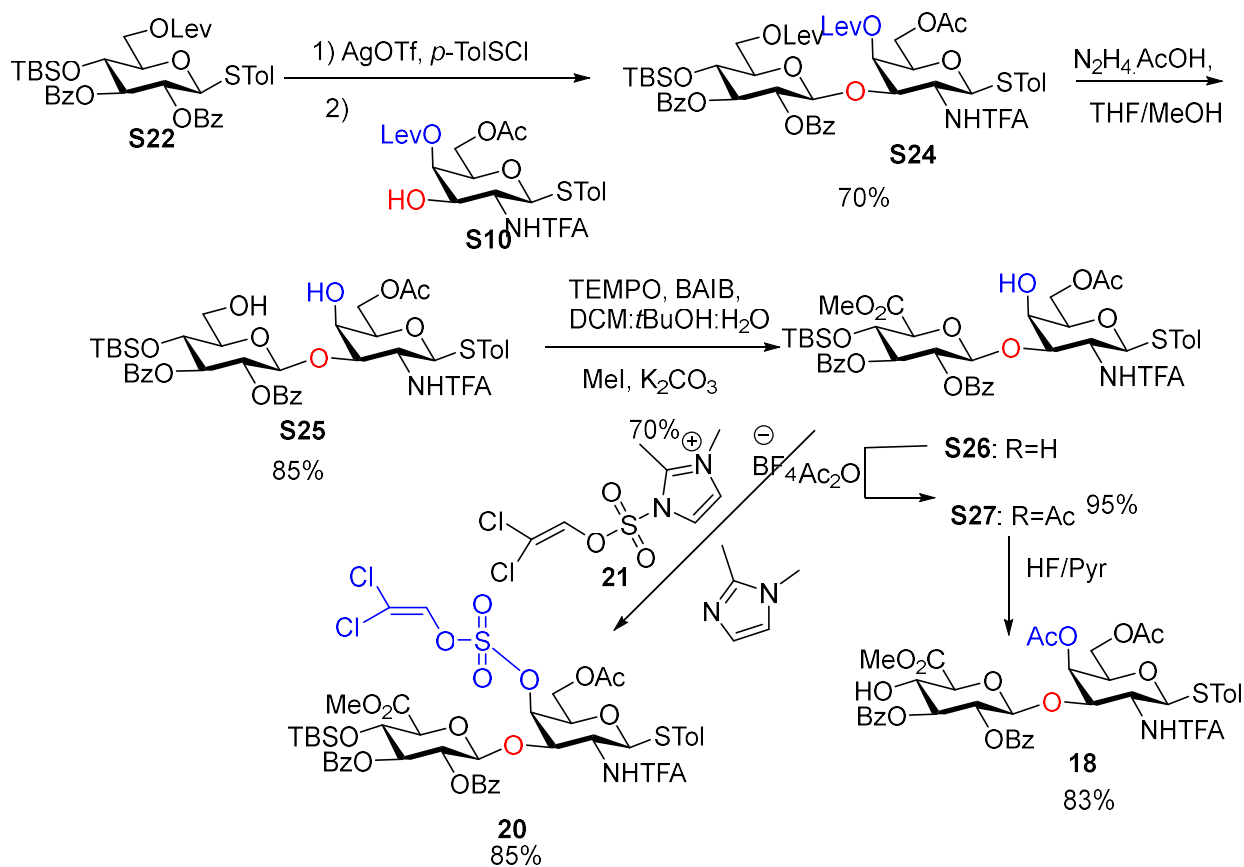

***p*-Tolyl 2,3-di-*O*-benzoyl-4-*O*-*t*-butyldimethylsilyl-6-*O*-levulinoyl- $\beta$ -D-glucopyranosyl-(1 $\rightarrow$ 3)-6-*O*-acetyl-2-deoxy-4-*O*-levulinoyl-2-*N*-trifluoroacetamido-1-thio- $\beta$ -D-galactopyranoside **S24**:**

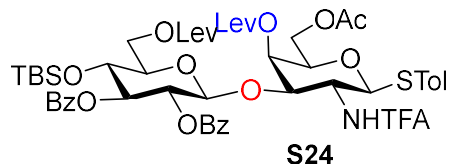

Following the general procedure for pre-activation based single-step glycosylation, disaccharide **S24** was obtained (3.05 g, 70 %), by coupling between donor **S22** (3.34 g, 4.7 mmol) and acceptor **S10** (2.06 g, 3.9 mmol).  $^1\text{H}$  NMR (500 MHz, Chloroform-*d*)  $\delta$  7.84 – 7.80 (m, 2H), 7.76 – 7.71 (m, 2H), 7.61 (d,  $J$  = 9.3 Hz, 1H), 7.45 – 7.40 (m, 2H), 7.36 – 7.33 (m, 2H), 7.33 – 7.27 (m, 4H), 7.06 – 7.02 (m, 2H), 5.47 – 5.41 (m, 2H), 5.16 (dd,  $J$  = 9.9, 7.9 Hz, 1H), 4.79 (d,  $J$  = 7.9 Hz, 1H), 4.67 – 4.62 (m, 2H), 4.48 (dd,  $J$  = 10.5, 3.2 Hz, 1H), 4.15 – 4.05 (m, 4H), 3.91 – 3.85 (m, 2H), 3.64 (ddd,  $J$  = 9.2, 6.7, 2.2 Hz, 1H), 2.94 (ddd,  $J$  = 18.6, 9.6, 4.2 Hz, 1H), 2.71 – 2.57 (m, 4H), 2.56 – 2.43 (m, 4H), 2.27 (s, 3H), 2.12 (s, 3H), 2.04 (s, 3H), 2.03 (s, 3H), 0.74 (s, 9H), 0.02 (s, 3H), -0.24 (s, 3H).  $^{13}\text{C}$  NMR (126 MHz, Chloroform-*d*)  $\delta$  209.66, 206.54, 172.08, 171.55, 170.61, 165.54, 165.19, 157.16, 156.87, 138.30, 133.24, 133.06, 133.02, 129.63, 129.52, 129.47, 129.01, 128.82, 128.30, 128.24, 128.11, 116.91, 114.62, 99.79, 86.59, 77.32, 75.50, 74.96, 74.70, 73.02, 72.10, 69.68, 69.39, 62.73, 62.58, 51.27, 38.13, 38.02, 29.72, 29.66, 29.61, 27.99, 25.52, 25.49, 21.09, 20.76, 17.78, 17.76, -4.21, -4.74. ESI-MS:  $\text{C}_{53}\text{H}_{64}\text{F}_3\text{NO}_{17}\text{SSi}$   $[\text{M}+\text{NH}_4]^+$  calcd: 1121.3955, obsd: 1121.3999.

***p*-Tolyl 2,3-di-*O*-benzoyl-4-*O*-*t*-butyldimethylsilyl- $\beta$ -D-glucopyranosyl-(1 $\rightarrow$ 3)-6-*O*-acetyl-2-deoxy-2-*N*-trifluoroacetamido-1-thio- $\beta$ -D-galactopyranoside **S25**:**

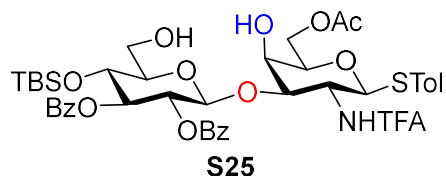

Compound **S24** (3.27 g, 2.96 mmol) was dissolved in THF/MeOH (10:1, 15 mL), then hydrazine acetate (1.64 g, 17.8 mmol) was added at 0 °C. The reaction was stirred for 5 h at rt. Upon completion, the mixture was cooled down to 0 °C, and quenched with acetone, concentrated under vacuo, diluted with ethyl acetate (50 mL), washed with saturated  $\text{NaHCO}_3$ , and brine. The organic

layer was concentrated and the residue was purified with silica gel chromatography (Hex:EtOAc, 3:1) to afford **S25** (2.28 g, 85%) as a white powder.  $^1\text{H}$  NMR (500 MHz, Chloroform-*d*)  $\delta$  7.85 – 7.81 (m, 2H), 7.71 – 7.67 (m, 2H), 7.45 – 7.36 (m, 5H), 7.26 – 7.20 (m, 4H), 7.08 – 7.03 (m, 2H), 5.61 (dd,  $J = 10.1, 9.0$  Hz, 1H), 5.42 – 5.36 (m, 2H), 5.00 (d,  $J = 7.9$  Hz, 1H), 4.56 (dd,  $J = 10.4, 3.1$  Hz, 1H), 4.40 – 4.34 (m, 2H), 4.29 – 4.23 (m, 2H), 3.98 – 3.82 (m, 6H), 3.65 – 3.61 (m, 1H), 3.39 (dd,  $J = 8.2, 4.2$  Hz, 1H), 2.29 (s, 3H), 1.98 (s, 3H), 0.75 (s, 9H), 0.11 (s, 3H), -0.20 (s, 3H).  $^{13}\text{C}$  NMR (126 MHz, Chloroform-*d*)  $\delta$  171.24, 165.81, 165.75, 157.78, 157.48, 138.14, 133.29, 132.99, 132.95, 129.81, 129.70, 129.62, 129.35, 129.20, 128.19, 128.13, 128.10, 116.33, 114.03, 101.44, 85.10, 78.91, 75.83, 75.59, 72.30, 68.53, 68.11, 63.81, 60.74, 52.99, 25.65, 25.59, 21.11, 20.73, 17.79, -4.16, -4.85. ESI-MS:  $\text{C}_{43}\text{H}_{52}\text{F}_3\text{NO}_{13}\text{SSi}$   $[\text{M}+\text{NH}_4]^+$  calcd: 925.3219, obsd: 925.3202.

***p*-Tolyl methyl-2,3-di-*O*-benzoyl-4-*O*-*t*-butyldimethylsilyl-*O*- $\beta$ -D-glucopyranosyluronate-(1 $\rightarrow$ 3)-6-*O*-acetyl-2-deoxy-2-*N*-trifluoroacetamido-1-thio- $\beta$ -D-galactopyranoside **S26**:**

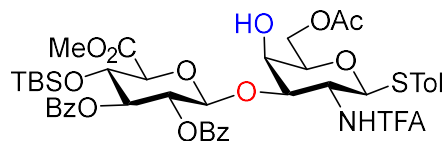

**S26**

To a solution of **S25** (2.4 g, 2.6 mmol) in DCM/*t*BuOH/ $\text{H}_2\text{O}$  (4:1:1, 18 mL), TEMPO (0.123 g, 0.8 mmol) and BAIB (1.87 g, 5.8 mmol) were added. The reaction was stirred for 5 h till oxidation of **17** was completed (monitored by TLC). Then the reaction was quenched with brine (5 mL) and extracted with DCM (3\*15 mL). The organic layers were combined and dried over  $\text{Na}_2\text{SO}_4$  and concentrated under vacuo. The residue was then dissolved in dry DMF (6 mL) and methyl iodide (0.7 mL, 13.8 mmol) and  $\text{K}_2\text{CO}_3$  (1.4 g, 10.1 mmol) were added. The mixture was stirred overnight, then diluted with EtOAc (50 mL), washed with saturated  $\text{NaHCO}_3$ , brine, dried over  $\text{Na}_2\text{SO}_4$ , and concentrated. The residue was purified using column chromatography (Hex:EtOAc, 5:1) to give **S26** (1.73 g, 70% in 2 steps).  $^1\text{H}$  NMR (500 MHz, Chloroform-*d*)  $\delta$  7.88 – 7.83 (m, 2H), 7.83 – 7.78 (m, 2H), 7.50 – 7.45 (m, 2H), 7.37 – 7.29 (m, 6H), 7.10 – 7.05 (m, 2H), 6.47 (d,  $J = 7.3$  Hz, 1H), 5.52 (t,  $J = 8.7$  Hz, 1H), 5.32 (dd,  $J = 8.9, 7.2$  Hz, 1H), 5.14 (d,  $J = 10.3$  Hz, 1H), 4.93 (d,  $J = 7.2$  Hz, 1H), 4.42 – 4.29 (m, 4H), 4.15 – 4.10 (m, 2H), 3.80 (s, 3H), 3.79 – 3.75 (m, 1H), 3.68 – 3.62 (m, 1H), 2.87 (dd,  $J = 3.0, 1.4$  Hz, 1H), 2.32 (s, 3H), 2.06 (s, 3H), 0.73 (s, 9H), -0.04 (s, 3H), -0.19 (s, 3H).  $^{13}\text{C}$  NMR (126 MHz, Chloroform-*d*)  $\delta$  170.88, 168.54, 165.45, 165.20,

157.48, 157.18, 138.44, 133.45, 133.27, 133.14, 129.78, 129.70, 129.68, 129.14, 128.37, 128.34, 128.32, 128.23, 116.21, 113.92, 101.02, 84.41, 78.46, 76.25, 75.70, 74.72, 71.96, 70.32, 67.89, 63.53, 52.80, 52.43, 25.37, 21.15, 20.84, 17.72, -4.44, -5.17. ESI-MS: C<sub>44</sub>H<sub>52</sub>F<sub>3</sub>NO<sub>14</sub>SSi [M+NH<sub>4</sub>]<sup>+</sup> calcd: 953.3168, obsd: 953.3177.

***p*-Tolyl methyl-2,3-di-*O*-benzoyl-4-*O*-*t*-butyldimethylsilyl- $\beta$ -D-glucopyranosyluronate-(1 $\rightarrow$ 3)-4,6-di-*O*-acetyl-2-deoxy-2-*N*-trifluoroacetamido-1-thio- $\beta$ -D-galactopyranoside **S27**:**

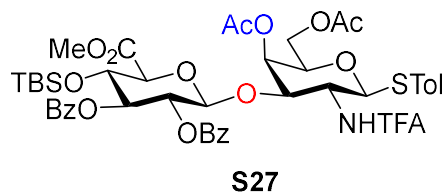

Compound **S26** (1 g, 1 mmol) was dissolved in py./ Ac<sub>2</sub>O (2:1, 6 mL) and the reaction was stirred for 3 h at rt. The mixture was diluted with EtOAc (30 mL), washed with 1M HCl, saturated NaHCO<sub>3</sub>, and brine solutions. The organic layer was dried over Na<sub>2</sub>SO<sub>4</sub>, concentrated and purified using silica gel chromatography (Hex:EtOAc, 5:1) to afford disaccharide **S27** (0.99g, 95%). <sup>1</sup>H NMR (500 MHz, Chloroform-*d*)  $\delta$  7.85 – 7.78 (m, 4H), 7.48 – 7.43 (m, 2H), 7.36 – 7.29 (m, 6H), 7.09 – 7.06 (m, 2H), 6.57 (d, *J* = 7.6 Hz, 1H), 5.50 (dd, *J* = 9.5, 8.8 Hz, 1H), 5.42 (d, *J* = 3.2 Hz, 1H), 5.27 (dd, *J* = 9.5, 7.8 Hz, 1H), 5.12 (d, *J* = 10.4 Hz, 1H), 4.85 (d, *J* = 7.7 Hz, 1H), 4.49 (dd, *J* = 10.4, 3.3 Hz, 1H), 4.26 (t, *J* = 9.0 Hz, 1H), 4.14 (dd, *J* = 11.7, 4.8 Hz, 1H), 4.06 – 3.99 (m, 2H), 3.88 (ddd, *J* = 7.7, 4.8, 1.0 Hz, 1H), 3.81 (s, 3H), 3.71 – 3.64 (m, 1H), 2.32 (s, 3H), 2.05 (s, 3H), 2.03 (s, 3H), 0.71 (s, 9H), -0.05 (s, 3H), -0.21 (s, 3H). <sup>13</sup>C NMR (126 MHz, Chloroform-*d*)  $\delta$  170.61, 169.73, 167.92, 165.47, 165.14, 157.44, 157.14, 138.63, 133.30, 133.25, 133.18, 129.74, 129.66, 129.63, 129.26, 128.61, 128.29, 128.23, 128.07, 116.25, 113.96, 100.44, 84.81, 77.27, 76.40, 75.30, 75.24, 74.96, 71.74, 70.48, 68.54, 62.68, 52.77, 52.62, 25.36, 21.15, 20.72, 20.64, 20.60, 17.70, -4.48, -5.17. ESI-MS: C<sub>46</sub>H<sub>54</sub>F<sub>3</sub>NO<sub>15</sub>SSi [M+NH<sub>4</sub>]<sup>+</sup> calcd: 995.3274, obsd: 995.3245.

***p*-Tolyl methyl-2,3-di-*O*-benzoyl-*O*- $\beta$ -D-glucopyranosyluronate-(1 $\rightarrow$ 3)-4,6-di-*O*-acetyl-2-deoxy-2-*N*-trifluoroacetamido-1-thio- $\beta$ -D-galactopyranoside **18**:**

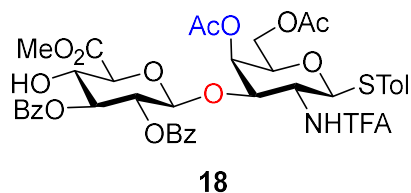

Following the general procedure for TBS removal, disaccharide acceptor **18** was obtained (1.3 g, 83%) from **S27** (1.77 g, 1.7 mmol).  $[\alpha_D^{20}] = +36.5$  (C = 0.2, DCM).  $^1\text{H}$  NMR (500 MHz, Chloroform-*d*)  $\delta$  7.93 – 7.85 (m, 4H), 7.54 – 7.47 (m, 2H), 7.39 – 7.31 (m, 6H), 7.11 – 7.06 (m, 2H), 6.49 (d,  $J = 7.5$  Hz, 1H), 5.55 – 5.47 (m, 2H), 5.33 (dd,  $J = 9.6, 7.6$  Hz, 1H), 5.16 (d,  $J = 10.4$  Hz, 1H), 4.88 (d,  $J = 7.6$  Hz, 1H), 4.59 (dd,  $J = 10.5, 3.3$  Hz, 1H), 4.18 – 4.13 (m, 2H), 4.08 – 4.03 (m, 2H), 3.91 (ddd,  $J = 7.6, 4.8, 1.0$  Hz, 1H), 3.86 (s, 3H), 3.66 (td,  $J = 10.4, 7.3$  Hz, 1H), 3.41 (d,  $J = 3.7$  Hz, 1H), 2.34 (s, 3H), 2.08 (s, 3H), 2.04 (s, 3H).  $^{13}\text{C}$  NMR (126 MHz, Chloroform-*d*)  $\delta$  170.60, 169.79, 168.75, 166.42, 165.15, 157.51, 157.21, 138.69, 133.51, 133.47, 133.24, 129.85, 129.78, 129.67, 128.78, 128.62, 128.41, 128.39, 128.00, 116.28, 113.99, 100.65, 84.67, 75.27, 75.07, 74.73, 74.41, 71.28, 70.16, 68.90, 62.73, 53.04, 53.01, 21.17, 20.74, 20.64. ESI-MS:  $\text{C}_{40}\text{H}_{40}\text{F}_3\text{NO}_{15}\text{S}$   $[\text{M}+\text{NH}_4]^+$  calcd: 881.2409, obsd: 881.2379.

### 1-(2,2-Dichlorovinylloxysulfonyl) 2,3-dimethylimidazolium tetrafluoroborate **S29**<sup>5</sup>:

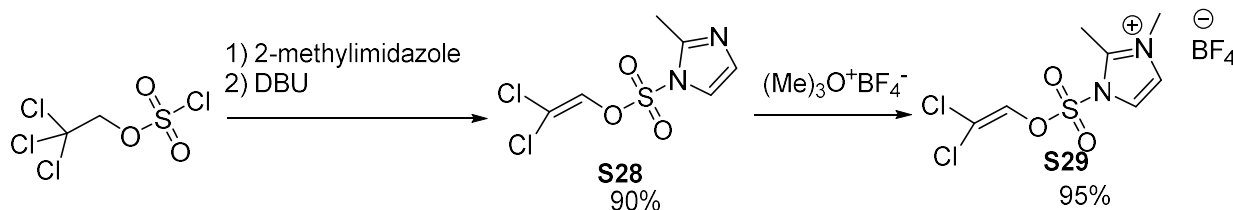

2-Methyl imidazole (6.0 g, 97.4 mmol) was dissolved in dry THF (56 mL). To this solution 2,2,2-trichloroethoxy sulfonylchloride (6.8 g, 27.4 mmol) in dry THF (72 mL) was added at 0 °C. The reaction mixture was stirred for 1 h at 0 °C, and another 1 h at rt, then filtered. To the filtrate, 1,8-diazabicyclo[5.4.0]undec-7-ene (DBU) (6.2 mL, 41.2 mmol, 1.5 equiv.) was added dropwise at 0 °C, and the reaction was stirred at the same temperature for 1 h followed by 2 h at rt. The reaction was filtered, washed with brine, dried over  $\text{Na}_2\text{SO}_4$ , concentrated in *vacuo*. The residue was purified with flash chromatography to afford **S28** in 90% yield. Compound **S28** (7.07 g, 27.5 mmol) was dissolved in DCM (70 mL) and then added to a solution of trimethyloxonium tetrafluoroborate (4.07 g, 27.5 mmol) in DCM (35 mL) at 0 °C. The reaction was stirred overnight at rt, then the solvent was concentrated and triturated with hot THF (10 mL), filtered and concentrated to afford pure compound **29** (9.37 g, 95%). Comparison with literature data<sup>5</sup> confirms its identity.  $^1\text{H}$  NMR (500 MHz, DMSO-*d*<sub>6</sub>)  $\delta$  8.25 (d,  $J = 2.4$  Hz, 1H), 7.95 (d,  $J = 2.4$  Hz, 2H), 3.85 (s, 3H), 2.81 (s, 3H).  $^{13}\text{C}$  NMR (126 MHz, DMSO-*d*<sub>6</sub>)  $\delta$  149.60, 134.53, 124.49, 122.18, 121.39, 36.46, 12.22.  $^{19}\text{F}$  NMR (470 MHz, DMSO-*d*<sub>6</sub>)  $\delta$  -148.34.

***p*-Tolyl methyl-2,3-di-*O*-benzoyl-4-*O*-*t*-butyldimethylsilyl-*O*- $\beta$ -D-glucopyranosyluronate-(1 $\rightarrow$ 3)-6-*O*-acetyl-4-*O*-dichlorovinyl sulfate-2-deoxy-2-*N*-trifluoroacetamido-1-thio- $\beta$ -D-galactopyranoside **20**:**

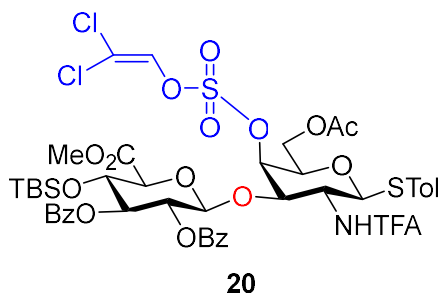

To a solution of disaccharide **S26** (0.6 g, 0.64 mmol) in DCM (10 mL), 1,2-dimethylimidazole (0.57 mL, 6.4 mmol) followed by dropwise addition of the DCV reagent **S29** (2.3 g, 6.4 mmol). The reaction mixture was stirred at rt for 4 h, then at 50 °C for 8 h. The reaction mixture was diluted with another 20 mL of DCM, washed with brine and H<sub>2</sub>O, then dried over Na<sub>2</sub>SO<sub>4</sub> and concentrated. The residue was purified using flash chromatography (EtOAc:Hex., 3:1) to give pure compound **20** (0.6 g, 85%). <sup>1</sup>H NMR (500 MHz, Chloroform-*d*)  $\delta$  7.87 – 7.79 (m, 4H), 7.49 – 7.44 (m, 2H), 7.35 – 7.29 (m, 6H), 7.26 (s, 1H), 7.12 – 7.09 (m, 2H), 6.68 (d, *J* = 7.3 Hz, 1H), 5.57 (t, *J* = 9.1 Hz, 1H), 5.35 – 5.30 (m, 2H), 5.16 (d, *J* = 10.3 Hz, 1H), 4.93 (d, *J* = 7.7 Hz, 1H), 4.71 (dd, *J* = 10.7, 2.9 Hz, 1H), 4.31 – 4.21 (m, 3H), 4.12 (d, *J* = 9.1 Hz, 1H), 3.95 (t, *J* = 6.5 Hz, 1H), 3.80 (s, 3H), 3.59 – 3.52 (m, 1H), 2.33 (s, 3H), 2.06 (s, 3H), 0.73 (s, 9H), -0.04 (s, 3H), -0.19 (s, 3H). <sup>13</sup>C NMR (126 MHz, Chloroform-*d*)  $\delta$  170.49, 167.78, 165.42, 165.08, 157.72, 157.42, 139.10, 134.23, 133.56, 133.40, 133.27, 129.97, 129.72, 129.65, 129.15, 128.47, 128.35, 128.27, 127.14, 117.40, 116.14, 113.84, 101.70, 84.62, 82.91, 77.29, 76.45, 74.69, 74.60, 74.37, 71.64, 70.33, 61.76, 52.64, 52.50, 25.36, 21.18, 20.58, 17.71, -4.44, -5.11. ESI-MS: C<sub>46</sub>H<sub>52</sub>Cl<sub>2</sub>F<sub>3</sub>NO<sub>17</sub>S<sub>2</sub>Si [M+Na]<sup>+</sup> calcd: 1127.2, obsd: 1127.2.

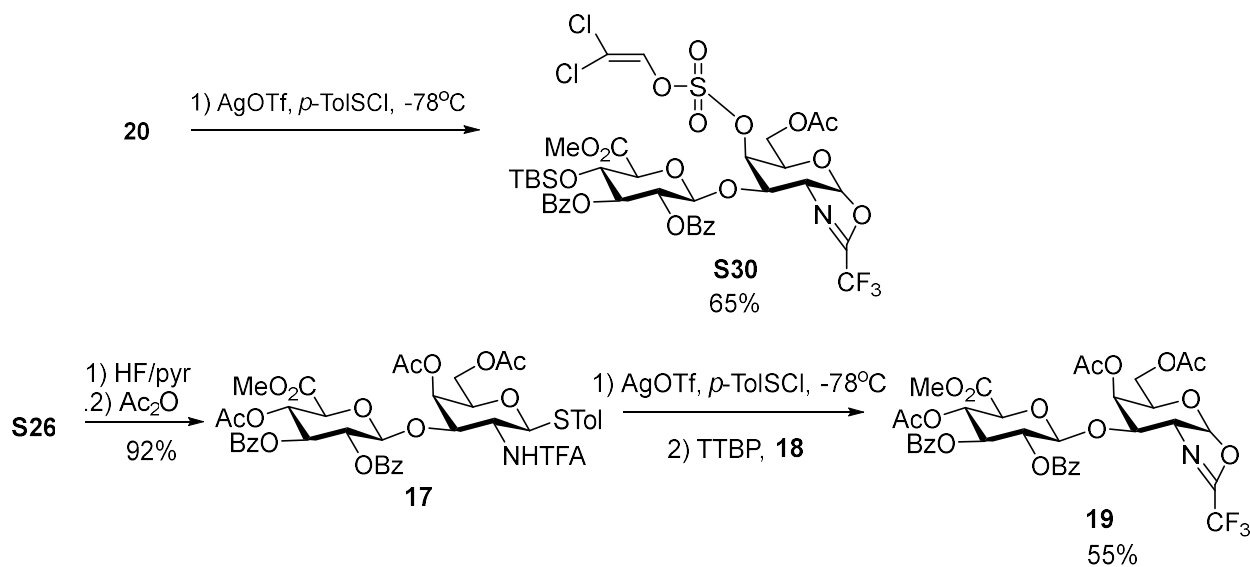

**2-Trifluoromethyl-[methyl-2,3-di-*O*-benzoyl-4-*O*-*t*-butyldimethylsilyl-*O*- $\beta$ -D-glucopyranosyluronate-(1 $\rightarrow$ 3)-6-*O*-acetyl-4-*O*-dichlorovinyl sulfate-2-deoxy- $\alpha$ -D-galactopyranose]-[2,1-d]-oxazoline **S30**:**

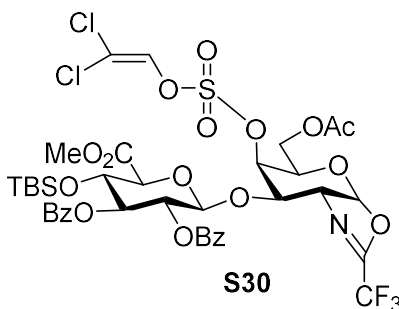

Glycosylation reaction between donor **20** (0.086 g, 0.77  $\mu$ mol) and acceptor **18** (0.056 g, 0.64  $\mu$ mol) was performed following the general procedure for pre-activation based single-step glycosylation. No glycosylation product was obtained and oxazoline **S30** was isolated using flash column chromatography (toluene:acetone, 6:1) (29 mg, 65%). <sup>1</sup>H NMR (500 MHz, Chloroform-*d*)  $\delta$  8.01 – 7.86 (m, 4H), 7.56 – 7.46 (m, 2H), 7.38 (m, 4H), 7.20 (m, 1H), 6.14 (m, 1H), 5.61 (m, 1H), 5.40 – 5.34 (m, 1H), 5.28 – 5.23 (m, 2H), 4.39 (m, 2H), 4.29 – 4.15 (m, 3H), 4.10 – 4.04 (m, 1H), 3.94 (m, 1H), 3.82 (s, 3H), 2.13 (s, 3H), 0.75 (s, 9H), -0.01 (s, 3H), -0.16 (s, 3H). ESI-MS: C<sub>39</sub>H<sub>44</sub>Cl<sub>2</sub>F<sub>3</sub>NO<sub>17</sub>SSi [M+H]<sup>+</sup> calcd: 986.1501, obsd: 986.1378, [M+Na]<sup>+</sup> calcd: 1008.1, obsd: 1008.1.

***p*-Tolyl methyl-4-*O*-acetyl-2,3-di-*O*-benzoyl-*O*- $\beta$ -D-glucopyranosyluronate-(1 $\rightarrow$ 3)-4,6-di-*O*-acetyl-2-deoxy-2-*N*-trifluoroacetamido-1-thio- $\beta$ -D-galactopyranoside **17**:**



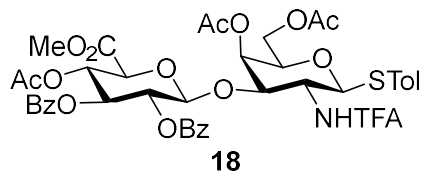

Compound **18** (0.12 g, 0.14 mmol) was dissolved in pyridine/Ac<sub>2</sub>O (2:1, 3 mL). The reaction was stirred for 5 h. The mixture was diluted with ethyl acetate (30 mL), washed with 1M HCl, saturated NaHCO<sub>3</sub>, and brine. The organic layer was dried over Na<sub>2</sub>SO<sub>4</sub>, concentrated and purified using silica gel chromatography (Hex:EtOAc, 3:1) to afford disaccharide **17** (0.12 g, 92%). [ $\alpha_D^{20}$ ] = +50 (C = 0.05, DCM). <sup>1</sup>H NMR (500 MHz, Chloroform-*d*)  $\delta$  7.89 – 7.79 (m, 4H), 7.53 – 7.45 (m, 2H), 7.40 – 7.29 (m, 6H), 7.11 – 7.03 (m, 2H), 6.52 (d, *J* = 7.4 Hz, 1H), 5.62 (t, *J* = 9.5 Hz, 1H), 5.50 (d, *J* = 3.2 Hz, 1H), 5.45 – 5.33 (m, 2H), 5.14 (d, *J* = 10.4 Hz, 1H), 4.88 (d, *J* = 7.7 Hz, 1H), 4.58 (dd, *J* = 10.5, 3.3 Hz, 1H), 4.18 – 4.11 (m, 2H), 4.06 (dd, *J* = 11.6, 7.5 Hz, 1H), 3.91 – 3.86 (m, 1H), 3.78 (s, 3H), 3.66 (td, *J* = 10.4, 7.4 Hz, 1H), 2.33 (s, 3H), 2.07 (s, 3H), 2.04 (s, 3H), 1.93 (s, 3H). <sup>13</sup>C NMR (126 MHz, Chloroform-*d*)  $\delta$  170.55, 169.66, 169.27, 166.77, 165.44, 164.94, 157.52, 157.22, 138.72, 133.50, 133.31, 129.78, 129.76, 129.70, 128.52, 128.50, 128.43, 128.37, 127.90, 116.27, 113.97, 100.17, 84.65, 75.24, 75.06, 72.58, 72.17, 71.33, 69.04, 68.56, 62.57, 52.97, 52.95, 21.16, 20.73, 20.60, 20.42. ESI-MS: C<sub>42</sub>H<sub>42</sub>F<sub>3</sub>NO<sub>16</sub>S [M+NH<sub>4</sub>]<sup>+</sup> calcd: 923.2515, obsd: 923.2543.

**2-Trifluoromethyl-[methyl-4-*O*-acetyl-2,3-di-*O*-benzoyl-*O*- $\beta$ -D-glucopyranosyluronate-(1 $\rightarrow$ 3)-4,6-di-*O*-acetyl-2-deoxy- $\alpha$ -D-galactopyranose]-[2,1-*d*]-oxazoline **19**:**

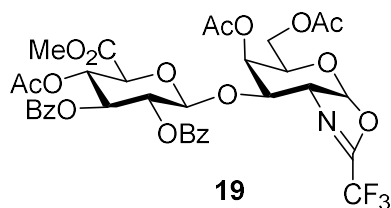

Glycosylation between donor **17** (0.191 g, 0.21  $\mu$ mol) and acceptor **18** (0.140 g, 0.162  $\mu$ mol) was performed following general procedure for pre-activation based single-step glycosylation. No glycosylation product was separated and oxazoline **19** was obtained using flash column chromatography (toluene:acetone, 6:1) (0.06 g, 55%). <sup>1</sup>H NMR (500 MHz, Chloroform-*d*)  $\delta$  8.01 – 7.89 (m, 4H), 7.58 – 7.50 (m, 2H), 7.44 – 7.35 (m, 4H), 6.14 (d, *J* = 6.2 Hz, 1H), 5.75 (t, *J* = 9.4 Hz, 1H), 5.50 – 5.41 (m, 3H), 5.29 (d, *J* = 7.5 Hz, 1H), 4.25 – 4.16 (m, 2H), 4.14 – 4.08 (m, 2H),

4.02 – 3.95 (m, 2H), 3.79 (s, 3H), 2.08 (s, 3H), 1.96 (s, 3H), 1.91 (s, 3H). <sup>13</sup>C NMR (126 MHz, Chloroform-*d*) δ 170.45, 169.37, 169.34, 167.12, 165.52, 164.66, 133.51, 133.47, 129.86, 129.75, 128.97, 128.67, 128.52, 128.47, 105.51, 98.67, 74.91, 72.63, 72.00, 71.51, 70.90, 69.35, 65.34, 64.81, 61.76, 52.94, 20.70, 20.47, 20.19. ESI-MS: C<sub>35</sub>H<sub>34</sub>F<sub>3</sub>NO<sub>16</sub> [M+NH<sub>4</sub>]<sup>+</sup> calcd: 782.1902, obsd: 782.1886.

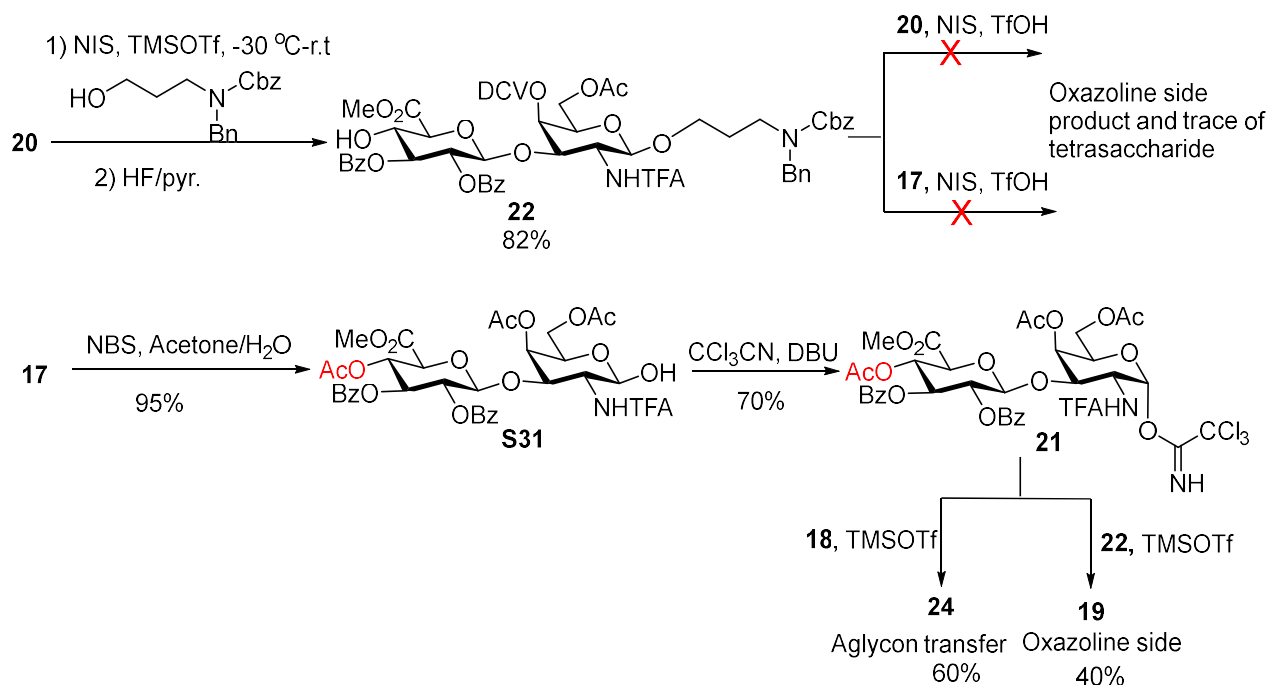

*N*-(Benzyl)-benzyloxycarbonyl-3-aminopropyl glucopyranosyluronate-(1→3)-6-*O*-acetyl-4-*O*-dichlorovinyl-trifluoroacetamido-β-*D*-galactopyranoside **22**:

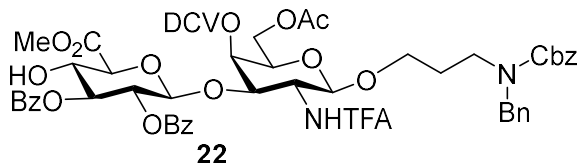

methyl-2,3-di-*O*-benzoyl-*O*-β-*D*-sulfate-2-deoxy-2-*N*-

Following the general procedure for glycosylation catalyzed by NIS/TfOH, coupling between donor **20** (0.051 g, 0.46 μmol) and *N*-(benzyl)-benzyloxycarbonyl-3-aminopropanol (0.021 g, 0.70 μmol) was performed, which was followed by TBS cleavage using the general procedure for TBS removal to afford disaccharide **22** (0.044 g, 82% yield for the 2 steps). <sup>1</sup>H NMR (500 MHz, Chloroform-*d*) δ 7.94 – 7.92 (m, 2H), 7.90 (t, *J* = 7.6 Hz, 2H), 7.66 (d, *J* = 7.2 Hz, 1H), 7.52 – 7.44

(m, 2H), 7.38 – 7.27 (m, 13H), 7.13 (d,  $J = 7.2$  Hz, 1H), 5.56 (t,  $J = 9.3$  Hz, 1H), 5.44 – 5.40 (m, 2H), 5.13 – 5.07 (m, 2H), 4.96 (d,  $J = 7.7$  Hz, 1H), 4.90 – 4.77 (m, 1H), 4.60 – 4.50 (m, 3H), 4.37 (t,  $J = 14.6$  Hz, 1H), 4.29 – 4.24 (m, 2H), 4.23 – 4.10 (m, 3H), 3.89 (s, 3H), 3.85 – 3.79 (m, 2H), 3.70 (dt,  $J = 10.9, 7.7$  Hz, 1H), 3.53 – 3.45 (m, 2H), 3.33 (ddd,  $J = 9.9, 7.7, 4.4$  Hz, 1H), 3.21 – 3.06 (m, 2H), 2.13 (s, 3H), 1.72 – 1.65 (m, 2H).  $^{13}\text{C}$  NMR (126 MHz, Chloroform-*d*)  $\delta$  134.63, 133.36, 133.26, 130.02, 129.82, 126.68, 101.88, 98.96, 82.69, 74.70, 73.94, 70.73, 70.23, 69.73, 67.21, 66.20, 61.74, 52.80, 50.03, 43.05, 27.38, 20.39. ESI-MS:  $\text{C}_{51}\text{H}_{51}\text{Cl}_2\text{F}_3\text{N}_2\text{O}_{20}\text{S}$   $[\text{M}+\text{H}]^+$  calcd: 1171.2, obsd: 1171.2,  $[\text{M}+\text{NH}_4]^+$  calcd: 1188.2, obsd: 1188.2.

**Methyl-4-*O*-acetyl-2,3-di-*O*-benzoyl- $\beta$ -D-glucopyranosyluronate-(1 $\rightarrow$ 3)-4,6-di-*O*-acetyl-2-deoxy-2-*N*-trifluoroacetamido- $\beta$ -D-galactopyranoside **S31**:**

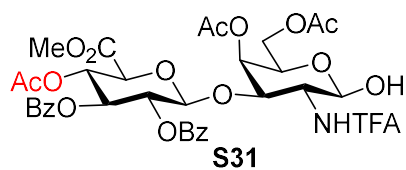

To a solution of thioglycoside **17** (0.034 g, 0.38  $\mu\text{mol}$ ) in acetone/ $\text{H}_2\text{O}$  (15:1, 3 mL) at 0  $^\circ\text{C}$ , *N*-bromosuccinimide (0.01g, 0.85  $\mu\text{mol}$ ) was added. After stirring in ice bath for 1 h, the solvents were evaporated under reduced pressure. The residue was dissolved in ethyl acetate and washed successively with 10%  $\text{Na}_2\text{S}_2\text{O}_3(\text{aq})$  and brine. The organic layer was dried over  $\text{Na}_2\text{SO}_4$ , filtered and concentrated under reduced pressure. The residue was purified by flash column chromatography (Hex:EtOAc., 2:1) to give the hemiacetal **S31** (0.028 g, 95%).  $^1\text{H}$  NMR (500 MHz, Chloroform-*d*)  $\delta$  7.87 – 7.83 (m, 4H), 7.51 – 7.46 (m, 2H), 7.36 – 7.32 (m, 4H), 7.20 (d,  $J = 8.1$  Hz, 1H), 5.67 (t,  $J = 9.6$  Hz, 1H), 5.49 – 5.41 (m, 3H), 5.36 (t,  $J = 3.4$  Hz, 1H), 5.05 (d,  $J = 7.9$  Hz, 1H), 4.49 – 4.35 (m, 4H), 4.23 (d,  $J = 10.0$  Hz, 1H), 4.17 (dd,  $J = 11.5, 5.3$  Hz, 1H), 3.97 (dd,  $J = 11.6, 7.2$  Hz, 1H), 3.78 (s, 3H), 2.08 (s, 3H), 2.05 (s, 3H), 1.94 (s, 3H).  $^{13}\text{C}$  NMR (126 MHz, Chloroform-*d*)  $\delta$  178.07, 170.06, 169.41, 167.19, 133.53, 133.25, 129.79, 129.76, 128.84, 128.44, 128.20, 99.38, 91.27, 72.69, 72.24, 70.96, 70.84, 69.30, 68.65, 67.33, 62.67, 53.09, 50.04, 29.58, 20.77, 20.63, 20.44. ESI-MS:  $\text{C}_{35}\text{H}_{36}\text{F}_3\text{NO}_{17}$   $[\text{M}+\text{NH}_4]^+$  calcd: 817.2274, obsd: 817.2266.

***O*-(Methyl-4-*O*-acetyl-2,3-di-*O*-benzoyl- $\beta$ -D-glucopyranosyluronate-(1 $\rightarrow$ 3)-4,6-di-*O*-acetyl-2-deoxy-2-*N*-trifluoroacetamido- $\alpha$ -D-galactopyranosyl)trichloroacetimidate **21**:**

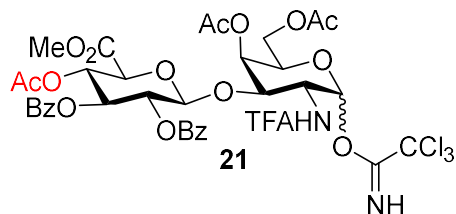

DBU (2.4  $\mu\text{L}$ , 0.16  $\mu\text{mol}$ ) was added to a solution of the hemiacetal **S31** (0.032 g, 0.4  $\mu\text{mol}$ ) and  $\text{CCl}_3\text{CN}$  (0.06 mL, 0.6  $\mu\text{mol}$ ) in DCM (2 mL) at 0  $^\circ\text{C}$  under a nitrogen atmosphere. The reaction was stirred at rt for 10 h, then concentrated under reduced pressure. The crude was purified using flash chromatography (Hex:EtOAc., 2:1) to afford trichloroacetamidate **21** (0.026 g, 70%).  $^1\text{H}$  NMR (500 MHz, Chloroform-*d*)  $\delta$  8.74 (s, 1H), 8.06 – 8.02 (m, 1H), 7.88 (tt,  $J = 8.4, 1.4$  Hz, 4H), 7.57 – 7.50 (m, 3H), 7.43 – 7.34 (m, 6H), 6.87 (d,  $J = 7.1$  Hz, 1H), 6.58 (d,  $J = 3.4$  Hz, 1H), 5.72 (t,  $J = 9.5$  Hz, 1H), 5.62 – 5.60 (m, 1H), 5.48 (dd,  $J = 9.5, 8.0$  Hz, 1H), 5.06 (d,  $J = 8.0$  Hz, 1H), 4.77 – 4.72 (m, 1H), 4.67 – 4.62 (m, 1H), 4.53 – 4.49 (m, 1H), 4.37 – 4.32 (m, 2H), 4.24 (d,  $J = 9.8$  Hz, 1H), 4.19 (dd,  $J = 11.5, 6.1$  Hz, 1H), 4.12 – 4.08 (m, 1H), 3.98 (dd,  $J = 11.5, 6.9$  Hz, 1H), 3.91 – 3.89 (m, 1H), 3.81 (d,  $J = 7.8$  Hz, 1H), 3.77 (s, 3H), 2.07 (s, 3H), 2.03 (s, 3H), 1.99 (s, 1H), 1.97 (s, 3H), 1.95 (s, 1H).  $^{13}\text{C}$  NMR (126 MHz, Chloroform-*d*) from coupled HSQC  $\delta$  133.31, 129.43, 128.02, 98.02, 94.13, 72.87, 71.81, 69.34, 66.52, 63.78, 61.31, 52.93, 49.40, 20.37. ESI-MS:  $\text{C}_{37}\text{H}_{36}\text{Cl}_3\text{F}_3\text{N}_2\text{O}_{17}$   $[\text{M}+\text{H}]^+$  calcd: 943.1, obsd: 943.1.

### 1.10. Chemical synthesis of 24-mer 1:

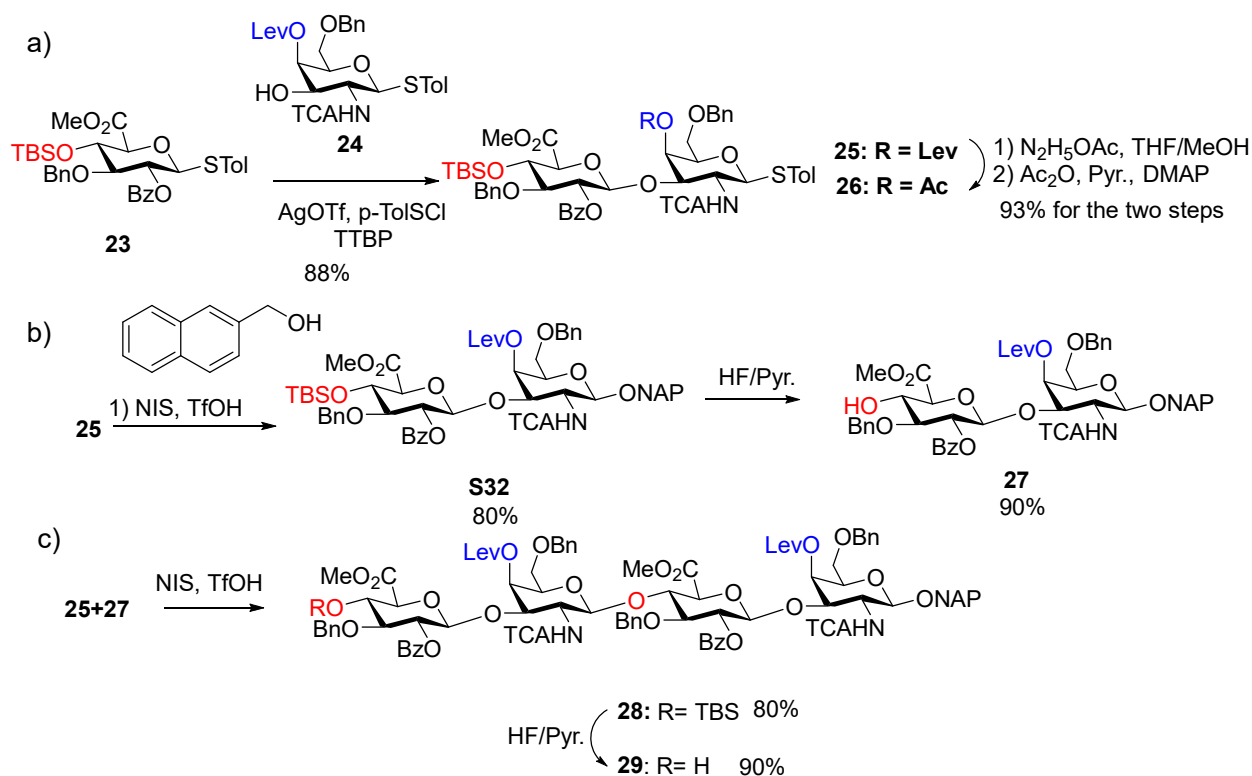

*p*-Tolyl methyl-3-*O*-benzyl-2-*O*-benzoyl-4-*O*-*t*-butyldimethylsilyl-*O*-β-*D*-glucopyranosyluronate-(1→3)-6-*O*-benzyl-4-*O*-levulinoyl-2-deoxy-2-*N*-trichloroacetamido-1-thio-β-*D*-galactopyranoside **25**:

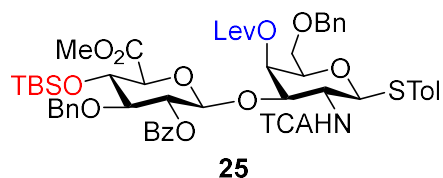

Following the general procedure for pre-activation based single-step glycosylation, coupling between donor **23** (1.32 g, 2.1 mmol) and acceptor **24** (1.01 g, 1.6 mmol) afford the desired disaccharide **25** (1.52 g, 88%).  $[\alpha_D^{20}] = +7.5$  (C = 0.12, DCM).  $^1\text{H NMR}$  (500 MHz, Chloroform-*d*)  $\delta$  7.95 – 7.87 (m, 2H), 7.58 – 7.54 (m, 1H), 7.45 – 7.30 (m, 9H), 7.17 – 7.10 (m, 5H), 7.06 – 7.00 (m, 2H), 6.79 (d,  $J = 7.6$  Hz, 1H), 5.55 (d,  $J = 3.6$  Hz, 1H), 5.23 (t,  $J = 7.2$  Hz, 1H), 5.18 – 5.15 (m, 1H), 4.85 (d,  $J = 6.9$  Hz, 1H), 4.68 – 4.60 (m, 2H), 4.56 (dd,  $J = 10.4, 3.3$  Hz, 1H), 4.49 (s, 2H), 4.14 – 4.09 (m, 2H), 3.96 (d,  $J = 8.9$  Hz, 1H), 3.74 (s, 3H), 3.67 – 3.60 (m, 2H), 3.59 – 3.54 (m, 2H), 2.86 – 2.78 (m, 1H), 2.66 – 2.56 (m, 2H), 2.51 – 2.43 (m, 1H), 2.31 (s, 3H), 2.17 (s,

3H), 0.86 (s, 9H), 0.00 (d,  $J = 1.6$  Hz, 6H).  $^{13}\text{C}$  NMR (126 MHz, Chloroform- $d$ )  $\delta$  206.78, 206.61, 171.44, 171.32, 168.53, 164.88, 161.53, 138.34, 138.07, 137.67, 137.57, 133.38, 133.34, 133.09, 129.79, 129.75, 129.65, 129.62, 129.41, 128.53, 128.48, 128.45, 128.39, 128.33, 128.10, 128.00, 127.96, 127.77, 127.63, 127.62, 127.57, 127.47, 127.43, 107.35, 99.77, 98.69, 92.22, 84.85, 82.43, 82.35, 77.35, 76.95, 76.48, 76.46, 74.87, 74.57, 74.24, 73.68, 73.67, 73.63, 73.58, 73.29, 72.09, 71.87, 71.63, 69.42, 68.89, 68.13, 65.81, 65.19, 60.46, 54.09, 52.36, 38.09, 37.89, 29.85, 29.78, 27.91, 27.49, 25.75, 25.73, 21.18, 17.89, 14.22, -4.03, -4.08, -5.19, -5.23. ESI-MS:  $\text{C}_{54}\text{H}_{64}\text{Cl}_3\text{NO}_{14}\text{SSi}$   $[\text{M}+\text{NH}_4]^+$  calcd: 1133.3221, obsd: 1133.3201.

**2-Naphthylmethyl (methyl 3-*O*-benzyl-2-*O*-benzoyl-*O*- $\beta$ -D-glucopyranosyluronate)-(1 $\rightarrow$ 3)-6-*O*-benzyl-4-*O*-levulinoyl-2-deoxy-2-*N*-trichloroacetamido- $\beta$ -D-galactopyranoside **27**:**

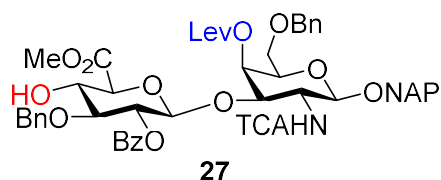

Following the general procedure for glycosylation catalyzed by NIS/TfOH, disaccharide **S32** was synthesized in (0.12 g, 80%) by coupling between donor **25** (0.15 g, 0.13 mmol) and acceptor **24** (0.028 g, 0.18 mmol). Then compound **S32** (122 mg, 0.105 mmol) was subjected to the general procedure for TBS removal to give disaccharide acceptor **27** (0.1 g, 90%).  $[\alpha_{\text{D}}^{20}] = +4.6$  ( $C = 0.13$ , DCM).  $^1\text{H}$  NMR (500 MHz, Chloroform- $d$ )  $\delta$  7.96 – 7.92 (m, 2H), 7.83 – 7.68 (m, 5H), 7.60 – 7.56 (m, 1H), 7.48 – 7.41 (m, 4H), 7.40 – 7.35 (m, 5H), 7.33 – 7.29 (m, 1H), 7.18 – 7.11 (m, 5H), 6.77 (d,  $J = 7.0$  Hz, 1H), 5.59 (dd,  $J = 3.5, 0.9$  Hz, 1H), 5.14 (dd,  $J = 9.3, 7.5$  Hz, 1H), 5.04 (d,  $J = 8.3$  Hz, 1H), 5.01 (d,  $J = 11.7$  Hz, 1H), 4.78 – 4.66 (m, 5H), 4.59 – 4.52 (m, 2H), 4.06 (ddd,  $J = 9.8, 8.7, 2.5$  Hz, 1H), 3.88 – 3.83 (m, 2H), 3.75 (s, 3H), 3.68 – 3.58 (m, 3H), 3.53 (ddd,  $J = 10.9, 8.3, 7.0$  Hz, 1H), 3.31 (d,  $J = 2.8$  Hz, 1H), 2.90 (dt,  $J = 17.9, 7.2$  Hz, 1H), 2.78 – 2.66 (m, 2H), 2.60 (ddd,  $J = 16.8, 6.9, 5.6$  Hz, 1H), 2.21 (s, 3H).  $^{13}\text{C}$  NMR (126 MHz, Chloroform- $d$ )  $\delta$  206.92, 171.70, 169.65, 164.90, 161.93, 138.00, 137.74, 133.90, 133.38, 133.14, 133.10, 129.86, 129.45, 128.50, 128.42, 128.34, 128.26, 128.10, 127.97, 127.91, 127.76, 127.70, 127.67, 127.33, 126.19, 126.13, 126.01, 100.65, 97.26, 92.11, 80.19, 77.28, 74.37, 73.87, 73.71, 72.95, 72.71, 72.43, 72.00, 71.34, 69.67, 68.70, 56.64, 52.82, 38.18, 29.88, 28.00. ESI-MS:  $\text{C}_{48}\text{H}_{50}\text{Cl}_3\text{NO}_{14}\text{S}$   $[\text{M}+\text{H}]^+$  calcd: 1002.2090, obsd: 1002.2065,  $[\text{M}+\text{NH}_4]^+$  calcd: 1019.2356, obsd: 1019.2306.

***p*-Tolyl methyl-3-*O*-benzyl-2-*O*-benzoyl-4-*O*-*t*-butyldimethylsilyl- $\beta$ -D-glucopyranosyluronate-(1 $\rightarrow$ 3)-4-*O*-acetyl-6-*O*-benzyl-2-deoxy-2-*N*-trichloroacetamido-1-thio- $\beta$ -D-galactopyranoside **26**:**

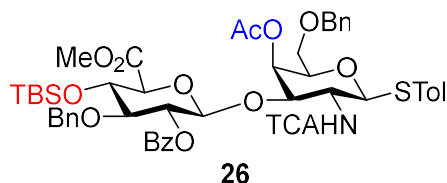

To a solution of **25** (1 g, 0.89 mmol) in THF/MeOH (10:1, 20 mL), hydrazine acetate (0.247 g, 2.7 mmol) was added at 0 °C. The reaction was stirred for 5 h at rt. Upon completion, the mixture was cooled down to 0 °C, and quenched with acetone, concentrated under vacuo, diluted with ethyl acetate (50 mL), washed with saturated NaHCO<sub>3</sub>, and brine. The organic layer was concentrated and the residue was dissolved in Py:Ac<sub>2</sub>O (2:1, 20 mL) and the mixture was stirred at rt till the reaction was completed. Then the mixture was diluted with EtOAc, washed with 1M HCl, NaHCO<sub>3</sub> and NaCl solutions, concentrated and purified with silica gel chromatography to afford **26** (0.88 g, 93% in 2 steps) as a white solid. <sup>1</sup>H NMR (500 MHz, Chloroform-*d*)  $\delta$  7.95 – 7.91 (m, 2H), 7.57 – 7.54 (m, 1H), 7.43 – 7.38 (m, 4H), 7.37 – 7.30 (m, 5H), 7.16 – 7.12 (m, 5H), 7.04 – 7.01 (m, 2H), 6.70 (d, *J* = 7.4 Hz, 1H), 5.52 (d, *J* = 3.2 Hz, 1H), 5.26 – 5.20 (m, 2H), 4.85 (d, *J* = 6.9 Hz, 1H), 4.68 – 4.63 (m, 2H), 4.58 (dd, *J* = 10.4, 3.3 Hz, 1H), 4.53 – 4.46 (m, 2H), 4.12 (dd, *J* = 8.8, 7.8 Hz, 1H), 3.97 (d, *J* = 8.7 Hz, 1H), 3.87 – 3.84 (m, 1H), 3.76 (s, 3H), 3.67 – 3.61 (m, 1H), 3.59 – 3.54 (m, 3H), 2.31 (s, 3H), 2.03 (s, 3H), 0.85 (s, 9H), -0.01 (d, *J* = 4.1 Hz, 6H). <sup>13</sup>C NMR (126 MHz, Chloroform-*d*)  $\delta$  169.90, 168.53, 164.87, 161.55, 138.31, 137.96, 137.63, 133.36, 132.95, 129.84, 129.80, 129.75, 129.42, 128.60, 128.46, 128.35, 128.06, 128.00, 127.83, 127.66, 127.45, 127.40, 99.75, 92.08, 84.85, 82.37, 77.27, 76.52, 74.14, 73.90, 73.53, 73.28, 71.61, 69.34, 69.17, 54.17, 52.36, 25.71, 21.17, 20.66, 17.87, -4.15, -5.22. ESI-MS: C<sub>51</sub>H<sub>60</sub>Cl<sub>3</sub>NO<sub>13</sub>SSi [M+H]<sup>+</sup> calcd: 1002.2090, obsd: 1002.2065, [M+NH<sub>4</sub>]<sup>+</sup> calcd: 1077.3, obsd: 1077.3.

**2-Naphthylmethyl (methyl 3-*O*-benzyl-2-*O*-benzoyl-4-*O*-*t*-butyldimethylsilyl- $\beta$ -D-glucopyranosyluronate-(1 $\rightarrow$ 3)-6-*O*-benzyl-4-*O*-levulinoyl-2-deoxy-2-*N*-trichloroacetamido- $\beta$ -D-galactopyranosyl-(1 $\rightarrow$ 4)-(methyl 3-*O*-benzyl-2-*O*-benzoyl-*O*- $\beta$ -D-glucopyranosyluronate)-(1 $\rightarrow$ 3)-6-*O*-benzyl-4-*O*-levulinoyl-2-deoxy-2-*N*-trichloroacetamido- $\beta$ -D-galactopyranoside **28**:**

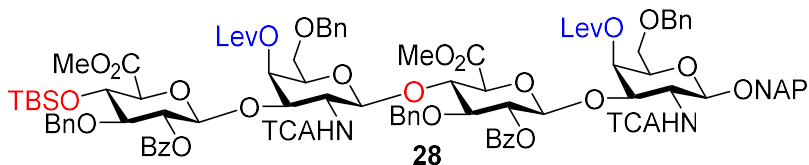

Following the general procedure for glycosylation catalyzed by NIS/TfOH, tetrasaccharide **28** was obtained (0.78 g, 80%) by coupling between donor **25** (0.7 g, 0.6 mmol) and acceptor **27** (0.5 g, 0.48 mmol).  $[\alpha_D^{20}] = +20$  (C = 0.01, DCM).  $^1\text{H NMR}$  (500 MHz, Chloroform-*d*)  $\delta$  7.98 – 7.94 (m, 2H), 7.92 – 7.89 (m, 2H), 7.81 – 7.70 (m, 4H), 7.56 – 7.51 (m, 2H), 7.48 – 7.44 (m, 2H), 7.42 – 7.33 (m, 9H), 7.32 – 7.23 (m, 7H), 7.16 (t,  $J = 2.4$  Hz, 5H), 7.12 – 7.07 (m, 5H), 6.97 (d,  $J = 8.5$  Hz, 1H), 6.83 (d,  $J = 7.0$  Hz, 1H), 5.55 – 5.51 (m, 2H), 5.24 (t,  $J = 6.9$  Hz, 1H), 5.11 (dd,  $J = 8.4$ , 7.1 Hz, 1H), 5.02 (d,  $J = 1.3$  Hz, 1H), 5.00 (d,  $J = 4.7$  Hz, 1H), 4.92 – 4.87 (m, 2H), 4.81 (d,  $J = 11.0$  Hz, 1H), 4.73 – 4.68 (m, 3H), 4.61 – 4.56 (m, 2H), 4.55 – 4.50 (m, 3H), 4.30 – 4.24 (m, 2H), 4.19 – 4.13 (m, 3H), 4.07 – 4.01 (m, 1H), 3.97 (d,  $J = 9.1$  Hz, 1H), 3.90 – 3.87 (m, 1H), 3.83 – 3.80 (m, 1H), 3.74 (s, 3H), 3.73 – 3.70 (m, 1H), 3.66 (s, 3H), 3.65 – 3.61 (m, 2H), 3.60 – 3.52 (m, 3H), 3.38 – 3.32 (m, 2H), 2.84 – 2.75 (m, 2H), 2.70 – 2.63 (m, 3H), 2.60 – 2.52 (m, 3H), 2.16 (s, 3H), 2.09 (s, 3H), 0.85 (s, 9H), 0.00 (d,  $J = 1.8$  Hz, 6H).  $^{13}\text{C NMR}$  (126 MHz, Chloroform-*d*)  $\delta$  206.91, 206.76, 177.57, 171.61, 171.46, 169.33, 168.71, 164.91, 164.90, 161.99, 161.63, 138.02, 137.99, 137.93, 137.57, 133.92, 133.31, 133.17, 133.12, 133.07, 133.01, 129.94, 129.82, 129.66, 129.53, 129.40, 128.46, 128.40, 128.34, 128.30, 128.28, 128.09, 128.05, 128.03, 127.99, 127.89, 127.78, 127.75, 127.66, 127.54, 127.45, 127.28, 126.17, 126.10, 125.99, 100.37, 99.86, 99.45, 97.38, 92.70, 92.05, 82.42, 79.75, 77.27, 76.50, 74.74, 74.10, 73.70, 73.65, 73.57, 73.15, 73.11, 72.98, 72.95, 72.70, 71.52, 71.27, 69.58, 69.18, 68.91, 68.69, 68.17, 64.02, 56.35, 54.97, 52.91, 52.39, 38.19, 37.93, 29.83, 29.78, 29.70, 29.69, 29.65, 29.55, 28.01, 27.75, 25.72, 17.88, -4.07, -5.24. ESI-MS:  $\text{C}_{99}\text{H}_{108}\text{Cl}_6\text{N}_2\text{O}_{29}\text{Si}$   $[\text{M}+2\text{NH}_4]^{2+}$  calcd: 1032.2778, obsd: 1032.2792,  $[\text{M}+\text{NH}_4]^+$  calcd: 2046.5, obsd: 2046.4.

**2-Naphthylmethyl (methyl 3-*O*-benzyl-2-*O*-benzoyl- $\beta$ -D-glucopyranosyluronate)-(1→3)-6-*O*-benzyl-4-*O*-levulinoyl-2-deoxy-2-*N*-trichloroacetamido- $\beta$ -D-galactopyranosyl-(1→4)-(methyl 3-*O*-benzyl-2-*O*-benzoyl- $\beta$ -D-glucopyranosyluronate)-(1→3)-6-*O*-benzyl-4-*O*-levulinoyl-2-deoxy-2-*N*-trichloroacetamido- $\beta$ -D-galactopyranoside **29**:**

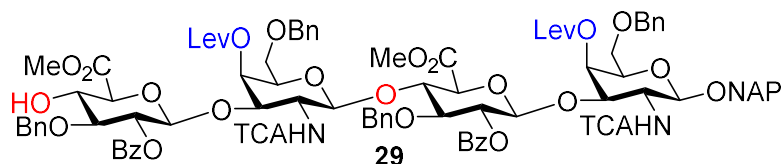



Following the general procedure for TBS removal, tetrasaccharide acceptor **29** (0.334 g, 90%) was obtained from **28** (0.39 g, 0.19 mmol).  $[\alpha_D^{20}] = +3.6$  (C = 0.11, DCM).  $^1\text{H}$  NMR (500 MHz, Chloroform-*d*)  $\delta$  8.01 – 7.97 (m, 2H), 7.93 – 7.90 (m, 2H), 7.82 – 7.71 (m, 4H), 7.59 – 7.53 (m, 2H), 7.48 – 7.45 (m, 2H), 7.44 – 7.40 (m, 3H), 7.40 – 7.35 (m, 5H), 7.34 – 7.29 (m, 3H), 7.28 – 7.23 (m, 4H), 7.18 – 7.13 (m, 5H), 7.11 – 7.07 (m, 5H), 6.87 (d,  $J = 8.3$  Hz, 1H), 6.80 (d,  $J = 7.0$  Hz, 1H), 5.58 – 5.53 (m, 2H), 5.17 – 5.10 (m, 2H), 5.04 – 4.99 (m, 2H), 4.97 (d,  $J = 8.4$  Hz, 1H), 4.82 – 4.77 (m, 2H), 4.75 – 4.69 (m, 4H), 4.61 (dd,  $J = 10.9, 3.4$  Hz, 1H), 4.56 – 4.49 (m, 3H), 4.32 – 4.24 (m, 3H), 4.19 (dd,  $J = 9.1, 8.1$  Hz, 1H), 4.09 (dd,  $J = 9.9, 8.8$  Hz, 1H), 3.93 – 3.86 (m, 3H), 3.84 – 3.80 (m, 1H), 3.76 (s, 3H), 3.67 (s, 3H), 3.66 – 3.53 (m, 6H), 3.37 – 3.33 (m, 2H), 2.92 – 2.86 (m, 1H), 2.85 – 2.79 (m, 1H), 2.73 – 2.65 (m, 3H), 2.63 – 2.53 (m, 3H), 2.17 (s, 3H), 2.15 (s, 3H).  $^{13}\text{C}$  NMR (126 MHz, Chloroform-*d*)  $\delta$  206.91, 206.86, 171.71, 171.58, 169.64, 169.12, 165.01, 164.89, 162.00, 161.58, 137.99, 137.88, 137.75, 133.91, 133.35, 133.19, 133.13, 133.09, 130.06, 129.81, 129.67, 129.59, 129.39, 128.49, 128.41, 128.32, 128.26, 128.07, 128.05, 128.00, 127.98, 127.90, 127.77, 127.70, 127.67, 127.60, 127.48, 127.28, 126.18, 126.12, 125.98, 100.45, 100.29, 99.34, 97.35, 92.61, 92.03, 80.51, 79.77, 77.07, 74.75, 74.33, 74.06, 73.74, 73.71, 73.60, 72.98, 72.95, 72.76, 72.70, 71.72, 71.34, 69.58, 69.17, 68.69, 68.05, 56.44, 55.29, 52.92, 52.85, 38.20, 38.07, 29.83, 28.03, 27.89. ESI-MS:  $\text{C}_{93}\text{H}_{94}\text{Cl}_6\text{N}_2\text{O}_{29}$   $[\text{M}+2\text{NH}_4]^{+2}$  calcd: 975.7377, obsd: 975.7313,  $[\text{M}+\text{NH}_4]^+$  calcd: 1933.4, obsd: 1933.4.

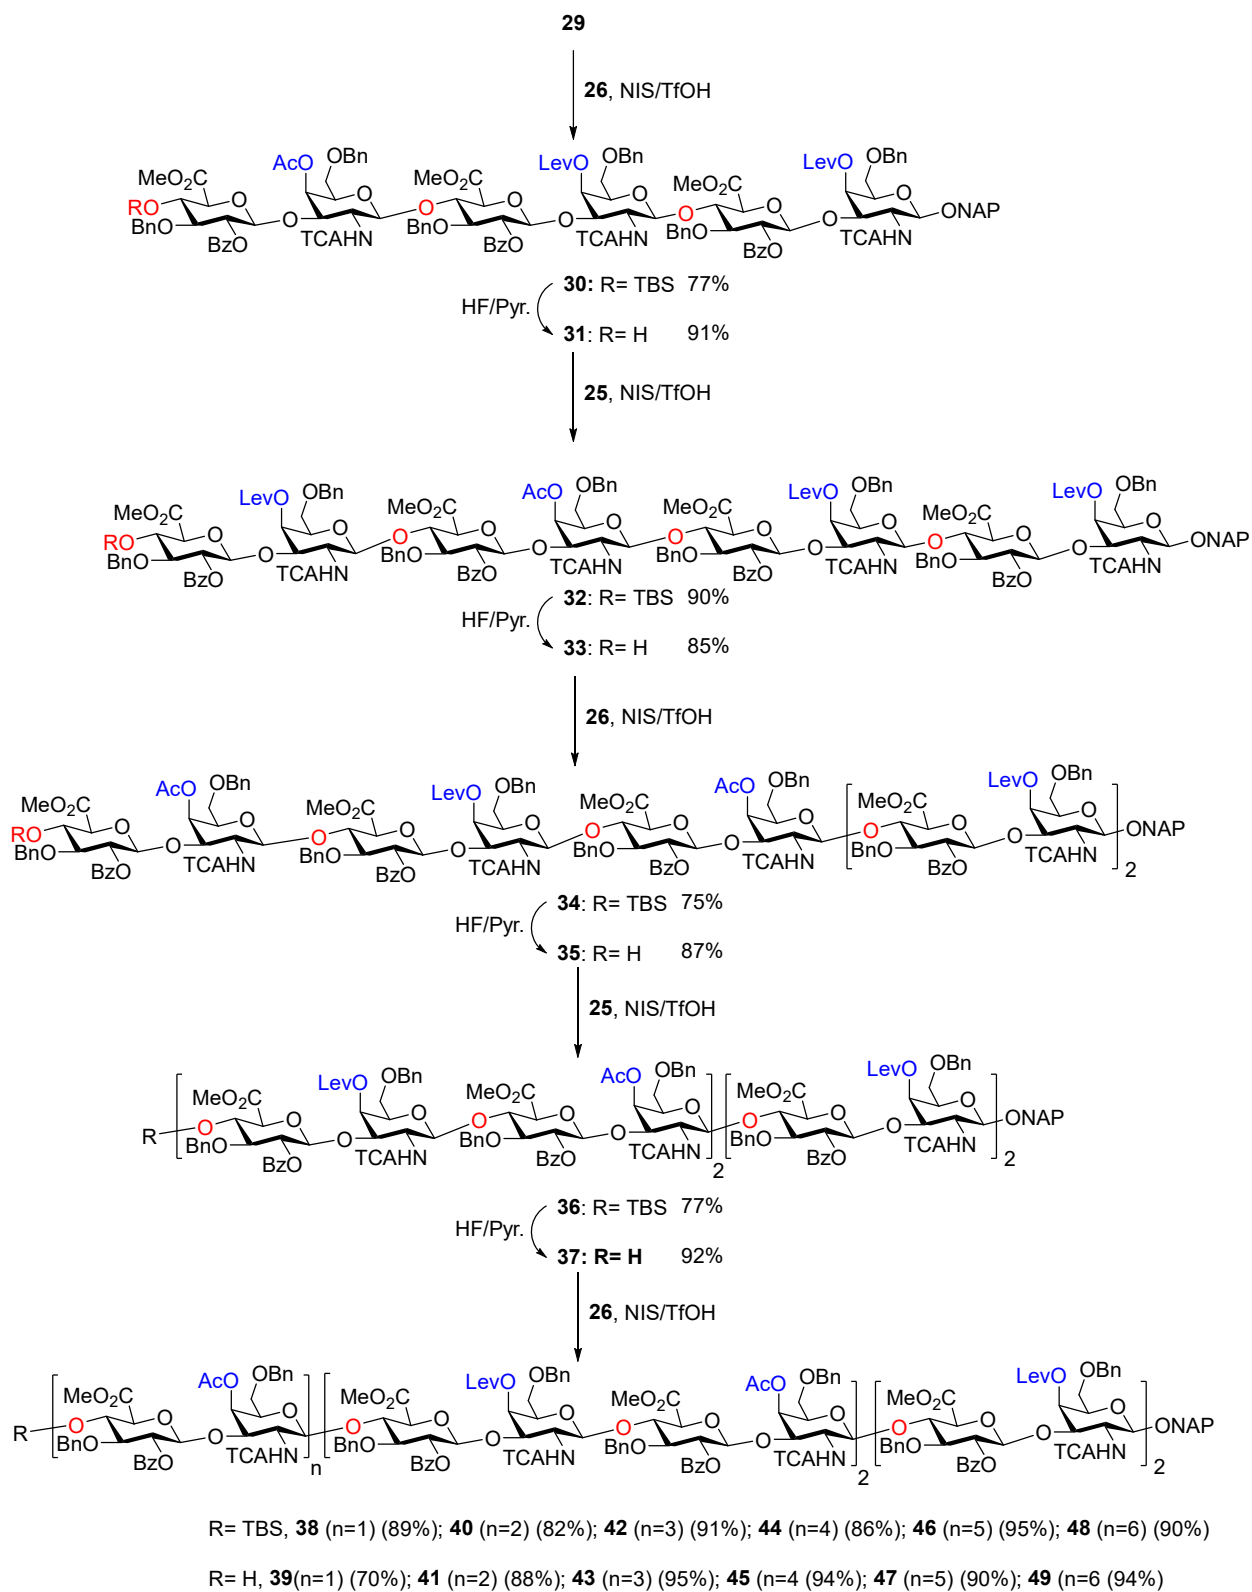

**6-mer 30:**

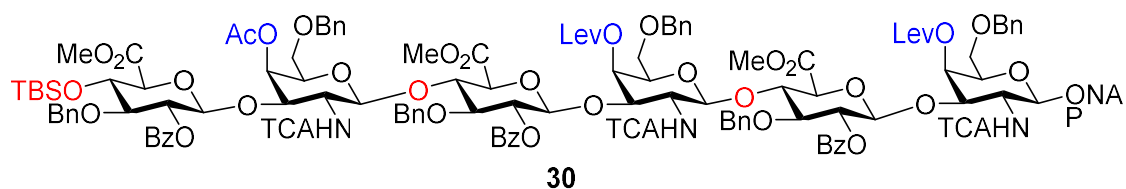

Following the general procedure for glycosylation catalyzed by NIS/TfOH, hexasaccharide **30** was obtained (0.383 g, 77%) through coupling between donor **29** (0.296 g, 0.28 mmol) and acceptor **26** (0.334 g, 0.17 mmol). <sup>1</sup>H NMR (500 MHz, Chloroform-*d*) δ 8.06 – 8.04 (m, 1H), 7.96 (m, 4H), 7.91 – 7.89 (m, 2H), 7.81 – 7.70 (m, 5H), 7.54 (m, 4H), 7.47 – 7.44 (m, 2H), 7.40 (m, 7H), 7.37 – 7.35 (m, 4H), 7.31 (m, 5H), 7.26 – 7.23 (m, 4H), 7.17 (d, *J* = 4.3 Hz, 5H), 7.13 – 7.11 (m, 2H), 7.10 – 7.06 (m, 8H), 6.92 – 6.87 (m, 2H), 6.76 (d, *J* = 6.9 Hz, 1H), 5.52 (t, *J* = 3.7 Hz, 2H), 5.50 (d, *J* = 3.1 Hz, 1H), 5.28 – 5.25 (m, 1H), 5.14 – 5.09 (m, 2H), 5.02 (s, 1H), 5.00 (d, *J* = 3.8 Hz, 1H), 4.96 – 4.93 (m, 2H), 4.91 (d, *J* = 8.4 Hz, 1H), 4.83 – 4.80 (m, 1H), 4.79 – 4.77 (m, 1H), 4.73 – 4.69 (m, 3H), 4.60 – 4.59 (m, 1H), 4.57 – 4.56 (m, 1H), 4.54 – 4.50 (m, 4H), 4.33 – 4.30 (m, 1H), 4.29 – 4.27 (m, 1H), 4.26 – 4.25 (m, 1H), 4.24 – 4.22 (m, 1H), 4.17 (m, 4H), 4.06 – 4.02 (m, 1H), 3.99 (d, *J* = 9.0 Hz, 1H), 3.96 – 3.93 (m, 1H), 3.91 – 3.85 (m, 3H), 3.81 (t, *J* = 6.1 Hz, 1H), 3.76 (s, 3H), 3.74 – 3.68 (m, 3H), 3.67 (s, 3H), 3.66 (s, 3H), 3.64 – 3.61 (m, 2H), 3.59 – 3.53 (m, 3H), 3.34 – 3.27 (m, 4H), 2.84 – 2.68 (m, 4H), 2.66 – 2.60 (m, 2H), 2.57 – 2.47 (m, 4H), 2.16 (s, 3H), 2.10 (s, 3H), 1.97 (s, 3H), 0.84 (s, 9H), -0.01 (s, 3H), -0.02 (s, 3H). <sup>13</sup>C NMR (126 MHz, Chloroform-*d*) δ 206.86, 171.61, 171.57, 169.82, 169.18, 169.09, 168.79, 164.89, 164.86, 161.97, 161.72, 161.66, 138.11, 137.98, 137.90, 137.87, 137.61, 133.89, 133.33, 133.16, 133.12, 133.07, 133.00, 129.94, 129.81, 129.66, 129.55, 129.39, 128.47, 128.40, 128.34, 128.30, 128.05, 128.03, 127.98, 127.95, 127.92, 127.89, 127.87, 127.75, 127.67, 127.66, 127.59, 127.45, 127.38, 127.36, 127.27, 126.16, 126.10, 125.97, 100.40, 100.00, 99.76, 99.41, 99.38, 97.36, 92.63, 92.51, 82.38, 79.95, 79.75, 76.47, 74.67, 74.35, 74.18, 73.91, 73.78, 73.70, 73.62, 73.59, 73.54, 73.18, 73.10, 73.03, 72.95, 72.67, 72.50, 71.49, 71.33, 69.57, 69.24, 69.20, 68.80, 68.69, 68.38, 68.15, 64.01, 56.42, 55.08, 54.99, 52.89, 52.36, 38.19, 38.12, 33.84, 31.63, 29.82, 29.71, 29.67, 29.37, 29.17, 28.01, 27.90, 25.70, 22.71, 20.56, 17.87, 14.15, -4.17, -5.28. ESI-MS: C<sub>137</sub>H<sub>146</sub>C<sub>19</sub>N<sub>3</sub>O<sub>42</sub>Si [M+2NH<sub>4</sub>]<sup>2+</sup> calcd: 1444.3499, obsd: 1444.3450, [M+NH<sub>4</sub>]<sup>+</sup> calcd: 2870.7, obsd: 2870.6.

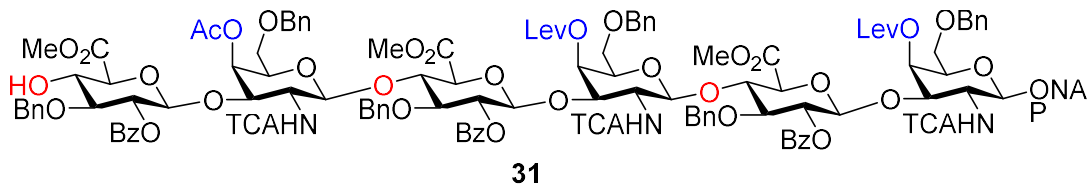

Following the general procedure for TBS removal, hexasaccharide acceptor **31** was obtained (0.454 g, 91%) from **30** (0.519 g, 0.18 mmol).  $[\alpha_D^{20}] = +12.5$  (C = 0.04, DCM).  $^1\text{H NMR}$  (500 MHz, Chloroform-*d*)  $\delta$  8.02 – 7.99 (m, 2H), 7.97 – 7.94 (m, 2H), 7.92 – 7.88 (m, 2H), 7.81 – 7.70 (m, 4H), 7.60 – 7.53 (m, 3H), 7.48 – 7.36 (m, 13H), 7.32 m, 5H), 7.28 – 7.25 (m, 6H), 7.18 – 7.14 (m, 5H), 7.12 – 7.04 (m, 10H), 6.88 – 6.83 (m, 2H), 6.78 (d,  $J = 7.0$  Hz, 1H), 5.55 – 5.51 (m, 3H), 5.17 (dd,  $J = 8.8, 7.1$  Hz, 1H), 5.14 – 5.09 (m, 2H), 5.02 (s, 1H), 5.00 (d,  $J = 4.6$  Hz, 1H), 4.98 – 4.94 (m, 2H), 4.82 – 4.79 (m, 3H), 4.76 (d,  $J = 3.9$  Hz, 1H), 4.74 – 4.68 (m, 4H), 4.61 – 4.58 (m, 1H), 4.57 – 4.51 (m, 4H), 4.36 – 4.30 (m, 2H), 4.29 – 4.26 (m, 2H), 4.25 – 4.22 (m, 2H), 4.21 – 4.17 (m, 2H), 4.09 (dd,  $J = 9.8, 8.7$  Hz, 1H), 3.90 (m, 5H), 3.81 (t,  $J = 6.2$  Hz, 1H), 3.78 (s, 3H), 3.74 (d,  $J = 6.3$  Hz, 1H), 3.71 (t,  $J = 6.3$  Hz, 1H), 3.67 (s, 3H), 3.66 (s, 3H), 3.65 (d,  $J = 3.1$  Hz, 1H), 3.63 (d,  $J = 3.9$  Hz, 1H), 3.62 – 3.61 (m, 1H), 3.60 – 3.52 (m, 3H), 3.33 (d,  $J = 6.3$  Hz, 2H), 3.30 (d,  $J = 6.2$  Hz, 2H), 2.85 – 2.73 (m, 3H), 2.72 – 2.61 (m, 3H), 2.59 – 2.48 (m, 4H), 2.17 (s, 3H), 2.10 (s, 3H), 2.05 (s, 3H).  $^{13}\text{C NMR}$  (126 MHz, Chloroform-*d*)  $\delta$  206.89, 206.87, 171.57, 169.91, 169.63, 169.10, 169.02, 164.94, 164.90, 164.87, 161.99, 161.69, 161.58, 138.06, 137.98, 137.90, 137.82, 137.75, 133.89, 133.34, 133.17, 133.13, 133.08, 130.07, 129.95, 129.81, 129.63, 129.56, 129.39, 128.48, 128.41, 128.37, 128.34, 128.32, 128.26, 128.04, 128.02, 127.99, 127.92, 127.90, 127.76, 127.67, 127.60, 127.46, 127.38, 127.28, 126.18, 126.11, 125.98, 100.42, 100.24, 100.13, 99.37, 99.25, 97.36, 92.57, 92.51, 92.02, 80.53, 79.92, 79.75, 74.69, 74.36, 74.31, 74.22, 74.09, 73.80, 73.73, 73.71, 73.69, 73.59, 73.57, 72.99, 72.96, 72.94, 72.91, 72.68, 72.53, 71.59, 71.34, 69.58, 69.19, 68.90, 68.69, 68.12, 56.43, 55.33, 55.10, 52.93, 52.90, 52.82, 38.20, 38.13, 29.82, 29.71, 28.02, 27.92, 20.66. ESI-MS:  $\text{C}_{131}\text{H}_{132}\text{Cl}_9\text{N}_3\text{O}_{42}$   $[\text{M}+2\text{NH}_4]^{+2}$  calcd: 1387.3067, obsd: 1387.3064,  $[\text{M}+\text{NH}_4]^+$  calcd: 2756.6, obsd: 2756.6.

**8-mer 32:**

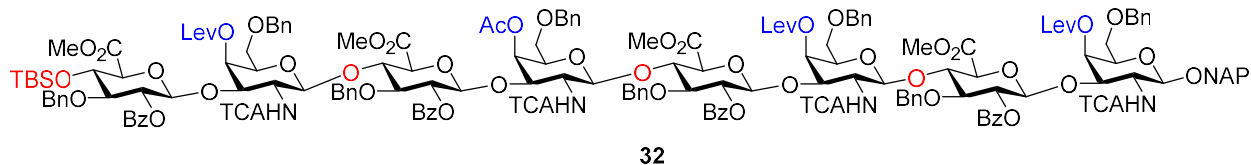

Following the general procedure for glycosylation catalyzed by NIS/TfOH, octasaccharide **32** was obtained (0.557 g, 90%) through coupling between donor **25** (0.333 g, 0.29 mmol) and acceptor **31** (0.454 g, 0.166 mmol).  $[\alpha_D^{20}] = +22$  (C = 0.05, DCM).  $^1\text{H}$  NMR (500 MHz, Chloroform-*d*)  $\delta$  7.98 – 7.93 (m, 6H), 7.92 – 7.89 (m, 2H), 7.82 – 7.69 (m, 5H), 7.55 (m, 4H), 7.47 – 7.45 (m, 2H), 7.44 – 7.38 (m, 8H), 7.38 – 7.35 (m, 4H), 7.33 – 7.29 (m, 7H), 7.28 – 7.23 (m, 10H), 7.17 (m, 4H), 7.15 – 7.11 (m, 6H), 7.09 (m, 6H), 7.07 – 7.03 (m, 3H), 6.96 (d,  $J = 8.4$  Hz, 1H), 6.88 – 6.85 (m, 2H), 6.76 (d,  $J = 7.0$  Hz, 1H), 5.54 – 5.50 (m, 4H), 5.24 (t,  $J = 6.7$  Hz, 1H), 5.15 – 5.13 (m, 1H), 5.13 – 5.09 (m, 2H), 5.02 (s, 1H), 5.00 (d,  $J = 3.9$  Hz, 1H), 4.97 – 4.92 (m, 3H), 4.87 – 4.84 (m, 2H), 4.81 – 4.76 (m, 4H), 4.73 – 4.68 (m, 3H), 4.61 – 4.50 (m, 8H), 4.36 – 4.30 (m, 2H), 4.28 – 4.22 (m, 7H), 4.20 – 4.16 (m, 2H), 4.16 – 4.11 (m, 2H), 4.08 – 4.01 (m, 2H), 4.00 – 3.97 (m, 2H), 3.93 – 3.90 (m, 2H), 3.89 – 3.85 (m, 2H), 3.81 (t,  $J = 6.1$  Hz, 1H), 3.74 (s, 3H), 3.73 – 3.70 (m, 3H), 3.69 (s, 3H), 3.67 (s, 3H), 3.66 (s, 3H), 3.64 – 3.61 (m, 2H), 3.59 – 3.57 (m, 1H), 3.56 – 3.52 (m, 2H), 3.35 – 3.32 (m, 3H), 3.28 (d,  $J = 6.1$  Hz, 1H), 2.85 – 2.73 (m, 4H), 2.70 (t,  $J = 6.1$  Hz, 1H), 2.67 – 2.60 (m, 3H), 2.58 – 2.50 (m, 5H), 2.47 – 2.40 (m, 2H), 2.17 (s, 3H), 2.09 (s, 3H), 2.09 (s, 3H), 1.96 (s, 3H), 0.85 (s, 9H), 0.02 – -0.02 (m, 6H).  $^{13}\text{C}$  NMR (126 MHz, Chloroform-*d*)  $\delta$  206.85, 206.73, 171.57, 171.42, 169.93, 169.49, 169.10, 168.96, 168.74, 164.91, 164.90, 164.86, 161.98, 161.73, 161.69, 138.07, 137.99, 137.98, 137.90, 137.81, 137.58, 133.89, 133.33, 133.17, 133.13, 133.08, 129.96, 129.95, 129.81, 129.67, 129.55, 129.39, 128.47, 128.40, 128.37, 128.34, 128.31, 128.29, 128.10, 128.04, 128.01, 127.98, 127.92, 127.90, 127.82, 127.76, 127.66, 127.59, 127.56, 127.47, 127.40, 127.37, 127.28, 126.17, 126.11, 125.97, 100.40, 100.11, 99.98, 99.92, 99.41, 99.33, 99.25, 97.35, 92.51, 92.47, 82.41, 79.92, 79.82, 79.76, 76.48, 74.68, 74.39, 74.31, 74.25, 74.03, 73.74, 73.71, 73.68, 73.58, 73.56, 73.10, 73.05, 73.01, 72.96, 72.85, 72.67, 72.53, 71.46, 71.33, 69.58, 69.20, 68.89, 68.85, 68.68, 68.16, 68.13, 68.09, 56.43, 55.21, 55.07, 54.93, 52.92, 52.89, 52.39, 38.19, 38.12, 37.92, 29.82, 29.78, 29.71, 29.66, 28.01, 27.91, 27.74, 25.71, 20.66, 17.87, -4.09, -5.25. ESI-MS:  $\text{C}_{178}\text{H}_{188}\text{Cl}_{12}\text{N}_4\text{O}_{56}\text{Si}$   $[\text{M}+3\text{NH}_4]^{+3}$  calcd: 1261.9659, obsd: 1261.9602,  $[\text{M}+2\text{NH}_4]^{+2}$  calcd: 1884.4, obsd: 1884.4.

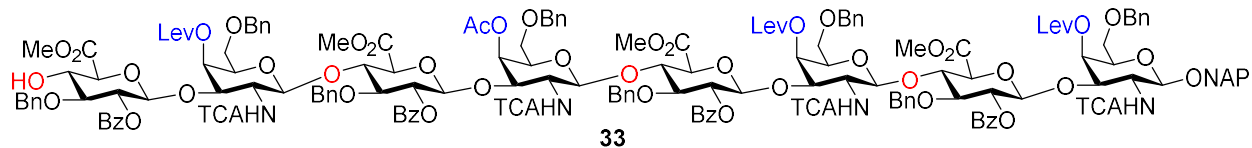

Following the general procedure for TBS removal, octasaccharide acceptor **33** was obtained (0.46 g, 85%) from **32** (0.56 g, 0.15 mmol).  $[\alpha_D^{20}] = +2$  (C = 0.05, DCM).  $^1\text{H}$  NMR (500 MHz, Chloroform-*d*)  $\delta$  8.01 – 7.93 (m, 6H), 7.91 – 7.88 (m, 2H), 7.81 – 7.73 (m, 3H), 7.70 (s, 1H), 7.61 – 7.52 (m, 5H), 7.47 – 7.44 (m, 3H), 7.41 (m, 6H), 7.38 – 7.35 (m, 4H), 7.33 – 7.28 (m, 7H), 7.26 (m, 10H), 7.16 (m, 5H), 7.14 – 7.02 (m, 15H), 6.87 – 6.82 (m, 3H), 6.76 (d,  $J = 7.1$  Hz, 1H), 5.56 – 5.49 (m, 4H), 5.16 – 5.09 (m, 4H), 5.02 (s, 1H), 5.00 (d,  $J = 4.7$  Hz, 1H), 4.98 – 4.91 (m, 3H), 4.84 – 4.76 (m, 6H), 4.74 – 4.68 (m, 4H), 4.62 – 4.49 (m, 7H), 4.36 – 4.30 (m, 2H), 4.29 – 4.15 (m, 11H), 4.11 – 4.06 (m, 1H), 3.96 – 3.84 (m, 8H), 3.81 (t,  $J = 6.2$  Hz, 1H), 3.76 (s, 3H), 3.74 – 3.71 (m, 2H), 3.69 (s, 3H), 3.67 (s, 3H), 3.66 (s, 3H), 3.63 (d,  $J = 3.0$  Hz, 1H), 3.62 – 3.57 (m, 3H), 3.56 – 3.53 (m, 1H), 3.34 – 3.31 (m, 3H), 3.29 – 3.26 (m, 2H), 3.21 (d,  $J = 2.7$  Hz, 1H), 2.91 – 2.76 (m, 4H), 2.75 – 2.66 (m, 3H), 2.57 (m, 7H), 2.17 (s, 3H), 2.15 (s, 3H), 2.10 (s, 3H), 1.97 (s, 3H).  $^{13}\text{C}$  NMR (126 MHz, Chloroform-*d*)  $\delta$  206.86, 206.84, 171.67, 171.56, 169.87, 169.69, 169.29, 169.10, 168.95, 164.99, 164.92, 164.89, 164.86, 161.98, 161.70, 161.68, 161.58, 138.06, 137.97, 137.94, 137.90, 137.81, 137.75, 133.89, 133.34, 133.18, 133.12, 133.08, 130.06, 129.96, 129.81, 129.59, 129.56, 129.54, 129.39, 128.47, 128.40, 128.37, 128.35, 128.32, 128.26, 128.07, 128.03, 127.99, 127.92, 127.90, 127.89, 127.76, 127.69, 127.66, 127.61, 127.59, 127.46, 127.41, 127.37, 127.28, 126.17, 126.11, 125.97, 100.42, 100.24, 100.13, 100.05, 99.41, 99.38, 99.18, 97.34, 92.62, 92.45, 80.49, 79.93, 79.78, 79.76, 76.94, 74.69, 74.38, 74.36, 74.30, 73.97, 73.83, 73.78, 73.71, 73.67, 73.59, 73.56, 73.00, 72.94, 72.85, 72.76, 72.66, 72.53, 71.70, 71.34, 69.58, 69.19, 69.08, 68.85, 68.68, 68.12, 67.93, 56.44, 55.28, 55.24, 55.09, 52.92, 52.90, 52.85, 38.19, 38.12, 38.07, 29.82, 29.71, 29.66, 28.01, 27.91, 27.88, 20.65. ESI-MS:  $\text{C}_{172}\text{H}_{174}\text{Cl}_{12}\text{N}_4\text{O}_{56}$   $[\text{M}+3\text{NH}_4]^{+3}$  calcd: 1223.93, obsd: 1223.93,  $[\text{M}+2\text{NH}_4]^{+2}$  calcd: 1826.9, obsd: 1826.9.

#### 10-mer **34**:

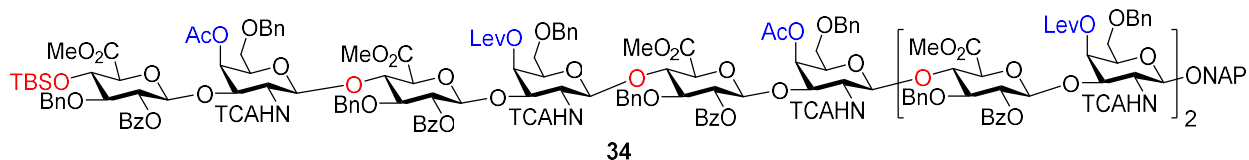

Following the general procedure for glycosylation catalyzed by NIS/TfOH, deca-saccharide **34** was obtained (0.5 g, 75%) through coupling between donor **26** (0.28 g, 0.26 mmol) and acceptor **33** (0.53 g, 0.15 mmol).  $[\alpha_D^{20}] = -20$  (C = 0.01, DCM).  $^1\text{H NMR}$  (500 MHz, Chloroform-*d*)  $\delta$  8.00 – 7.95 (m, 8H), 7.93 – 7.90 (m, 2H), 7.81 – 7.79 (m, 1H), 7.77 (m, 1H), 7.76 – 7.73 (m, 1H), 7.71 (m, 1H), 7.58 – 7.53 (m, 5H), 7.46 (m, 2H), 7.42 (m, 9H), 7.37 (m, 5H), 7.34 – 7.30 (m, 9H), 7.29 (d,  $J = 1.6$  Hz, 1H), 7.28 – 7.24 (m, 11H), 7.19 (m, 5H), 7.17 – 7.09 (m, 18H), 7.07 (m, 3H), 6.99 – 6.94 (m, 2H), 6.92 – 6.88 (m, 2H), 6.80 (d,  $J = 7.0$  Hz, 1H), 5.53 (m, 5H), 5.30 – 5.27 (m, 2H), 5.18 – 5.11 (m, 5H), 5.02 (d,  $J = 2.2$  Hz, 1H), 5.00 (s, 1H), 4.98 – 4.96 (m, 2H), 4.95 – 4.90 (m, 3H), 4.89 – 4.87 (m, 2H), 4.85 – 4.82 (m, 2H), 4.81 – 3.97 (m, 2H), 4.78 (d,  $J = 2.7$  Hz, 1H), 4.75 – 4.71 (m, 3H), 4.63 – 4.58 (m, 5H), 4.55 – 4.51 (m, 3H), 4.36 – 4.32 (m, 3H), 4.30 – 4.25 (m, 8H), 4.24 – 4.15 (m, 7H), 4.09 – 4.05 (m, 1H), 4.03 – 3.97 (m, 4H), 3.97 – 3.88 (m, 5H), 3.81 (d,  $J = 6.2$  Hz, 1H), 3.77 (s, 3H), 3.74 – 3.71 (m, 4H), 3.70 (s, 3H), 3.68 (s, 6H), 3.67 (s, 3H), 3.58 (m, 4H), 3.32 (m, 9H), 2.85 – 2.68 (m, 6H), 2.67 – 2.60 (m, 3H), 2.58 – 2.46 (m, 7H), 2.16 (s, 3H), 2.09 (s, 6H), 1.98 (s, 3H), 1.97 (s, 3H), 0.86 (s, 9H), -0.01 (s, 3H), -0.00 (s, 3H).  $^{13}\text{C NMR}$  (126 MHz, Chloroform-*d*)  $\delta$  206.91, 206.89, 206.87, 171.63, 171.61, 171.59, 169.95, 169.85, 169.36, 169.24, 169.14, 169.02, 168.83, 164.93, 164.91, 164.89, 161.99, 161.79, 161.75, 161.73, 161.71, 138.12, 138.08, 137.98, 137.94, 137.92, 137.87, 137.81, 137.62, 133.91, 133.36, 133.20, 133.14, 133.09, 129.96, 129.82, 129.56, 129.40, 128.49, 128.42, 128.39, 128.36, 128.33, 128.08, 128.05, 128.01, 127.99, 127.96, 127.94, 127.92, 127.90, 127.77, 127.70, 127.68, 127.63, 127.62, 127.48, 127.41, 127.28, 126.20, 126.13, 125.98, 100.37, 100.06, 99.87, 99.62, 99.46, 99.36, 97.40, 92.58, 92.54, 92.49, 82.39, 79.95, 79.79, 77.04, 76.79, 76.47, 74.64, 74.46, 74.14, 74.01, 73.91, 73.79, 73.71, 73.69, 73.60, 73.57, 73.20, 72.99, 72.84, 72.69, 72.53, 71.51, 71.31, 69.59, 69.22, 68.86, 68.68, 68.44, 68.17, 56.39, 55.17, 55.07, 54.97, 52.91, 52.38, 38.20, 38.14, 29.82, 29.71, 29.69, 28.04, 27.93, 25.73, 20.67, 20.58, 17.89, -4.14, -5.25. ESI-MS:  $\text{C}_{216}\text{H}_{226}\text{Cl}_{15}\text{N}_5\text{O}_{69}\text{Si}$   $[\text{M}+3\text{NH}_4]^{+3}$  calcd: 1536.0140, obsd: 1536.010.

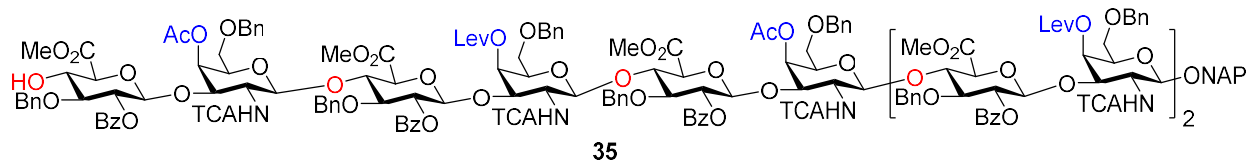

Following the general procedure for TBS removal, decasaccharide acceptor **35** was obtained (0.56 g, 87%) from **34** (0.66 g, 0.145 mmol).  $[\alpha_D^{20}] = -2.5$  (C = 0.12, DCM).  $^1\text{H NMR}$  (500 MHz, Chloroform-*d*)  $\delta$  8.03 – 7.97 (m, 8H), 7.94 – 7.91 (m, 2H), 7.82 – 7.72 (m, 5H), 7.60 – 7.54 (m, 5H), 7.48 – 7.41 (m, 11H), 7.41 – 7.39 (m, 1H), 7.39 – 7.37 (m, 3H), 7.35 – 7.31 (m, 9H), 7.29 – 7.25 (m, 12H), 7.12 (m, 26H), 6.98 – 6.94 (m, 2H), 6.93 – 6.90 (m, 2H), 6.84 (d,  $J = 7.1$  Hz, 1H), 5.56 – 5.52 (m, 5H), 5.21 – 5.12 (m, 6H), 5.03 (d,  $J = 4.2$  Hz, 1H), 5.01 (s, 1H), 4.99 – 4.97 (m, 3H), 4.93 (d,  $J = 8.4$  Hz, 1H), 4.89 (d,  $J = 6.3$  Hz, 1H), 4.87 – 4.82 (m, 4H), 4.81 – 4.76 (m, 4H), 4.75 (s, 1H), 4.74 – 4.70 (m, 2H), 4.63 – 4.58 (m, 4H), 4.57 – 4.53 (m, 3H), 4.38 – 3.33 (m, 3H), 4.31 – 4.24 (m, 10H), 4.22 – 4.16 (m, 3H), 4.12 – 4.08 (m, 1H), 4.01 – 3.90 (m, 10H), 3.83 (t,  $J = 6.2$  Hz, 1H), 3.78 (s, 3H), 3.74 – 3.72 (m, 3H), 3.71 (s, 3H), 3.70 – 3.68 (m, 6H), 3.68 (s, 3H), 3.66 – 3.63 (m, 2H), 3.62 – 3.59 (m, 2H), 3.33 (m, 9H), 2.84 – 2.67 (m, 6H), 2.64 – 2.48 (m, 9H), 2.17 (s, 3H), 2.10 (d,  $J = 1.6$  Hz, 6H), 2.05 (s, 3H), 1.98 (s, 3H).  $^{13}\text{C NMR}$  (126 MHz, Chloroform-*d*)  $\delta$  206.97, 206.94, 206.91, 171.60, 169.97, 169.57, 169.36, 169.16, 169.10, 169.04, 165.00, 164.93, 164.91, 162.01, 161.77, 161.75, 161.62, 138.08, 138.00, 137.99, 137.95, 137.93, 137.82, 137.76, 133.94, 133.38, 133.22, 133.15, 133.10, 130.10, 129.98, 129.84, 129.64, 129.57, 129.40, 128.51, 128.43, 128.40, 128.35, 128.34, 128.27, 128.06, 128.02, 128.00, 127.96, 127.93, 127.92, 127.79, 127.70, 127.68, 127.66, 127.63, 127.50, 127.43, 127.28, 126.21, 126.14, 125.99, 100.37, 100.23, 100.06, 99.99, 99.59, 99.48, 97.44, 92.61, 80.55, 79.92, 79.79, 77.10, 76.80, 74.63, 74.30, 74.21, 73.82, 73.72, 73.61, 73.58, 73.04, 72.96, 72.87, 72.70, 72.55, 71.63, 71.30, 69.61, 69.24, 68.92, 68.71, 68.19, 68.09, 56.36, 55.27, 55.18, 55.07, 52.94, 52.92, 52.83, 38.22, 38.16, 38.15, 29.83, 29.72, 29.70, 28.06, 27.96, 20.68. ESI-MS:  $\text{C}_{210}\text{H}_{212}\text{Cl}_{15}\text{N}_5\text{O}_{69}$   $[\text{M}+2\text{NH}_4]^{+2}$  calcd: 2238.4, obsd: 2238.4.

### 12-mer 36:



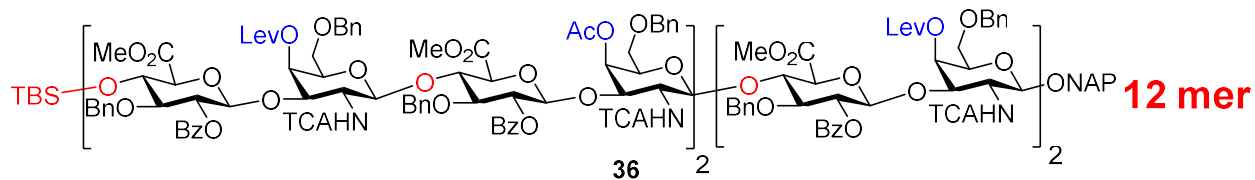

Following the general procedure for glycosylation catalyzed by NIS/TfOH, dodecasaccharide **36** was obtained (0.53 g, 77%) through coupling between donor **25** (0.255 g, 0.23 mmol) and acceptor **35** (0.562 g, 0.13 mmol).  $[\alpha_D^{20}] = +0.2$  ( $C = 1.03$ , DCM).  $^1\text{H NMR}$  (500 MHz, Chloroform- $d$ )  $\delta$  8.00 – 7.95 (m, 10H), 7.93 – 7.90 (m, 2H), 7.82 – 7.71 (m, 5H), 7.59 – 7.54 (m, 6H), 7.48 – 7.45 (m, 2H), 7.45 – 7.39 (m, 12H), 7.38 (m, 4H), 7.35 – 7.30 (m, 11H), 7.29 – 7.25 (m, 15H), 7.20 – 7.18 (m, 5H), 7.11 (m, 25H), 7.00 (d,  $J = 8.5$  Hz, 1H), 6.95 – 6.88 (m, 4H), 6.80 (d,  $J = 7.0$  Hz, 1H), 5.56 – 5.50 (m, 6H), 5.29 – 5.24 (m, 2H), 5.17 – 5.12 (m, 5H), 5.03 (s, 1H), 5.01 (d,  $J = 2.7$  Hz, 1H), 4.99 – 4.94 (m, 4H), 4.92 – 4.89 (mz, 2H), 4.88 – 4.82 (m, 5H), 4.80 – 4.71 (m, 8H), 4.61 – 4.57 (m, 5H), 4.56 – 4.54 (m, 2H), 4.53 – 4.51 (m, 1H), 4.37 (d,  $J = 5.6$  Hz, 1H), 4.34 (d,  $J = 5.6$  Hz, 1H), 4.32 (d,  $J = 3.1$  Hz, 1H), 4.30 – 4.27 (m, 6H), 4.27 – 4.23 (m, 6H), 4.21 – 4.14 (m, 5H), 4.08 (t,  $J = 8.4$  Hz, 1H), 4.02 – 3.99 (m, 2H), 3.97 (d,  $J = 2.6$  Hz, 1H), 3.96 – 3.93 (m, 3H), 3.92 (d,  $J = 2.4$  Hz, 1H), 3.91 – 3.88 (m, 2H), 3.82 (t,  $J = 6.2$  Hz, 1H), 3.75 (s, 3H), 3.74 – 3.72 (m, 4H), 3.71 – 3.69 (m, 6H), 3.69 – 3.67 (m, 6H), 3.67 (s, 3H), 3.66 – 3.63 (m, 2H), 3.61 – 3.54 (m, 4H), 3.37 – 3.28 (m, 10H), 2.85 – 2.69 (m, 7H), 2.64 – 2.44 (m, 13H), 2.17 (s, 3H), 2.11 – 2.07 (m, 9H), 1.97 (s, 6H), 0.87 (s, 9H), 0.04 – 0.01 (m, 6H).  $^{13}\text{C NMR}$  (126 MHz, Chloroform- $d$ )  $\delta$  206.87, 206.72, 171.58, 171.42, 169.96, 169.92, 169.51, 169.34, 169.12, 169.01, 168.77, 164.92, 164.90, 164.88, 161.98, 161.71, 138.07, 137.98, 137.92, 137.91, 137.80, 137.58, 133.90, 133.19, 133.13, 133.08, 129.96, 129.81, 129.67, 129.56, 129.39, 128.48, 128.41, 128.38, 128.36, 128.32, 128.29, 128.24, 128.11, 128.05, 128.01, 127.99, 127.94, 127.91, 127.82, 127.76, 127.68, 127.63, 127.60, 127.57, 127.48, 127.41, 127.28, 126.18, 126.12, 125.98, 100.38, 99.99, 99.32, 97.37, 92.72, 92.48, 82.41, 79.92, 79.80, 76.49, 74.66, 74.48, 74.32, 74.19, 74.03, 73.71, 73.59, 73.57, 72.96, 72.85, 72.53, 71.46, 71.32, 69.58, 69.19, 68.86, 68.68, 64.02, 56.41, 55.18, 55.08, 54.93, 52.90, 52.40, 38.20, 38.13, 37.92, 29.82, 29.78, 29.70, 29.67, 28.03, 27.93, 27.75, 25.73, 20.66, 17.88, -4.08, -5.23. ESI-MS:  $\text{C}_{257}\text{H}_{268}\text{Cl}_{18}\text{N}_6\text{O}_{83}\text{Si}$   $[\text{M}+2\text{NH}_4]^{+2}$  calcd: 2734.59, obsd: 2734.59.  $[\text{M}+3\text{NH}_4]^{+3}$  calcd: 1829.1, obsd: 1829.0.

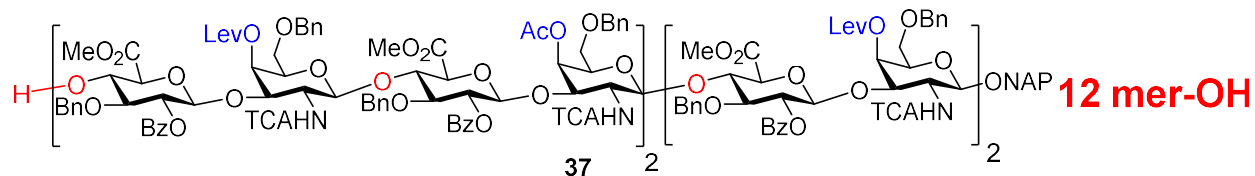

Following the general procedure for TBS removal, dodecasaccharide acceptor **37** was obtained (0.568 g, 92%) from **36** (0.63 g, 0.12 mmol).  $[\alpha_D^{20}] = +20$  (C = 0.01, DCM).  $^1\text{H NMR}$  (500 MHz, Chloroform-*d*)  $\delta$  8.03 – 7.95 (m, 10H), 7.94 – 7.91 (m, 2H), 7.82 – 7.71 (m, 5H), 7.62 – 7.52 (m, 7H), 7.49 – 7.37 (m, 18H), 7.33 (m, 11H), 7.29 – 7.25 (m, 14H), 7.12 (m, 30H), 6.93 (m, 5H), 6.82 (d,  $J = 7.0$  Hz, 1H), 5.58 – 5.51 (m, 6H), 5.19 – 5.12 (m, 6H), 5.03 (d,  $J = 3.4$  Hz, 1H), 5.01 (s, 1H), 4.99 – 4.95 (m, 3H), 4.94 – 4.91 (m, 2H), 4.89 – 4.87 (m, 2H), 4.86 – 4.83 (m, 2H), 4.82 – 4.77 (m, 5H), 4.76 – 4.71 (m, 4H), 4.63 – 4.57 (m, 5H), 4.57 – 4.50 (m, 4H), 4.39 – 4.32 (m, 4H), 4.31 – 4.24 (m, 13H), 4.23 – 4.14 (m, 4H), 4.13 – 4.10 (m, 2H), 4.00 – 3.89 (m, 11H), 3.84 – 3.82 (m, 1H), 3.76 (s, 3H), 3.75 – 3.72 (m, 4H), 3.72 – 3.70 (m, 6H), 3.69 (s, 6H), 3.67 (s, 3H), 3.66 – 3.63 (m, 2H), 3.62 – 3.59 (m, 2H), 3.39 – 3.29 (m, 10H), 2.92 – 2.70 (m, 8H), 2.67 – 2.45 (m, 13H), 2.17 (s, 3H), 2.15 (s, 3H), 2.10 (d,  $J = 2.0$  Hz, 6H), 1.98 (s, 3H).  $^{13}\text{C NMR}$  (126 MHz, Chloroform-*d*)  $\delta$  206.92, 206.90, 206.87, 171.69, 171.60, 169.95, 169.93, 169.63, 169.37, 169.34, 169.15, 169.03, 165.04, 164.96, 164.92, 164.90, 162.00, 161.76, 161.62, 138.09, 137.99, 137.96, 137.94, 137.81, 137.77, 133.93, 133.38, 133.22, 133.15, 133.10, 130.08, 129.98, 129.83, 129.62, 129.56, 129.40, 128.50, 128.43, 128.40, 128.38, 128.35, 128.27, 128.10, 128.06, 128.02, 128.01, 127.96, 127.93, 127.78, 127.70, 127.65, 127.62, 127.49, 127.43, 127.29, 126.21, 126.14, 125.99, 100.38, 100.24, 99.33, 97.42, 92.58, 92.50, 80.53, 79.95, 79.79, 76.79, 74.64, 74.31, 74.17, 73.85, 73.72, 73.71, 73.61, 73.58, 73.03, 72.96, 72.87, 72.76, 72.54, 71.72, 71.31, 69.61, 68.88, 68.70, 68.19, 67.99, 56.38, 55.20, 55.08, 52.94, 52.91, 52.86, 38.22, 38.15, 38.08, 29.83, 29.72, 29.70, 28.05, 27.95, 27.92, 20.68. ESI-MS:  $\text{C}_{251}\text{H}_{254}\text{C}_{118}\text{N}_6\text{O}_{83}$   $[\text{M}+3\text{NH}_4]^{+3}$  calcd: 1791.4, obsd: 1791.4,  $[\text{M}+2\text{NH}_4]^{+2}$  calcd: 2677.5, obsd: 2677.6.

#### 14-mer **38**:

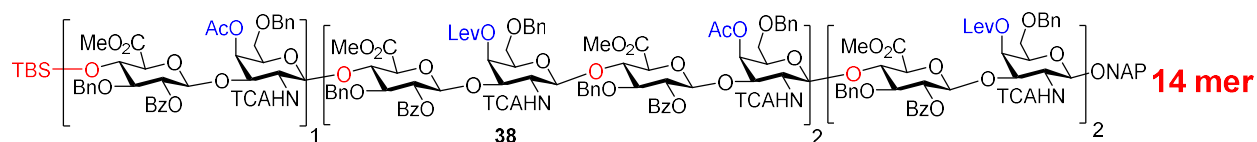

Following the general procedure for glycosylation catalyzed by NIS/TfOH, tetradecasaccharide **38** was obtained (0.59 g, 89%) through coupling between donor **26** (0.204 g, 0.19 mmol) and

acceptor **37** (0.568 g, 0.045 mmol).  $[\alpha_D^{20}] = +10$  (C = 0.01, DCM).  $^1\text{H}$  NMR (500 MHz, Chloroform-*d*)  $\delta$  8.08 – 8.04 (m, 1H), 8.01 – 7.95 (m, 11H), 7.93 – 7.90 (m, 2H), 7.82 – 7.71 (m, 5H), 7.59 – 7.53 (m, 7H), 7.49 – 7.35 (m, 21H), 7.35 – 7.22 (m, 31H), 7.20 – 7.17 (m, 5H), 7.11 (m, 29H), 6.98 – 6.93 (m, 3H), 6.92 – 6.88 (m, 3H), 6.80 (d,  $J = 7.0$  Hz, 1H), 5.56 – 5.46 (m, 7H), 5.30 – 5.27 (m, 1H), 5.18 – 5.10 (m, 6H), 5.03 (s, 1H), 5.01 (d,  $J = 2.5$  Hz, 1H), 4.99 – 4.82 (m, 14H), 4.81 – 4.76 (m, 5H), 4.75 – 4.71 (m, 3H), 4.64 – 4.50 (m, 12H), 4.37 – 4.32 (m, 4H), 4.30 – 4.23 (m, 14H), 4.21 – 4.13 (m, 6H), 4.09 – 4.05 (m, 1H), 4.03 – 3.88 (m, 14H), 3.82 (d,  $J = 6.3$  Hz, 1H), 3.77 (s, 3H), 3.72 (s, 5H), 3.71 – 3.68 (m, 15H), 3.67 (s, 3H), 3.61 – 3.55 (m, 4H), 3.38 – 3.27 (m, 12H), 2.83 – 2.67 (m, 7H), 2.64 – 2.46 (m, 12H), 2.17 (s, 3H), 2.12 – 2.07 (m, 9H), 2.01 – 1.94 (m, 9H), 0.86 (s, 9H), 0.01 (s, 3H), 0.00 (s, 3H).  $^{13}\text{C}$  NMR (126 MHz, Chloroform-*d*)  $\delta$  206.91, 206.89, 206.87, 171.63, 171.59, 169.94, 169.85, 169.36, 169.24, 169.14, 169.01, 164.93, 164.91, 164.89, 161.99, 161.79, 161.75, 161.71, 138.13, 138.08, 137.99, 137.93, 137.88, 137.80, 137.62, 133.91, 133.20, 133.14, 133.09, 129.96, 129.83, 129.68, 129.57, 129.40, 128.49, 128.42, 128.39, 128.36, 128.34, 128.08, 128.05, 128.01, 128.00, 127.96, 127.93, 127.90, 127.78, 127.70, 127.68, 127.65, 127.62, 127.48, 127.41, 127.29, 126.20, 126.13, 125.99, 100.39, 99.87, 99.60, 99.37, 97.39, 92.57, 92.49, 82.39, 79.95, 79.80, 76.79, 76.47, 74.67, 74.15, 74.03, 73.92, 73.79, 73.72, 73.69, 73.60, 73.57, 73.20, 73.09, 72.97, 72.83, 72.68, 72.52, 71.52, 71.33, 69.60, 69.21, 68.69, 68.43, 68.16, 56.41, 52.93, 52.90, 52.38, 38.21, 38.15, 29.83, 29.72, 29.70, 29.68, 28.04, 27.94, 25.73, 20.67, 20.58, -4.14, -5.25. ESI-MS:  $\text{C}_{295}\text{H}_{306}\text{Cl}_{21}\text{N}_7\text{O}_{96}\text{Si}$   $[\text{M}+3\text{NH}_4]^{3+}$  calcd: 2104.4, obsd: 2104.4.

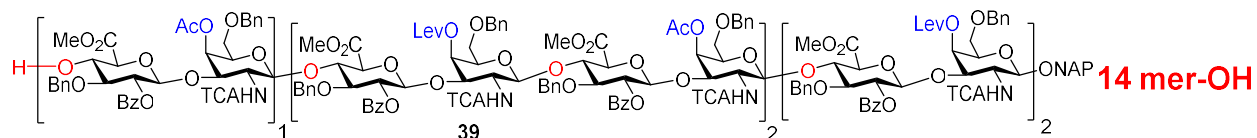

Following the general procedure for TBS removal, tetradecasaccharide acceptor **39** was obtained (0.42 g, 70%) from **38** (0.61 g, 0.097 mmol).  $[\alpha_D^{20}] = -5$  (C = 0.04, DCM).  $^1\text{H}$  NMR (500 MHz, Chloroform-*d*)  $\delta$  8.07 – 7.87 (m, 16H), 7.82 – 7.02 (m, 96H), 6.94 – 6.85 (m, 6H), 6.79 (d,  $J = 7.0$  Hz, 1H), 5.55 – 5.47 (m, 7H), 5.19 – 5.07 (m, 8H), 5.02 (d,  $J = 3.7$  Hz, 1H), 5.01 – 4.88 (m, 9H), 4.87 – 4.67 (m, 16H), 4.62 – 4.50 (m, 11H), 4.37 – 4.05 (m, 26H), 3.97 – 3.85 (m, 14H), 3.81 (t,  $J = 6.2$  Hz, 1H), 3.78 (s, 3H), 3.76 – 3.70 (m, 5H), 3.69 – 3.65 (m, 18H), 3.64 – 3.51 (m, 7H), 3.35 – 3.25 (m, 11H), 3.17 (d,  $J = 2.8$  Hz, 1H), 2.85 – 2.65 (m, 8H), 2.65 – 2.42 (m, 13H), 2.17 (s, 3H), 2.10 – 2.03 (m, 12H), 1.96 (s, 3H), 1.88 (s, 3H).  $^{13}\text{C}$  NMR (126 MHz, Chloroform-*d*)  $\delta$  206.90,

171.57, 169.93, 169.64, 169.32, 164.90, 161.99, 161.73, 161.59, 138.06, 137.96, 137.91, 137.79, 133.18, 133.01, 130.07, 129.96, 129.81, 129.67, 129.55, 128.47, 128.41, 128.37, 128.35, 128.32, 128.26, 128.03, 128.01, 127.99, 127.93, 127.90, 127.76, 127.67, 127.63, 127.39, 127.28, 126.17, 126.11, 125.97, 114.08, 100.02, 99.96, 99.29, 80.54, 79.90, 79.78, 74.21, 73.71, 73.58, 72.52, 71.58, 69.20, 68.13, 64.02, 52.89, 52.81, 38.19, 38.13, 33.84, 31.94, 31.64, 29.82, 29.71, 29.68, 29.66, 29.63, 29.52, 29.38, 29.17, 28.96, 28.01, 27.92, 22.71, 20.65, 14.16. ESI-MS:  $C_{289}H_{292}Cl_{21}N_7O_{96} [M+3NH_4]^{+3}$  calcd: 2065.8, obsd: 2065.7.

#### 16-mer 40:

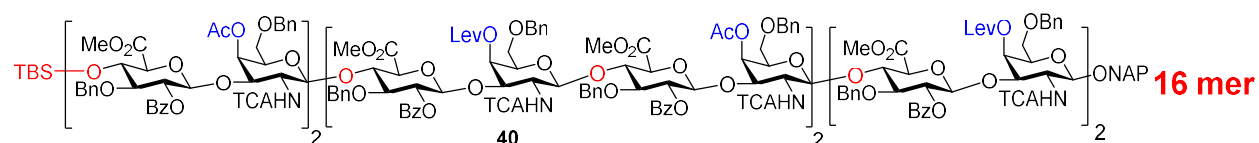

Following the general procedure for glycosylation catalyzed by NIS/TfOH, hexadecasaccharide **40** was obtained (0.39 g, 82%) through coupling between donor **26** (0.143 g, 0.13 mmol) and acceptor **39** (0.42 g, 0.07 mmol).  $[\alpha_D^{20}] = +25$  (C = 0.02, DCM).  $^1H$  NMR (500 MHz, Chloroform-*d*)  $\delta$  8.04 (dd,  $J = 8.2, 1.4$  Hz, 1H), 7.99 – 7.93 (m, 12H), 7.91 – 7.88 (m, 2H), 7.80 – 7.69 (m, 5H), 7.59 – 7.00 (m, 106H), 6.95 – 6.87 (m, 7H), 6.78 (d,  $J = 7.0$  Hz, 1H), 5.53 – 5.47 (m, 7H), 5.29 – 5.24 (m, 2H), 5.16 – 5.08 (m, 7H), 5.01 (s, 1H), 4.99 (d,  $J = 3.6$  Hz, 1H), 4.96 – 4.92 (m, 5H), 4.90 – 4.87 (m, 3H), 4.86 – 4.74 (m, 12H), 4.72 – 4.68 (m, 3H), 4.61 – 4.49 (m, 12H), 4.35 (d,  $J = 3.6$  Hz, 1H), 4.33 – 4.28 (m, 4H), 4.28 – 4.21 (m, 16H), 4.19 – 4.11 (m, 6H), 4.05 (d,  $J = 8.4$  Hz, 1H), 4.00 – 3.97 (m, 2H), 3.96 – 3.84 (m, 13H), 3.80 (d,  $J = 6.2$  Hz, 1H), 3.75 (s, 3H), 3.72 – 3.69 (m, 6H), 3.69 – 3.65 (m, 21H), 3.644 – 3.59 (m, 3H), 3.59 – 3.50 (m, 5H), 3.35 – 3.23 (m, 14H), 2.82 – 2.65 (m, 8H), 2.63 – 2.43 (m, 13H), 2.16 (s, 3H), 2.11 – 2.05 (m, 9H), 1.95 (s, 12H), 0.84 (s, 9H), -0.01 (s, 3H), -0.02 (s, 3H).  $^{13}C$  NMR (126 MHz, Chloroform-*d*)  $\delta$  206.88, 171.58, 169.92, 169.80, 169.32, 169.00, 168.81, 164.90, 161.73, 138.06, 137.96, 137.90, 137.85, 137.78, 133.17, 129.95, 129.80, 129.66, 129.55, 128.47, 128.40, 128.36, 128.34, 128.31, 128.22, 128.06, 128.02, 127.99, 127.92, 127.90, 127.87, 127.83, 127.75, 127.67, 127.62, 127.60, 127.45, 127.38, 127.32, 127.27, 126.17, 126.10, 125.97, 99.95, 99.85, 99.41, 99.33, 79.89, 76.48, 73.70, 73.58, 73.55, 73.53, 72.93, 72.81, 69.19, 64.01, 52.90, 52.89, 38.19, 38.12, 31.93, 31.64, 29.81, 29.70, 29.68, 29.66, 29.52, 29.16, 28.01, 27.91, 25.70, 22.70, 20.65, 20.54, 17.86, 14.15, -4.17, -5.28. ESI-MS:

$C_{333}H_{344}Cl_{24}N_8O_{109}Si$   $[M+3NH_4]^{3+}$  calcd: 2377.8, obsd: 2378.0,  $[M+4NH_4]^{4+}$  calcd: 1787.4, obsd: 1787.4.

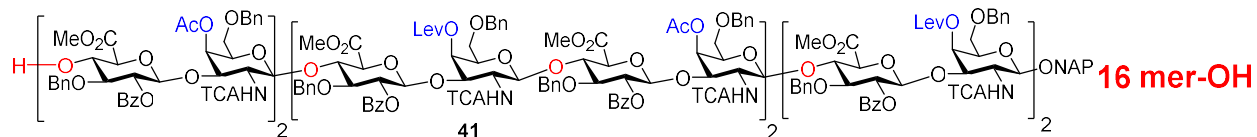

Following the general procedure for TBS removal, hexadecasaccharide acceptor **41** was obtained (0.372 g, 88%) from **40** (0.428 g, 0.061 mmol).  $[\alpha_D^{20}] = -12.5$  (C = 0.04, DCM).  $^1H$  NMR (500 MHz, Chloroform-*d*)  $\delta$  8.09 – 7.89 (m, 17H), 7.82 – 7.01 (m, 110H), 6.93 – 6.83 (m, 7H), 6.78 (d,  $J = 7.0$  Hz, 1H), 5.55 – 5.49 (m, 7H), 5.19 – 5.10 (m, 8H), 5.02 (s, 1H), 5.01 – 4.69 (m, 28H), 4.62 – 4.50 (m, 11H), 4.37 – 4.04 (m, 31H), 3.97 – 3.86 (m, 14H), 3.82 (t,  $J = 6.2$  Hz, 1H), 3.78 (s, 3H), 3.75 – 3.71 (m, 5H), 3.70 – 3.66 (m, 21H), 3.65 – 3.51 (m, 8H), 3.34 – 3.26 (m, 12H), 3.20 (d,  $J = 2.8$  Hz, 1H), 2.85 – 2.68 (m, 7H), 2.67 – 2.46 (m, 13H), 2.17 (s, 3H), 2.10 – 2.08 (m, 6H), 2.01 – 1.94 (m, 12H).  $^{13}C$  NMR (126 MHz, Chloroform-*d*)  $\delta$  206.88, 206.86, 171.58, 169.89, 169.33, 169.12, 169.01, 164.91, 161.73, 138.07, 137.97, 137.92, 137.80, 133.90, 133.18, 133.09, 130.06, 129.96, 129.81, 129.67, 129.56, 128.48, 128.41, 128.38, 128.35, 128.33, 128.26, 128.23, 128.03, 128.00, 127.94, 127.91, 127.89, 127.78, 127.76, 127.67, 127.63, 127.60, 127.47, 127.39, 127.33, 127.28, 126.18, 126.12, 125.98, 100.20, 100.01, 99.54, 99.31, 92.55, 92.47, 80.52, 79.92, 79.79, 76.95, 74.21, 74.15, 74.08, 73.71, 73.59, 73.57, 72.94, 72.83, 72.52, 71.59, 71.33, 69.20, 68.86, 68.69, 68.15, 68.05, 64.03, 55.06, 52.92, 52.89, 52.83, 38.20, 38.13, 31.66, 29.82, 29.71, 29.69, 29.67, 29.52, 28.02, 27.93, 20.65, 14.17. ESI-MS:  $C_{327}H_{330}Cl_{24}N_8O_{109}$   $[M+3NH_4]^{3+}$  calcd: 2339.8, obsd: 2339.8.

#### 18-mer **42**:

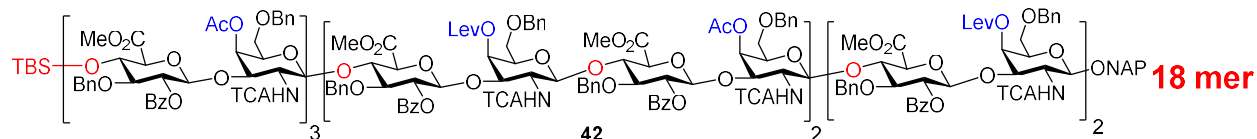

Following the general procedure for glycosylation catalyzed by NIS/TfOH, octadecasaccharide **42** was obtained (0.382 g, 91%) through coupling between donor **26** (0.17 g, 0.16 mmol) and acceptor

**41** (0.372 g, 0.053 mmol).  $[\alpha_D^{20}] = +30$  (C = 0.01, DCM).  $^1\text{H NMR}$  (500 MHz, Chloroform-*d*)  $\delta$  8.01 – 7.95 (m, 15H), 7.93 – 7.91 (m, 2H), 7.82 – 7.72 (m, 5H), 7.59 – 7.53 (m, 9H), 7.49 – 7.23 (m, 66H), 7.21 – 7.04 (m, 45H), 6.97 – 6.88 (m, 8H), 6.80 (d,  $J = 7.1$  Hz, 1H), 5.56 – 5.49 (m, 9H), 5.18 – 5.11 (m, 8H), 5.03 (d,  $J = 2.1$  Hz, 1H), 5.01 (s, 1H), 4.99 – 4.94 (m, 5H), 4.92 – 4.83 (m, 11H), 4.81 – 4.76 (m, 7H), 4.75 – 4.72 (m, 3H), 4.63 – 4.52 (m, 13H), 4.37 – 4.23 (m, 26H), 4.21 – 4.15 (m, 6H), 4.09 – 3.89 (m, 20H), 3.82 (d,  $J = 6.1$  Hz, 1H), 3.77 (s, 3H), 3.75 – 3.72 (m, 5H), 3.71 – 3.67 (m, 24H), 3.66 – 3.55 (m, 8H), 3.37 – 3.26 (m, 16H), 2.85 – 2.46 (m, 23H), 2.17 (s, 3H), 2.12 – 2.08 (m, 9H), 2.02 – 1.92 (m, 15H), 0.87 (s, 9H), 0.02 (s, 3H), 0.01 (s, 3H).  $^{13}\text{C NMR}$  (126 MHz, Chloroform-*d*)  $\delta$  206.89, 206.86, 171.59, 169.94, 169.36, 169.32, 169.14, 169.05, 168.82, 164.93, 164.91, 164.88, 161.75, 138.09, 137.99, 137.93, 137.89, 137.81, 133.21, 129.97, 129.83, 129.57, 128.50, 128.42, 128.39, 128.37, 128.34, 128.09, 128.05, 128.01, 128.00, 127.96, 127.93, 127.88, 127.86, 127.81, 127.78, 127.70, 127.65, 127.62, 127.48, 127.42, 127.35, 127.29, 126.20, 126.14, 125.99, 99.94, 99.60, 99.45, 99.34, 97.41, 82.38, 79.94, 79.81, 76.49, 74.65, 73.94, 73.83, 73.72, 73.61, 73.58, 73.56, 72.97, 72.85, 72.69, 72.54, 71.49, 71.32, 68.88, 68.69, 68.34, 68.17, 56.40, 52.93, 52.90, 52.88, 52.40, 38.21, 38.15, 29.83, 29.71, 29.69, 28.04, 27.94, 25.73, 20.67, -4.14, -5.24. ESI-MS:  $\text{C}_{371}\text{H}_{382}\text{Cl}_{27}\text{N}_9\text{O}_{122}\text{Si}$   $[\text{M}+4\text{NH}_4]^{4+}$  calcd: 1993.7, obsd: 1993.6.

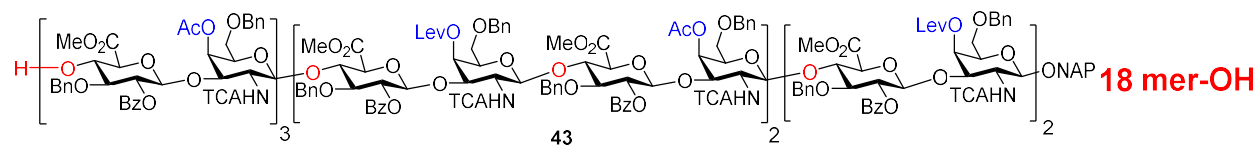

Following the general procedure for TBS removal, octadecasaccharide acceptor **43** was obtained (0.374 g, 95%) from **42** (0.39 g, 0.051 mmol).  $[\alpha_D^{20}] = +5$  (C = 0.06, DCM).  $^1\text{H NMR}$  (500 MHz, Chloroform-*d*)  $\delta$  8.03 – 7.94 (m, 15H), 7.92 – 7.89 (m, 2H), 7.81 – 7.70 (m, 5H), 7.61 – 7.00 (m, 120H), 6.95 – 6.85 (m, 8H), 6.80 (d,  $J = 7.0$  Hz, 1H), 5.55 – 5.47 (m, 9H), 5.19 – 5.10 (m, 9H), 5.02 (s, 1H), 5.00 (s, 1H), 4.98 – 4.69 (m, 29H), 4.61 – 4.50 (m, 11H), 4.37 – 4.21 (m, 26H), 4.20 – 4.13 (m, 5H), 4.11 – 4.06 (m, 2H), 3.99 – 3.87 (m, 16H), 3.83 – 3.79 (m, 2H), 3.77 (s, 3H), 3.75 – 3.70 (m, 8H), 3.70 – 3.66 (m, 24H), 3.64 – 3.52 (m, 7H), 3.35 – 3.25 (m, 15H), 2.86 – 2.45 (m, 22H), 2.16 (s, 6H), 2.11 – 2.06 (m, 9H), 2.03 (s, 3H), 1.98 – 1.94 (m, 9H).  $^{13}\text{C NMR}$  (126 MHz, Chloroform-*d*)  $\delta$  206.90, 171.59, 169.93, 169.13, 169.04, 164.92, 161.74, 138.07, 137.97, 137.80, 130.05, 129.88, 129.56, 128.65, 128.23, 128.07, 127.65, 127.35, 127.08, 100.26, 99.71, 99.69,

92.56, 92.48, 79.89, 74.22, 73.88, 73.71, 73.59, 73.27, 69.01, 68.67, 52.81, 20.60. ESI-MS: C<sub>365</sub>H<sub>368</sub>Cl<sub>27</sub>N<sub>9</sub>O<sub>122</sub> [M+3NH<sub>4</sub>]<sup>3+</sup> calcd: 2614.2, obsd: 2614.1.

**20-mer 44:**

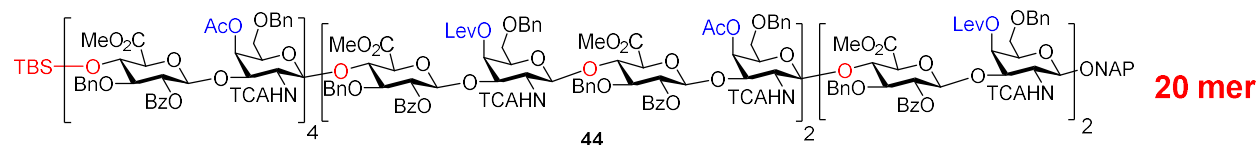

Following the general procedure for glycosylation catalyzed by NIS/TfOH, icosasaccharide **44** was obtained (0.36 g, 86%) through coupling between donor **26** (0.153 g, 0.14 mmol) and acceptor **43** (0.374 g, 0.048 mmol).  $[\alpha_D^{20}] = +2.5$  (C = 0.08, DCM). <sup>1</sup>H NMR (500 MHz, Chloroform-*d*)  $\delta$  8.06 – 7.94 (m, 18H), 7.91 (d, *J* = 7.7 Hz, 2H), 7.81 – 7.70 (m, 6H), 7.59 – 7.00 (m, 131H), 6.94 (m, 9H), 6.82 (d, *J* = 7.1 Hz, 1H), 5.50 (m, 11H), 5.29 – 5.25 (m, 2H), 5.17 – 5.09 (m, 9H), 5.01 (d, *J* = 5.3 Hz, 1H), 4.99 (d, *J* = 1.9 Hz, 1H), 4.97 – 4.81 (m, 19H), 4.79 – 4.70 (m, 11H), 4.60 – 4.53 (m, 11H), 4.52 – 4.50 (m, 1H), 4.36 – 4.31 (m, 6H), 4.30 – 4.21 (m, 21H), 4.20 – 4.13 (m, 7H), 4.08 – 4.03 (m, 2H), 4.02 – 3.87 (m, 19H), 3.83 – 3.79 (m, 2H), 3.76 (s, 3H), 3.73 – 3.70 (m, 8H), 3.69 – 3.65 (m, 27H), 3.65 – 3.61 (m, 3H), 3.60 – 3.54 (m, 4H), 3.36 – 3.23 (m, 18H), 2.82 – 2.44 (m, 23H), 2.16 (s, 3H), 2.11 – 2.05 (m, 9H), 2.00 – 1.88 (m, 18H), 0.85 (s, 9H), 0.00 (s, 3H), -0.01 (s, 3H). <sup>13</sup>C NMR (126 MHz, Chloroform-*d*)  $\delta$  206.89, 206.86, 171.58, 169.93, 169.34, 169.30, 169.12, 169.00, 168.81, 164.91, 161.98, 161.74, 138.08, 137.97, 137.92, 137.87, 137.80, 133.19, 133.13, 129.96, 129.82, 129.67, 129.56, 129.39, 128.47, 128.41, 128.37, 128.35, 128.32, 128.07, 128.04, 128.00, 127.94, 127.91, 127.89, 127.87, 127.84, 127.79, 127.76, 127.68, 127.63, 127.60, 127.47, 127.40, 127.33, 127.27, 126.18, 126.12, 125.98, 99.97, 99.94, 99.92, 99.46, 99.44, 99.33, 92.57, 92.50, 79.79, 74.43, 73.71, 73.59, 73.57, 72.96, 72.84, 72.53, 71.48, 69.18, 68.86, 68.16, 55.06, 52.88, 38.20, 38.13, 29.82, 29.71, 29.69, 28.03, 27.93, 25.71, 20.65, 20.55, 17.88, -4.15, -5.26. MALDI-MS: C<sub>409</sub>H<sub>420</sub>Cl<sub>30</sub>N<sub>10</sub>O<sub>135</sub>Si [M+H]<sup>+</sup> calcd: 8719.7, obsd: 8719.1.

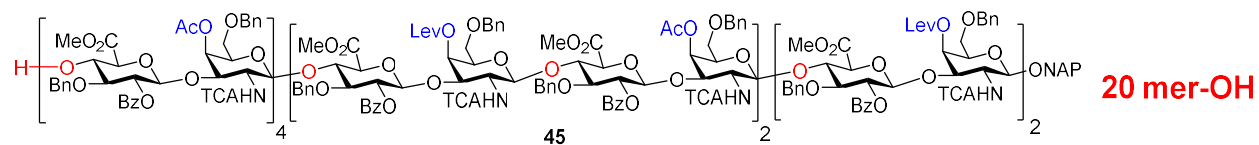

Following the general procedure for TBS removal, icosasaccharide acceptor **45** was obtained (0.33 g, 94%) from **44** (0.356 g, 0.041 mmol).  $[\alpha_D^{20}] = +20$  (C = 0.01, DCM).  $^1\text{H}$  NMR (500 MHz, Chloroform-*d*)  $\delta$  8.07 – 7.03 (m, 158H), 6.94 – 6.84 (m, 9H), 6.81 (d,  $J = 7.0$  Hz, 1H), 5.56 – 5.47 (m, 10H), 5.21 – 5.09 (m, 11H), 5.03 (s, 1H), 5.01 (d,  $J = 2.1$  Hz, 1H), 4.99 – 4.70 (m, 32H), 4.62 – 4.51 (m, 12H), 4.36 – 4.17 (m, 33H), 4.16 – 4.06 (m, 5H), 3.99 – 3.88 (m, 18H), 3.84 – 3.80 (m, 2H), 3.78 (s, 3H), 3.74 – 3.71 (m, 6H), 3.71 – 3.67 (m, 27H), 3.65 – 3.55 (m, 7H), 3.37 – 3.25 (m, 18H), 2.85 – 2.44 (m, 23H), 2.18 – 1.96 (m, 30H).  $^{13}\text{C}$  NMR (126 MHz, Chloroform-*d*)  $\delta$  206.89, 171.58, 169.92, 169.35, 169.13, 169.03, 164.92, 161.75, 138.09, 137.99, 137.93, 137.81, 133.20, 130.07, 129.97, 129.83, 129.58, 128.42, 128.38, 128.33, 128.26, 128.05, 128.03, 128.01, 127.99, 127.95, 127.92, 127.90, 127.89, 127.80, 127.77, 127.68, 127.64, 127.61, 127.48, 127.40, 127.34, 127.29, 126.19, 126.13, 125.99, 100.21, 99.99, 99.57, 99.39, 99.37, 80.53, 79.94, 79.79, 74.66, 74.44, 74.22, 74.16, 73.89, 73.72, 73.69, 73.60, 73.57, 72.94, 72.53, 71.33, 68.86, 68.70, 55.08, 52.90, 38.21, 38.14, 29.71, 29.69, 28.04, 27.94, 20.66. MALDI-MS:  $\text{C}_{403}\text{H}_{406}\text{Cl}_{30}\text{N}_{10}\text{O}_{135}$   $[\text{M}+\text{H}]^+$  calcd: 8594.6, obsd: 8594.5.

#### 22-mer **46**:

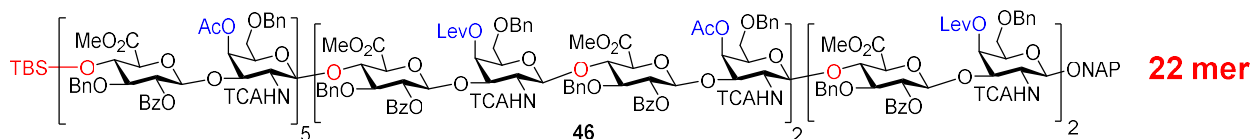

Following the general procedure for glycosylation catalyzed by NIS/TfOH, docosaccharide **46** was obtained (0.347 g, 95%) through coupling between donor **26** (0.123 g, 0.12 mmol) and acceptor **45** (0.33 g, 0.038 mmol).  $[\alpha_D^{20}] = -20$  (C = 0.04, DCM).  $^1\text{H}$  NMR (500 MHz, Chloroform-*d*)  $\delta$  8.07 – 7.94 (m, 21H), 7.91 (d,  $J = 7.7$  Hz, 2H), 7.81 – 7.71 (m, 6H), 7.56 (m, 11H), 7.47 – 7.36 (m, 29H), 7.34 – 7.24 (m, 49H), 7.12 (m, 55H), 6.91 (m, 10H), 6.79 (d,  $J = 7.0$  Hz, 1H), 5.55 – 5.48 (m, 11H), 5.30 – 5.26 (m, 2H), 5.17 – 5.09 (m, 11H), 5.02 (s, 1H), 5.00 (s, 1H), 4.97 – 4.94 (m, 4H), 4.93 – 4.86 (m, 11H), 4.85 – 4.81 (m, 4H), 4.80 – 4.71 (m, 13H), 4.61 – 4.50 (m, 15H), 4.36 – 4.31 (m, 8H), 4.30 – 4.22 (m, 24H), 4.20 – 4.15 (m, 7H), 4.0 – 4.03 (m, 2H), 4.02 – 3.89 (m, 21H), 3.82 (t,  $J = 6.1$  Hz, 2H), 3.76 (s, 3H), 3.74 – 3.71 (m, 7H), 3.70 – 3.66 (m, 30H), 3.63 – 3.54 (m, 7H), 3.35 – 3.24 (m, 20H), 2.84 – 2.66 (m, 10H), 2.64 – 2.47 (m, 14H), 2.16 (s, 3H), 2.10 – 2.07 (m, 9H), 2.01 – 1.90 (m, 21H), 0.86 (s, 9H), 0.01 (s, 3H), -0.00 (s, 3H).  $^{13}\text{C}$  NMR (126 MHz, Chloroform-*d*)  $\delta$  206.89, 171.59, 169.93, 169.88, 169.35, 169.13, 169.04, 164.93, 164.90,



161.99, 161.75, 138.08, 137.98, 137.92, 137.88, 137.80, 133.20, 129.96, 129.82, 129.56, 128.48, 128.41, 128.38, 128.35, 128.33, 128.08, 128.04, 128.00, 127.99, 127.95, 127.93, 127.90, 127.88, 127.85, 127.80, 127.77, 127.69, 127.63, 127.47, 127.41, 127.34, 127.28, 126.19, 126.13, 125.98, 99.94, 99.94, 99.45, 99.32, 97.38, 92.49, 79.80, 76.69, 74.43, 73.71, 73.60, 73.56, 72.95, 72.84, 72.52, 71.48, 71.32, 69.18, 68.86, 68.68, 68.15, 55.09, 52.89, 38.20, 38.13, 29.82, 29.71, 29.69, 28.03, 27.93, 25.72, 20.66, -4.15, -5.26. MALDI-MS:  $C_{447}H_{458}Cl_{33}N_{11}O_{148}Si$   $[M+H]^+$  calcd: 9529.8, obsd: 9529.8.

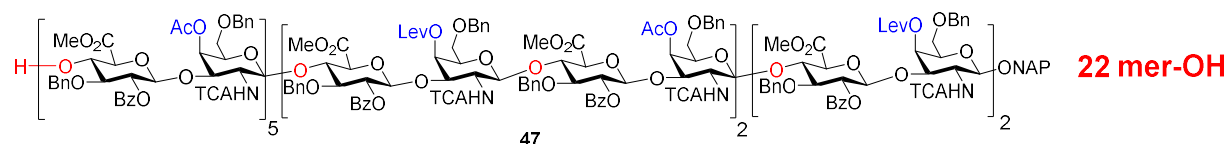

Following the general procedure for TBS removal, docosasaccharide acceptor **47** was obtained (0.29 g, 90%) from **46** (0.326 g, 0.034 mmol).  $[\alpha_D^{20}] = -3.3$  ( $C = 0.06$ , DCM).  $^1H$  NMR (500 MHz, Chloroform-*d*)  $\delta$  8.04 – 7.02 (m, 172H), 6.98 – 6.89 (m, 10H), 6.81 (d,  $J = 7.0$  Hz, 1H), 5.55 – 5.46 (m, 11H), 5.19 – 5.08 (m, 12H), 5.02 (s, 1H), 5.00 (d,  $J = 2.2$  Hz, 1H), 4.97 – 4.69 (m, 35H), 4.61 – 4.51 (m, 13H), 4.36 – 4.06 (m, 42H), 3.99 – 3.87 (m, 19H), 3.83 – 3.79 (m, 2H), 3.78 (s, 3H), 3.74 – 3.70 (m, 7H), 3.70 – 3.66 (m, 30H), 3.64 – 3.53 (m, 7H), 3.38 – 3.23 (m, 21H), 2.85 – 2.44 (m, 24H), 2.17 (s, 3H), 2.11 – 2.07 (m, 15H), 2.03 (s, 3H), 1.98 – 1.95 (m, 12H).  $^{13}C$  NMR (126 MHz, Chloroform-*d*)  $\delta$  206.90, 171.59, 169.95, 169.90, 169.34, 169.13, 169.03, 164.95, 161.76, 138.07, 137.96, 137.91, 137.79, 133.20, 130.06, 129.96, 129.82, 129.57, 128.48, 128.41, 128.38, 128.33, 128.26, 128.03, 128.00, 127.94, 127.92, 127.90, 127.79, 127.77, 127.68, 127.64, 127.61, 127.40, 127.34, 127.28, 126.18, 126.12, 125.98, 99.95, 99.57, 99.42, 99.37, 92.48, 80.54, 79.90, 79.76, 76.94, 76.69, 74.66, 74.22, 74.13, 73.91, 73.71, 73.59, 73.56, 72.54, 71.56, 71.33, 68.84, 68.68, 68.12, 56.39, 55.07, 52.89, 52.84, 38.20, 38.12, 29.82, 29.71, 29.69, 28.03, 27.93, 20.65. MALDI-MS:  $C_{441}H_{444}Cl_{33}N_{11}O_{148}$   $[M+H]^+$  calcd: 9437.7, obsd: 9437.6.

#### 24-mer **48**:

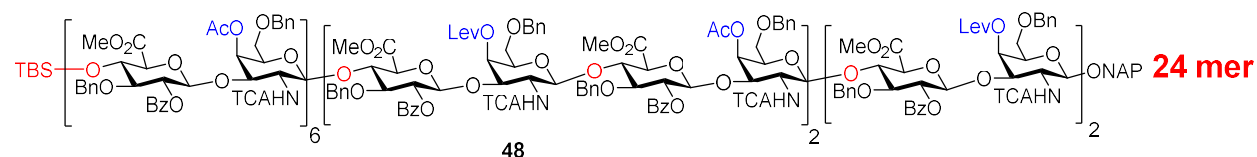

Following the general procedure for glycosylation catalyzed by NIS/TfOH, tetracosasaccharide **48** was obtained (0.287 g, 90%) through coupling between donor **26** (0.098 g, 0.092 mmol) and acceptor **47** (0.29 g, 0.031 mmol).  $[\alpha_D^{20}] = -40$  (C = 0.01, DCM).  $^1\text{H NMR}$  (500 MHz, Chloroform-*d*)  $\delta$  8.06 – 7.04 (m, 188H), 6.95 – 6.86 (m, 11H), 6.78 (d,  $J = 7.0$  Hz, 1H), 5.55 – 5.46 (m, 12H), 5.29 – 5.25 (m, 2H), 5.17 – 5.9 (m, 11H), 5.02 (s, 1H), 5.00 (d,  $J = 2.6$  Hz, 1H), 4.98 – 4.69 (m, 38H), 4.61 – 4.51 (m, 15H), 4.36 – 4.14 (m, 43H), 4.08 – 3.86 (m, 26H), 3.83 – 3.79 (m, 2H), 3.76 (s, 3H), 3.73 – 3.70 (m, 7H), 3.70 – 3.66 (m, 33H), 3.63 – 3.54 (m, 8H), 3.35 – 3.24 (m, 20H), 2.83 – 2.46 (m, 24H), 2.17 – 2.13 (m, 6H), 2.11 – 2.06 (m, 9H), 1.99 – 1.92 (m, 21H), 0.85 (s, 9H), 0.00 (m, 3H), -0.01 (m, 3H).  $^{13}\text{C NMR}$  (126 MHz, Chloroform-*d*)  $\delta$  206.88, 171.58, 169.92, 169.87, 169.11, 169.02, 164.92, 161.74, 138.08, 137.97, 137.92, 137.80, 133.19, 129.96, 129.56, 128.41, 128.37, 128.35, 128.32, 128.07, 128.04, 128.00, 127.98, 127.94, 127.92, 127.89, 127.87, 127.84, 127.79, 127.76, 127.68, 127.62, 127.40, 127.33, 127.28, 126.19, 125.98, 99.94, 99.94, 99.54, 99.42, 92.48, 79.92, 79.81, 79.80, 76.68, 74.42, 73.71, 73.59, 73.55, 72.95, 72.83, 68.85, 68.14, 55.10, 52.89, 38.20, 38.13, 29.71, 29.68, 27.93, 25.71, 20.65, -5.26. MALDI-MS:  $\text{C}_{485}\text{H}_{496}\text{Cl}_{36}\text{N}_{12}\text{O}_{161}\text{Si}$   $[\text{M}+\text{H}]^+$  calcd: 10349.9, obsd: 10348.3.

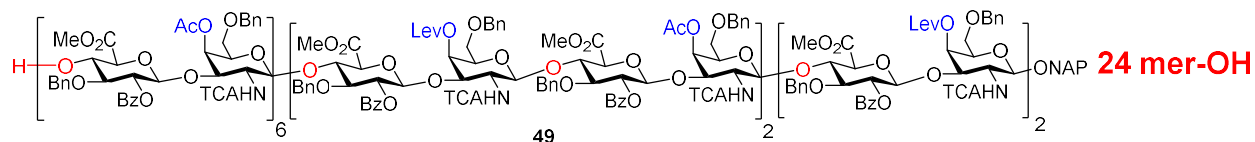

Following the general procedure for TBS removal, tetracosasaccharide acceptor **49** was obtained (0.293 g, 94%) from **48** (0.287 g, 0.028 mmol).  $[\alpha_D^{20}] = -10$  (C = 0.01, DCM).  $^1\text{H NMR}$  (500 MHz, Chloroform-*d*)  $\delta$  8.04 – 7.05 (m, 188H), 6.99 – 6.90 (m, 11H), 6.86 (d,  $J = 7.1$  Hz, 1H), 5.54 – 5.46 (m, 11H), 5.15 (m, 12H), 5.02 (s, 1H), 5.00 (d,  $J = 3.0$  Hz, 1H), 4.97 – 4.69 (m, 39H), 4.59 – 4.50 (m, 14H), 4.36 – 4.12 (m, 44H), 4.09 – 4.06 (m, 2H), 3.99 – 3.87 (m, 22H), 3.82 – 3.79 (m, 2H), 3.77 (s, 3H), 3.73 – 3.70 (m, 8H), 3.69 – 3.65 (m, 33H), 3.64 – 3.55 (m, 9H), 3.35 – 3.21 (m, 22H), 2.82 – 2.45 (m, 24H), 2.17 – 1.94 (m, 36H).  $^{13}\text{C NMR}$  (126 MHz, Chloroform-*d*)  $\delta$  206.90, 171.58, 169.87, 169.10, 169.02, 164.92, 162.66, 161.75, 138.08, 137.97, 137.92, 137.80, 133.18, 129.96, 129.82, 129.58, 128.41, 128.37, 128.32, 128.25, 128.04, 128.02, 128.00, 127.98, 127.93, 127.91, 127.89, 127.78, 127.67, 127.63, 127.38, 127.33, 127.25, 126.18, 126.11, 125.98, 99.99, 99.97, 99.96, 99.93, 99.45, 99.44, 99.39, 92.50, 79.78, 76.67, 74.44, 74.18, 73.92, 73.71, 73.59, 73.56, 71.61, 68.84, 68.14, 55.06, 52.88, 38.20, 38.13, 36.55, 31.50, 29.81, 29.71, 29.69, 27.92,

20.65. ESI-MS: C<sub>479</sub>H<sub>482</sub>Cl<sub>36</sub>N<sub>12</sub>O<sub>161</sub> [M+5NH<sub>4</sub>]<sup>5+</sup> calcd: 2068.8, obsd: 2068.8, [M+4NH<sub>4</sub>]<sup>4+</sup> calcd: 2582.7, obsd: 2582.7, [M+3NH<sub>4</sub>]<sup>3+</sup> calcd: 3437.7, obsd: 3437.5.

### 1.11. Sulfation and deprotection of the 24-mer 49:

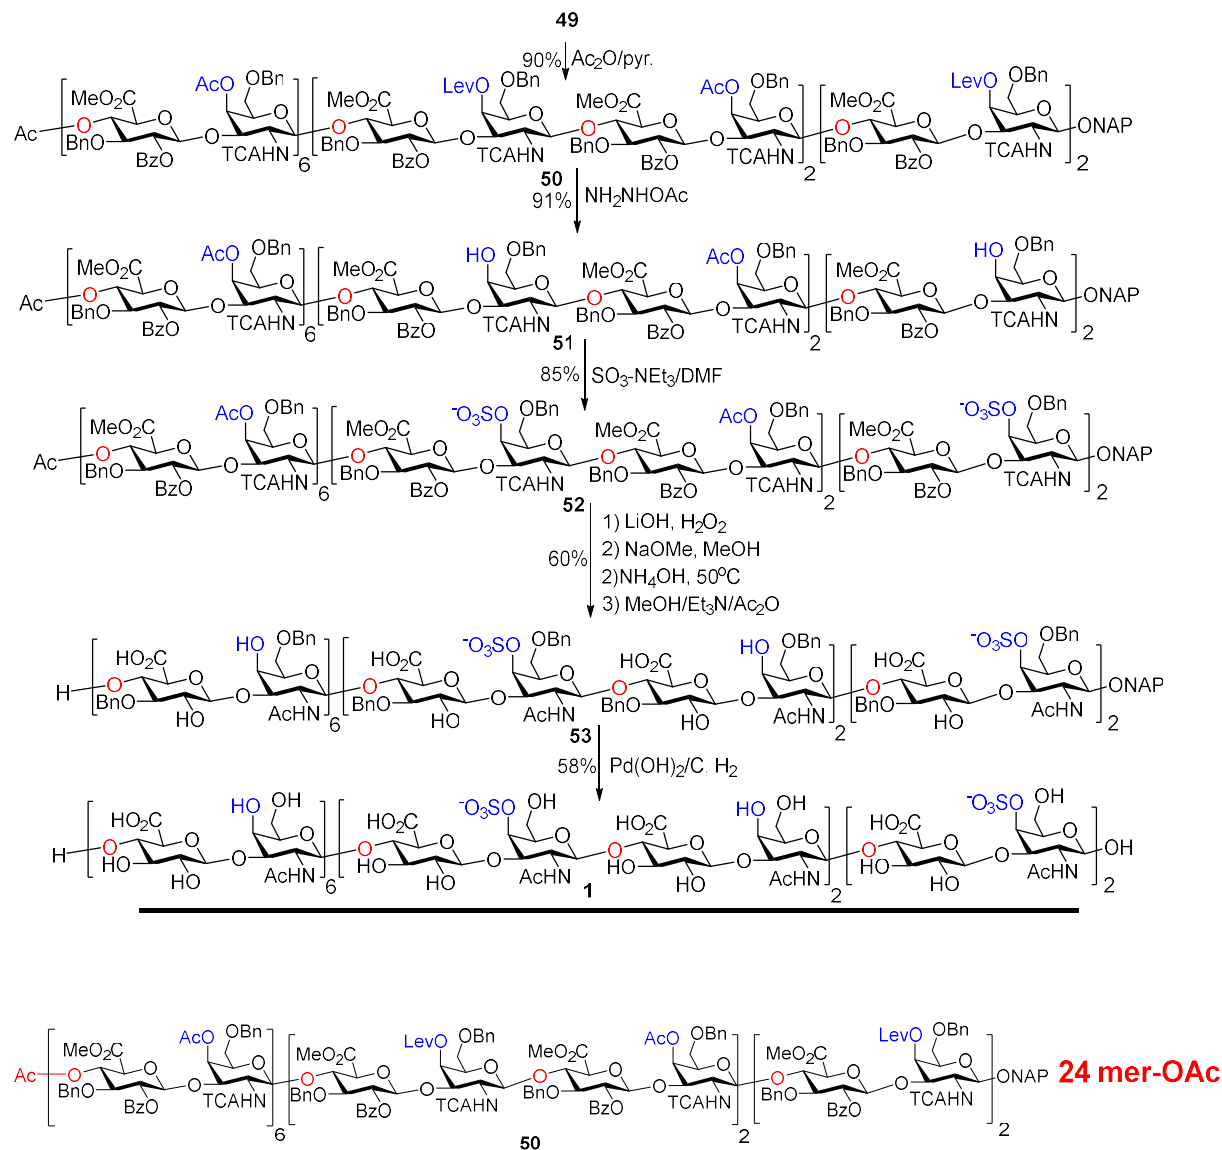

Compound **49** (121 mg, 11.7  $\mu\text{m}$ ) was dissolved in Py. (4 mL), followed by addition of Ac<sub>2</sub>O (2 mL). The reaction mixture was stirred at rt till completion. Then the mixture was diluted with EtOAc (40 mL), washed with 10% HCl (3\*10 mL), saturated NaHCO<sub>3</sub> solution (2\*10 mL), saturated brine solution (10 mL). The organic layer was dried over Na<sub>2</sub>SO<sub>4</sub>, concentrated and the residue was introduced to silica gel column chromatography (Toluene/Acetone, 15:1  $\rightarrow$  6:1) to afford the desired tetracosasaccharide **50** (0.109 g, 90%) as a white solid.  $[\alpha_D^{20}] = -15$  (C = 0.02,

DCM).  $^1\text{H}$  NMR (500 MHz, Chloroform-*d*)  $\delta$  8.18 – 6.99 (m, 187H), 6.92 (dd,  $J = 17.0, 7.9$  Hz, 11H), 6.80 (d,  $J = 7.1$  Hz, 1H), 5.50 (d,  $J = 10.6$  Hz, 12H), 5.35 – 5.26 (m, 5H), 5.13 (q,  $J = 9.1, 8.0$  Hz, 11H), 5.03 (s, 1H), 5.00 (s, 1H), 4.98 – 4.70 (m, 35H), 4.62 – 4.51 (m, 15H), 4.38 – 4.11 (m, 43H), 4.01 – 3.86 (m, 22H), 3.83 – 3.79 (m, 2H), 3.76 – 3.62 (m, 47H), 3.62 – 3.52 (m, 7H), 3.37 – 3.22 (m, 21H), 2.82 – 2.44 (m, 24H), 2.18 – 2.03 (m, 21H), 2.01 – 1.94 (m, 18H).  $^{13}\text{C}$  NMR (126 MHz, Chloroform-*d*)  $\delta$  206.88, 171.58, 169.87, 169.10, 164.92, 161.74, 138.08, 137.98, 137.93, 137.81, 133.19, 130.06, 129.96, 129.58, 128.41, 128.38, 128.33, 128.27, 128.04, 128.00, 127.94, 127.91, 127.89, 127.79, 127.77, 127.67, 127.64, 127.61, 127.40, 127.33, 127.28, 126.19, 126.12, 125.98, 99.96, 99.57, 99.55, 99.42, 99.40, 92.49, 79.79, 74.42, 74.07, 73.89, 73.71, 73.60, 73.56, 72.93, 72.67, 72.53, 71.32, 69.20, 68.85, 68.69, 68.14, 55.10, 52.88, 38.20, 38.14, 29.71, 29.68, 27.93, 20.65, 14.17. MALDI-MS:  $\text{C}_{481}\text{H}_{484}\text{Cl}_{36}\text{N}_{12}\text{O}_{162}$   $[\text{M}+\text{NH}_4]^+$  calcd: 10315.9, obsd: 10315.9.

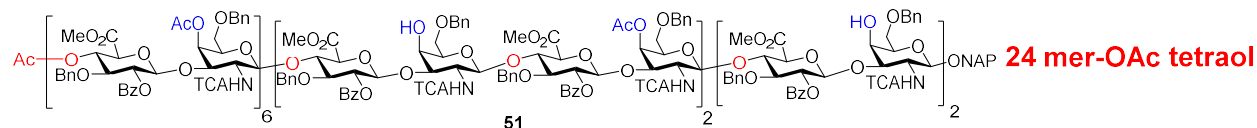

Tetracosasaccharide **50** (238 mg, 23.1  $\mu\text{mol}$ ) was dissolved in THF/MeOH (10:1, 4.4 mL). The mixture was cooled to 0  $^\circ\text{C}$  then hydrazine acetate ( $\text{NH}_2\text{NHOAc}$ ) (26 mg, 0.28 mmol) was added. The mixture was stirred at 0  $^\circ\text{C}$  for 2 h. Upon completion, the reaction was quenched with acetone (0.2 mL), stirred for another 0.5-1 h from 0  $^\circ\text{C}$  to r.t. and then, the solvent was evaporated under vacuum. The residue was diluted with EtOAc, washed with saturated  $\text{NaHCO}_3$  solution, 10% HCl, water. The organic layer was dried over  $\text{Na}_2\text{SO}_4$ , concentrated in vacuo and the residue was purified with silica gel chromatography (DCM/MeOH, 40:1  $\rightarrow$  15:1) to give tetraol **51** as a white solid (0.208 g, 91%).  $[\alpha_D^{20}] = +5.7$  ( $C = 0.07$ , DCM).  $^1\text{H}$  NMR (500 MHz, Chloroform-*d*)  $\delta$  8.09 – 7.00 (m, 188H), 6.92 – 6.78 (m, 12H), 5.55 – 5.38 (m, 11H), 5.33 – 5.24 (m, 4H), 5.22 – 5.10 (m, 12H), 5.02 (s, 1H), 4.99 (d,  $J = 7.8$  Hz, 2H), 4.95 – 4.81 (m, 20H), 4.78 – 4.69 (m, 12H), 4.64 – 4.50 (m, 16H), 4.39 – 4.35 (m, 5H), 4.33 – 4.15 (m, 36H), 4.13 – 4.01 (m, 12H), 3.99 – 3.85 (m, 16H), 3.85 – 3.76 (m, 11H), 3.75 – 3.57 (m, 52H), 3.47 – 3.41 (m, 4H), 3.35 (d,  $J = 3.6$  Hz, 1H), 3.31 – 3.19 (m, 16H), 3.09 – 3.02 (m, 3H), 2.04 – 1.89 (m, 27H).  $^{13}\text{C}$  NMR (126 MHz, Chloroform-*d*)  $\delta$  165.07, 164.91, 138.06, 137.79, 133.17, 133.13, 130.01, 129.95, 129.58, 128.43, 128.36, 128.25, 128.05, 127.99, 127.97, 127.90, 127.87, 127.85, 127.81, 127.77, 127.69, 127.66, 127.64, 127.59, 127.47, 127.32, 126.00, 79.77, 78.85, 73.86, 73.59, 73.54, 73.49, 72.91, 55.11, 52.88,

52.86, 29.71, 20.62. ESI-MS:  $C_{461}H_{460}Cl_{36}N_{12}O_{154}$   $[M+4NH_4]^{4+}$  calcd: 2495.7, obsd: 2495.7,  $[M+3NH_4]^{3+}$  calcd: 3320.9, obsd: 3320.8.

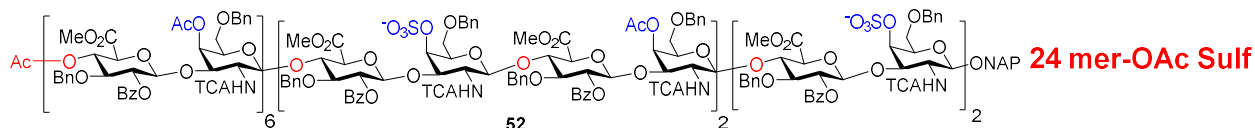

Compound **51** (73.6 mg, 7.4  $\mu$ mol) was dissolved in anhydrous DMF (1.5 mL), followed by addition of  $SO_3-NEt_3$  (215.4 mg, 1.19 mmol). The resulting mixture was stirred at 50  $^{\circ}C$  for 1d. After cooling down to room temperature, it was diluted with MeOH-DCM (0.5 mL) and subjected into LH-20 column chromatography (DCM/MeOH, 1:1) for purification to provide compound **52** as a white solid (60 mg, 85%).  $[\alpha_D^{20}] = -10$  ( $C = 0.01$ , DCM).  $^1H$  NMR (500 MHz, Chloroform-*d*)  $\delta$  8.14 – 6.88 (m, 188H), 5.40 – 5.28 (m, 8H), 5.26 – 5.17 (m, 6H), 5.10 – 5.00 (m, 10H), 4.97 (m, 3H), 4.94 – 4.79 (m, 16H), 4.74 – 4.46 (m, 35H), 4.29 – 3.88 (m, 68H), 3.78 – 3.52 (m, 53H), 3.39 – 3.34 (m, 4H), 3.28 – 3.08 (m, 17H), 2.77 (m, 11H), 2.01 (s, 6H), 1.95 – 1.82 (m, 21H).  $^{13}C$  NMR (126 MHz, Chloroform-*d*)  $\delta$  170.39, 169.28, 165.19, 165.17, 165.17, 137.99, 137.99, 137.64, 137.58, 137.58, 129.94, 129.56, 128.33, 128.31, 128.22, 128.17, 128.03, 127.94, 127.88, 127.86, 127.82, 127.76, 127.69, 127.65, 127.56, 127.39, 127.39, 127.29, 126.04, 126.04, 125.95, 125.92, 99.67, 99.64, 99.55, 99.53, 79.39, 74.63, 73.50, 73.36, 69.11, 68.71, 62.32, 62.29, 61.97, 52.86, 52.79, 52.66, 49.86, 49.69, 49.52, 49.35, 49.17, 49.01, 48.83, 45.40, 34.15, 34.04, 33.99, 31.69, 29.65, 29.48, 29.46, 29.38, 29.18, 29.15, 29.03, 28.98, 25.27, 25.22, 24.79, 22.53, 21.24, 20.83, 20.63, 20.52, 14.00. ESI-MS:  $C_{461}H_{456}Cl_{36}N_{12}O_{166}S_4$   $[M-4H]^{4+}$  calcd: 2556.1, obsd: 2556.2,  $[M+NH_4-3H]^{3+}$  calcd: 3413.5, obsd: 3413.6.

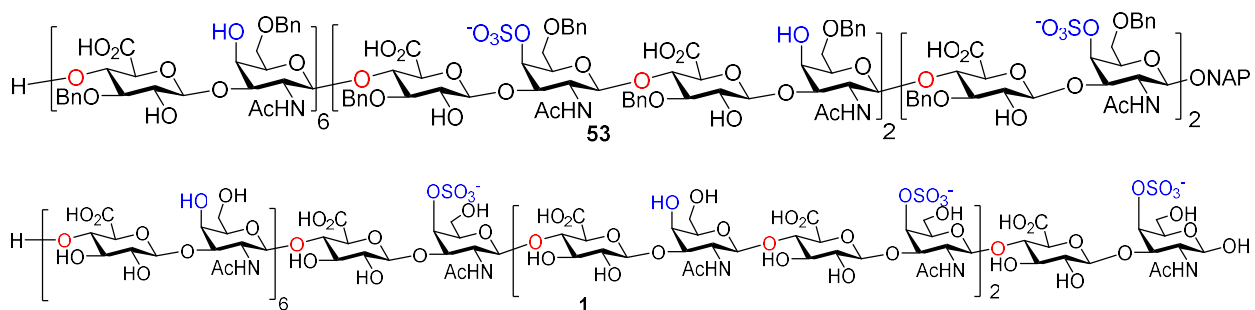

Compound **52** (24.65 mg, 2.4  $\mu$ mol) was dissolved in [THF:H<sub>2</sub>O, 4:1 (1 mL)], then a mixture of LiOH (1 M) (15 equiv. per CO<sub>2</sub>Me) and H<sub>2</sub>O<sub>2</sub> (2:1) was added at 0  $^{\circ}C$  and the reaction mixture was stirred at r.t. over night. The reaction was monitored by mass spectrometer to ensure the

hydrolysis of all methyl esters. The crude was neutralized with 0.1 M HCl till PH=7, concentrated and passed through LH-20. Then the product was dissolved in MeOH, NaOMe was added till pH=9 and the mixture was heated at 50 °C till cleavage of all ester protected groups (MS shows incompleteness of TCA cleavage). After passing through LH-20, it was dissolved in concentrated aqueous NH<sub>4</sub>OH and heated at 50 °C for 2d, till cleavage of all TCA protected groups. The mixture was concentrated, then dissolved in MeOH:Et<sub>3</sub>N:Ac<sub>2</sub>O (0.5 mL:200 μL:100 μL) and the mixture was stirred at rt for 2 h, evaporated to dryness and the residue was passed through LH-20 to obtain **53** (10.4 mg, 60% yield over 4 steps). ESI-MS: C<sub>347</sub>H<sub>402</sub>N<sub>12</sub>O<sub>145</sub>S<sub>4</sub><sup>4+</sup> [M-4H]<sup>4+</sup> calcd: 1797.3, obsd: 1797.3, [M+5Li-5H-4H]<sup>4+</sup> calcd: 1804.6, obsd: 1804.6, [M-3H]<sup>3-</sup> calcd: 1437.5, obsd: 1437.5, [M+5Li-5H-3H]<sup>3-</sup> calcd: 1443.3, obsd: 1443.3. The 24-mer **53** (10.4 mg, 1.4 μmol) was dissolved in a mixture of EtOH/H<sub>2</sub>O (1 mL / 1 mL). Then Pd(OH)<sub>2</sub>/C (32 mg, 10-20%) was added and the flask was flushed with nitrogen. A hydrogen balloon was placed on the flask and the flask was subjected to vacuum and hydrogen gas 5 times to put the reactant under a hydrogen atmosphere. The reaction was vigorously stirred. After reaction completion as indicated by mass spectrometer, the product mixture was filtered through Celite and washed with EtOH/water 1:2 (3x2 mL). The combined filtrate was then evaporated and purified by a short Sephadex G-15 column to give the final 24-mer **1** (4.1 mg, 58%) as a glassy solid. [ $\alpha_D^{20}$ ] = +10 (C = 0.05, DCM). <sup>1</sup>H NMR (500 MHz, Deuterium Oxide) δ 5.07 – 5.04 (m, 3H), 4.59 – 4.56 (m, 5H), 4.53 – 4.48 (m, 5H), 4.40 – 4.30 (m, 22H), 3.99 – 3.97 (m, 3H), 3.95 – 3.91 (m, 8H), 3.87 – 3.79 (m, 18H), 3.69 – 3.57 (m, 56H), 3.55 – 3.52 (m, 10H), 3.47 – 3.41 (m, 14H), 3.34 – 3.29 (m, 6H), 3.25 – 3.13 (m, 18H), 1.905 – 1.79 (m, 36H). <sup>13</sup>C NMR (126 MHz, Deuterium Oxide), based on HSQC: δ 103.96, 100.98, 80.136, 79.22, 75.15, 74.92, 74.47, 73.78, 72.18, 71.49, 69.48, 67.88, 67.42, 62.67, 60.83, 50.87. ESI-MS: C<sub>168</sub>H<sub>250</sub>N<sub>12</sub>O<sub>145</sub>S<sub>4</sub><sup>4+</sup> [M-3SO<sub>3</sub>+2Na-4H]<sup>3-</sup> calcd: 1563.8, obsd: 1563.7, [M-4H]<sup>4+</sup> calcd: 1221.3, obsd: 1221., [M-SO<sub>3</sub><sup>-</sup>-4H]<sup>4+</sup> calcd: 1200.8, obsd: 1200.8, [M-2SO<sub>3</sub><sup>-</sup>-7H+NH<sub>4</sub>+2Na]<sup>4+</sup> calcd: 1196.3, obsd: 1196.3, [M-2SO<sub>3</sub><sup>-</sup>-6H+3Na]<sup>5-</sup> calcd: 957.8, obsd: 957.9, [M-3SO<sub>3</sub><sup>-</sup>-6H+NH<sub>4</sub>+Na]<sup>5-</sup> calcd: 939.9, obsd: 939.9.

**Enzyme digestion and deglycosylation of bikunin PG:** Bikunin (41.6 mg) was dissolved with 1 U of chondroitinase ABC (Sigma C2905) in reaction buffer (0.1 M Tris-HCl, 30 mM sodium acetate, pH 8.0, 20 mL). The mixture was incubated at 37 °C and the reaction progress was monitored by SDS-PAGE. After 48 h, the crude mixture was purified and concentrated using 10 KDa MWCO centrifugal filters against PBS buffer and centrifuged at 4000 rpm for 30 min. The process was repeated at least three times. The resulting core protein was quantified using Bradford assay (BSA as standard) to give the bikunin core protein (9.7 mg).

**Figure S1.** SDS-PAGE of proteolytic cleavage of CS from bikunin. Lanes: 1, commercial chondroitinase ABC (Sigma C2905); 2, intact bikunin; 3, product after cleavage of CS. The gel was run under non-reducing conditions and stained by Coomassie blue for visualization.

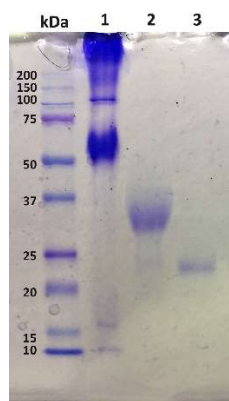

#### **Preparation of bikunin CS chain:**

The bikunin proteoglycan (7 mg) was digested with 5% (w/w) actinase E at pH 7.5 in 50 mM tris-HCl in sodium acetate buffer. The mixture was incubated at 45 °C for 18 h. The CS chain was isolated from the digestion mixture through strong-anion exchange spin column chromatography. First, the spin column was equilibrated with 50 mM NaCl, then the reaction mixture was diluted with 50 mM NaCl and loaded into the column using centrifugation at 500g. The column was then washed three times with 50 mM NaCl, then eluted with 1.5 M NaCl. The fractions collected were concentrated and desalted using 10 KDa MWCO centrifugal filter with deionized water. The resulting concentrate was collected and lyophilized to afford the bikunin CS (2.7 mg). The CS chain was characterized using <sup>1</sup>H-NMR and ESI-MS.

**Anti-inflammatory activity measurement:**

Mouse macrophage cells (RAW264.7) were used for the determination of anti-inflammatory effects of 24-mer **1**, CS-A polysaccharide, bikunin CS, bikunin core protein and bikunin proteoglycan. As the bikunin core protein was generated by chondroitinase ABC mediated digestion of bikunin proteoglycan, chondroitinase ABC was incubated with RAW264.7 cells, which did not lead to significant amounts of TNF- $\alpha$  over the background, suggesting the chondroitinase ABC itself is not inflammatory.

**Preparation of macrophage and cell culture treatment:**

Raw 264.7 murine macrophage cells were plated in 100mm cell culture dish in 10 mL of growth medium (Dulbecco's Modified Eagle Medium (Gibco) with 10% fetal bovine serum and 1% Pen/Strep (Gibco)). The cells were incubated at 37 °C in a humidified atmosphere with 5% CO<sub>2</sub>, harvested for use by Versene solution (Gibco), and seeded at  $0.4 \times 10^6$  cells/well in 96-well plates.

After incubation overnight, the nonadherent cells and the medium was removed. FBS free medium containing 24-mer **1**, CS-A polysaccharide, bikunin CS, core protein and Bikunin were added and incubated for 1 h, which were followed by stimulation of LPS (*E. coli*, Sigma) at 100 ng/mL for 24 h. The growth medium from each well was harvested for the measurement of the amount of TNF- $\alpha$  generated.

**Quantitative enzyme-linked immunosorbent assay (ELISA) for TNF- $\alpha$  quantification:**

Mouse TNF- $\alpha$  uncoated ELISA kit was purchased from Thermo-Fisher scientific.

**a- Reagent preparation:**

- **Wash Buffer:** 1X PBS, 0.05% Tween-20 wash buffer.
- **Stop Solution:** 1M H<sub>3</sub>PO<sub>4</sub>.
- **Coating buffer:** make a 1:10 dilution of PBS in deionized water.
- **Capture Antibody:** dilute capture antibody (250X) in coating buffer (1X).
- **5X ELISA/ELISASPOT Diluent:** dilute diluent concentrate 1:5 in deionized water.
- **Detection Antibody:** dilute detection antibody 1:250 in ELISA/ELISASPOT Diluent (1X).
- **Enzyme:** dilute HRP concentrate (250X) 1:250 in ELISA/ELISASPOT Diluent (1X).



**b- Experimental steps:**

- 1- Coat an ELISA plate with the capture antibody in coating buffer (50  $\mu$ L) to each individual well, seal the plate with parafilm and incubate at 4 °C overnight.
- 2- Wash the plate 5 times with ELISA washing buffer and discard remaining solution in the plate. In every washing step, keep the plate for 1 min., and the last step for 2 min. (to remove any residual buffer, blot the plate on adsorption paper)
- 3- Add 100  $\mu$ L of ELISA diluent to each individual well and incubate at rt for 1h.
- 4- Wash the plate following the same procedure as step 2.
- 5- Add all samples in desired concentration (100  $\mu$ L/well) and the last columns were kept for standard. Seal the plates and incubate at 4 °C overnight.
- 6- Follow step 2 for washing.
- 7- Add 50  $\mu$ L/well diluted detection antibody to all wells, then cover the plate and incubate at rt for 1h.
- 8- Follow step 2 for washing.
- 9- Add 50  $\mu$ L/well of diluted Advin-HRP, then seal the plate and incubate for 15 min. at rt.
- 10- Wash the plate for 7 times for 2 min. each.
- 11- Add 50  $\mu$ L/well of substrate solution (offered as mixture of 3,3',5,5'-tetramethylbenzidine (TMB), hydrogen peroxide (H<sub>2</sub>O<sub>2</sub>), and proprietary catalyzing and stabilizing agents) and incubate at rt for 15 min.
- 12- Add 50  $\mu$ L of stop solution.
- 13- Read the plate at 450 nm by TECAN reader.

**Aggregation state test of bikunin and CS-A polysaccharide:**

The hydrodynamic diameters of bikunin and CS-A polysaccharide (1.56 – 50.0  $\mu$ M) in PBS were measured by dynamic light scattering (DLS) analyzer Zetasizer (Malvern).

**Figure S2.** a) Hydrodynamic diameters of bikunin were measured at different concentrations (1.56 – 50.0  $\mu\text{M}$ ) in PBS. For each concentration, three independent batches of samples were measured. Changes of hydrodynamic diameters of b) bikunin based on data in a). c) Changes of hydrodynamic diameters of CS-A polysaccharide. CS and bikunin showed similar small size decreases at higher concentrations supporting that CS and bikunin are soluble and not aggregated at concentrations studied.

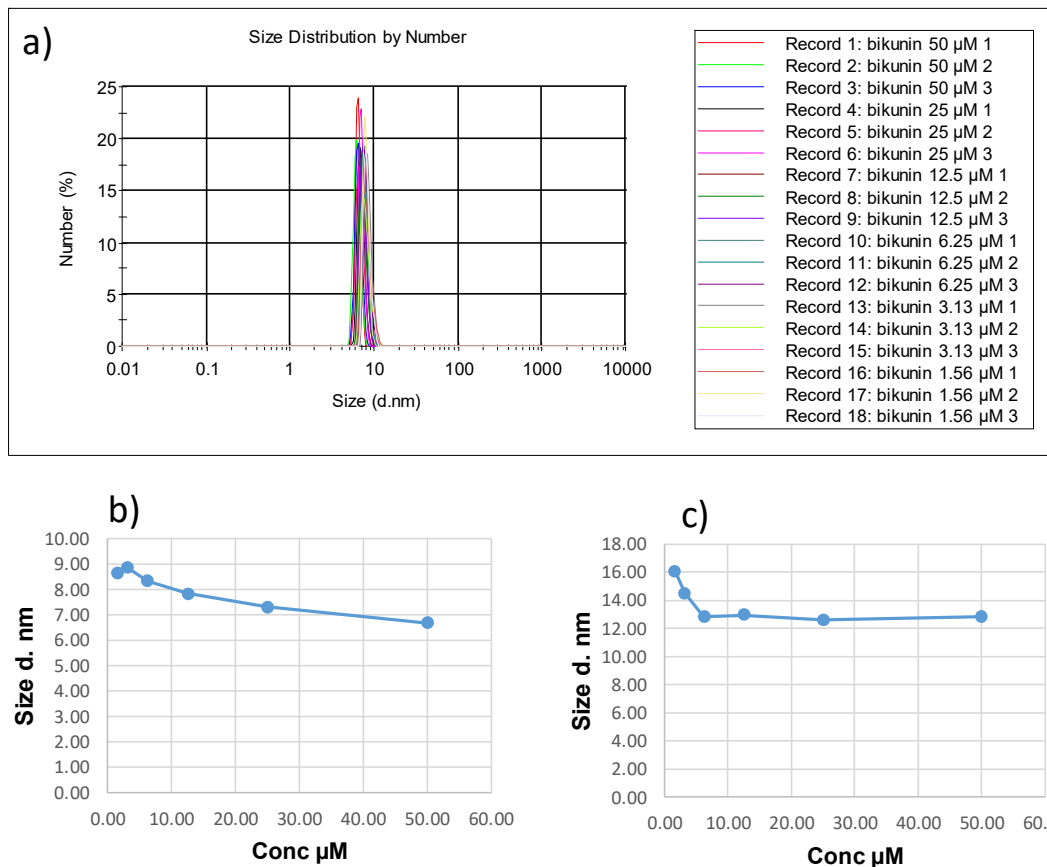

## References:

1. Doneanu, C. E.; Chen, W.; Gebler, J. C. **Analysis of oligosaccharides derived from heparin by ion-pair reversed-phase chromatography/mass spectrometry.** *Anal. Chem.* **2009**, *81*, 3485-99.
2. Bock, K.; Pedersen, C. **A study of  $^{13}\text{C}$  coupling constants in hexopyranoses.** *J. Chem. Soc., Perkin Trans. 2*, **1974**, 293-297.
3. Maza, S.; Mar Kayser, M.; Macchione, G.; López-Prados, J.; Angulo, J.; de Paz, J. L.; Nieto, P. M. **Synthesis of chondroitin/dermatan sulfate-like oligosaccharides and evaluation of their protein affinity by fluorescence polarization.** *Org. Biomol. Chem.* **2013**, *11*, 3510-3525.
4. Ramadan, S.; Yang, W.; Zhang, Z.; Huang, X. **Synthesis of chondroitin sulfate A bearing syndecan-1 glycopeptide.** *Org. Lett.* **2017**, *19*, 4838-4841.
5. Ali, A. M.; Taylor, S. D. **Efficient Solid-Phase Synthesis of Sulfotyrosine Peptides using a Sulfate Protecting-Group Strategy.** *Angew. Chem. Int. Ed.* **2009**, *48*, 2024-2026.

## NMR Spectra

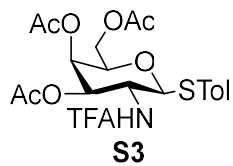

<sup>1</sup>H-NMR (CDCl<sub>3</sub>, 500 MHz) of S3

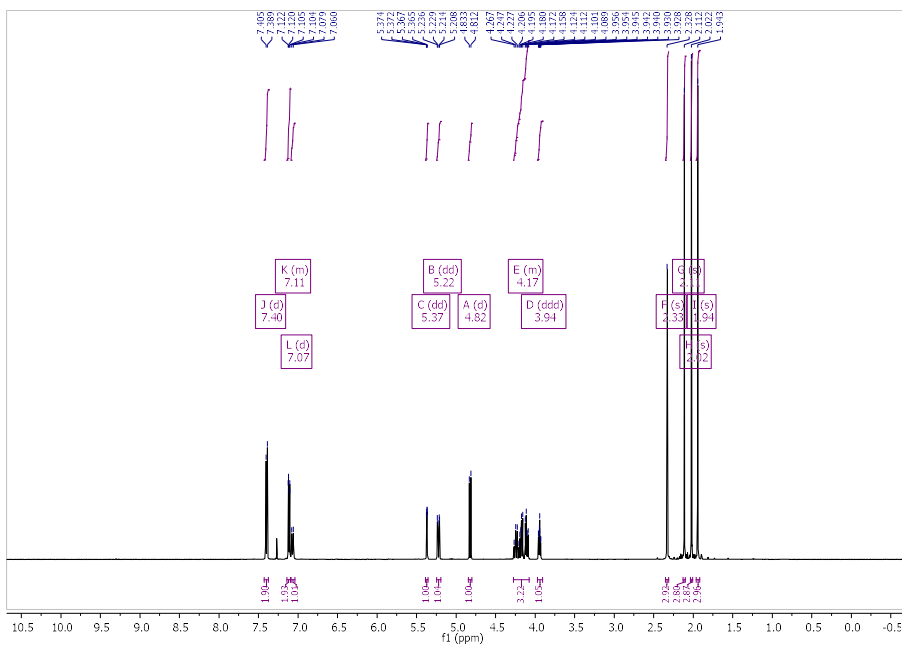

<sup>13</sup>C-NMR (CDCl<sub>3</sub>, 126 MHz) of S3

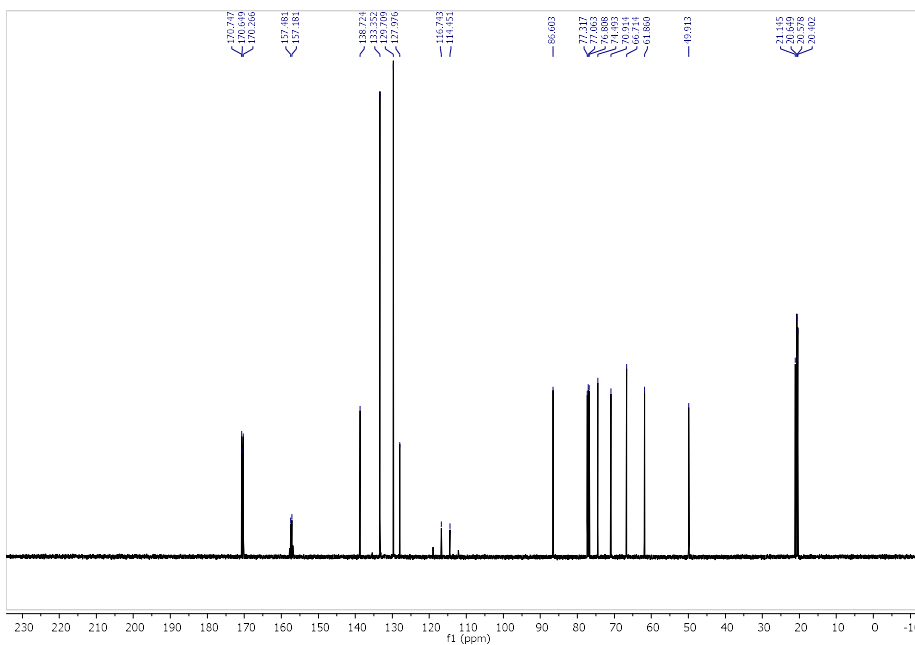

gCOSY (CDCl<sub>3</sub>, 500 MHz) of S3

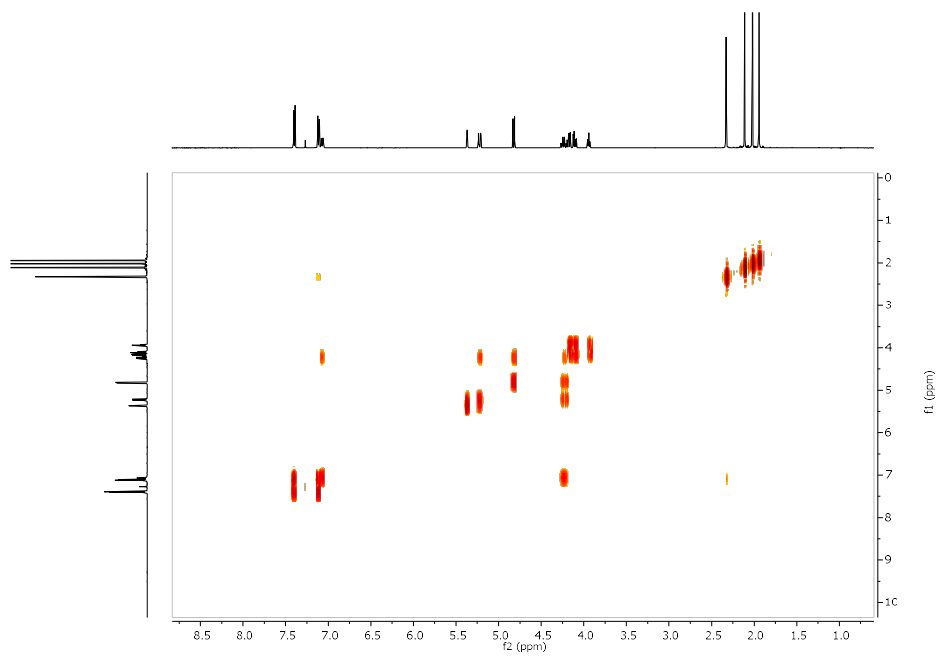

gHSQC (CDCl<sub>3</sub>, 500 MHz) of S3

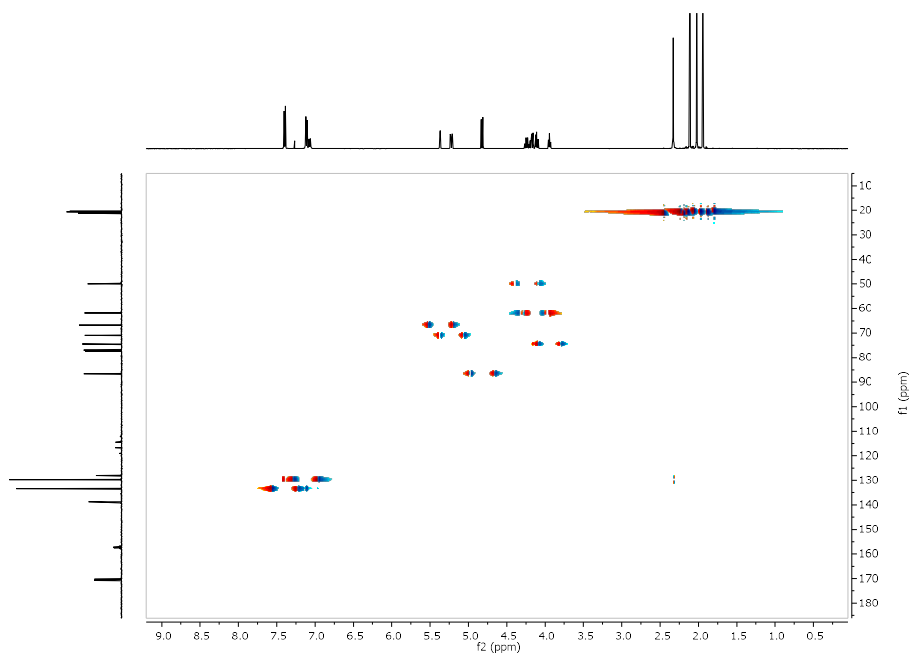



gCOSY (CDCl<sub>3</sub>, 500 MHz) of **6**

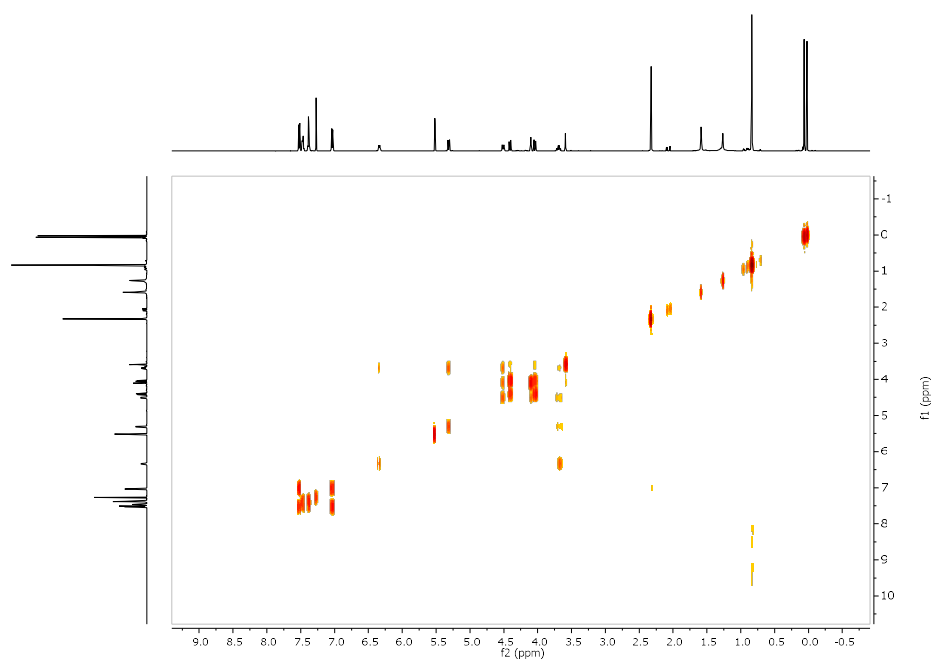

gHSQC (CDCl<sub>3</sub>, 500 MHz) of **6**

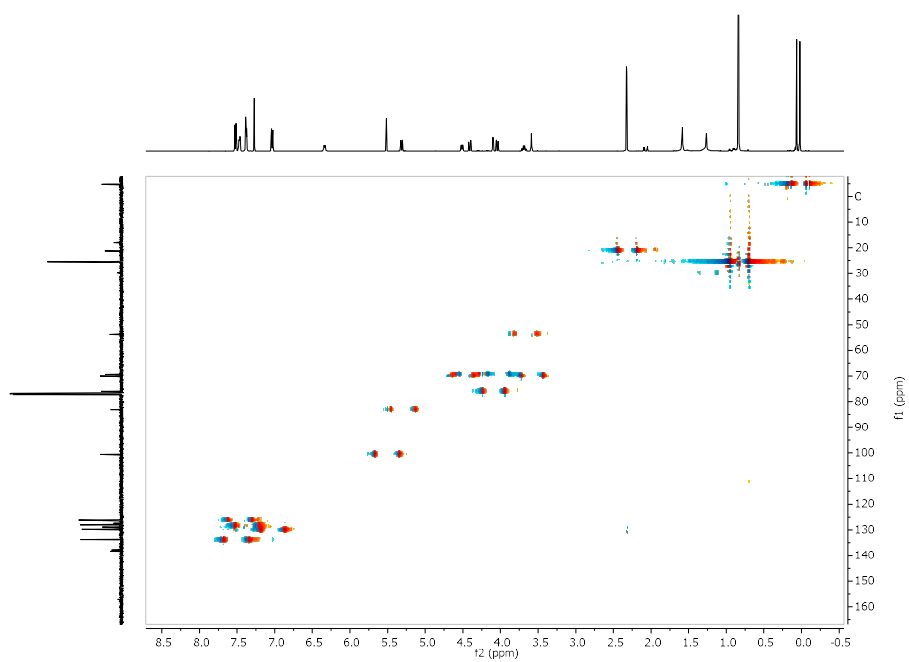

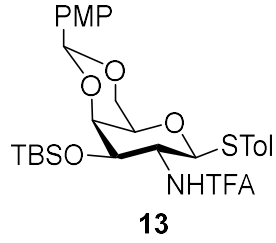

<sup>1</sup>H-NMR (CDCl<sub>3</sub>, 500 MHz) of **13**

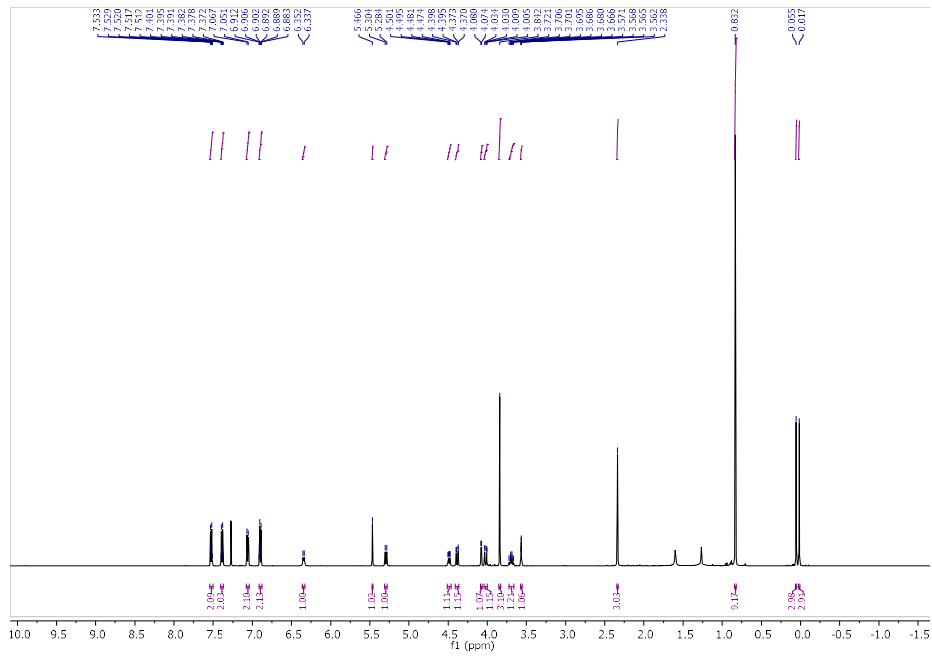

<sup>13</sup>C-NMR (CDCl<sub>3</sub>, 126 MHz) of **13**

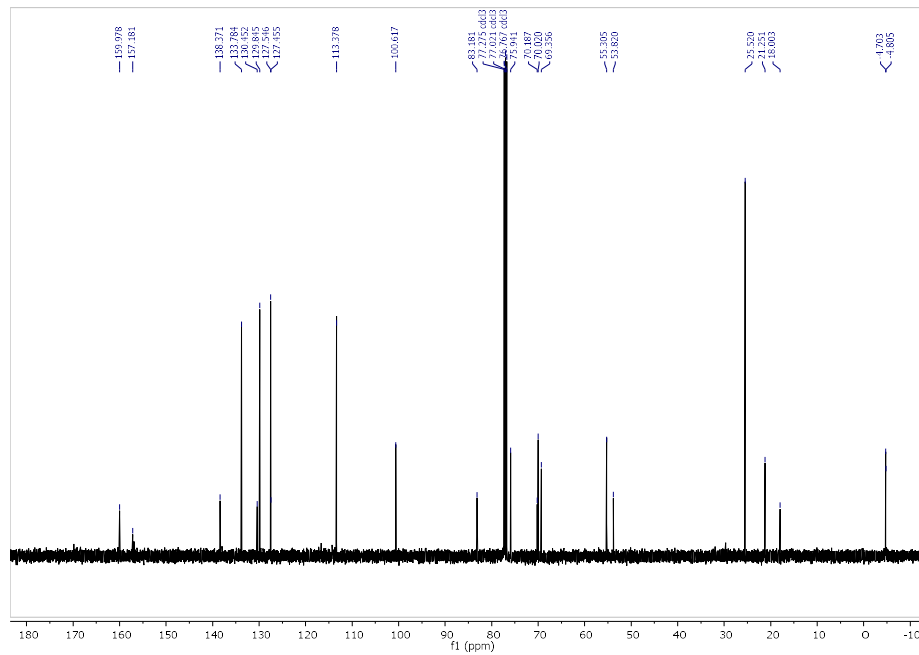

gCOSY (CDCl<sub>3</sub>, 500 MHz) of **13**

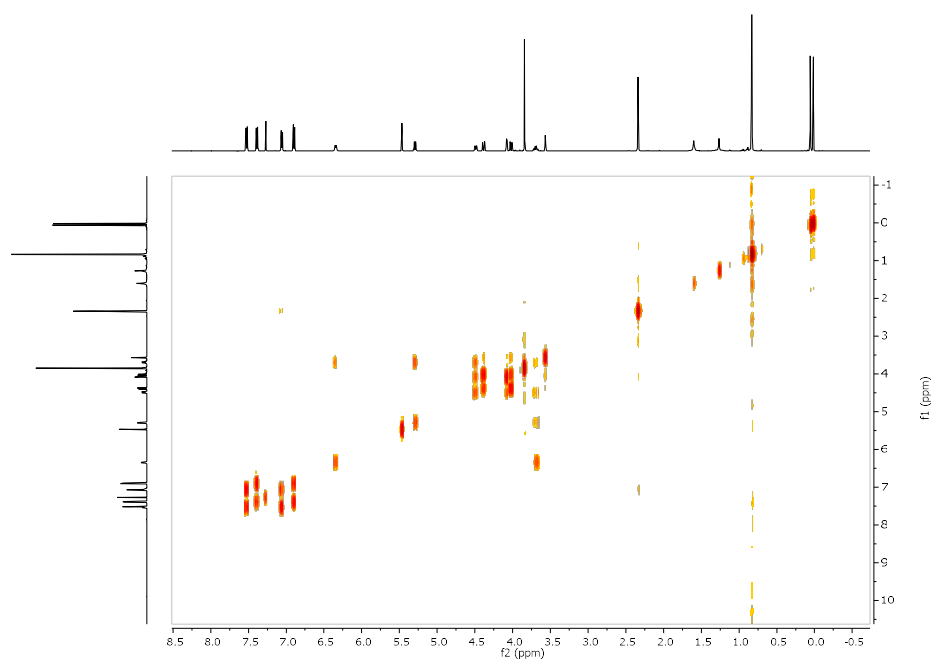

gHSQC (CDCl<sub>3</sub>, 500 MHz) of **13**

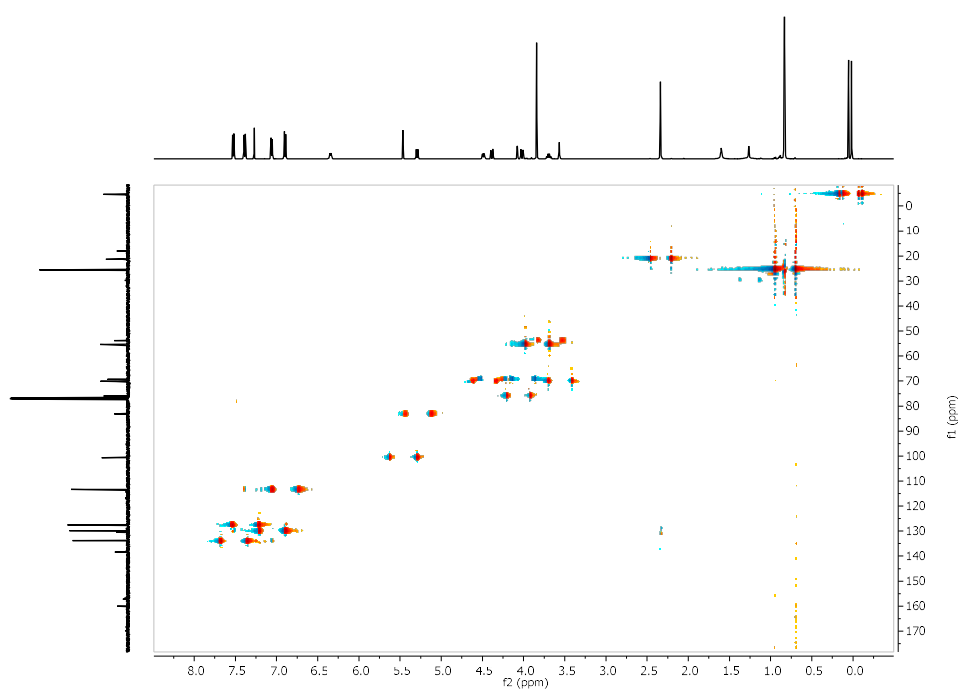





gCOSY (CDCl<sub>3</sub>, 500 MHz) of S7

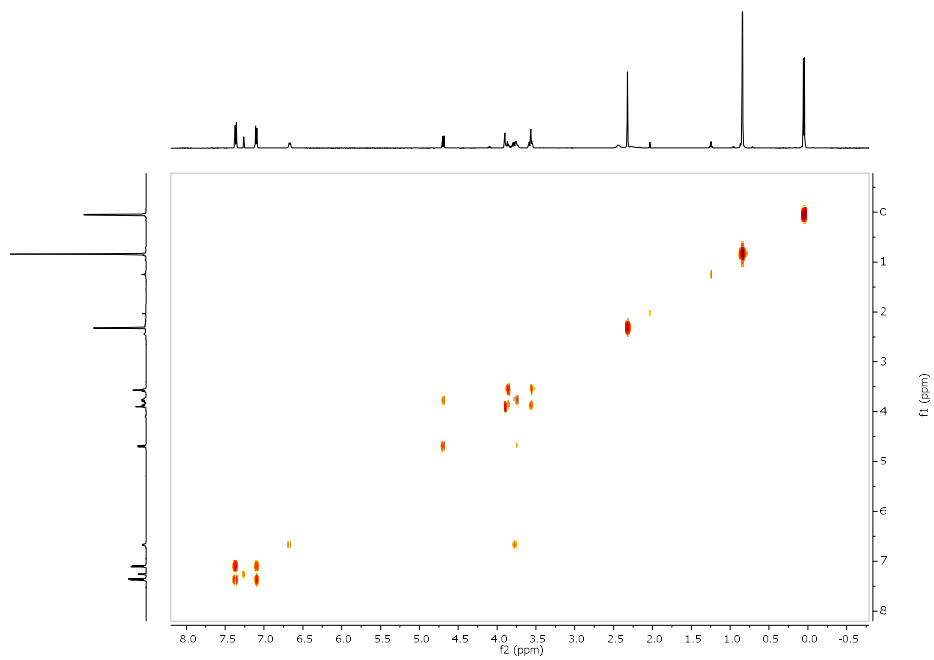

gHSQC (CDCl<sub>3</sub>, 500 MHz) of S7

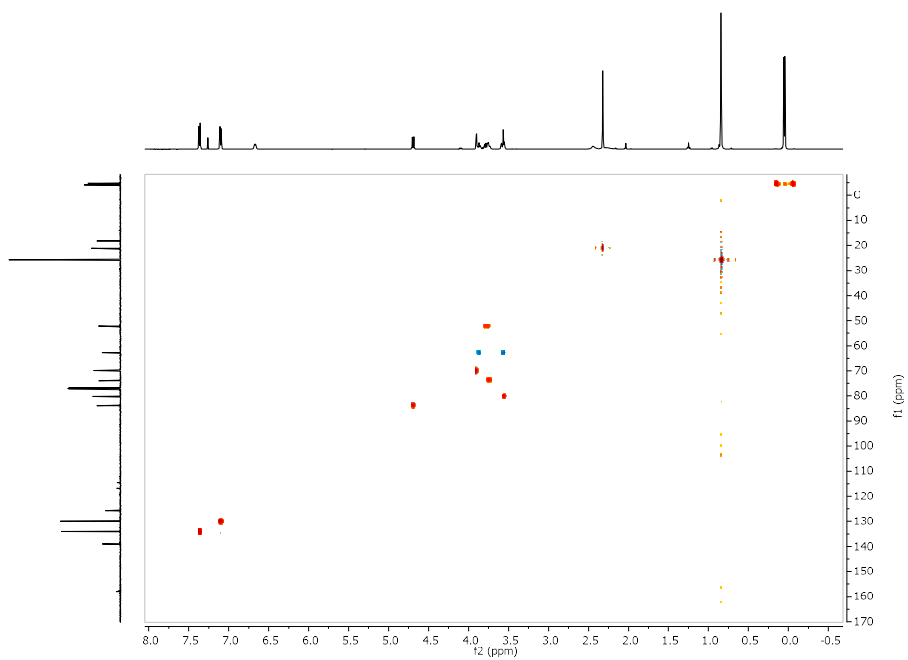

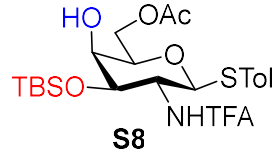

<sup>1</sup>H-NMR (CDCl<sub>3</sub>, 500 MHz) of S8

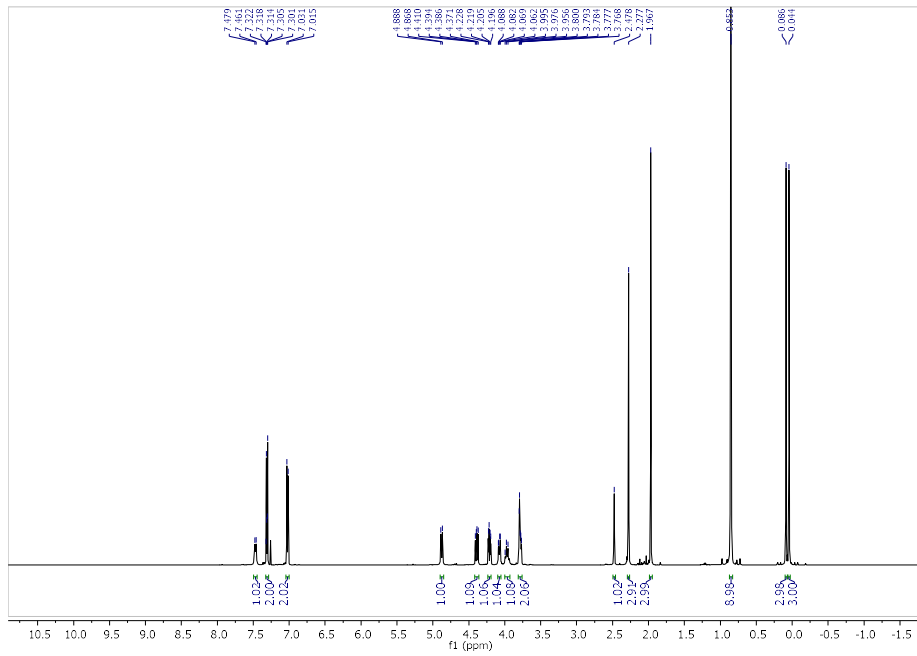

<sup>13</sup>C-NMR (CDCl<sub>3</sub>, 126 MHz) of S8

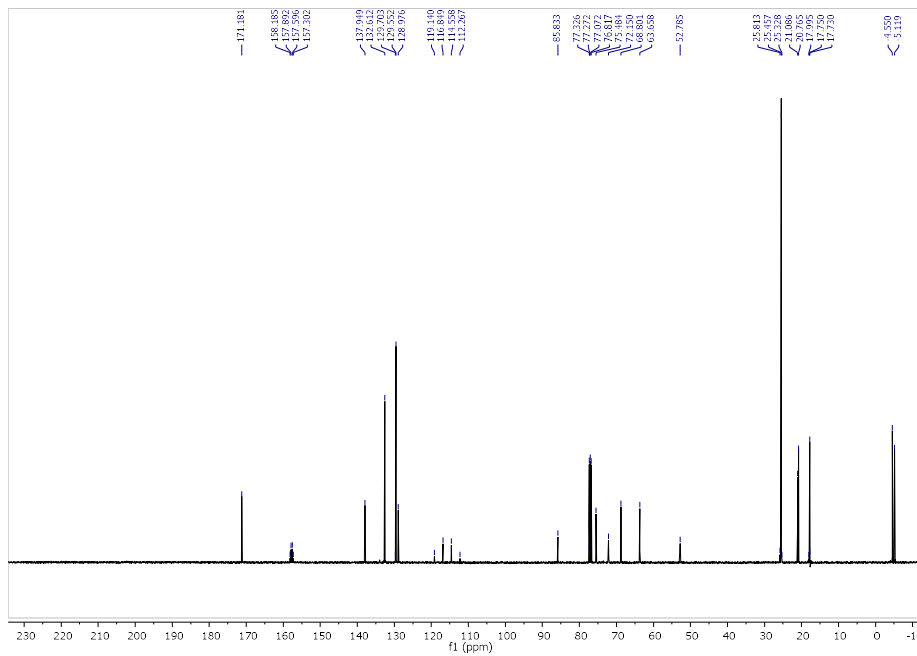

gCOSY (CDCl<sub>3</sub>, 500 MHz) of S8

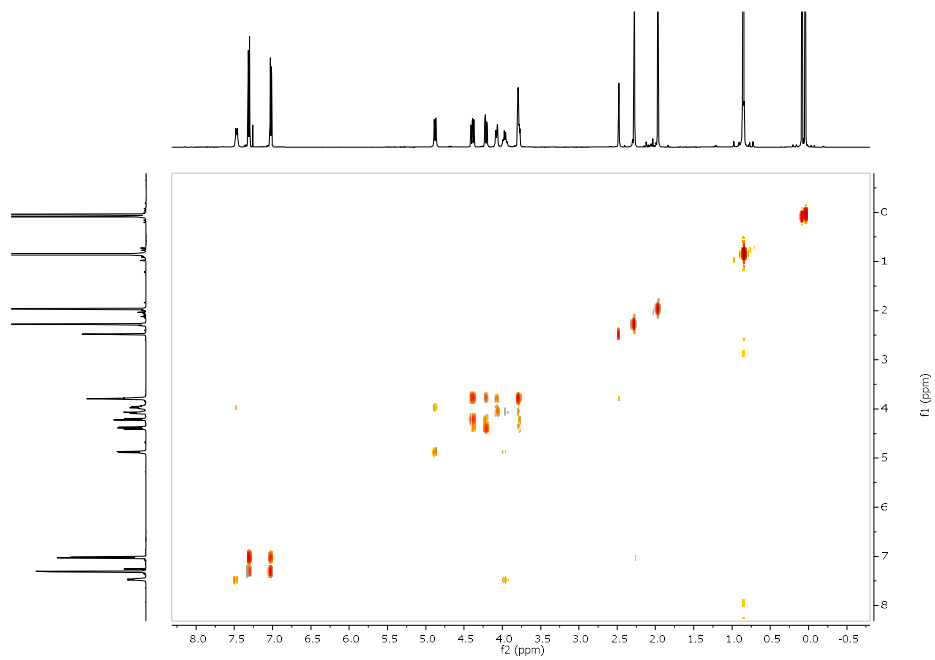

gHSQC (CDCl<sub>3</sub>, 500 MHz) of S8

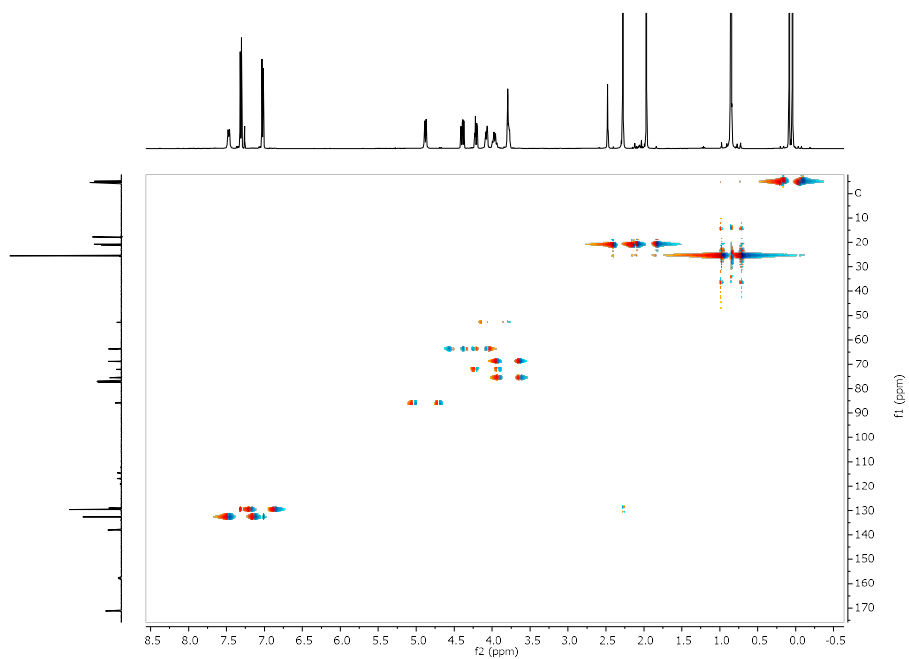

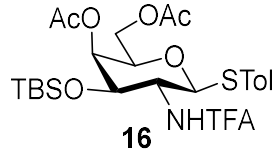

<sup>1</sup>H-NMR (CDCl<sub>3</sub>, 500 MHz) of **16**

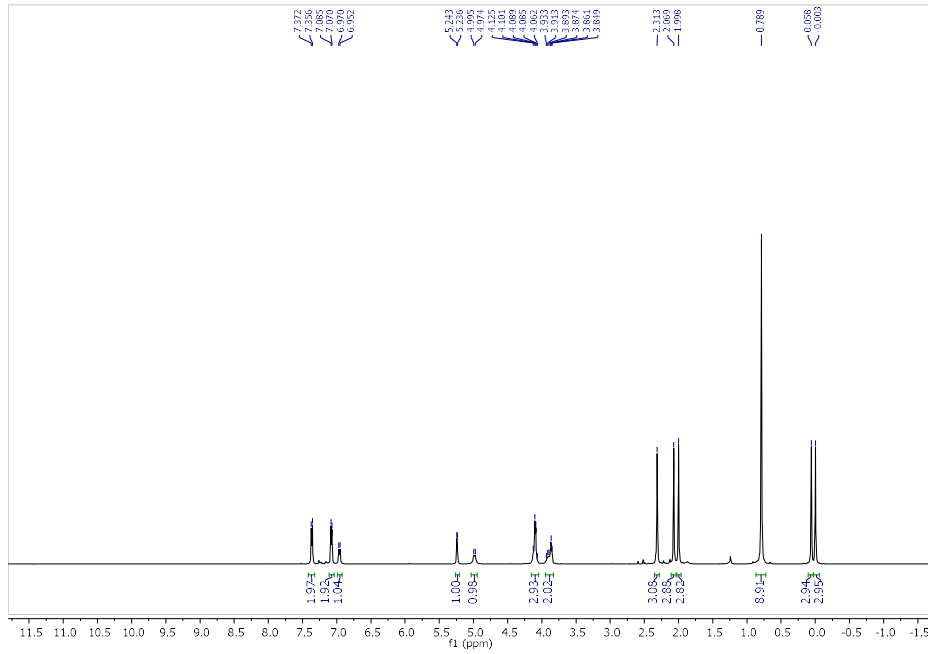

<sup>13</sup>C-NMR (CDCl<sub>3</sub>, 126 MHz) of **16**

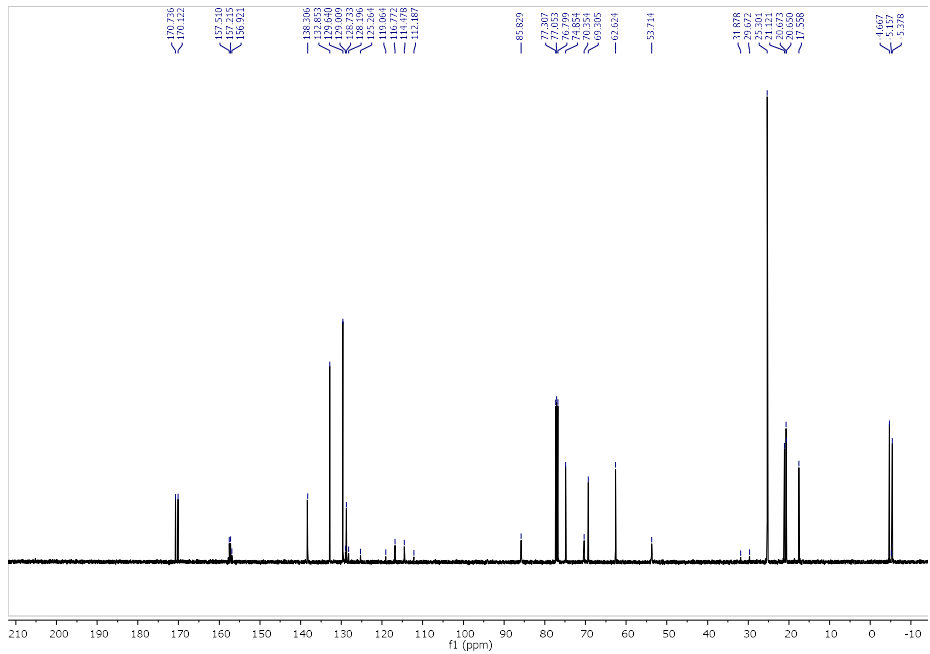

gCOSY (CDCl<sub>3</sub>, 500 MHz) of **16**

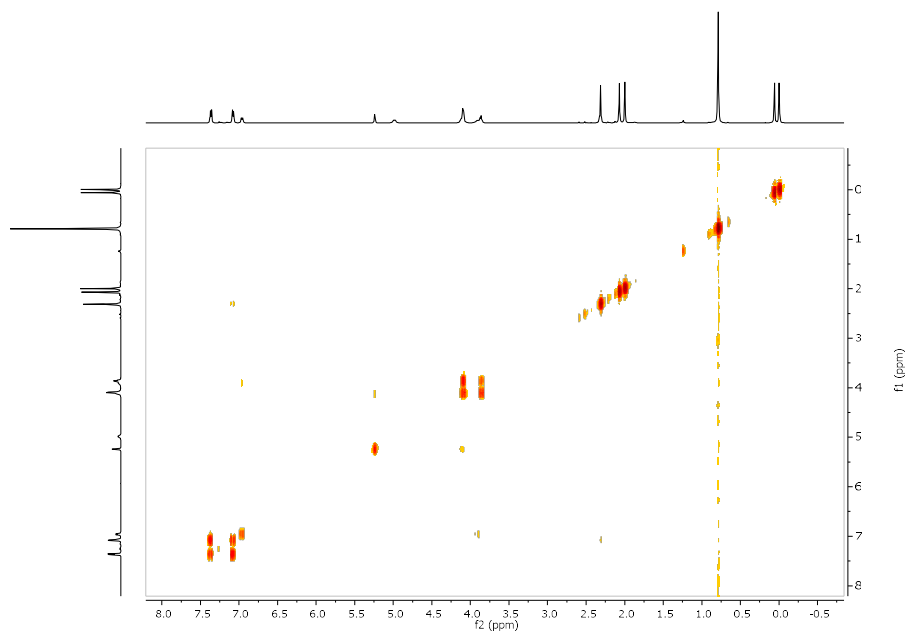

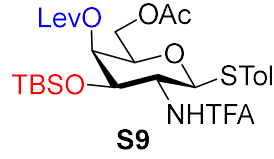

<sup>1</sup>H-NMR (CDCl<sub>3</sub>, 500 MHz) of S9

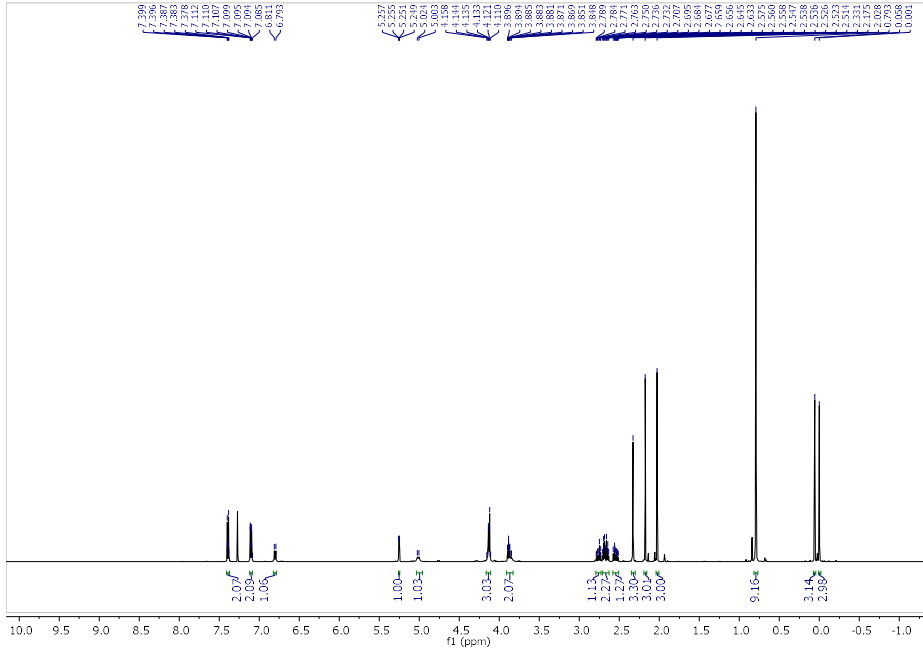

<sup>13</sup>C-NMR (CDCl<sub>3</sub>, 126 MHz) of S9

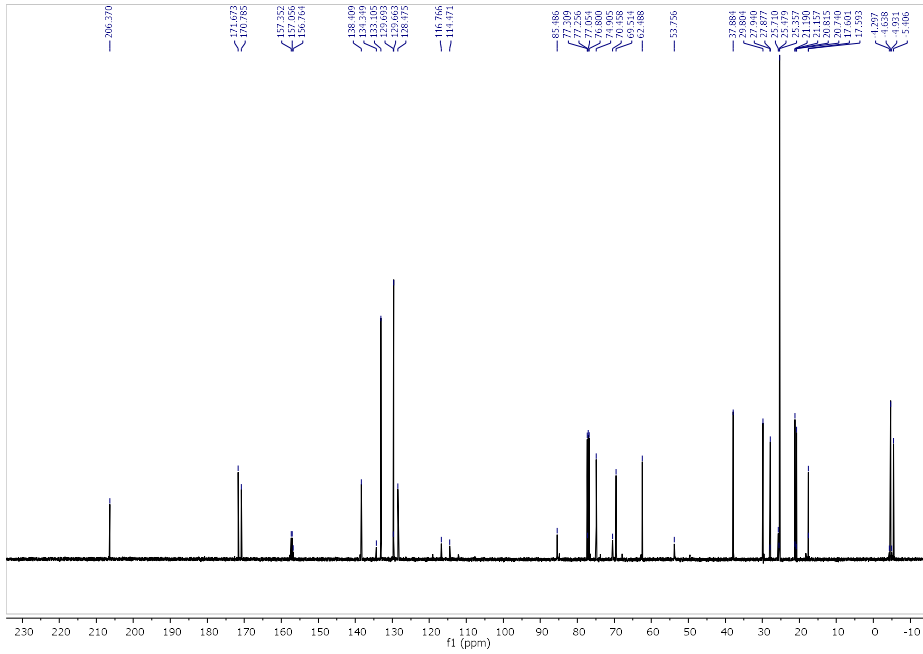

gCOSY (CDCl<sub>3</sub>, 500 MHz) of S9

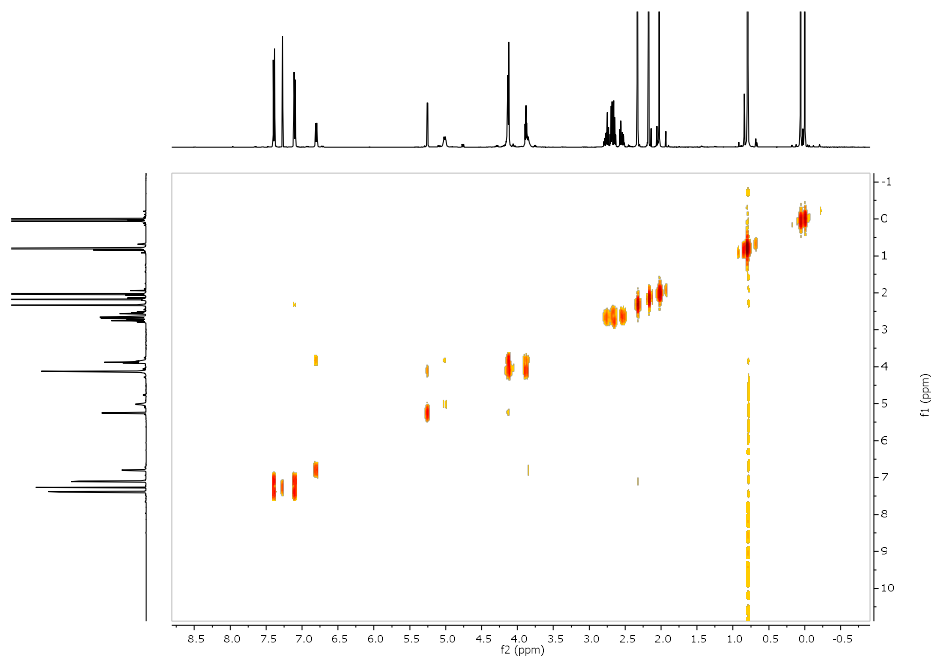

gHSQC (CDCl<sub>3</sub>, 500 MHz) of S9

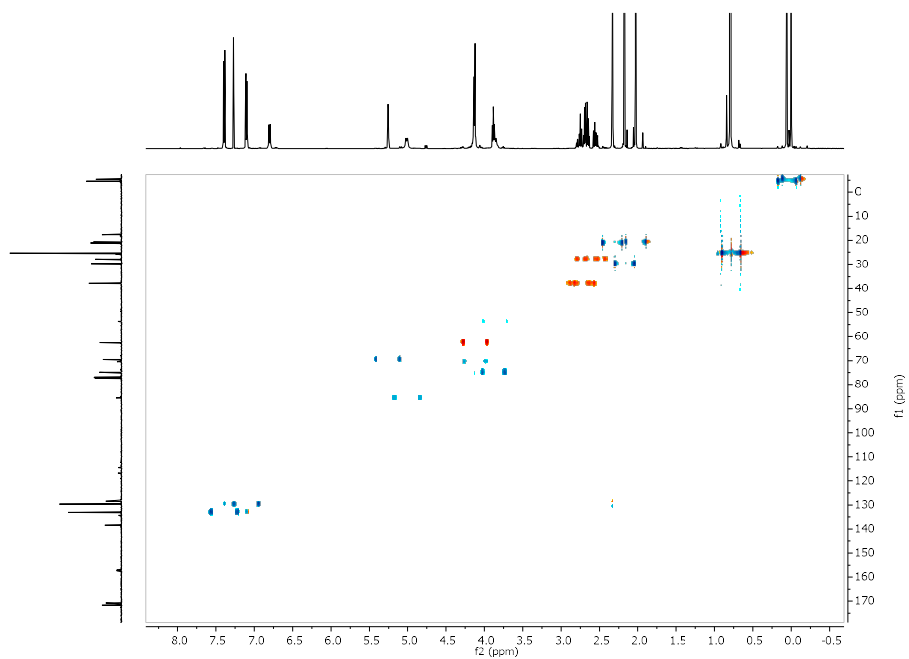





gCOSY (CDCl<sub>3</sub>, 500 MHz) of **10**

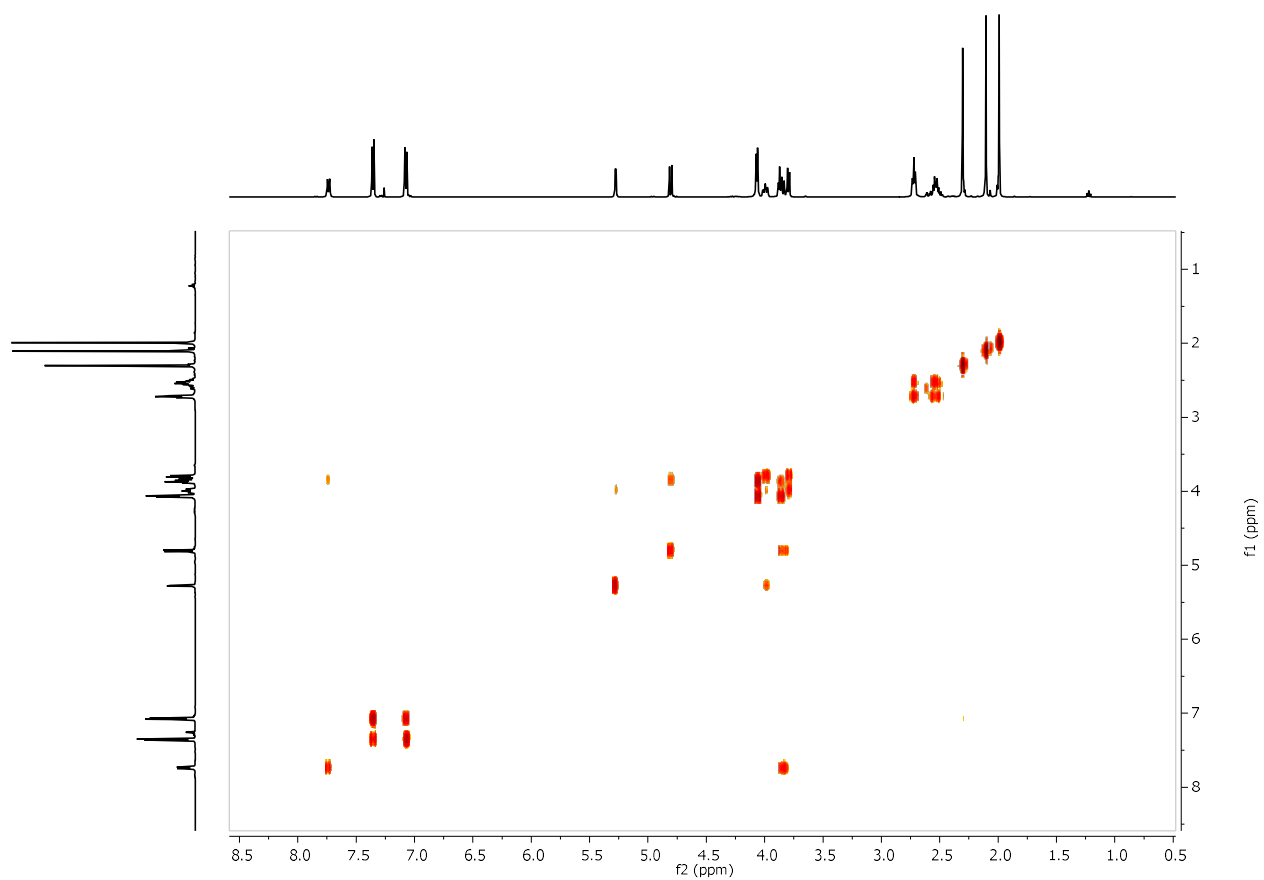



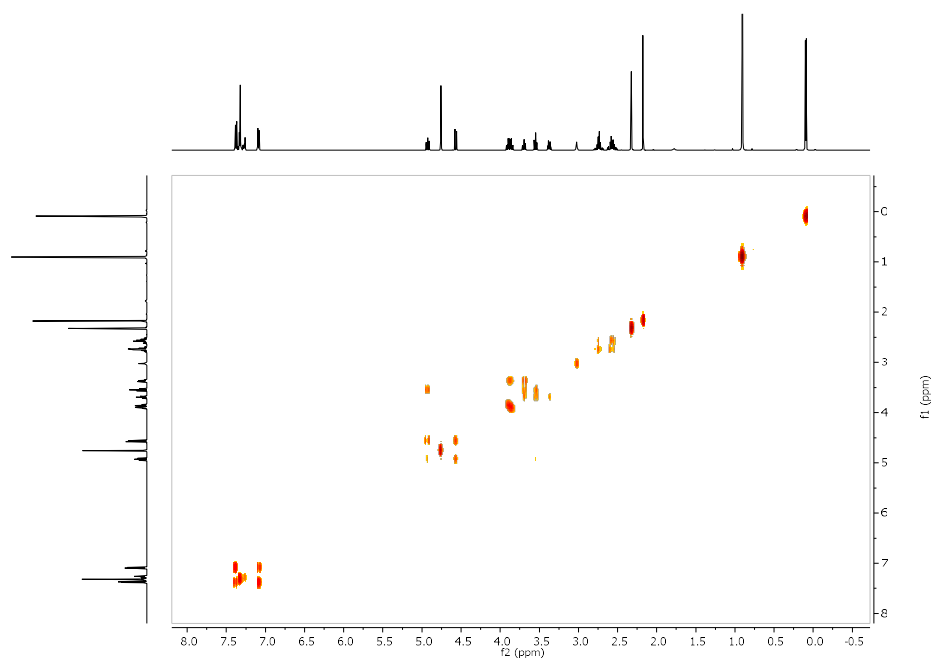

gHSQC (CDCl<sub>3</sub>, 500 MHz) of **7**

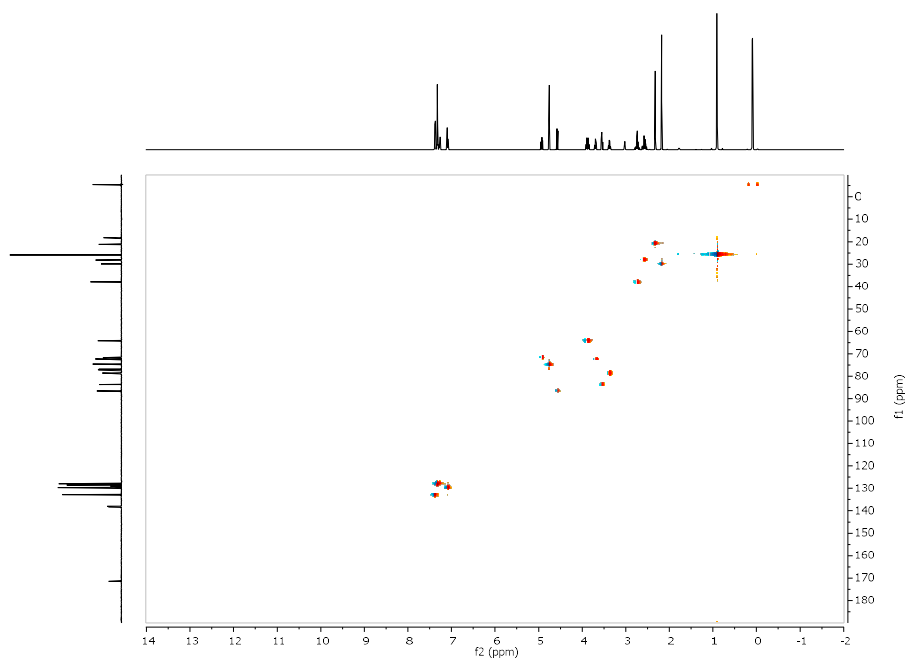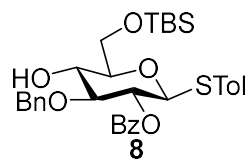

<sup>1</sup>H-NMR (CDCl<sub>3</sub>, 500 MHz) of **8**

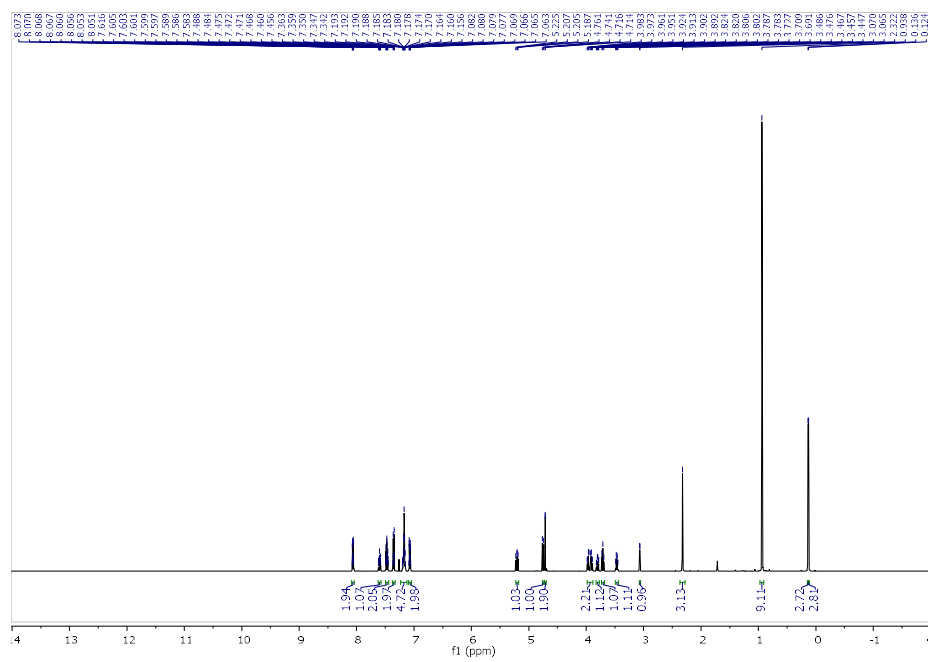

<sup>13</sup>C-NMR (CDCl<sub>3</sub>, 126 MHz) of **4**

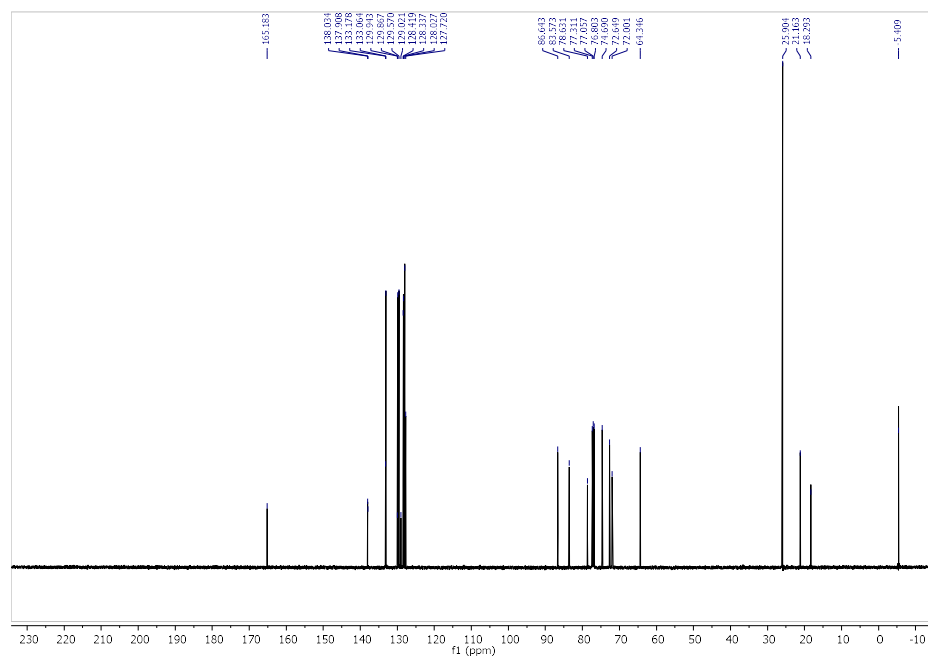

gCOSY (CDCl<sub>3</sub>, 500 MHz) of **8**

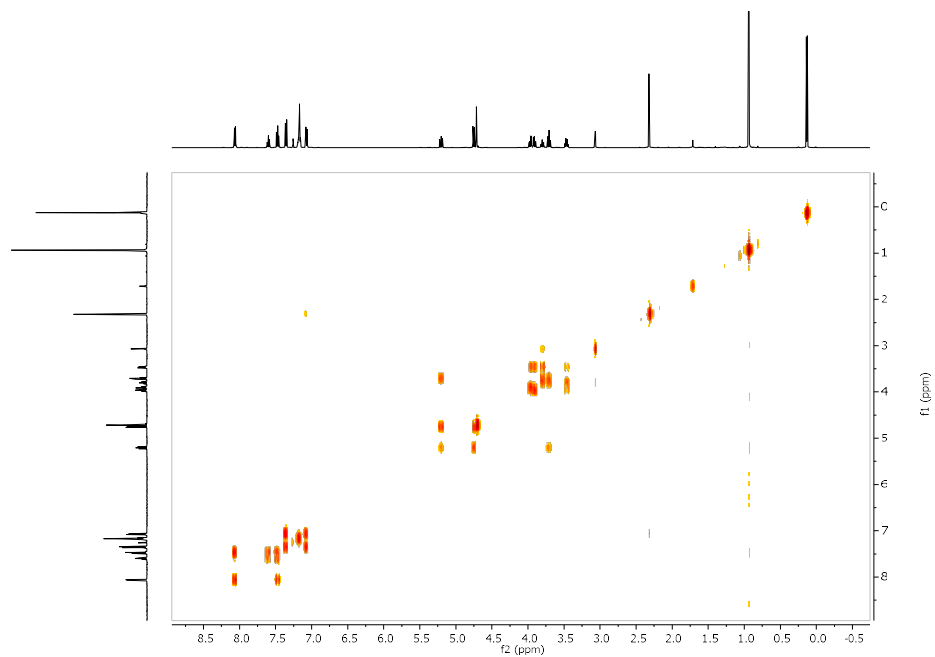

gHSQC (CDCl<sub>3</sub>, 500 MHz) of **8**

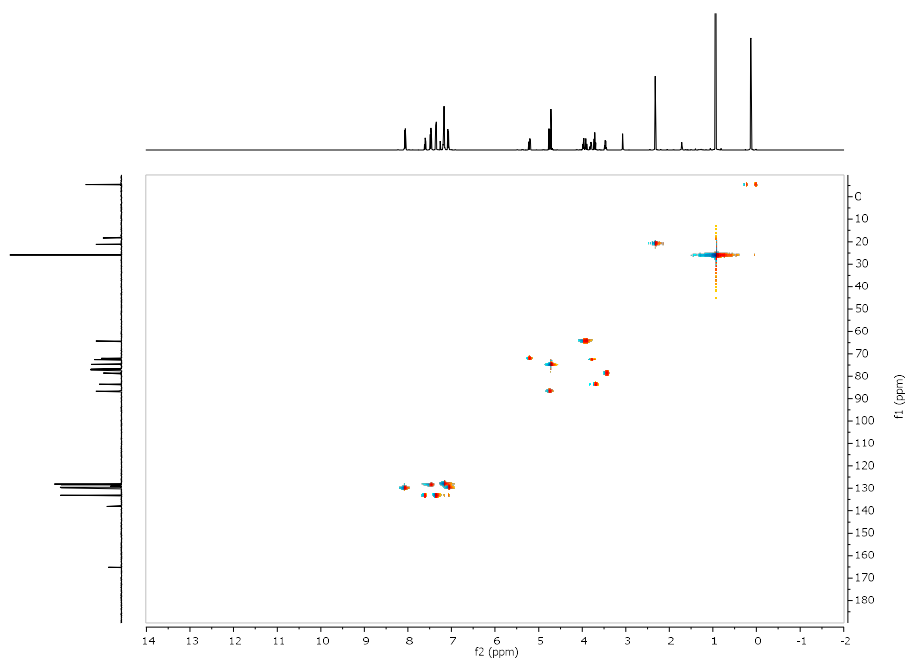



gCOSY (CDCl<sub>3</sub>, 500 MHz) of S14

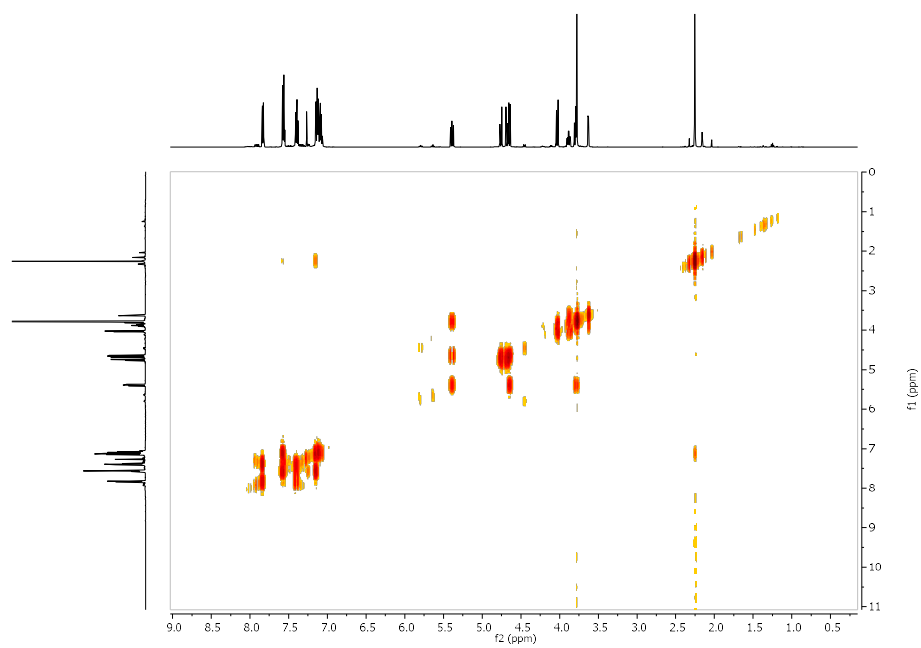

gHSQC (CDCl<sub>3</sub>, 500 MHz) of S14

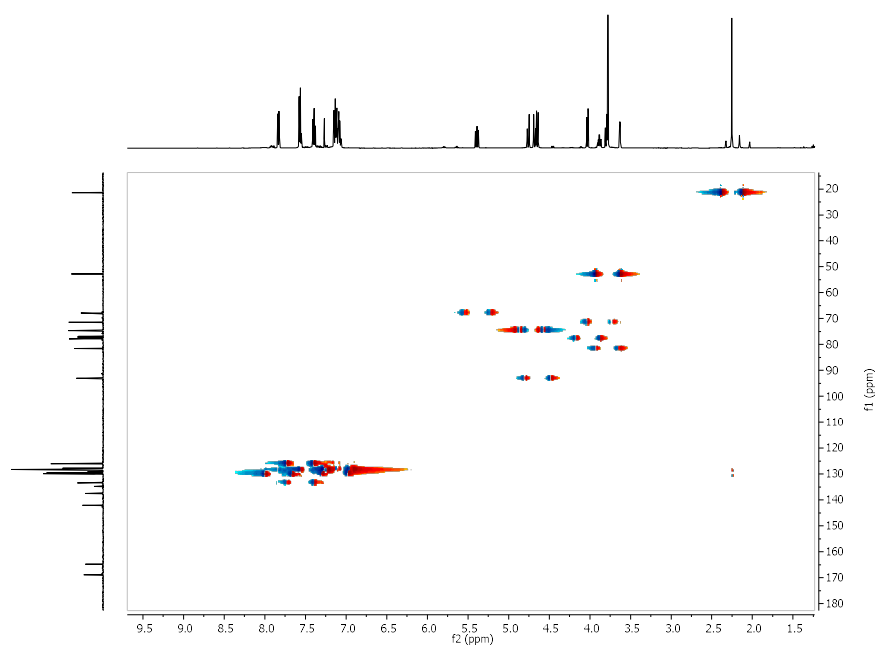



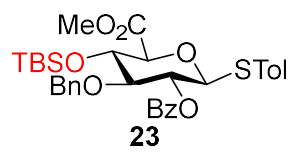

gHSQC (CDCl<sub>3</sub>, 500 MHz) of **23**

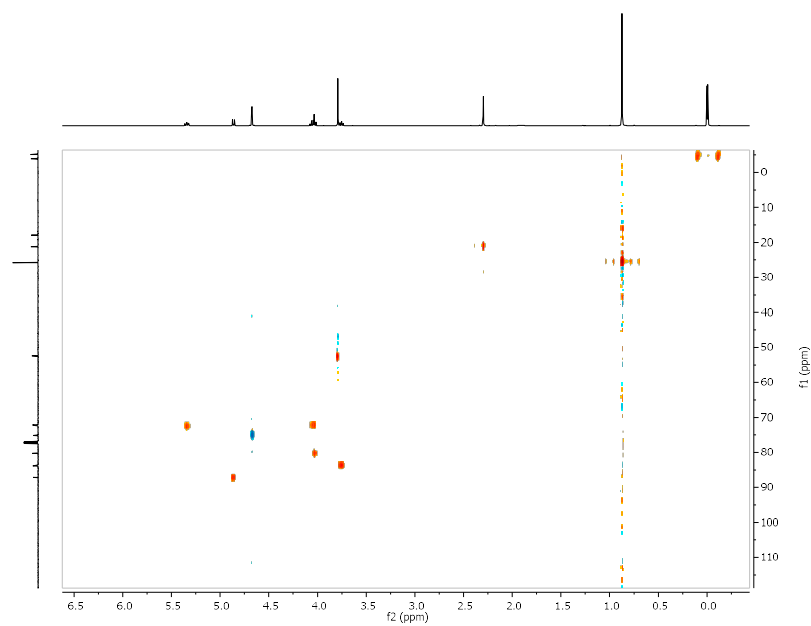

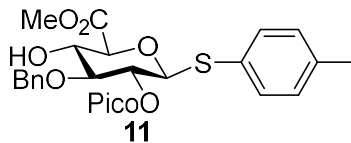

<sup>1</sup>H-NMR (CDCl<sub>3</sub>, 500 MHz) of **11**

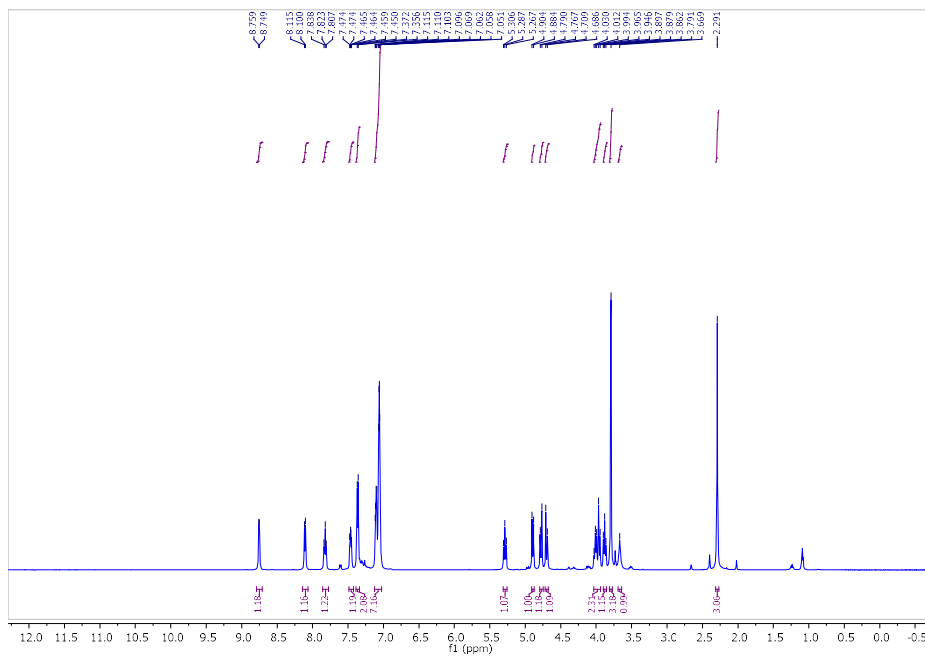

<sup>13</sup>C-NMR (CDCl<sub>3</sub>, 126 MHz) of **11**

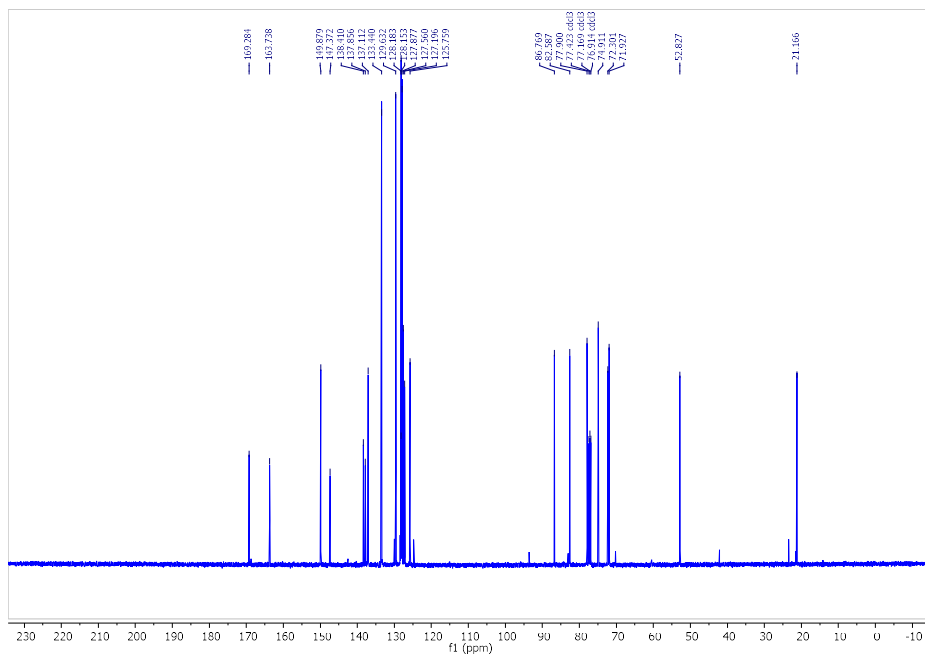

gCOSY (CDCl<sub>3</sub>, 500 MHz) of **11**

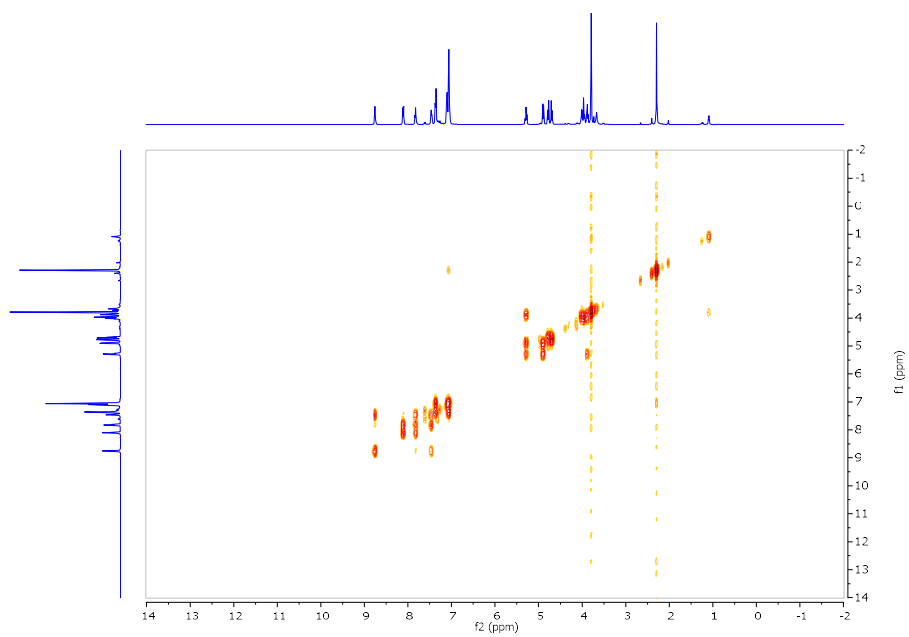

gHSQC (CDCl<sub>3</sub>, 500 MHz) of **11**

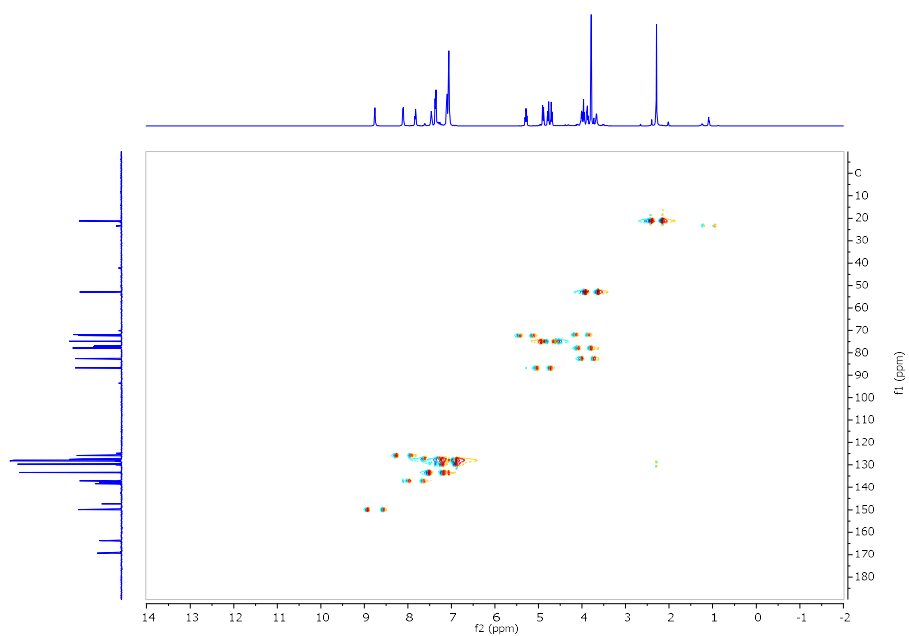

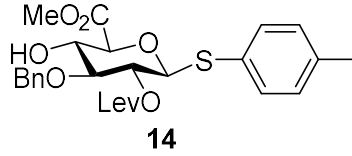

<sup>1</sup>H-NMR (CDCl<sub>3</sub>, 500 MHz) of **14**

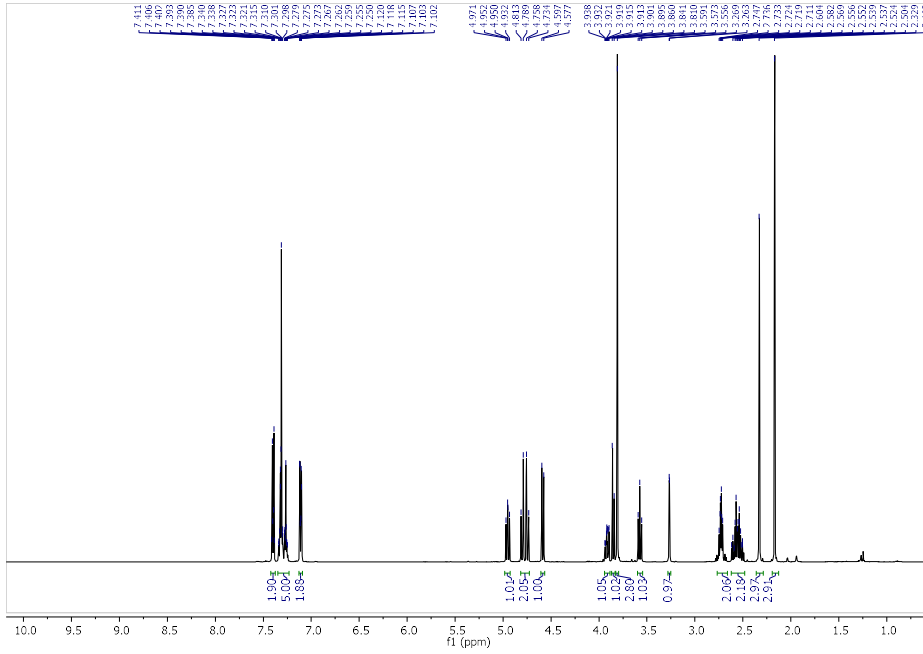

<sup>13</sup>C-NMR (CDCl<sub>3</sub>, 126 MHz) of **14**

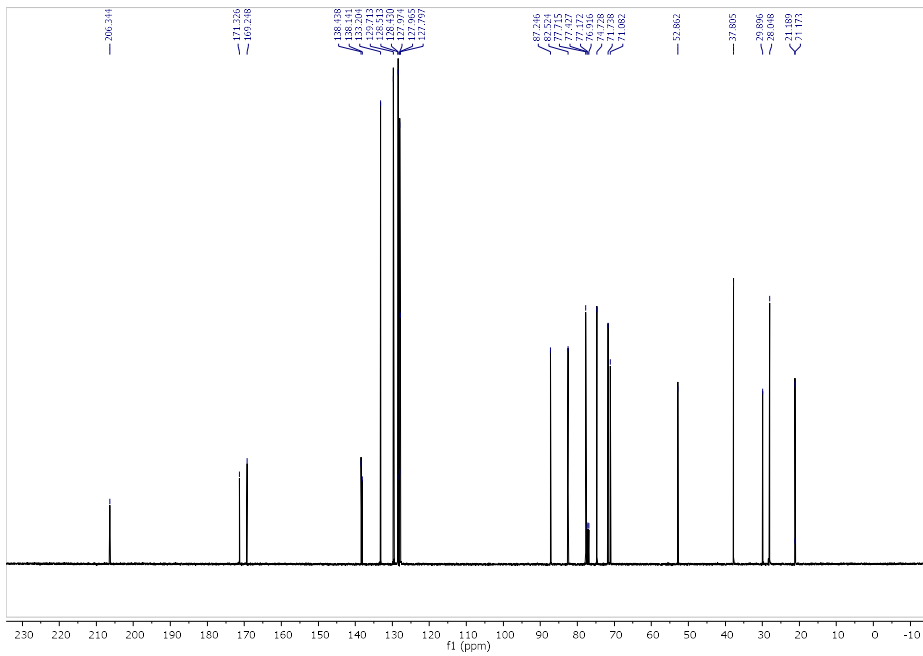

gCOSY (CDCl<sub>3</sub>, 500 MHz) of **14**

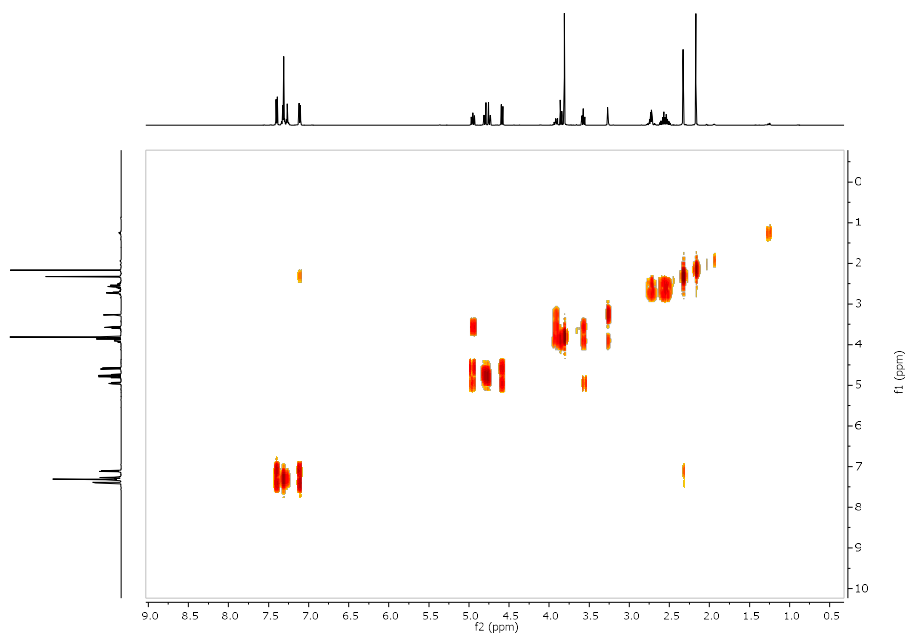



gCOSY (CDCl<sub>3</sub>, 500 MHz) of S22

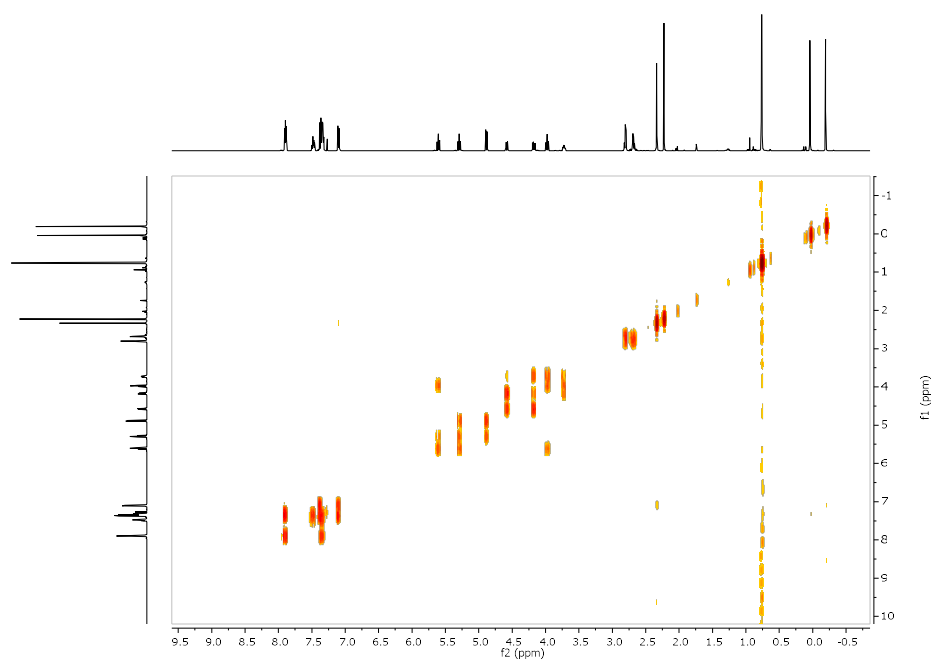

gHSQC (CDCl<sub>3</sub>, 500 MHz) of S22

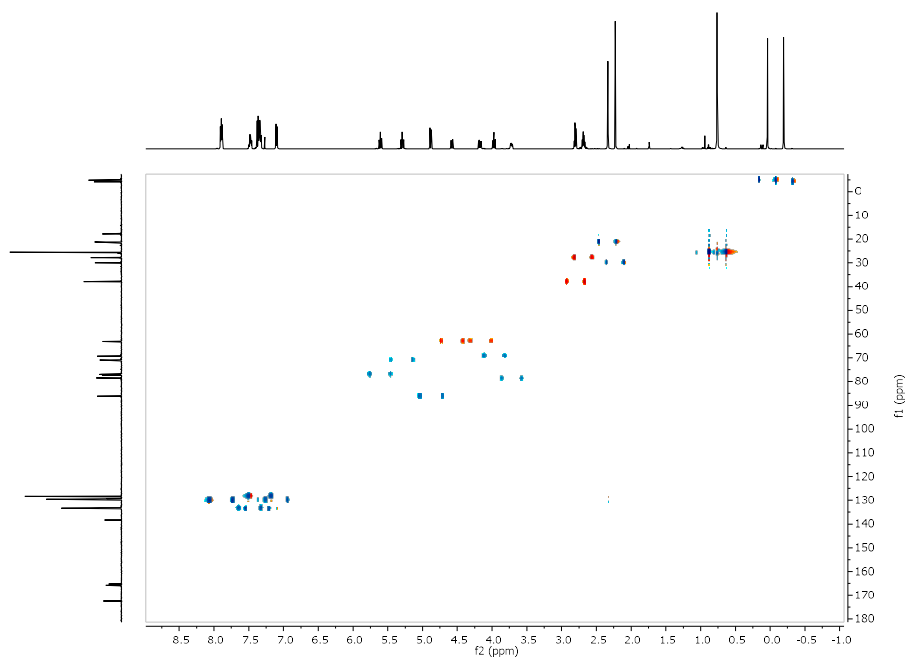

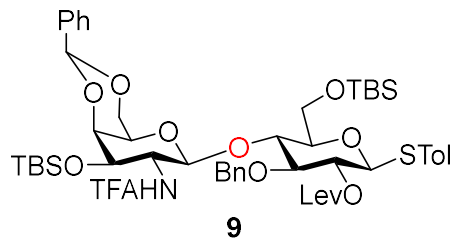

<sup>1</sup>H-NMR (CDCl<sub>3</sub>, 500 MHz) of **9**

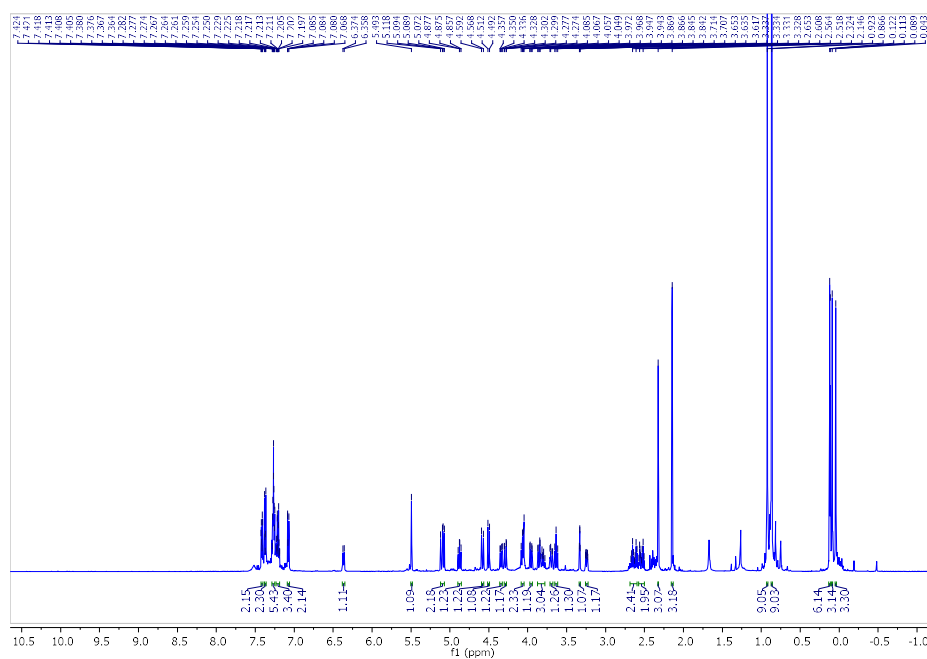

<sup>13</sup>C-NMR (CDCl<sub>3</sub>, 126 MHz) of **9**

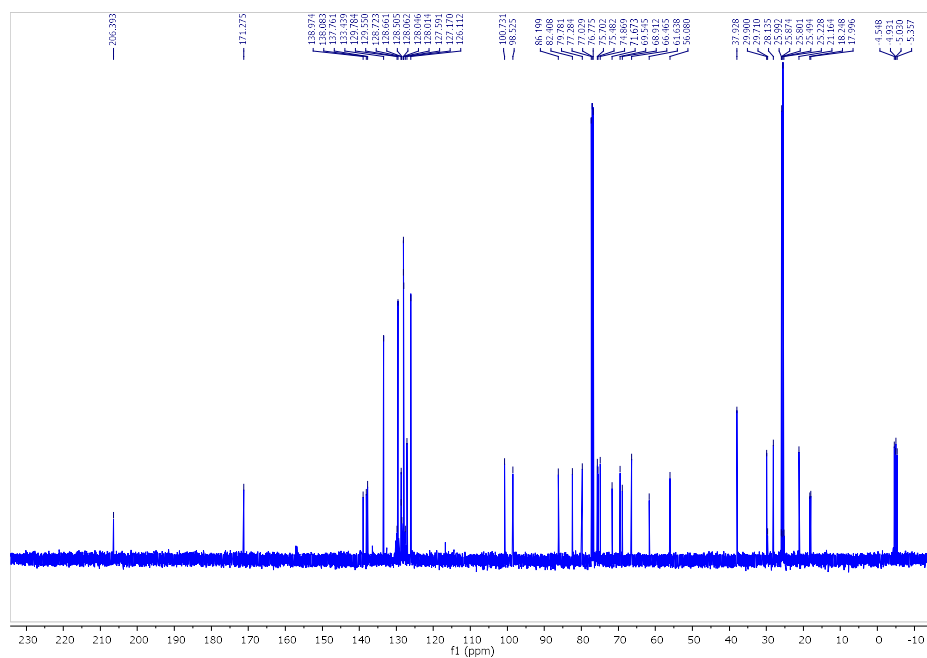



gCOSY (CDCl<sub>3</sub>, 500 MHz) of **9**

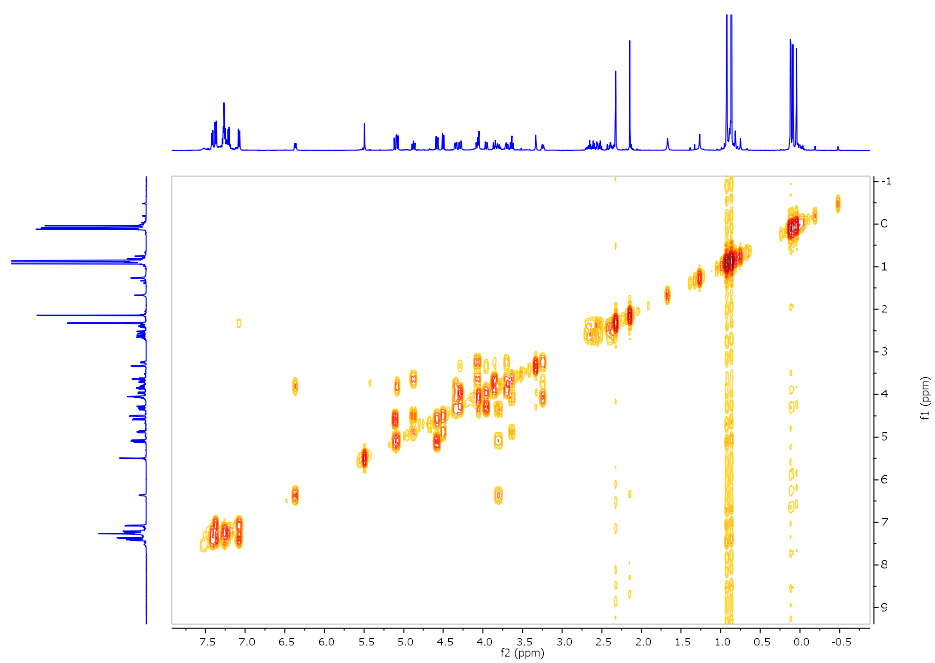

gHSQC (CDCl<sub>3</sub>, 500 MHz) of **9**

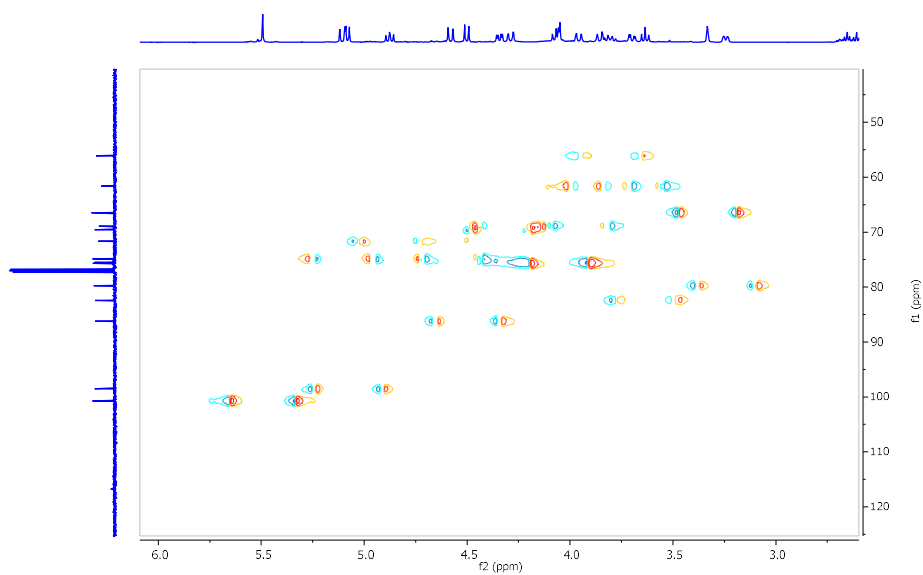

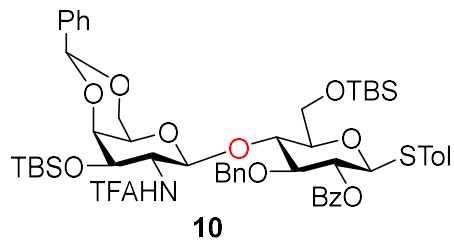

<sup>1</sup>H-NMR (CDCl<sub>3</sub>, 500 MHz) of **10**

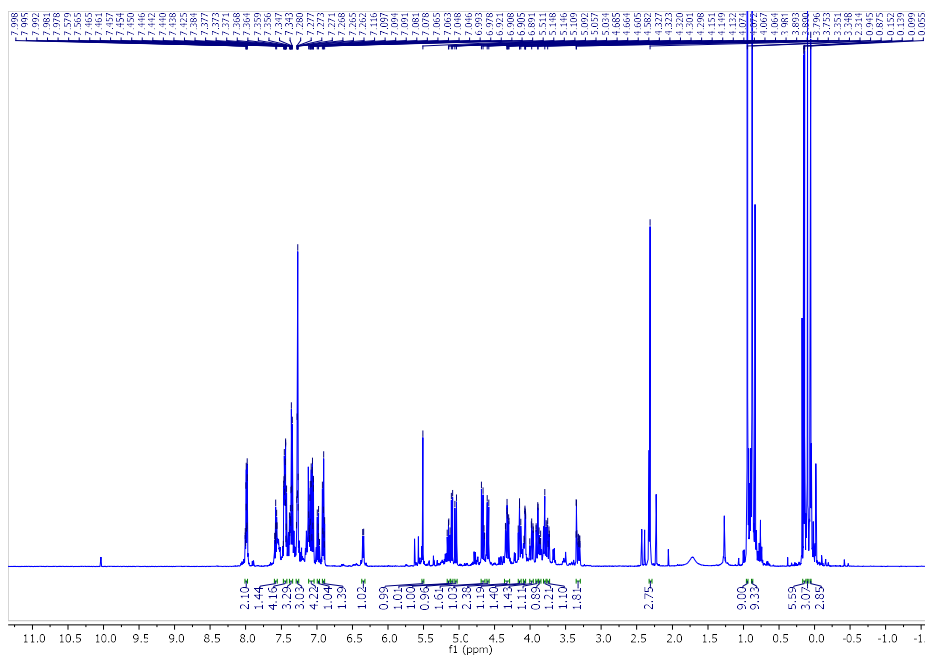

<sup>13</sup>C-NMR (CDCl<sub>3</sub>, 126 MHz) of **10**

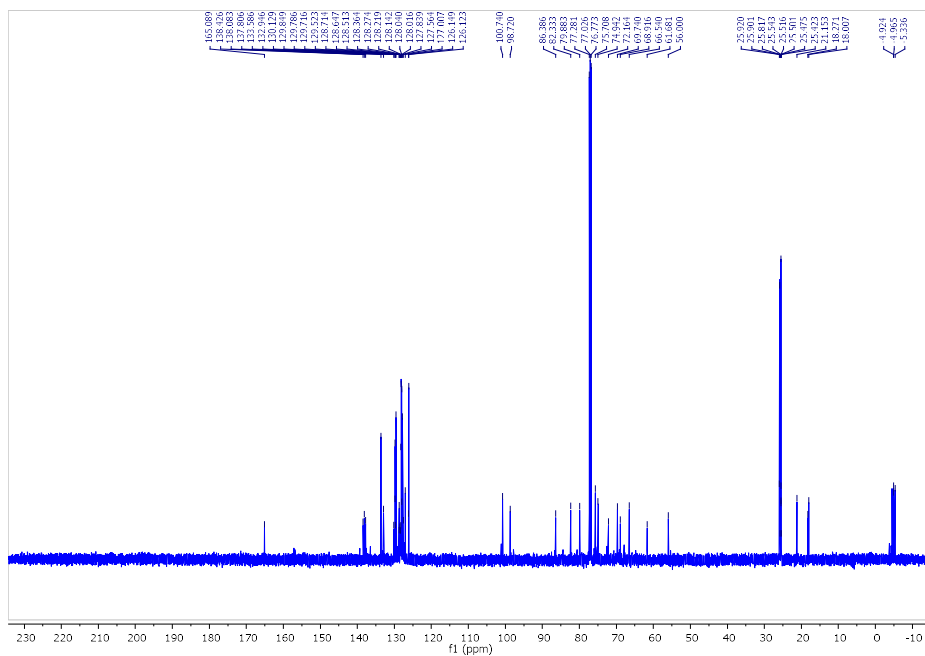

gHSQC (CDCl<sub>3</sub>, 500 MHz) of **10**

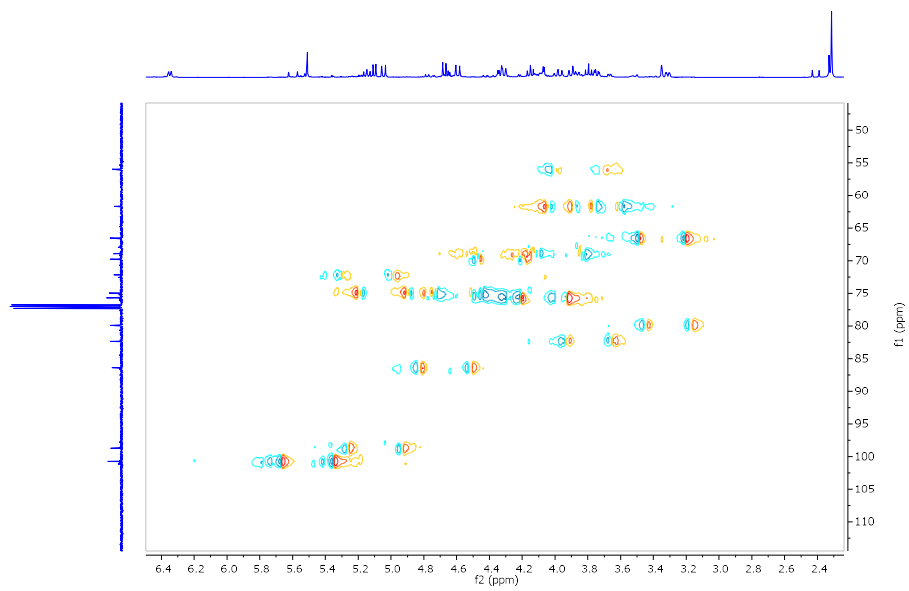

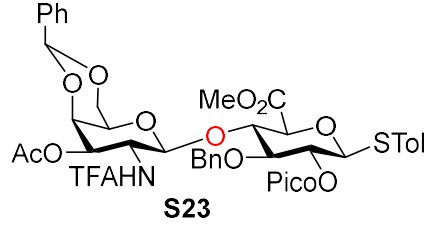

<sup>1</sup>H-NMR (CDCl<sub>3</sub>, 500 MHz) of S23

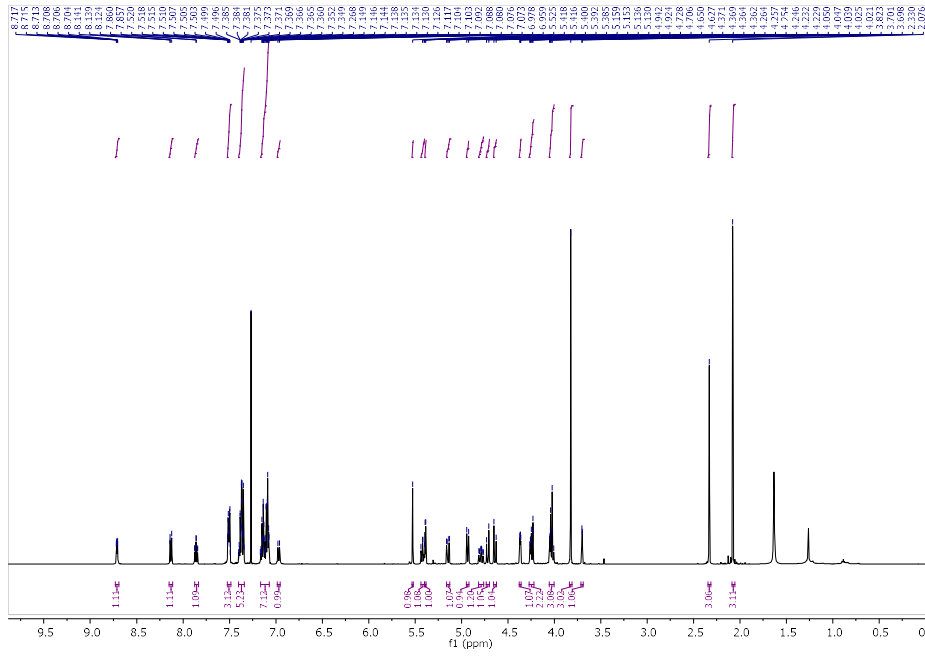

gCOSY (CDCl<sub>3</sub>, 500 MHz) of S23

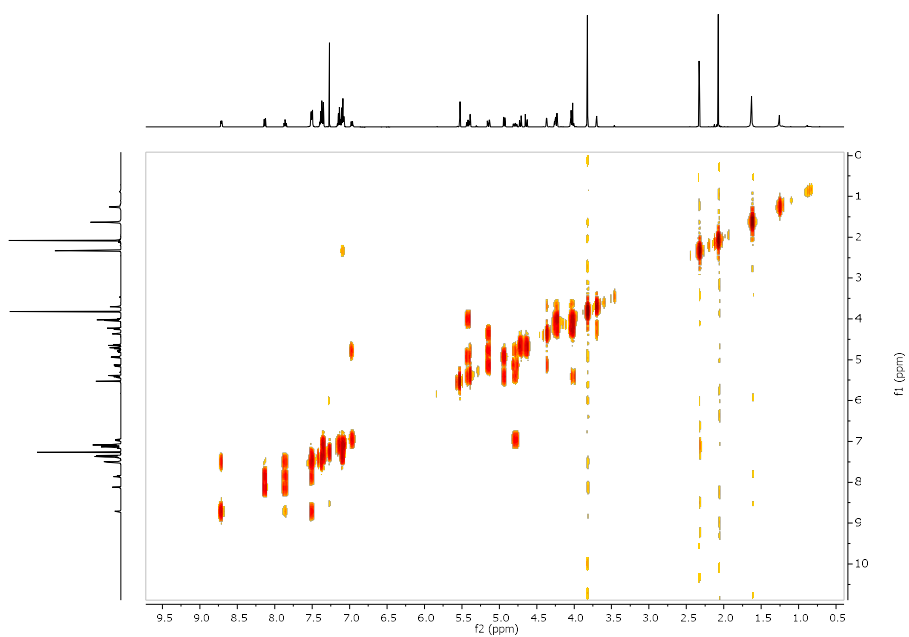

gHSQC (CDCl<sub>3</sub>, 500 MHz) of S23

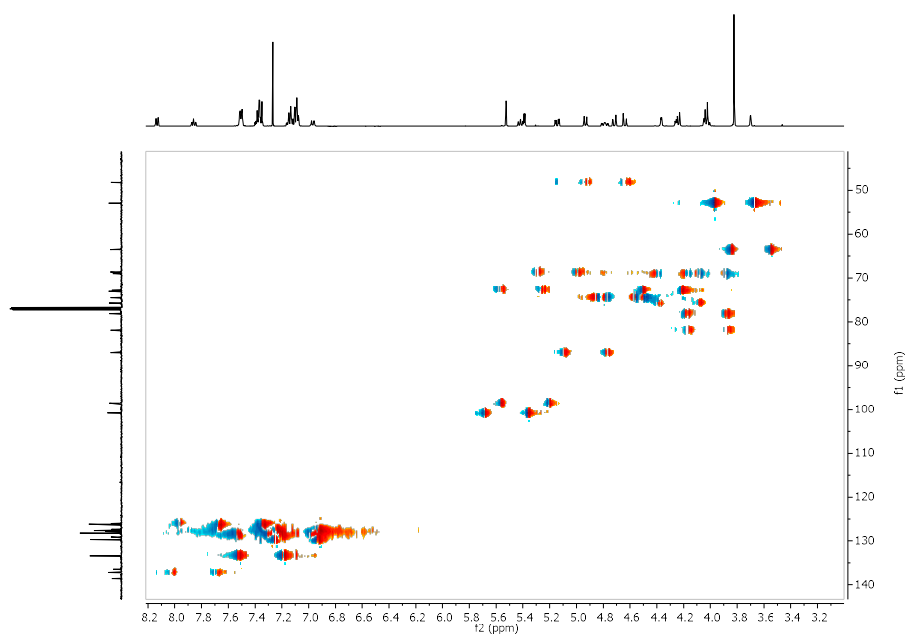



gCOSY (CDCl<sub>3</sub>, 500 MHz) of **15**

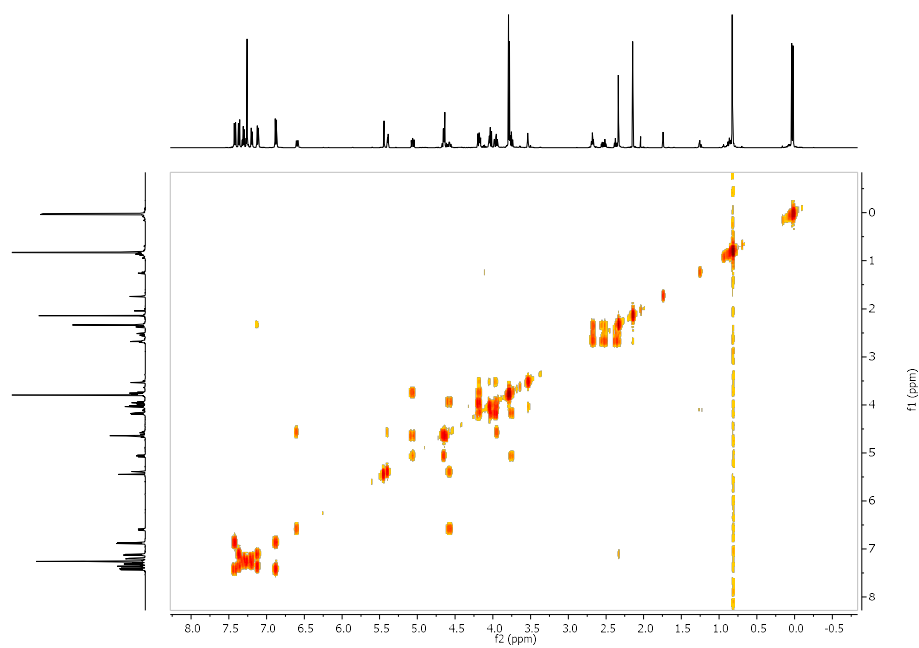

gHSQC (CDCl<sub>3</sub>, 500 MHz) of **15**

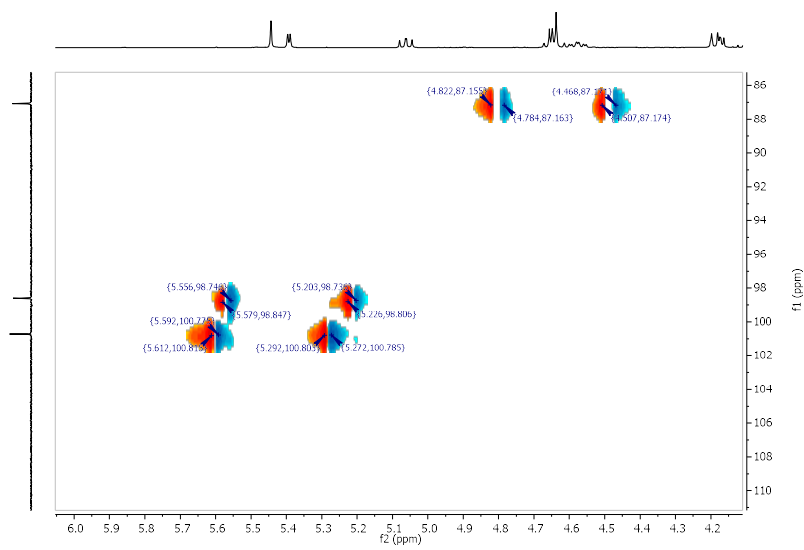





gCOSY (CDCl<sub>3</sub>, 500 MHz) of **17**

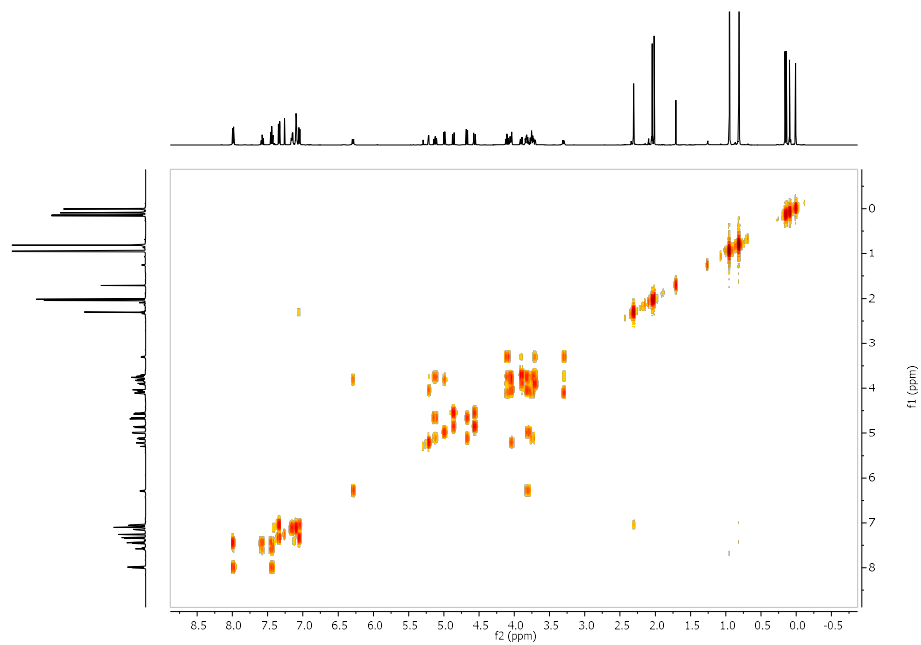

gHSQC (CDCl<sub>3</sub>, 500 MHz) of **17**

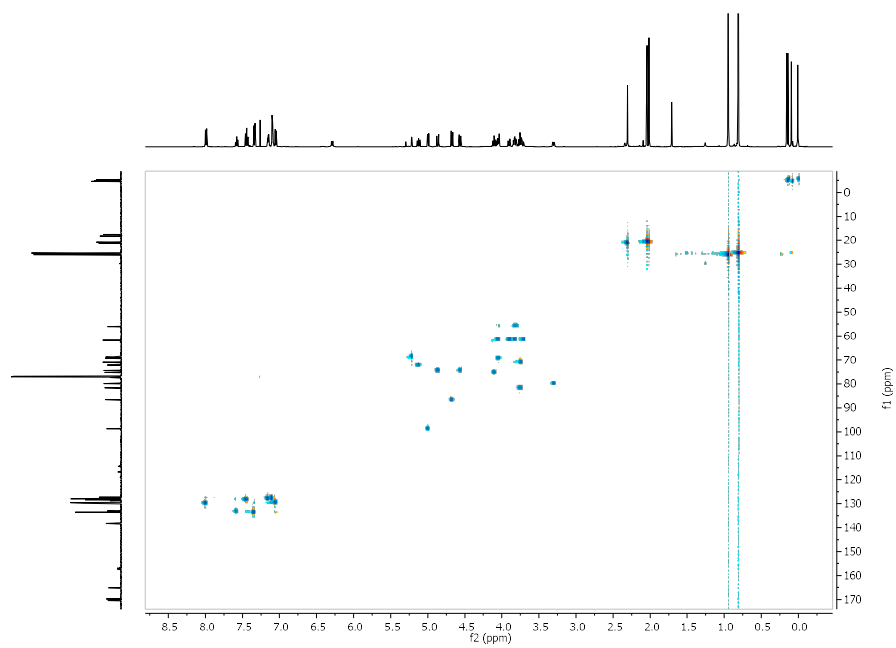

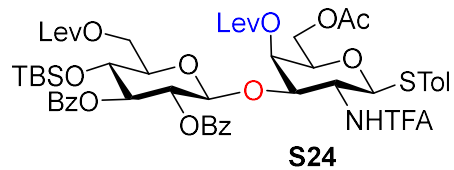

<sup>1</sup>H-NMR (CDCl<sub>3</sub>, 500 MHz) of S24

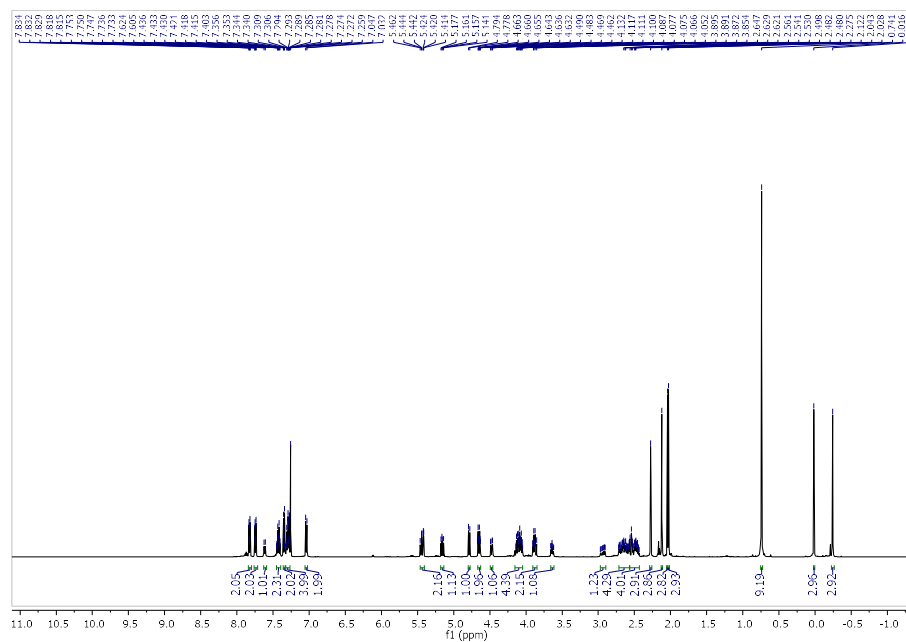

<sup>13</sup>C-NMR (CDCl<sub>3</sub>, 126 MHz) of S24

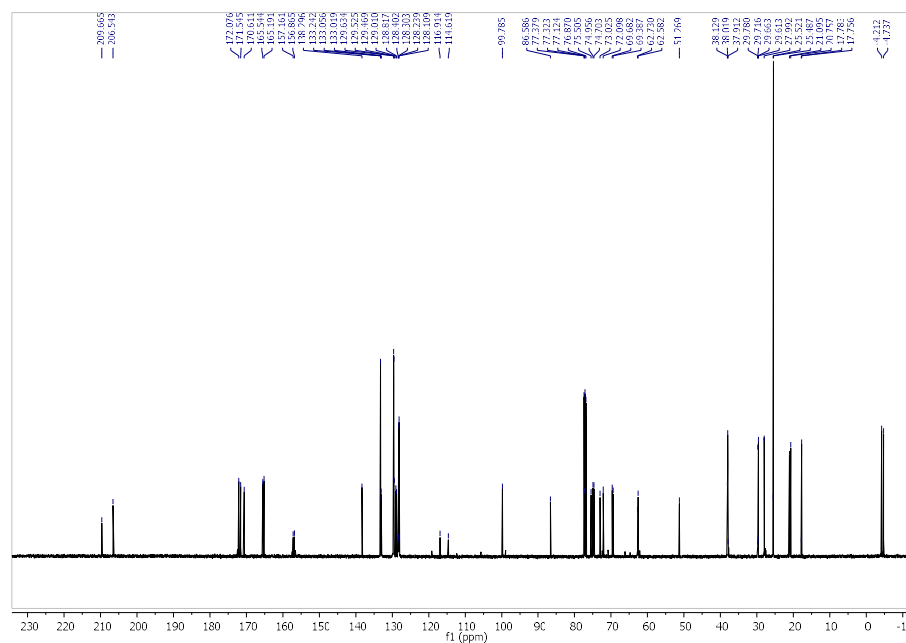

gCOSY (CDCl<sub>3</sub>, 500 MHz) of S24

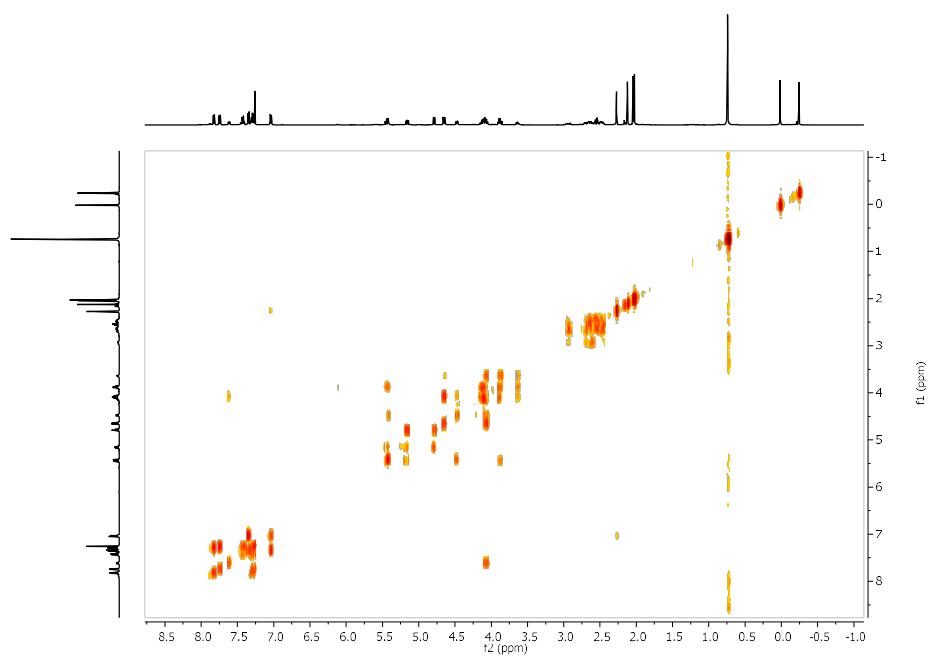

gHSQC (CDCl<sub>3</sub>, 500 MHz) of S24

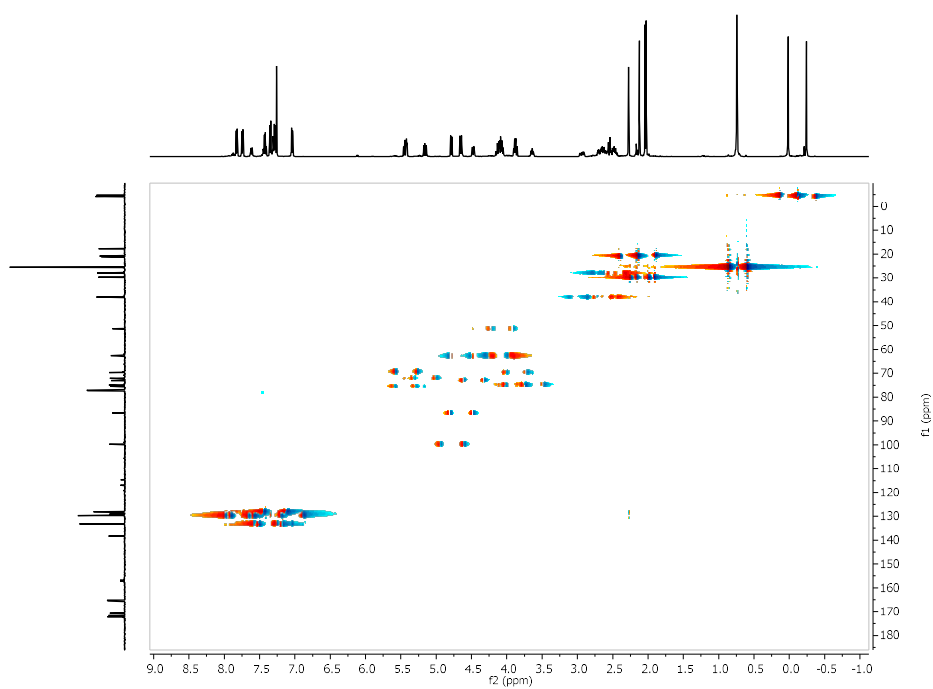

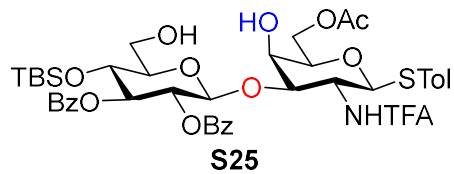

<sup>1</sup>H-NMR (CDCl<sub>3</sub>, 500 MHz) of **S25**

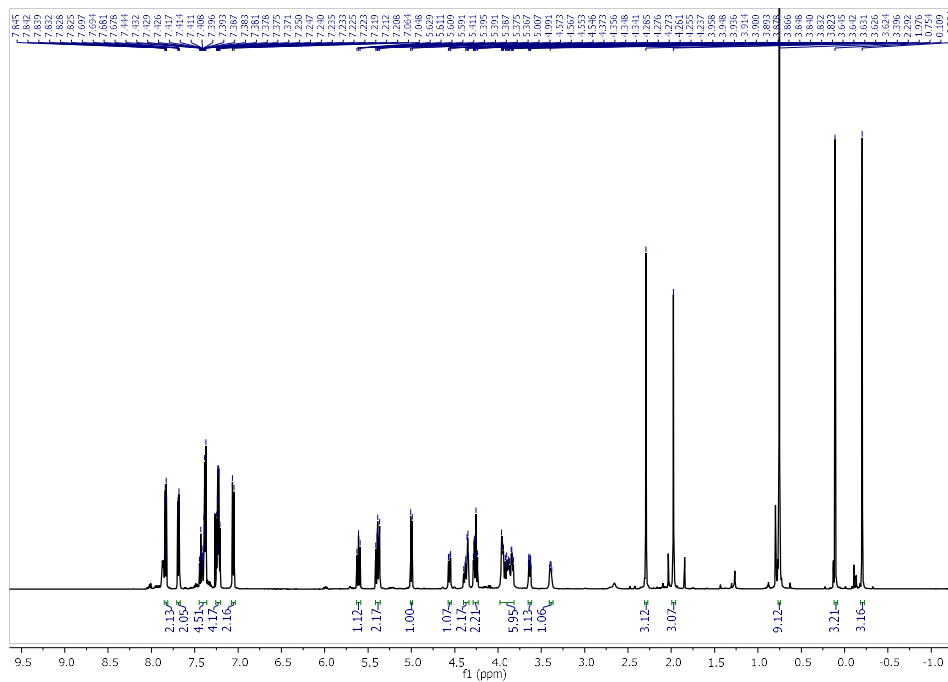

<sup>13</sup>C-NMR (CDCl<sub>3</sub>, 126 MHz) of **S25**

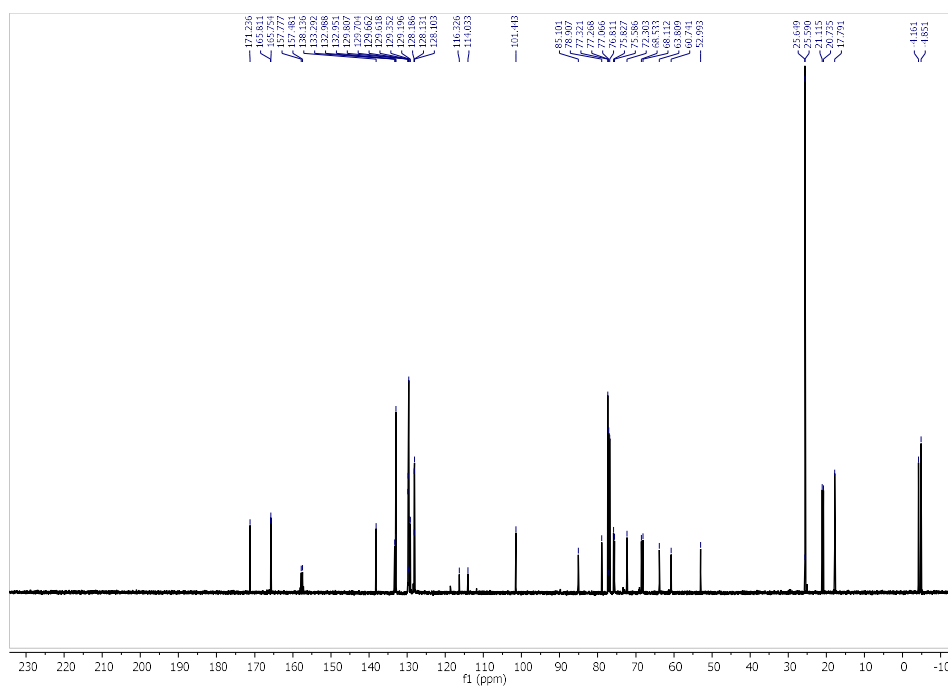

gCOSY (CDCl<sub>3</sub>, 500 MHz) of S25

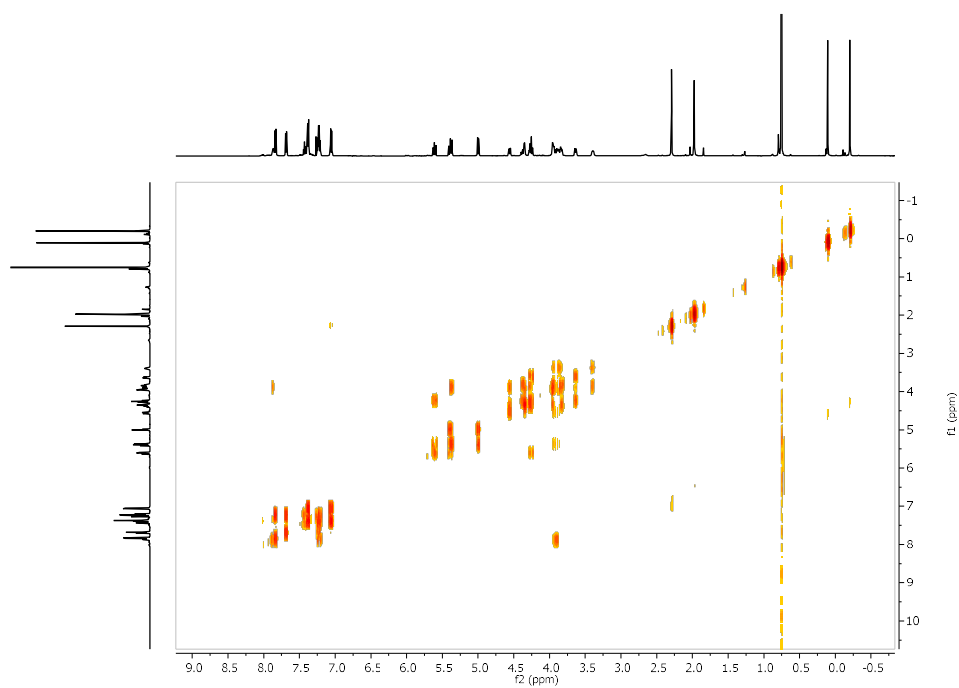

gHSQC (CDCl<sub>3</sub>, 500 MHz) of S25

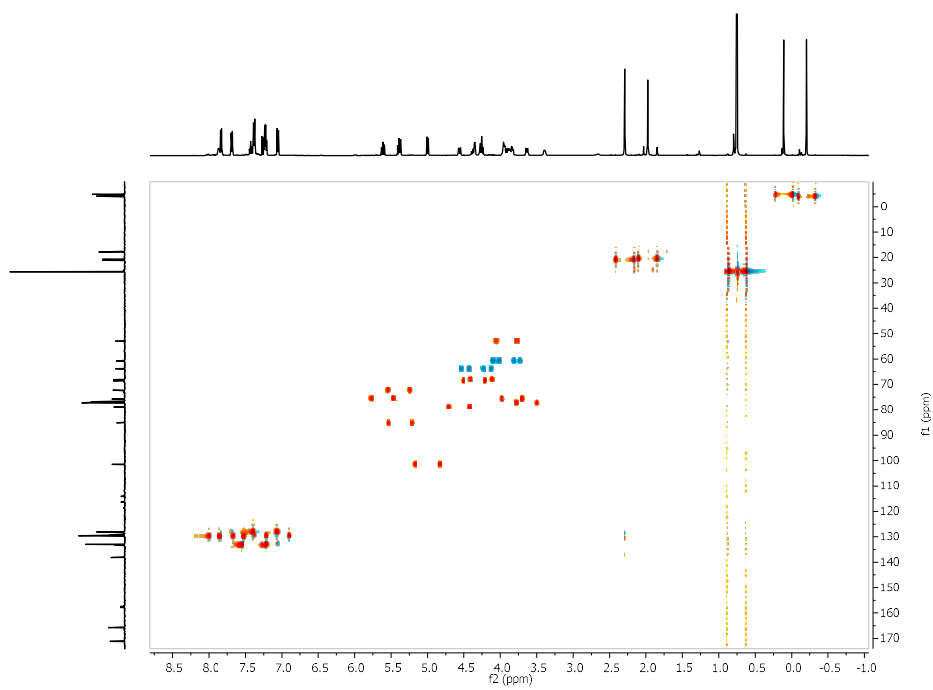

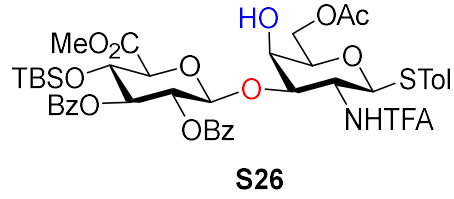

<sup>1</sup>H-NMR (CDCl<sub>3</sub>, 500 MHz) of S26

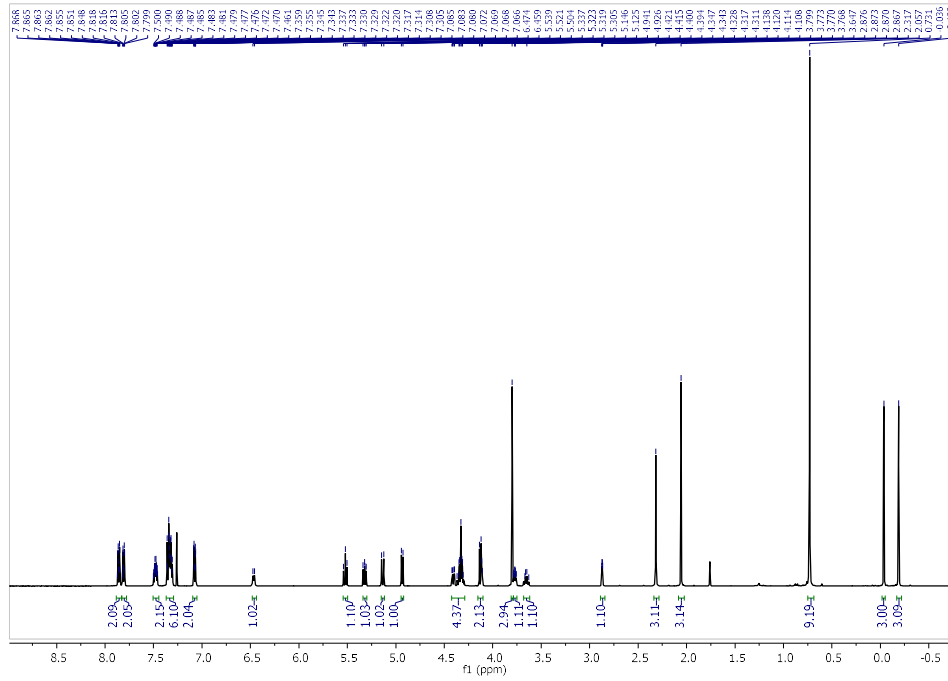

gCOSY (CDCl<sub>3</sub>, 500 MHz) of S26

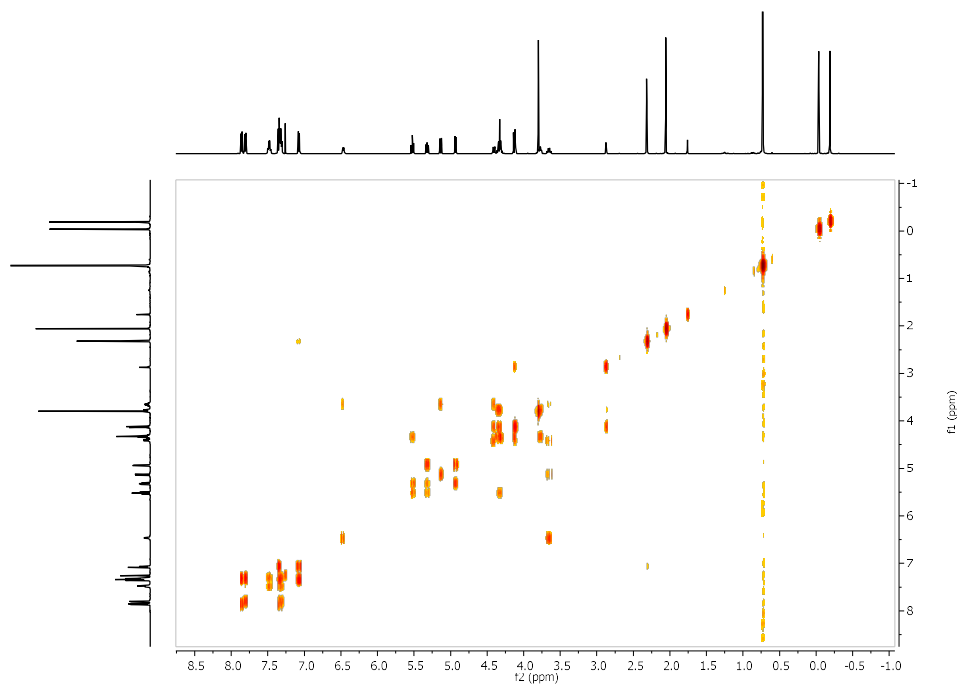

gHSQC (CDCl<sub>3</sub>, 500 MHz) of S26

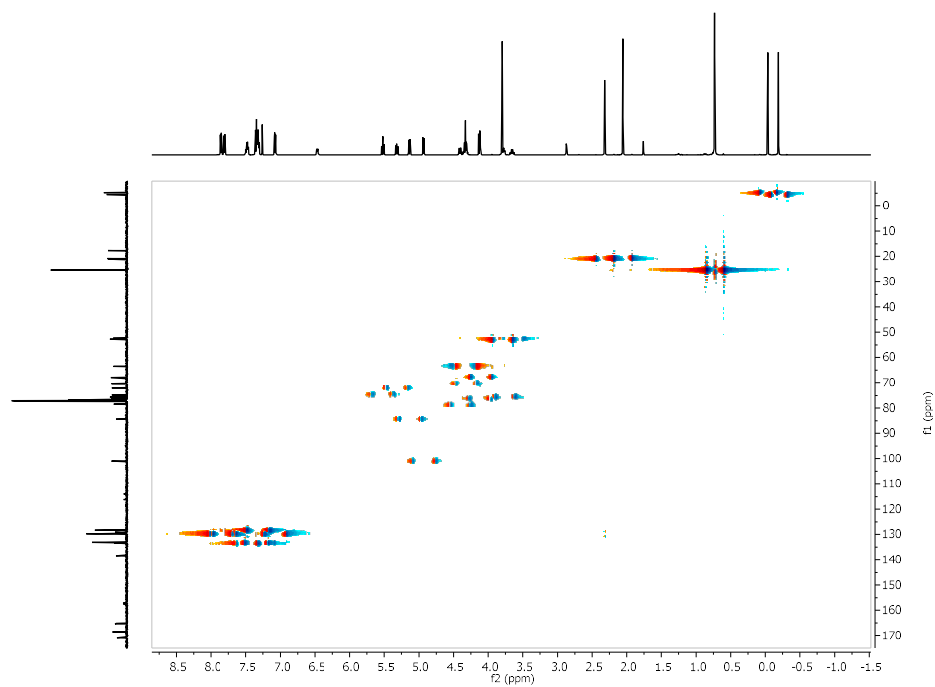

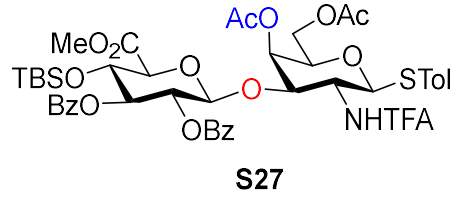

<sup>1</sup>H-NMR (CDCl<sub>3</sub>, 500 MHz) of S27

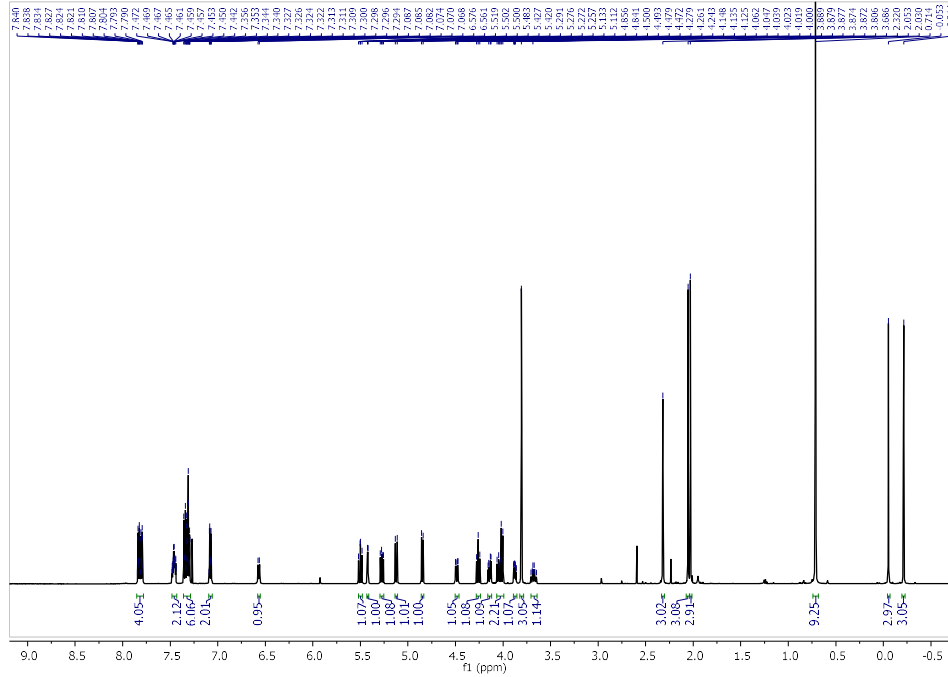

<sup>13</sup>C-NMR (CDCl<sub>3</sub>, 126 MHz) of S27

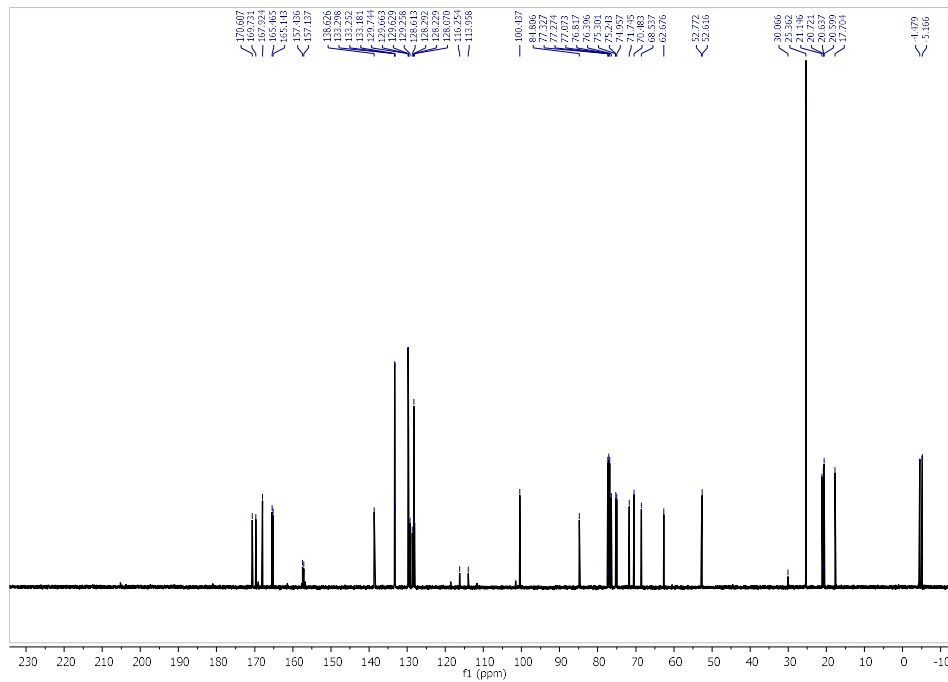



gCOSY (CDCl<sub>3</sub>, 500 MHz) of S27

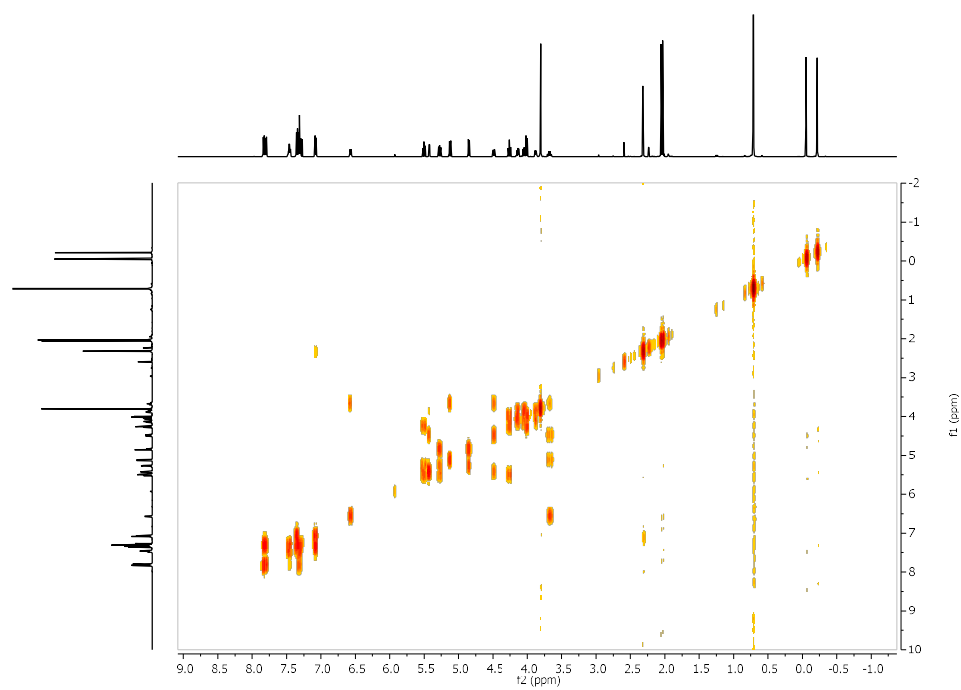

gHSQC (CDCl<sub>3</sub>, 500 MHz) of S27

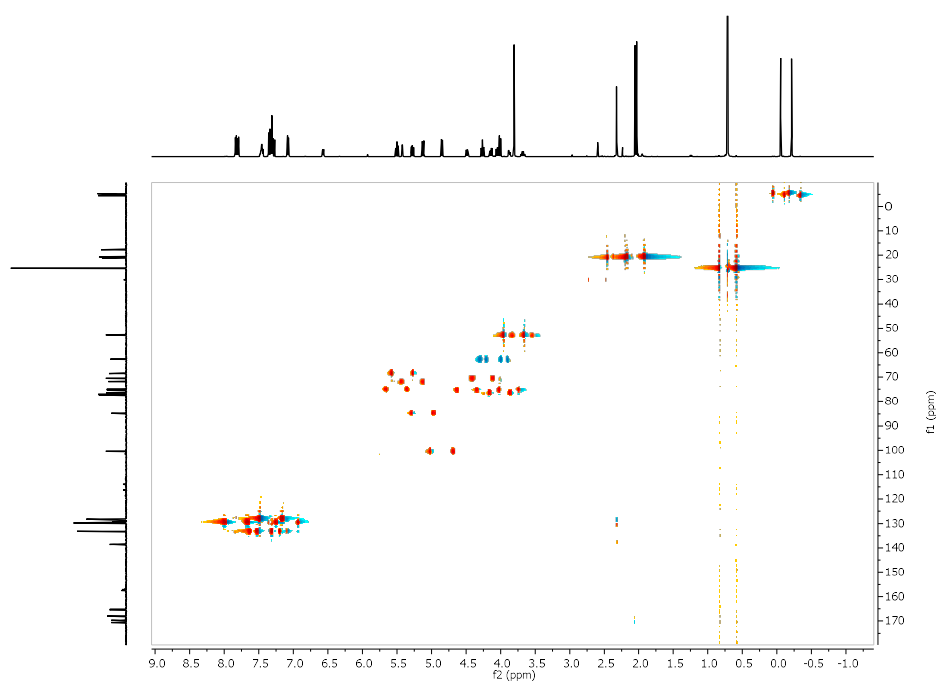

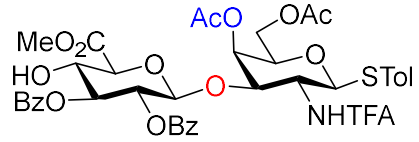

18

$^1\text{H-NMR}$  ( $\text{CDCl}_3$ , 500 MHz) of 18

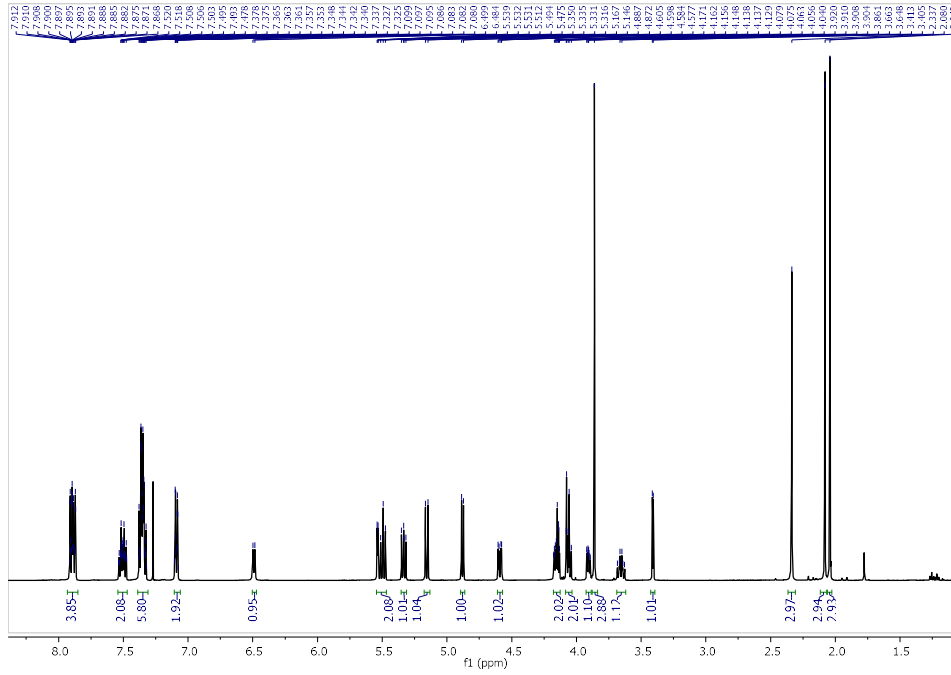

$^{13}\text{C-NMR}$  ( $\text{CDCl}_3$ , 126 MHz) of 18

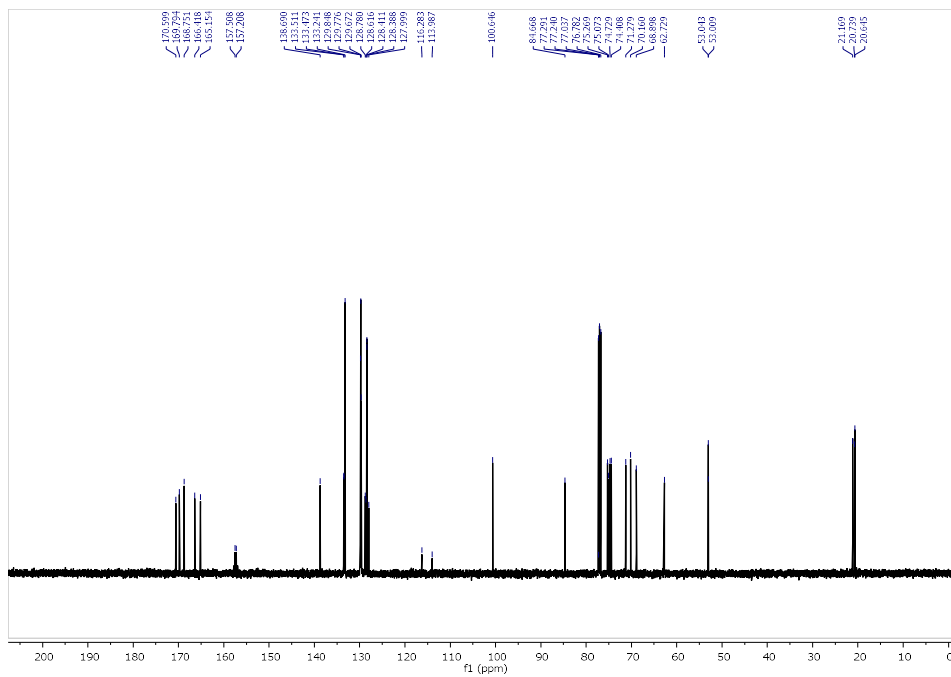

gCOSY (CDCl<sub>3</sub>, 500 MHz) of **18**

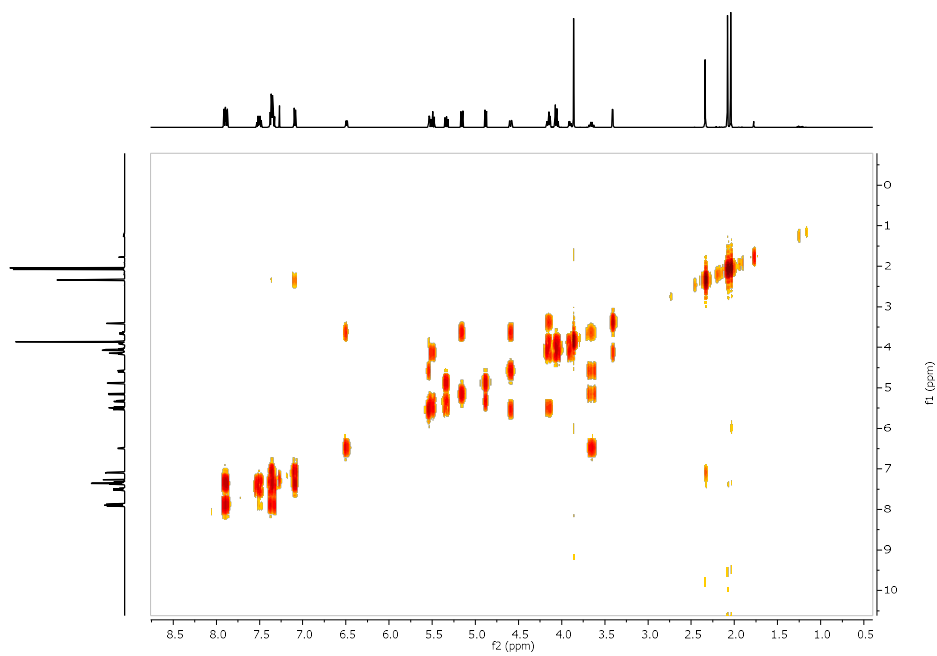

gHSQC (CDCl<sub>3</sub>, 500 MHz) of **18**

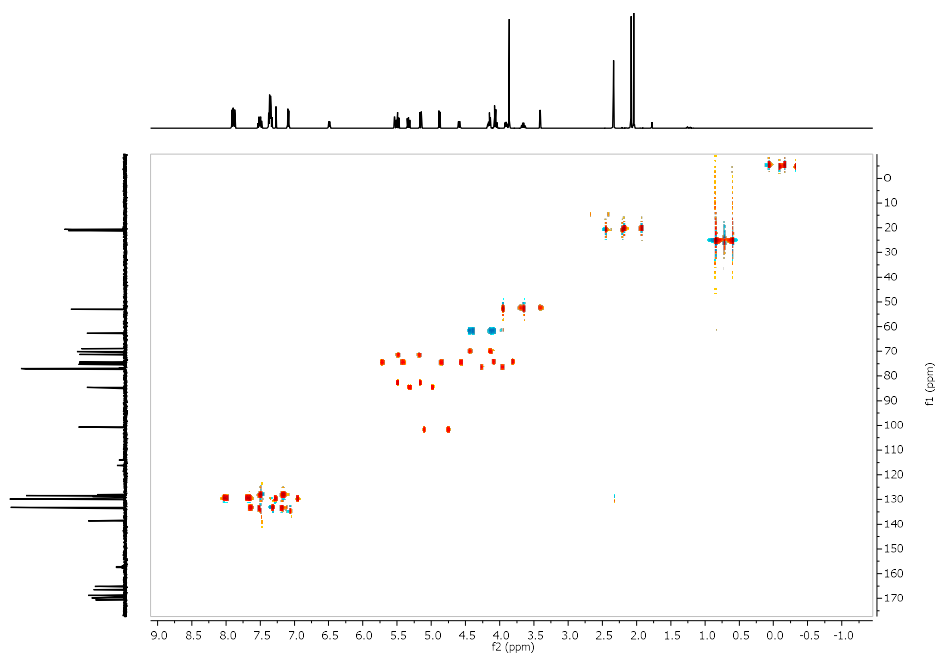

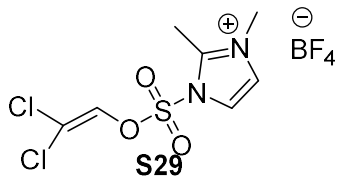

$^1\text{H-NMR}$  ( $\text{CDCl}_3$ , 500 MHz) of **S29**

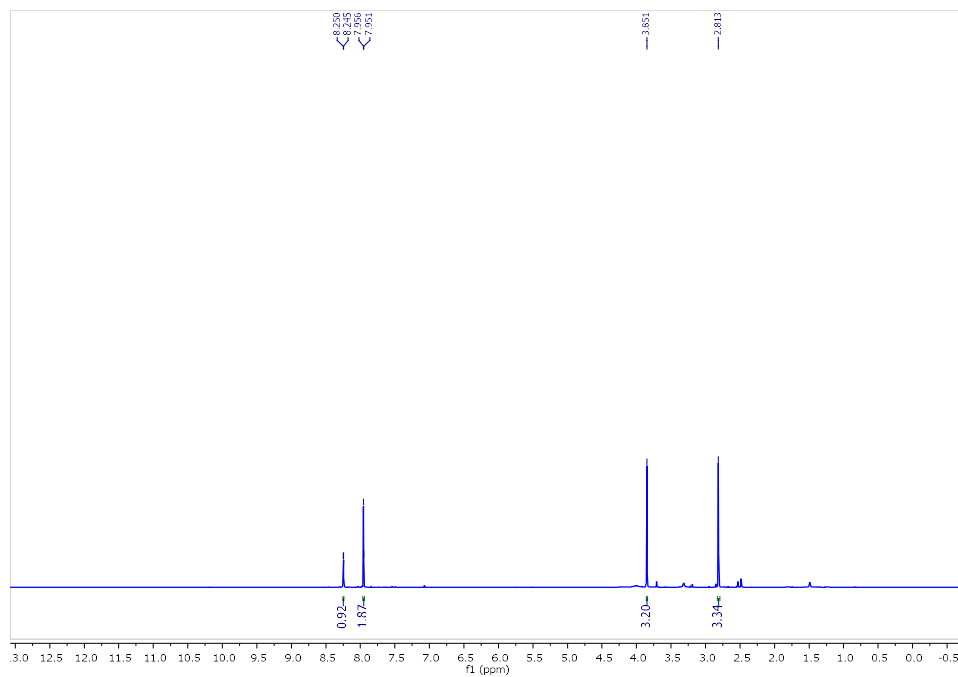

$^{13}\text{C-NMR}$  ( $\text{CDCl}_3$ , 126 MHz) of **S29**

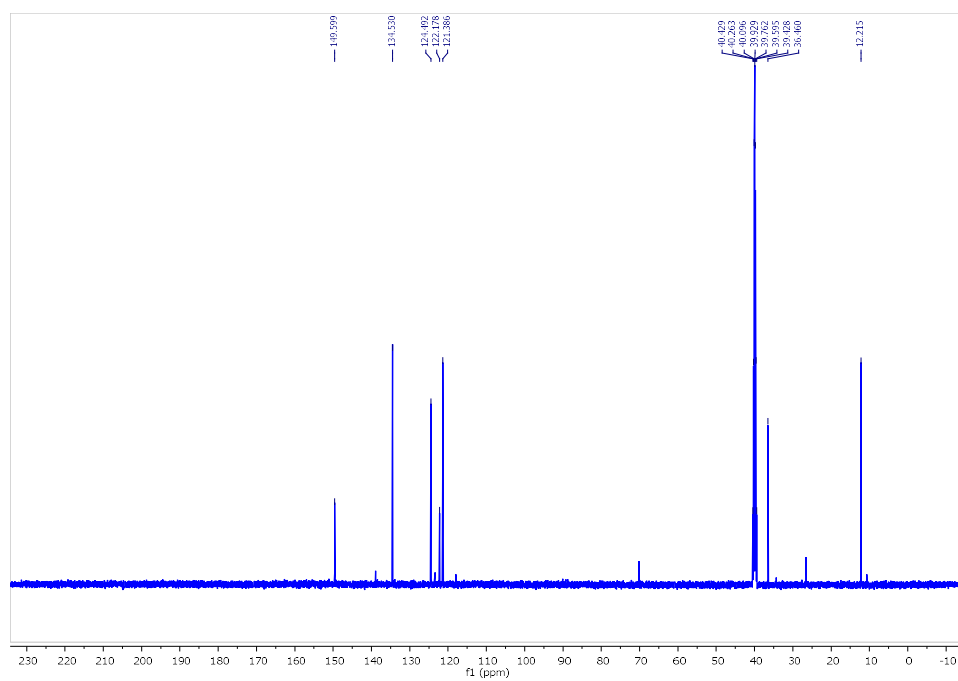

$^{19}\text{F}$ -NMR ( $\text{CDCl}_3$ , 500 MHz) of **S29**

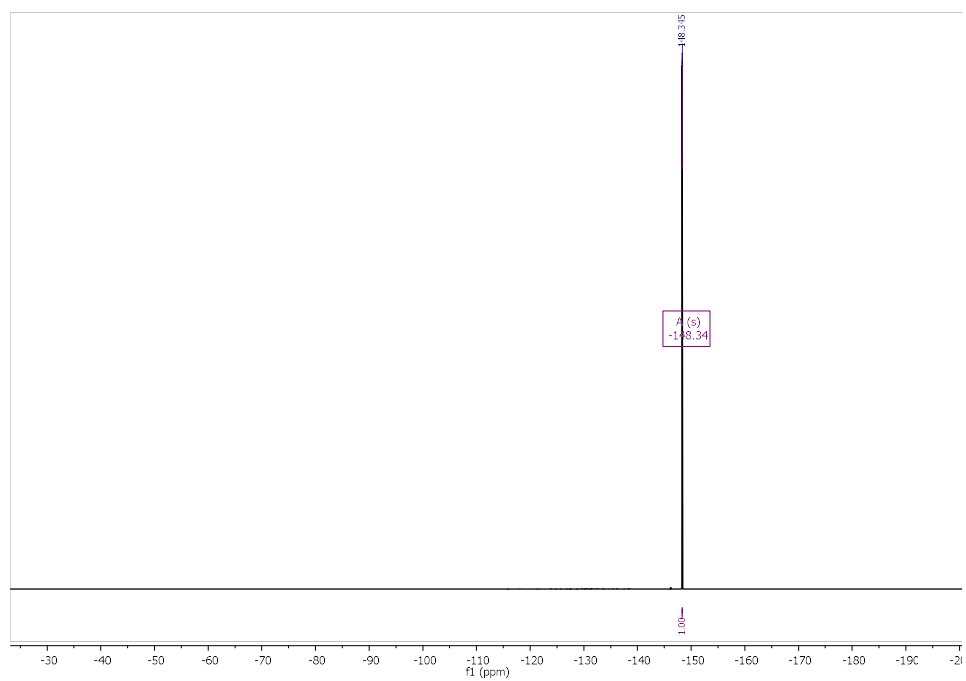



gCOSY (CDCl<sub>3</sub>, 500 MHz) of **20**

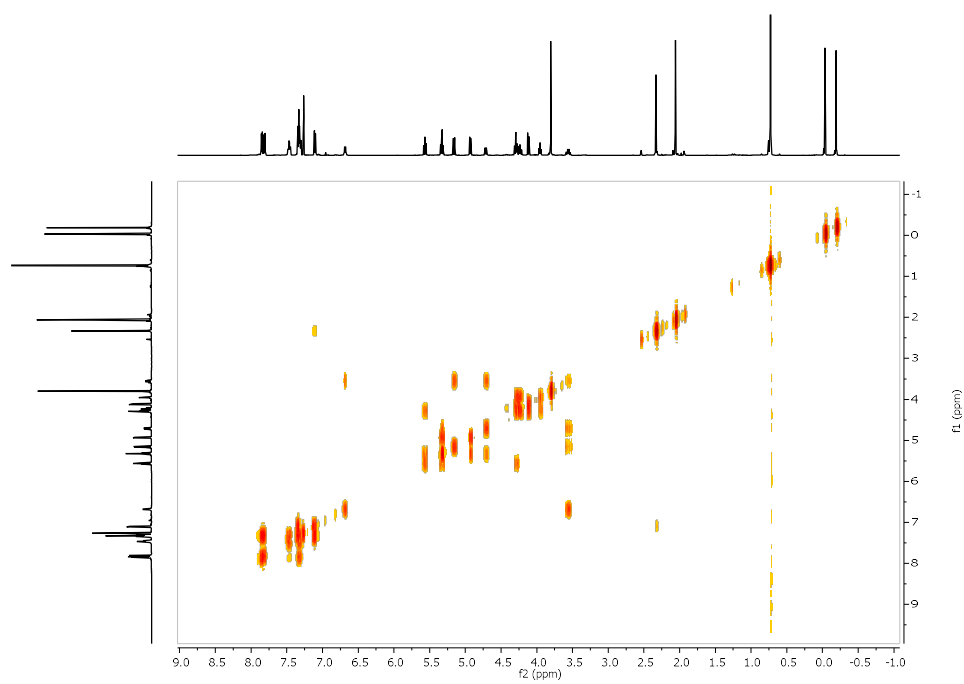

gHSQC (CDCl<sub>3</sub>, 500 MHz) of **20**

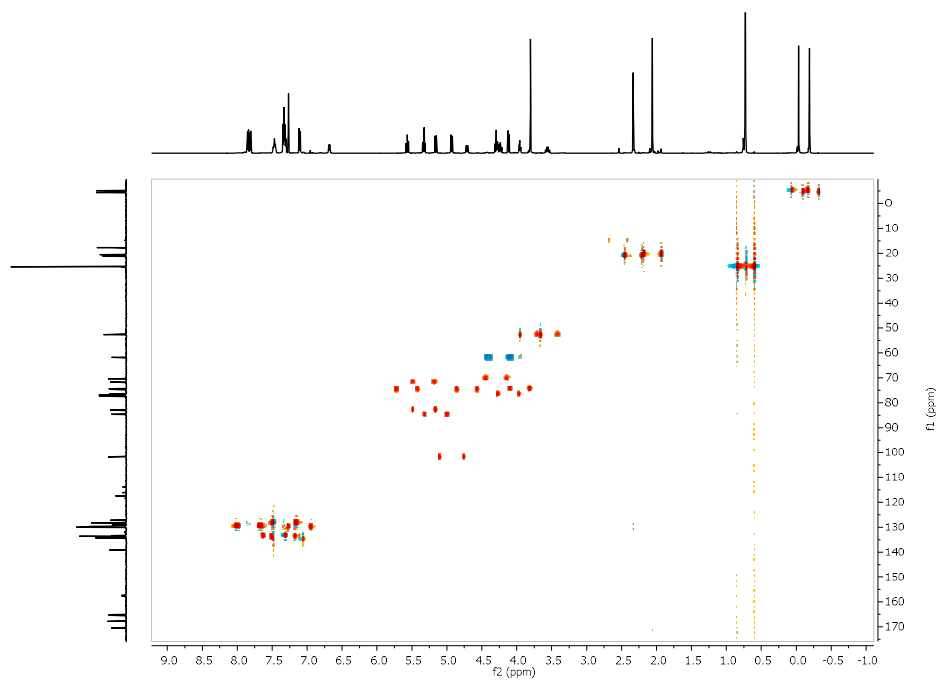

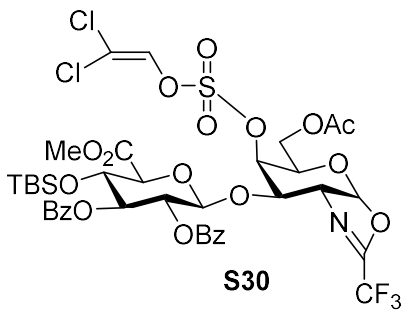

<sup>1</sup>H-NMR (CDCl<sub>3</sub>, 500 MHz) of **S30**

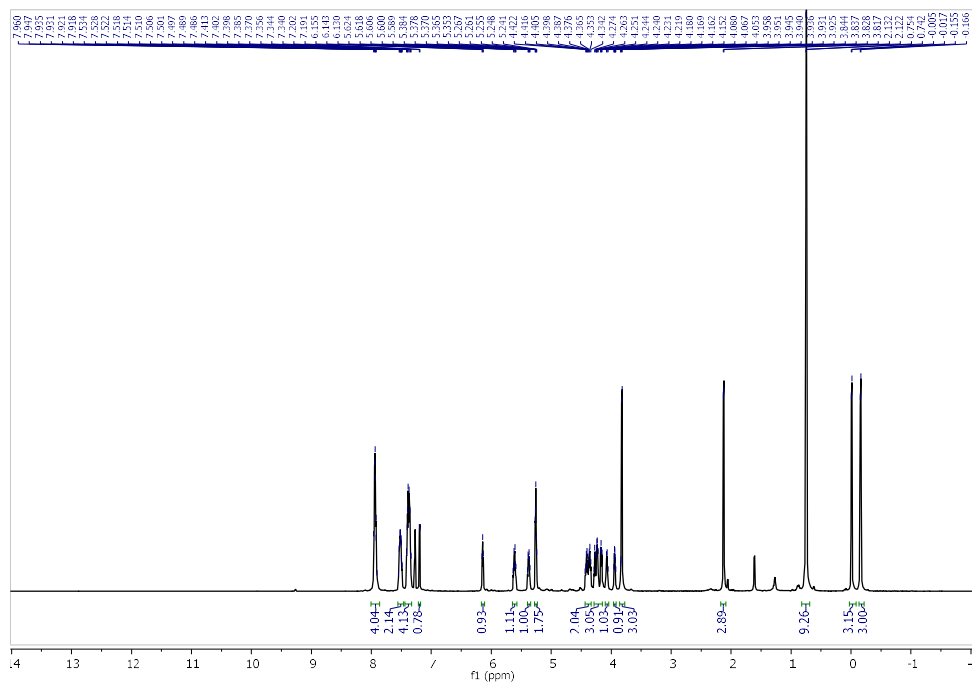



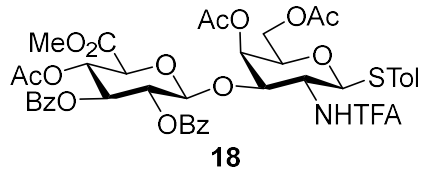

<sup>1</sup>H-NMR (CDCl<sub>3</sub>, 500 MHz) of **18**

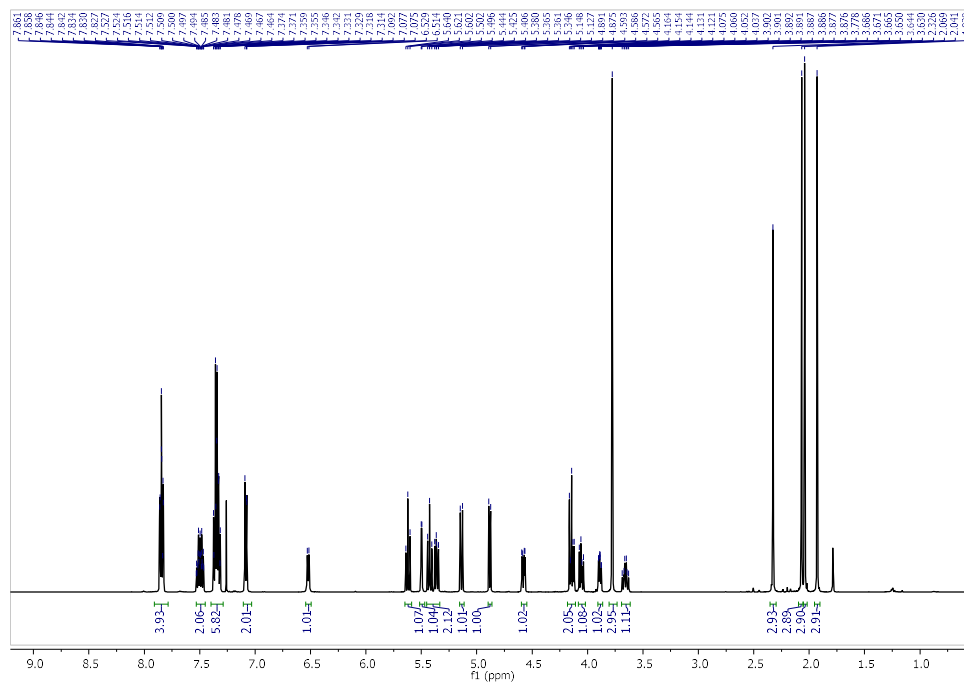

gCOSY (CDCl<sub>3</sub>, 500 MHz) of **18**

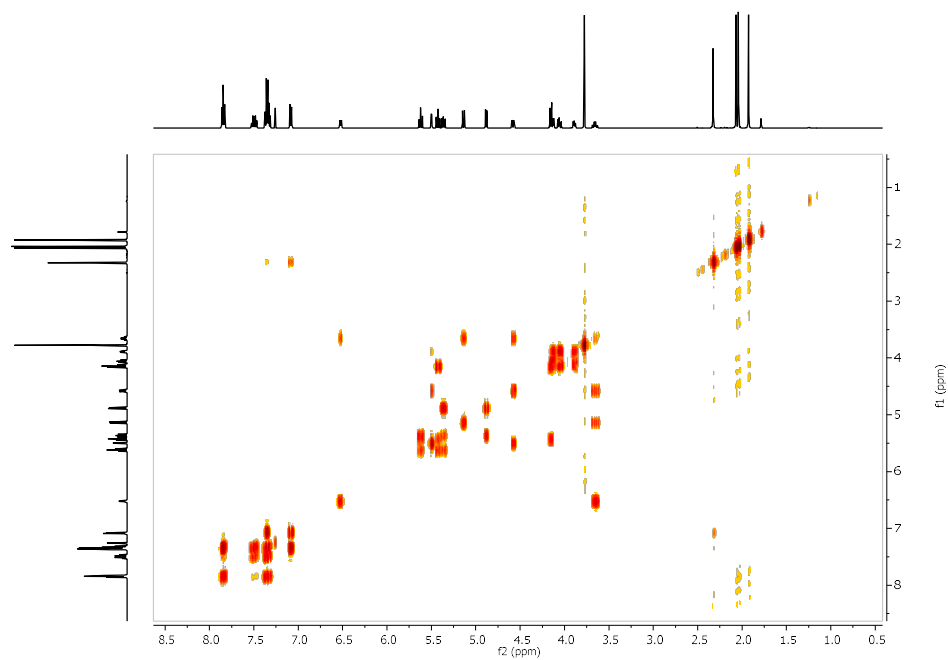



gCOSY (CDCl<sub>3</sub>, 500 MHz) of **19**

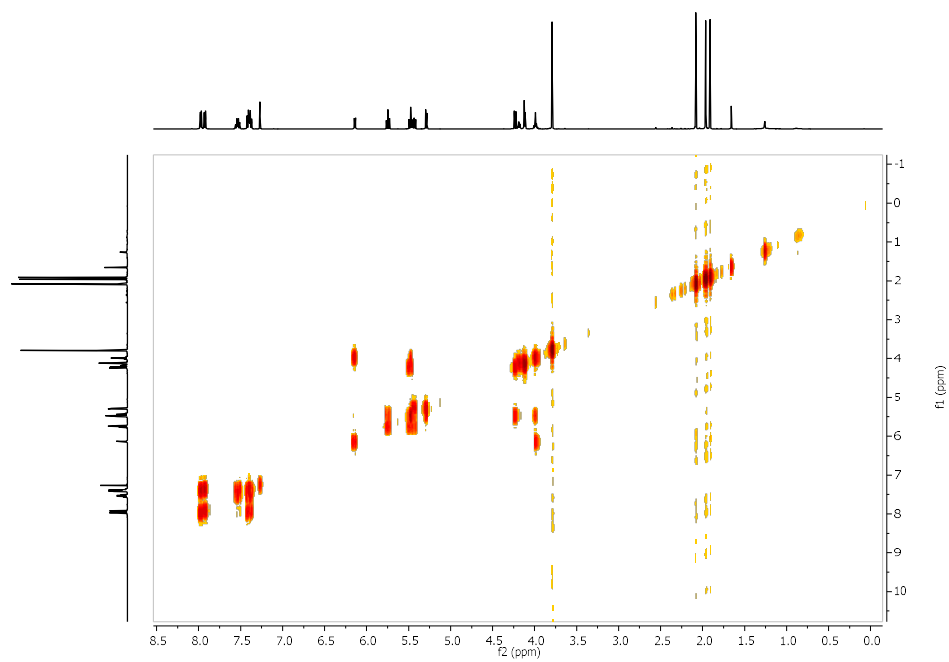

gHSQC (CDCl<sub>3</sub>, 500 MHz) of **19**

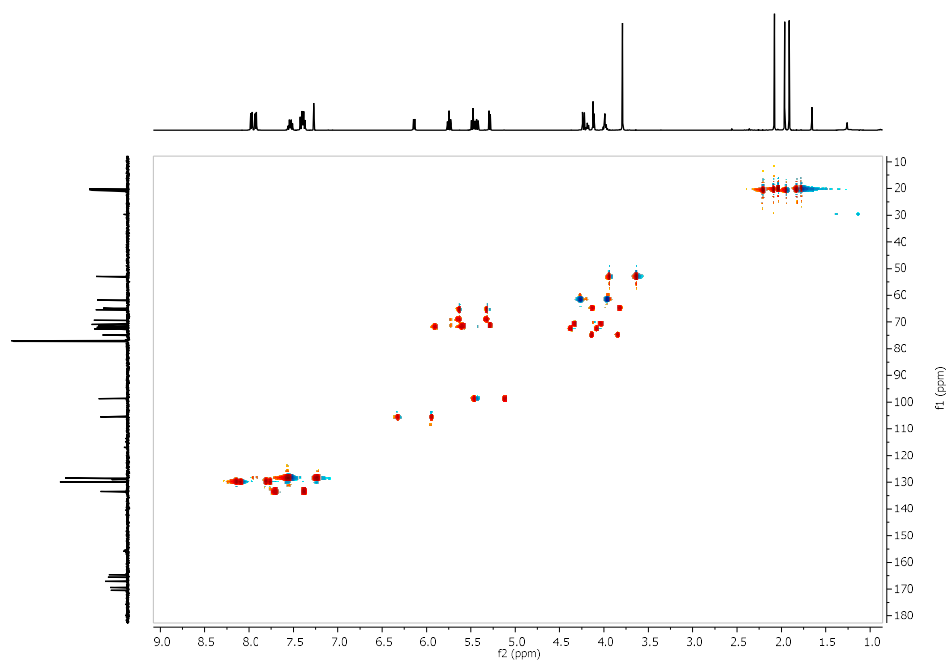





gCOSY (CDCl<sub>3</sub>, 500 MHz) of S31

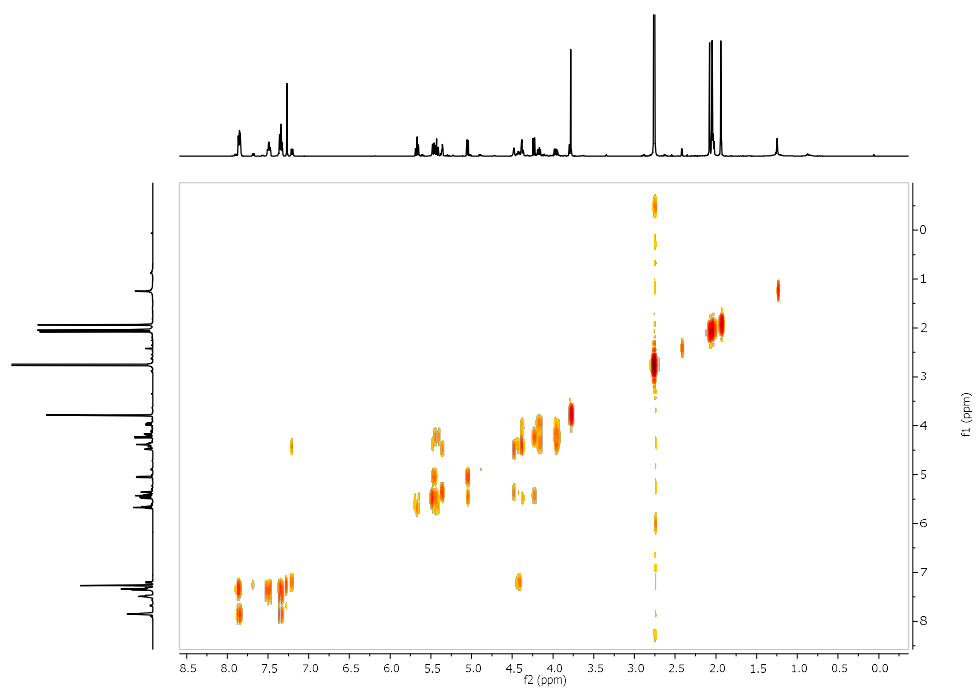

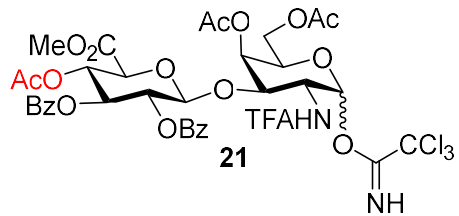

<sup>1</sup>H-NMR (CDCl<sub>3</sub>, 500 MHz) of **21**

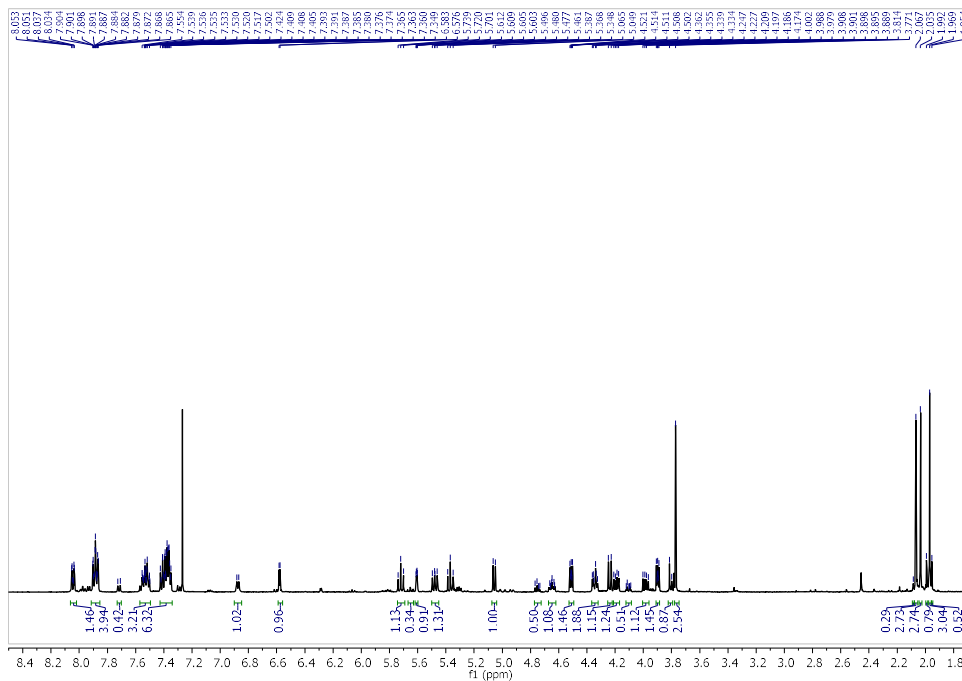

<sup>13</sup>C-NMR (CDCl<sub>3</sub>, 126 MHz) of **21**

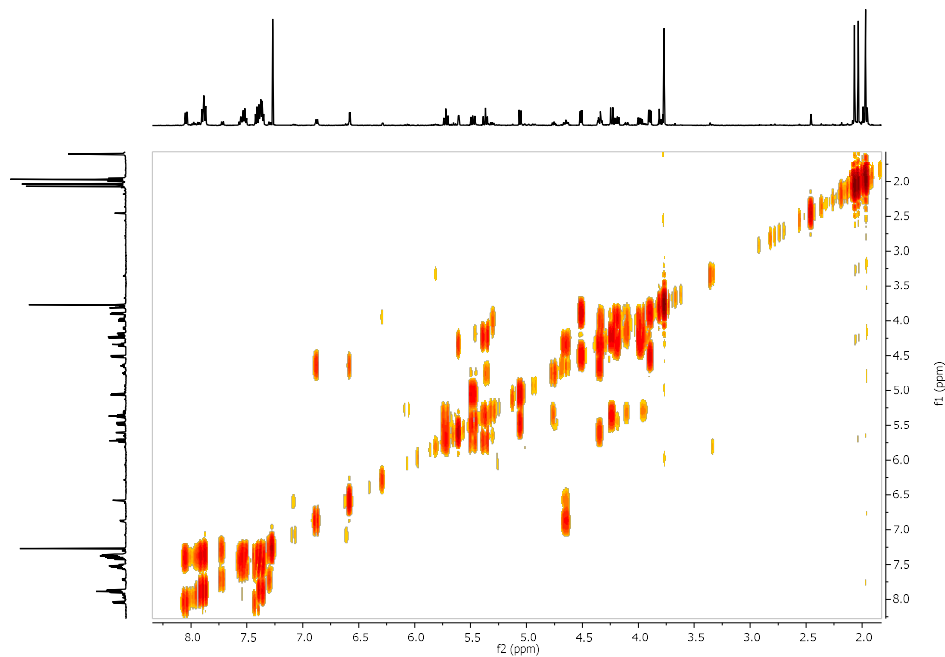



gHSQC (CDCl<sub>3</sub>, 500 MHz) of **21**

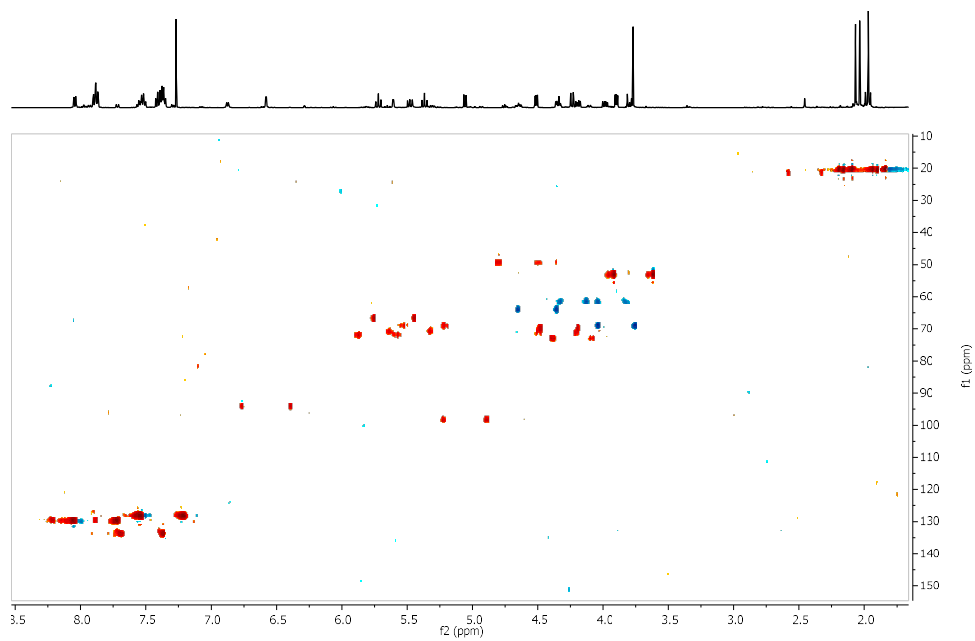



gCOSY (CDCl<sub>3</sub>, 500 MHz) of **25**

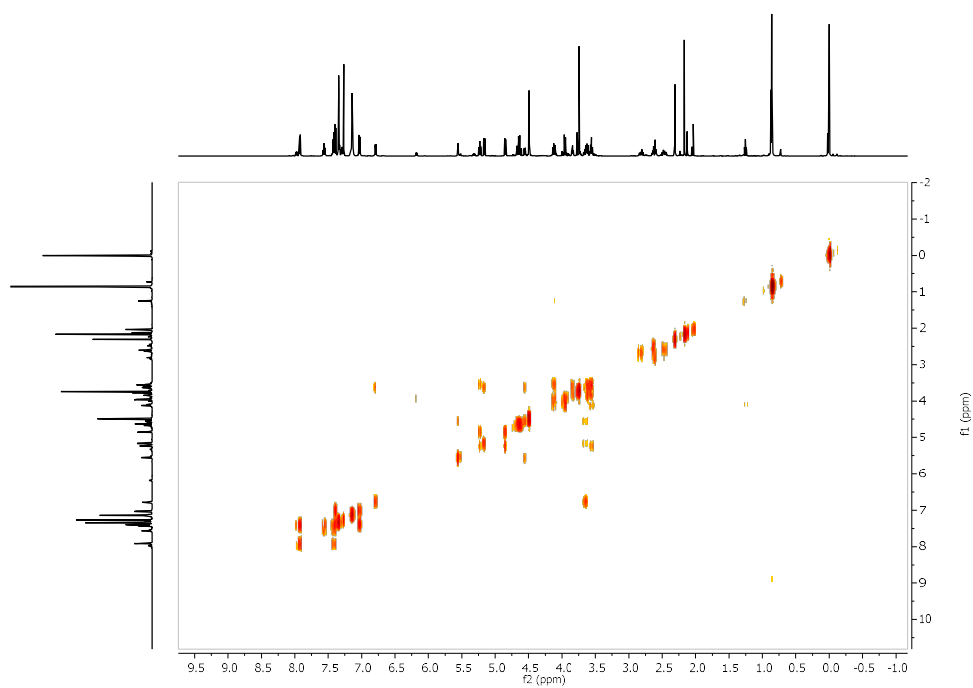

gHSQC (CDCl<sub>3</sub>, 500 MHz) of **25**

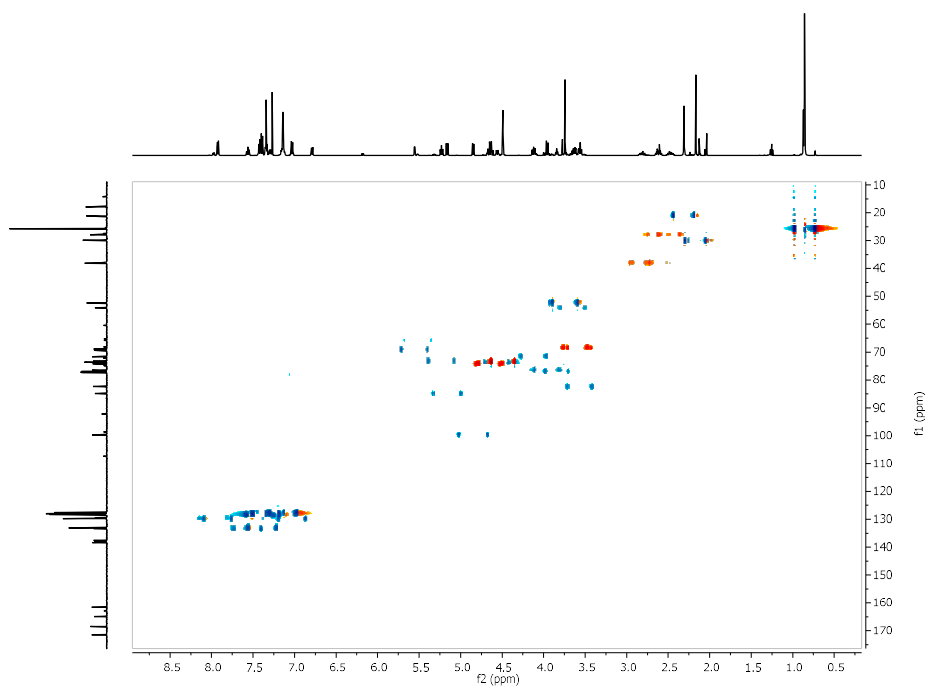

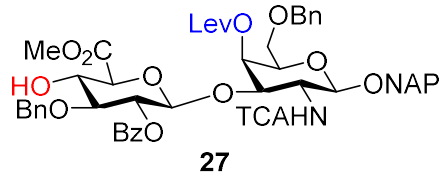

<sup>1</sup>H-NMR (CDCl<sub>3</sub>, 500 MHz) of 27

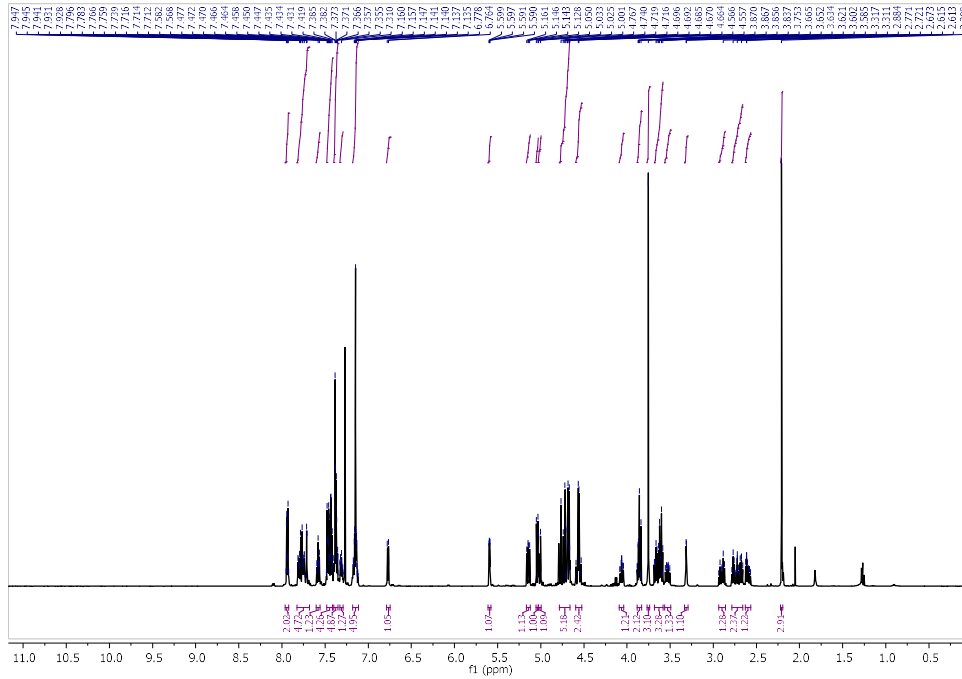

<sup>13</sup>C-NMR (CDCl<sub>3</sub>, 126 MHz) of 27

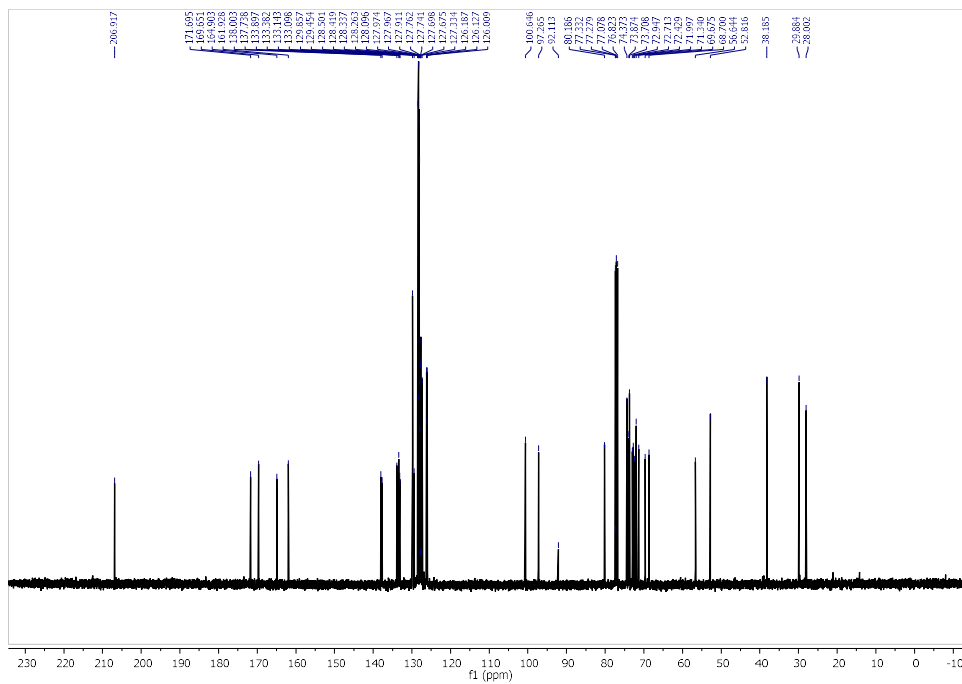

gCOSY (CDCl<sub>3</sub>, 500 MHz) of 27

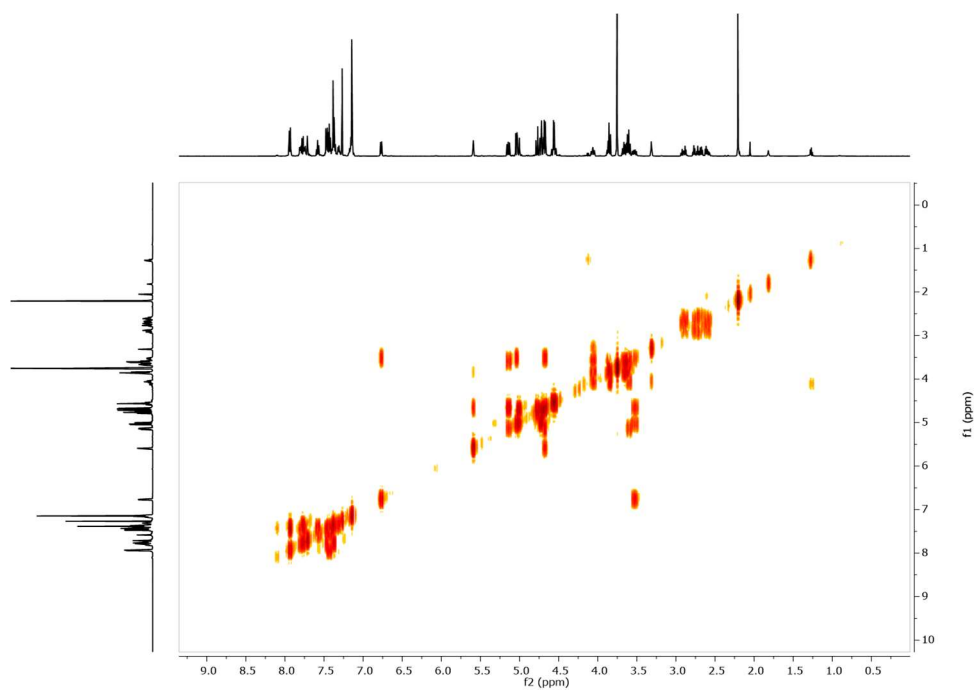

gHSQC (CDCl<sub>3</sub>, 500 MHz) of 27

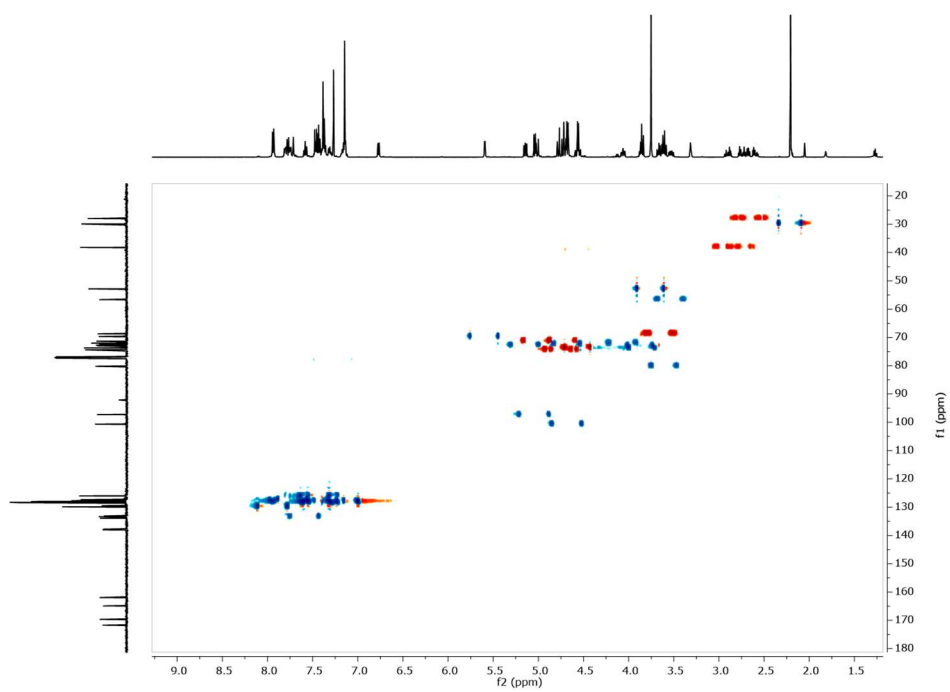

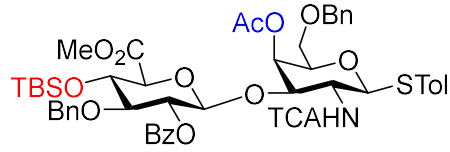

26

<sup>1</sup>H-NMR (CDCl<sub>3</sub>, 500 MHz) of 26

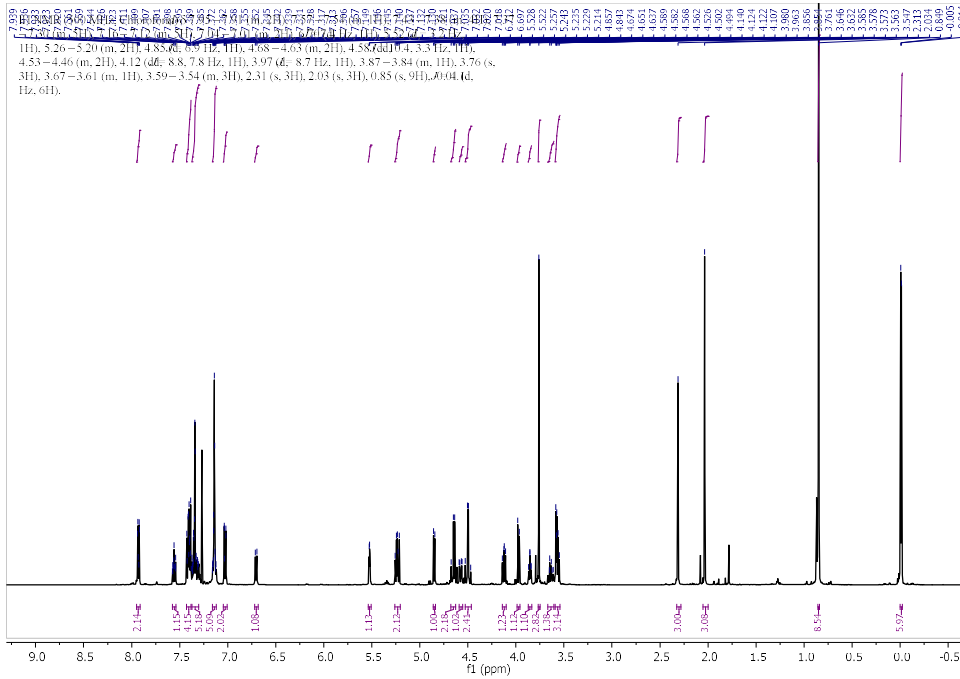

<sup>13</sup>C-NMR (CDCl<sub>3</sub>, 126 MHz) of 26

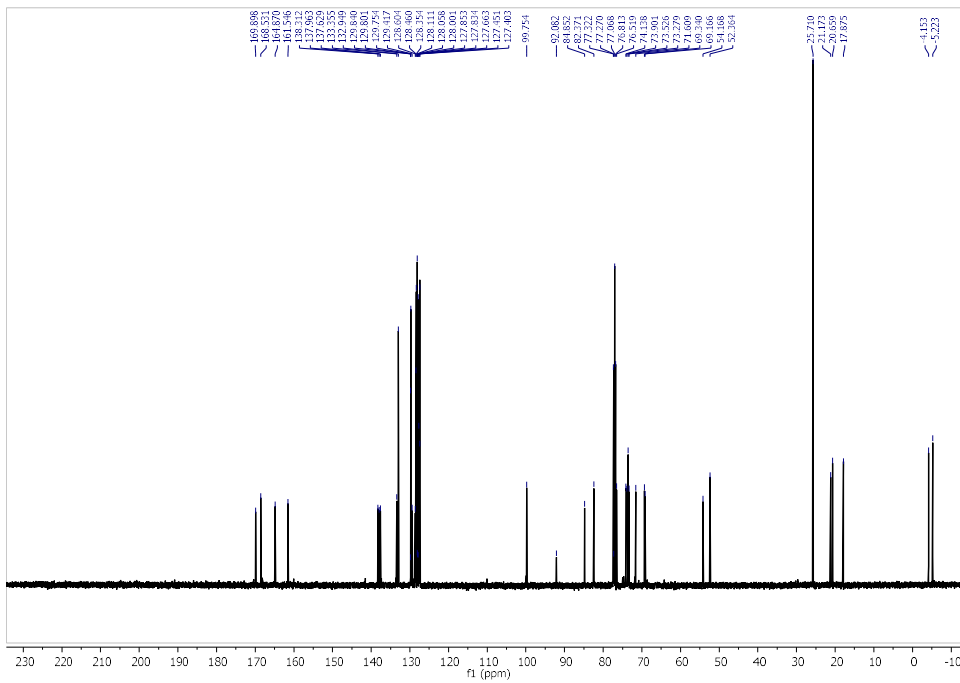

gCOSY (CDCl<sub>3</sub>, 500 MHz) of **26**

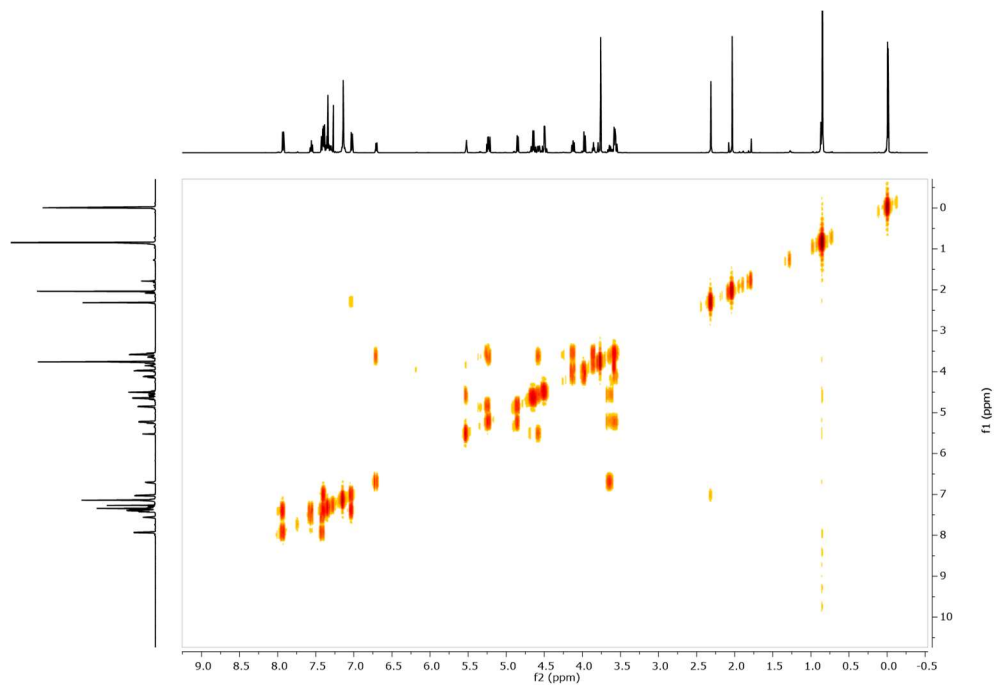

gHSQC (CDCl<sub>3</sub>, 500 MHz) of **26**

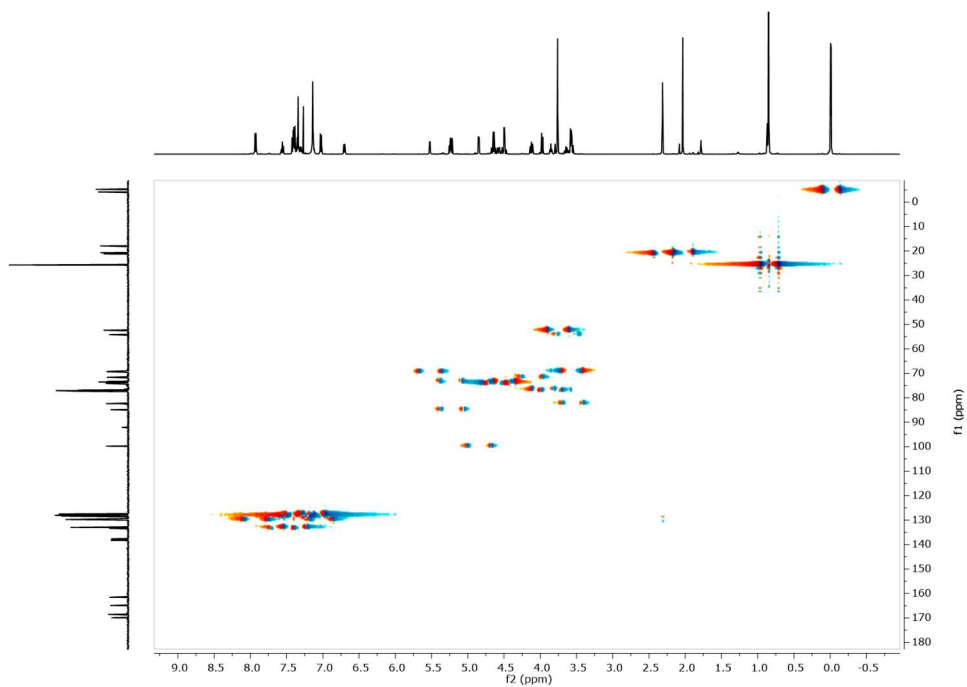

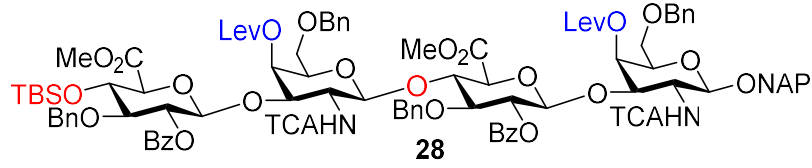

$^1\text{H-NMR}$  ( $\text{CDCl}_3$ , 500 MHz) of **28**

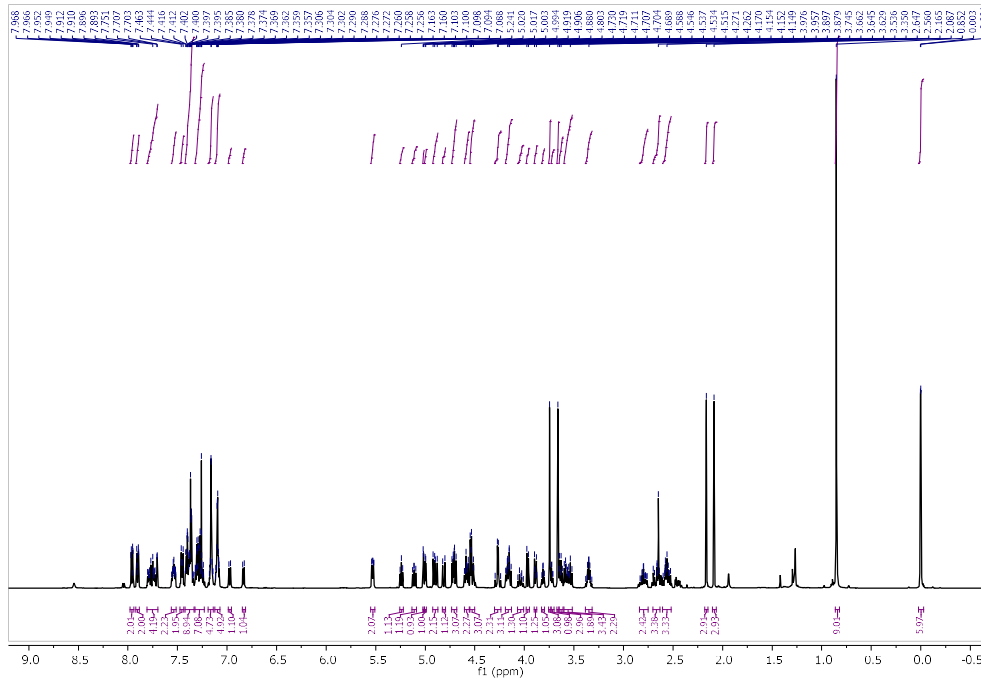

$^{13}\text{C-NMR}$  ( $\text{CDCl}_3$ , 126 MHz) of **28**

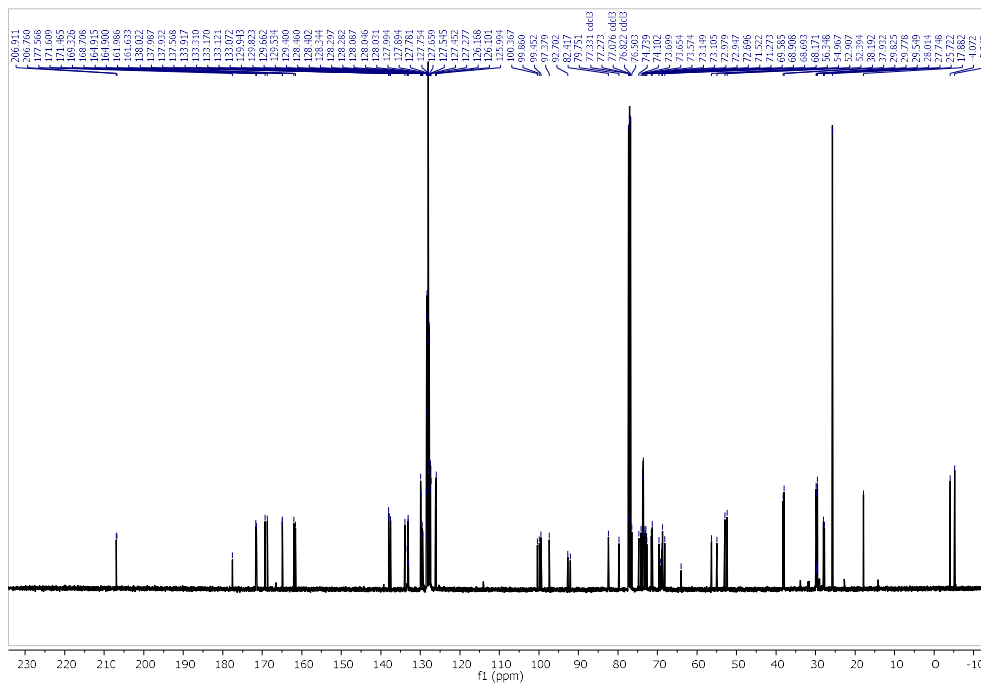



gCOSY (CDCl<sub>3</sub>, 500 MHz) of **28**

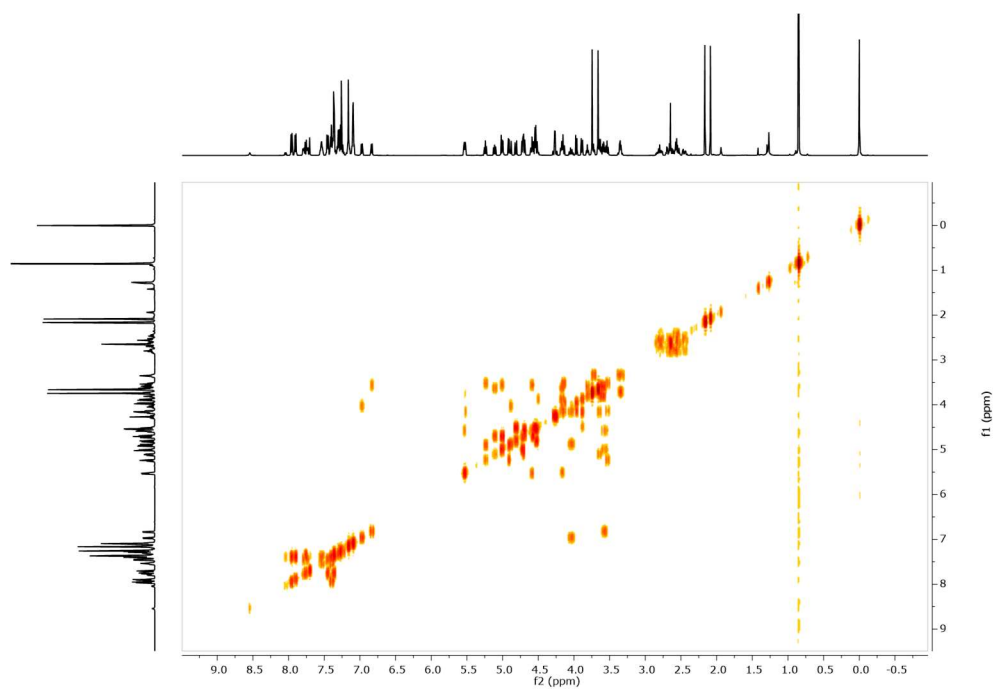

gHSQC (CDCl<sub>3</sub>, 500 MHz) of **28**

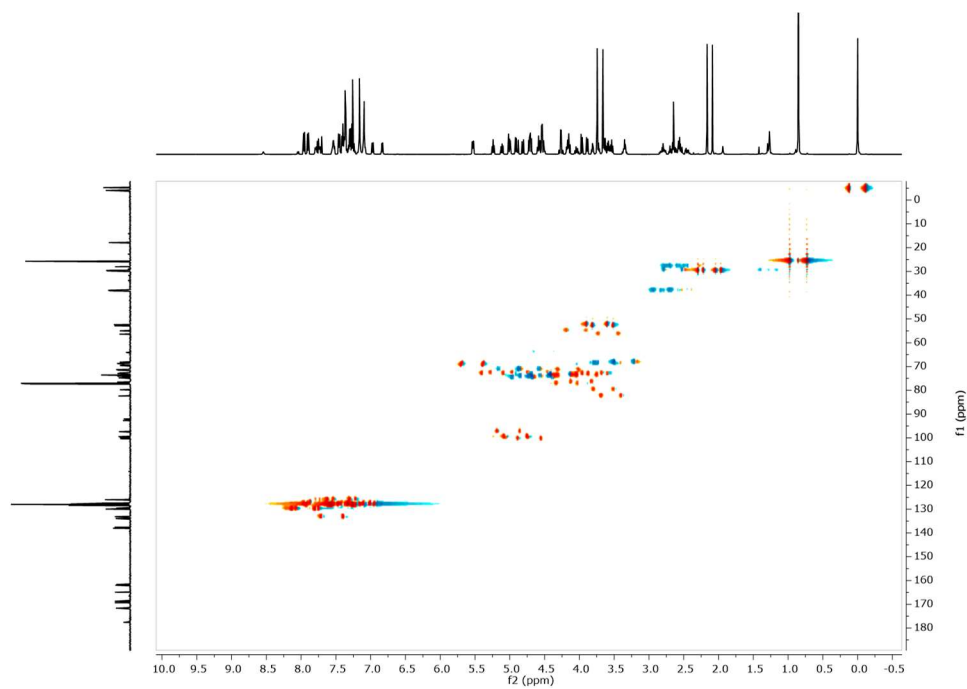



gCOSY (CDCl<sub>3</sub>, 500 MHz) of **29**

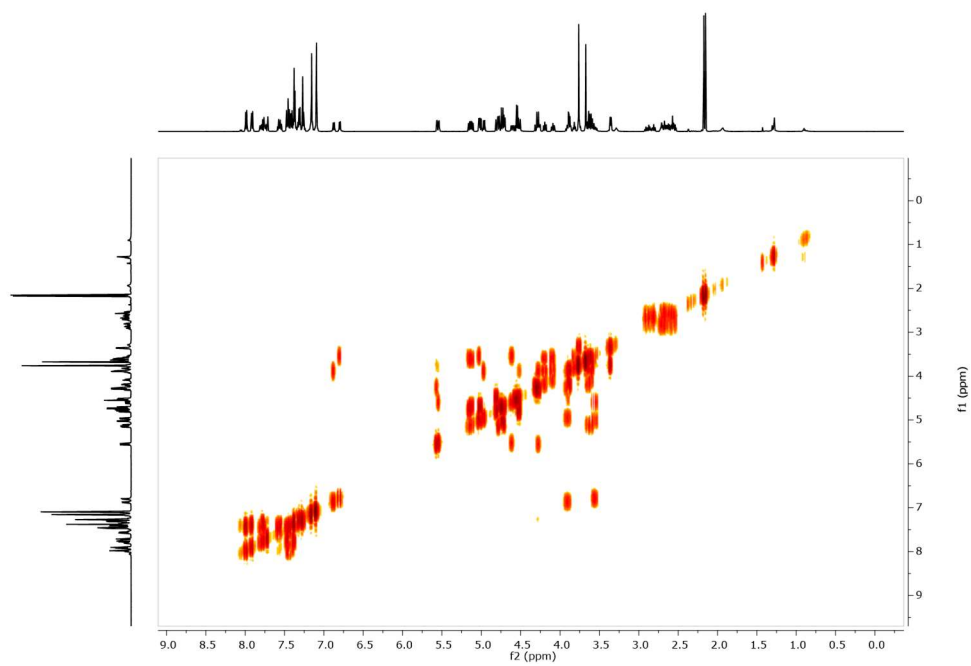



gCOSY (CDCl<sub>3</sub>, 500 MHz) of **30**

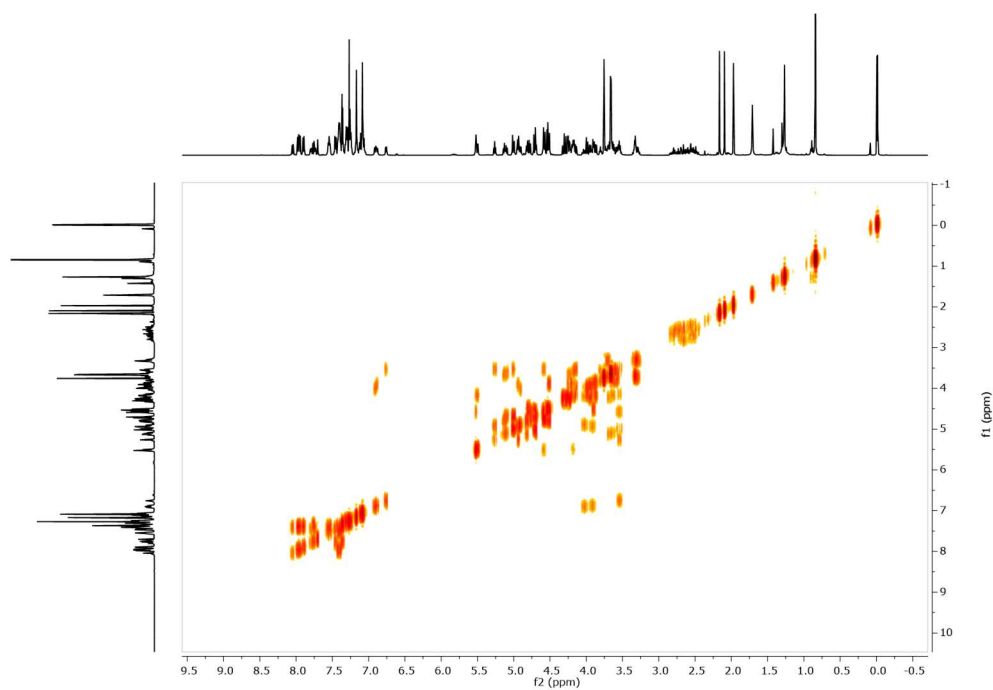

gHSQC (CDCl<sub>3</sub>, 500 MHz) of **30**

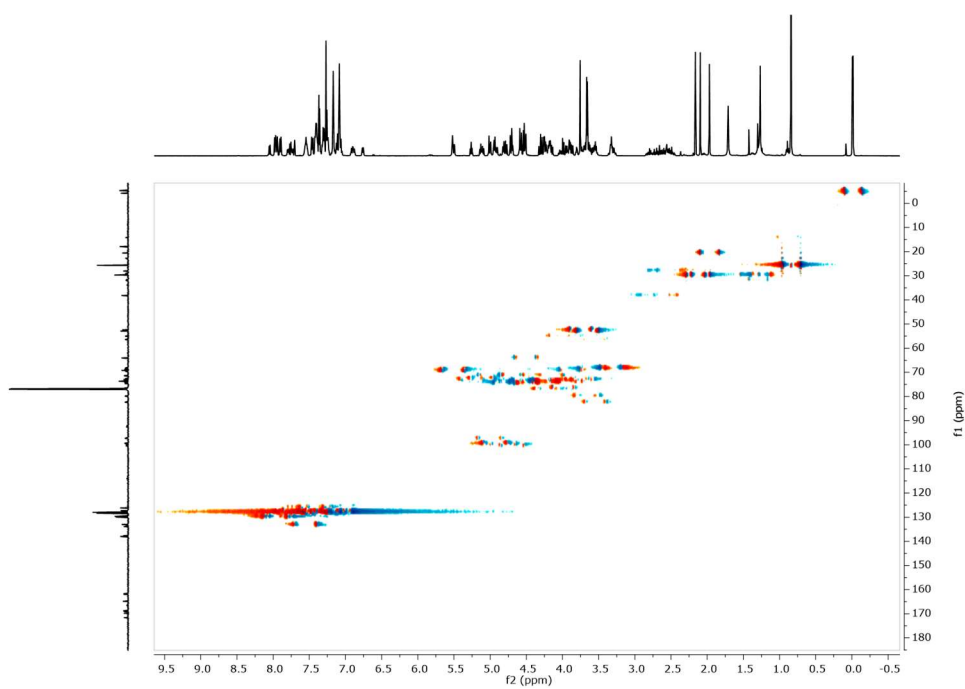



gCOSY (CDCl<sub>3</sub>, 500 MHz) of **31**

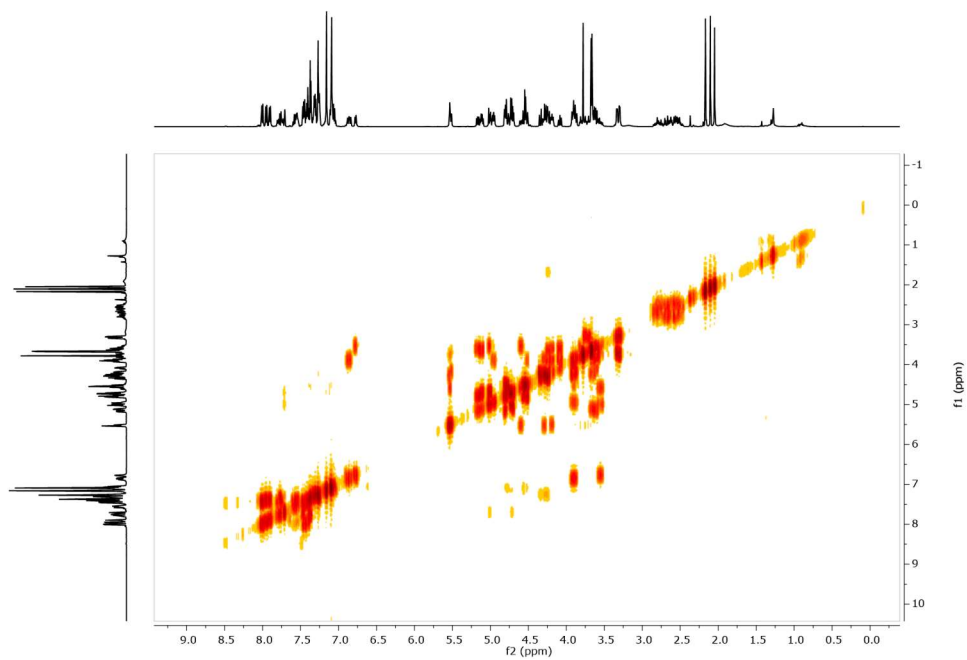

gHSQC (CDCl<sub>3</sub>, 500 MHz) of **31**

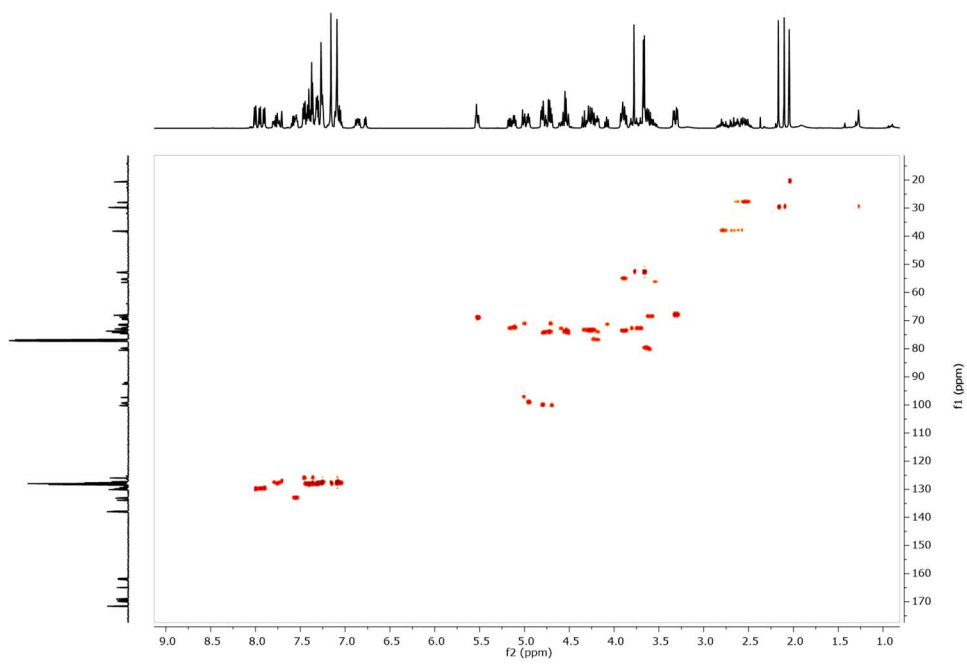

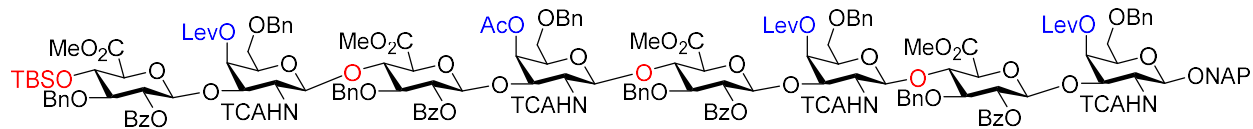

**32**

<sup>1</sup>H-NMR (CDCl<sub>3</sub>, 500 MHz) of **32**

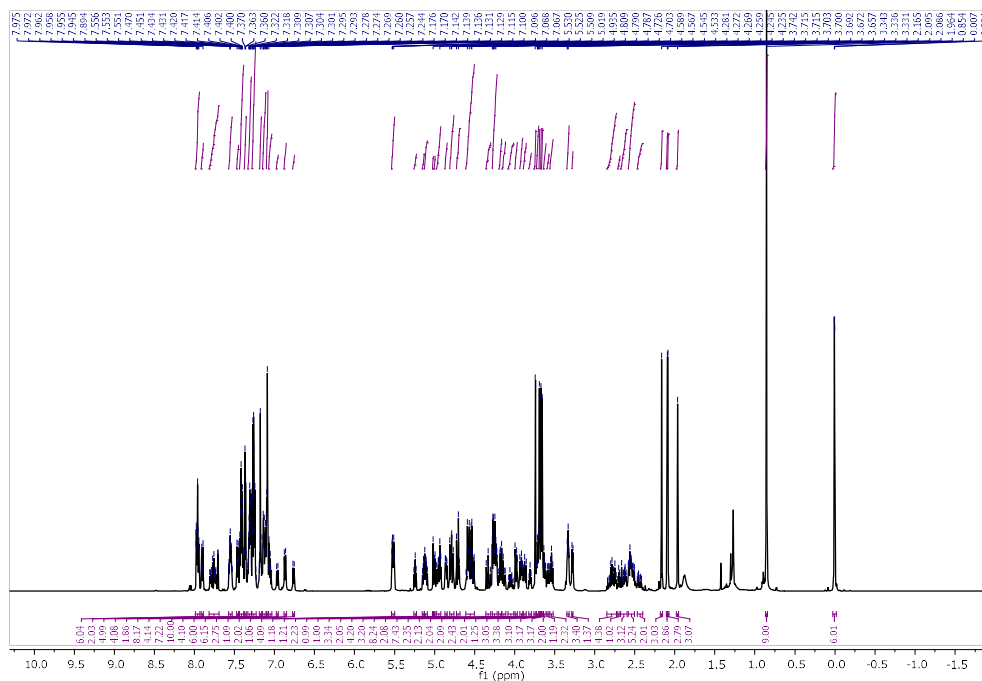

<sup>13</sup>C-NMR (CDCl<sub>3</sub>, 126 MHz) of **32**

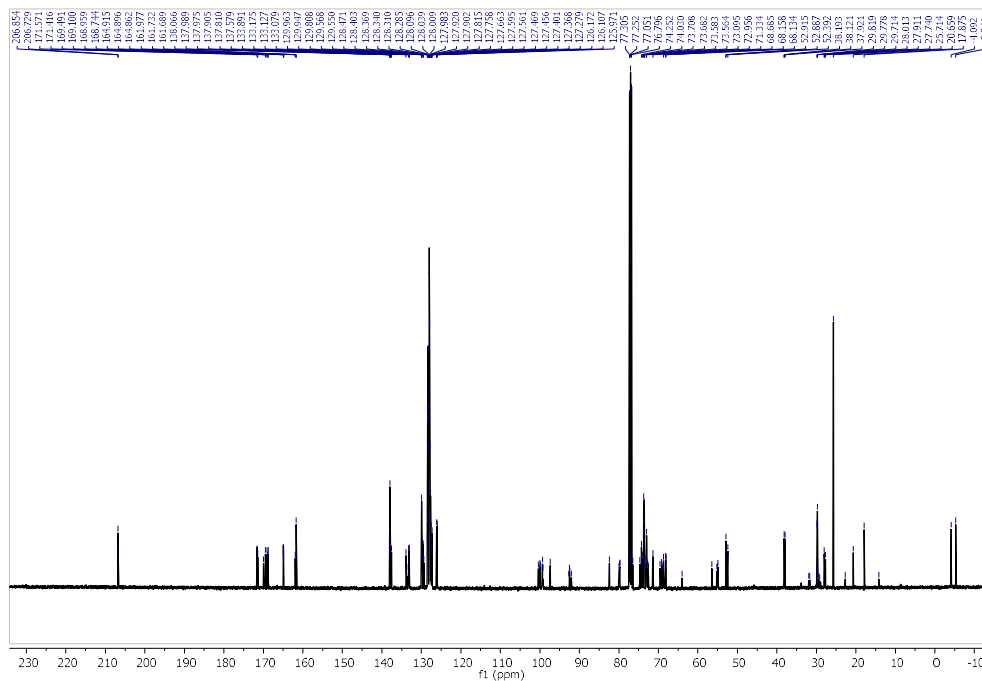



gCOSY (CDCl<sub>3</sub>, 500 MHz) of **32**

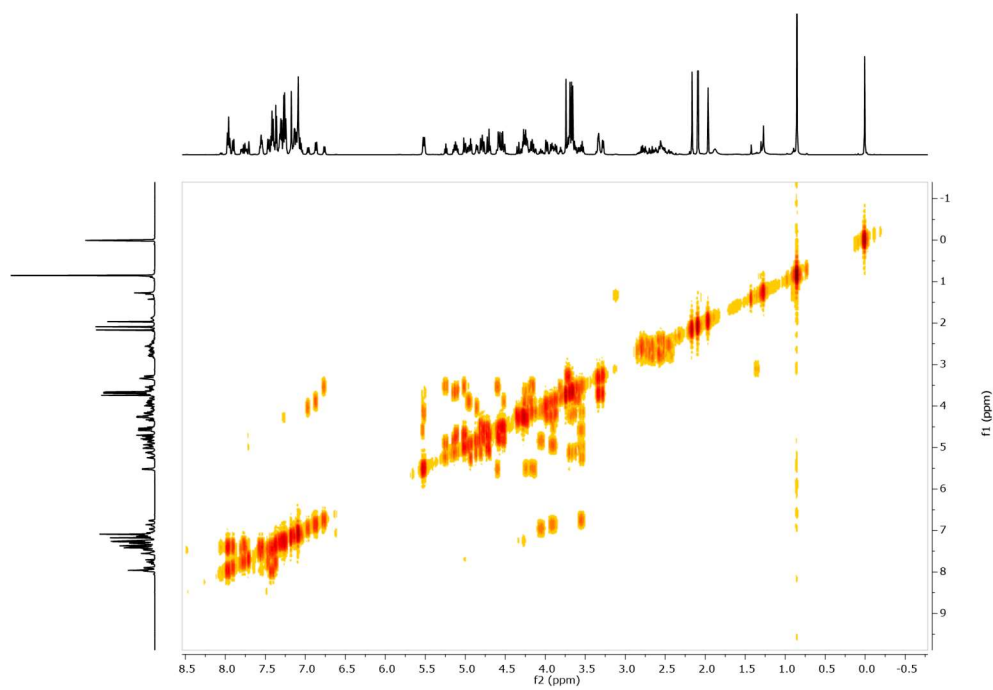

gHSQC (CDCl<sub>3</sub>, 500 MHz) of **32**

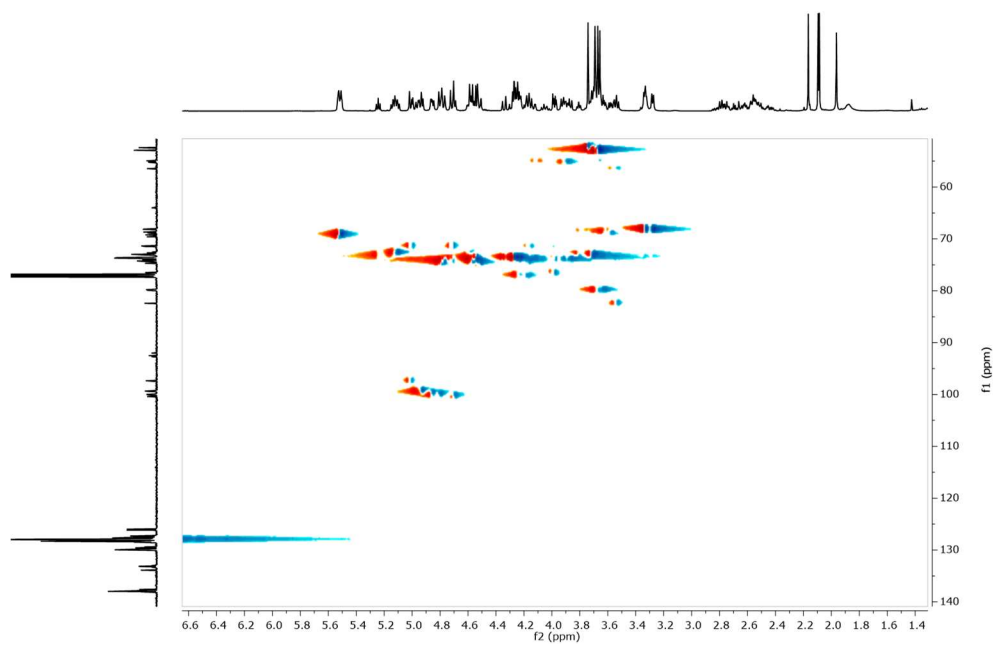

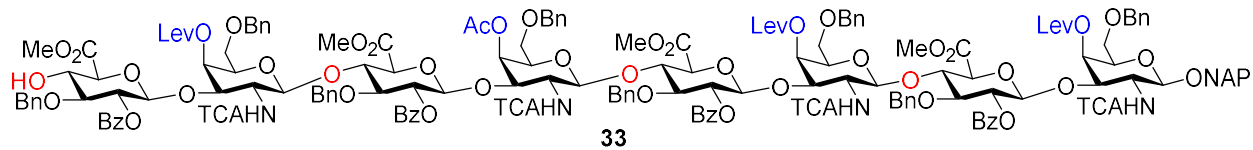

<sup>1</sup>H-NMR (CDCl<sub>3</sub>, 500 MHz) of **33**

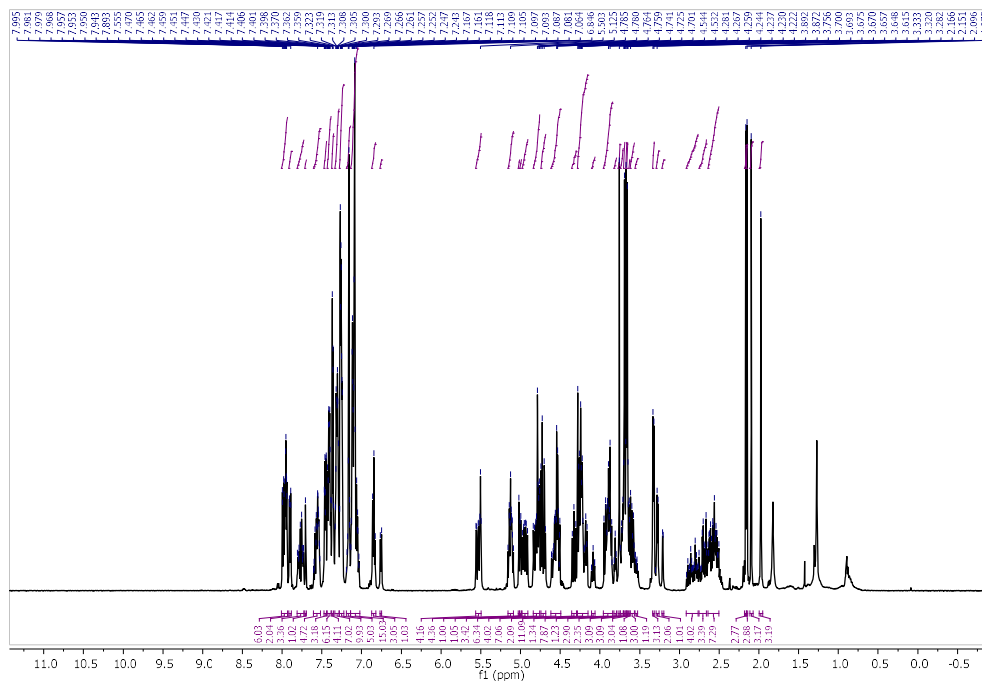

<sup>13</sup>C-NMR (CDCl<sub>3</sub>, 126 MHz) of **33**

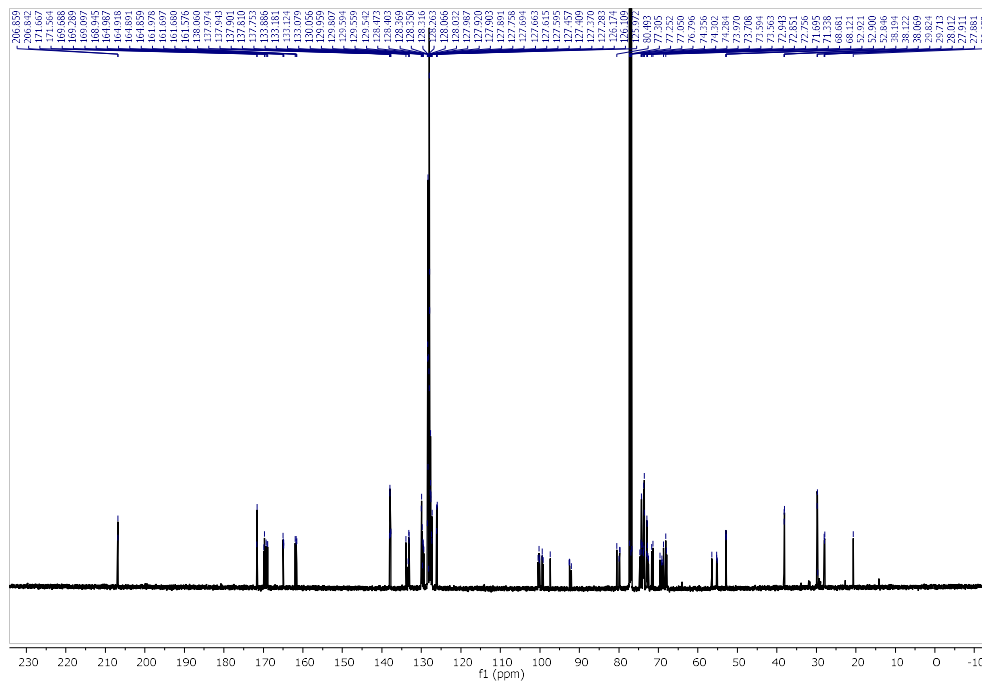

gCOSY (CDCl<sub>3</sub>, 500 MHz) of **33**

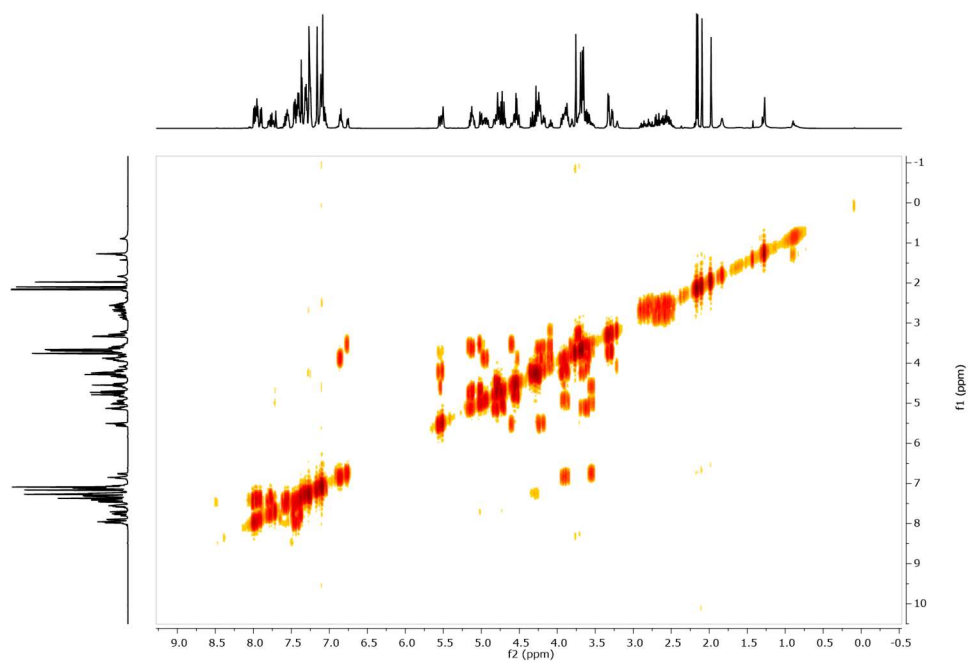

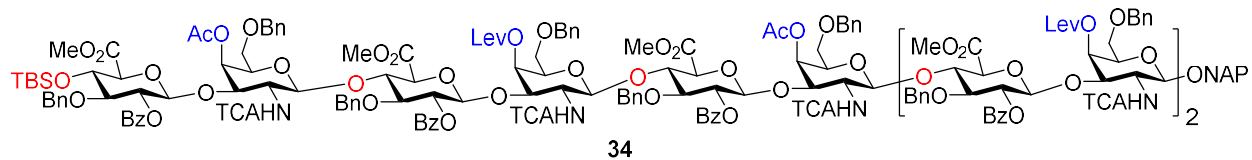

<sup>1</sup>H-NMR (CDCl<sub>3</sub>, 500 MHz) of **34**

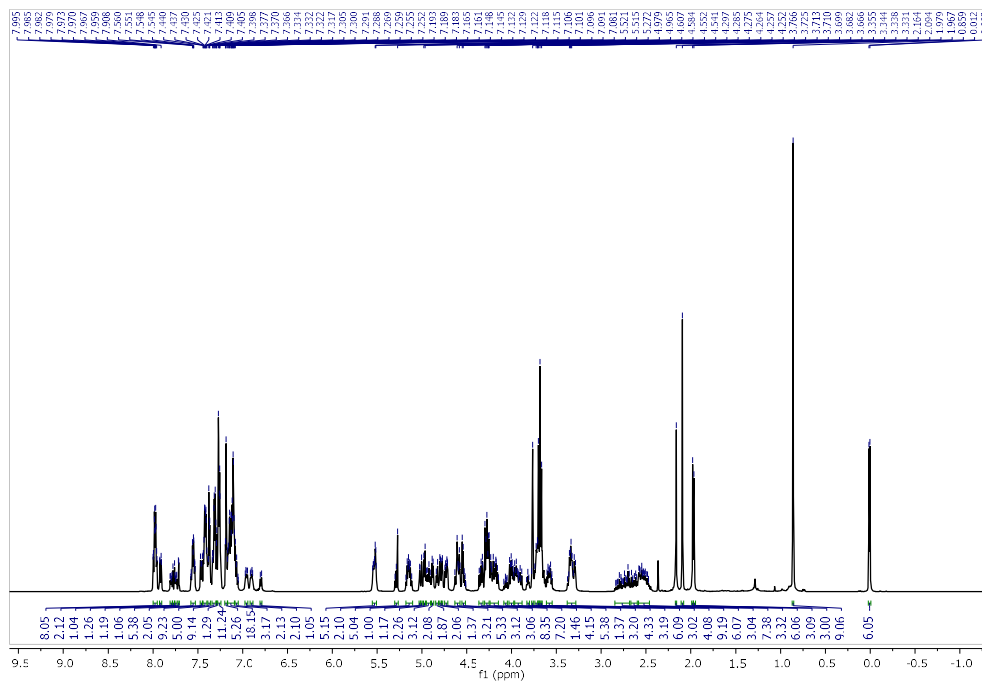

<sup>13</sup>C-NMR (CDCl<sub>3</sub>, 126 MHz) of **34**

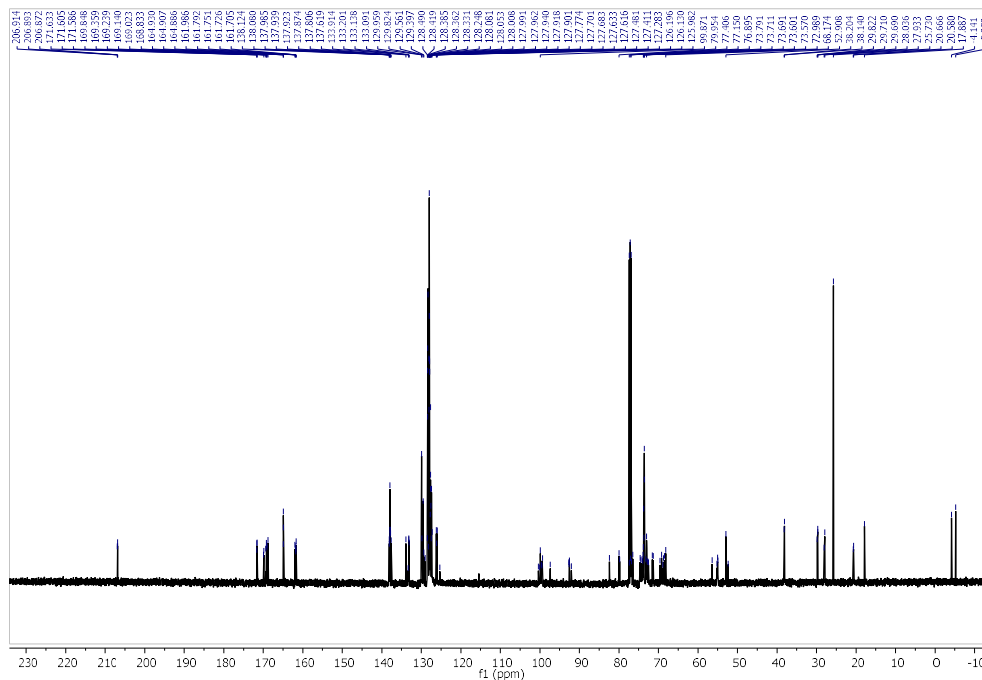

gCOSY (CDCl<sub>3</sub>, 500 MHz) of **34**

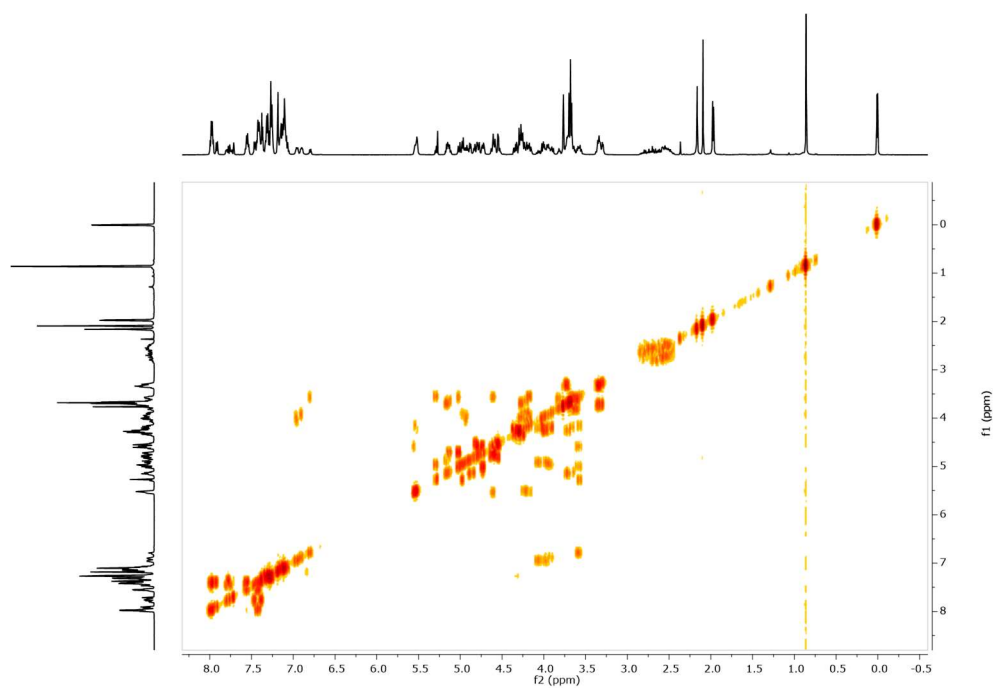

gHSQC (CDCl<sub>3</sub>, 500 MHz) of **34**

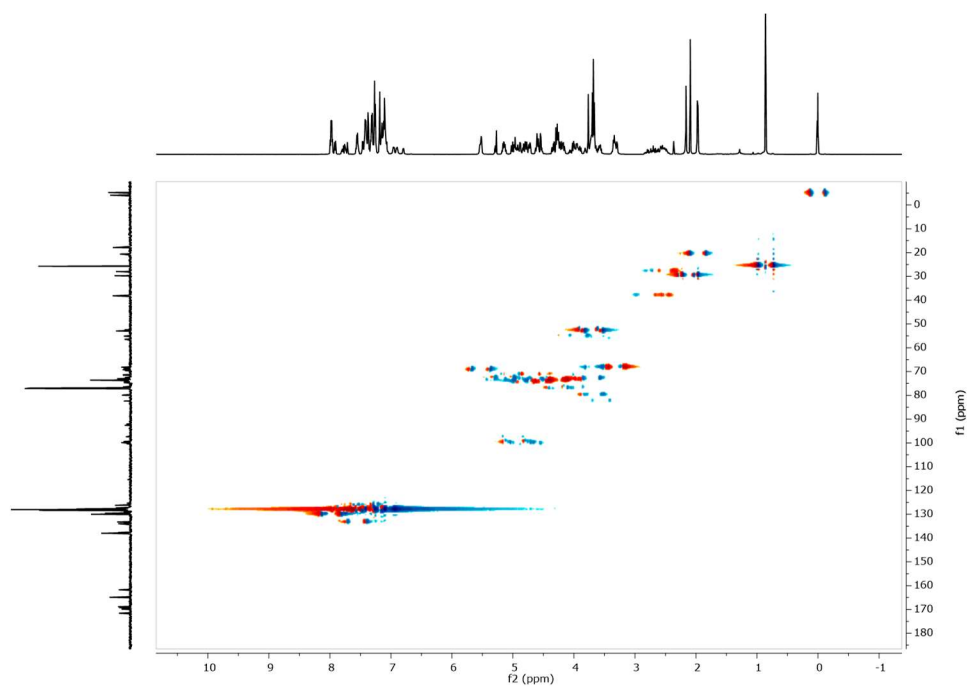

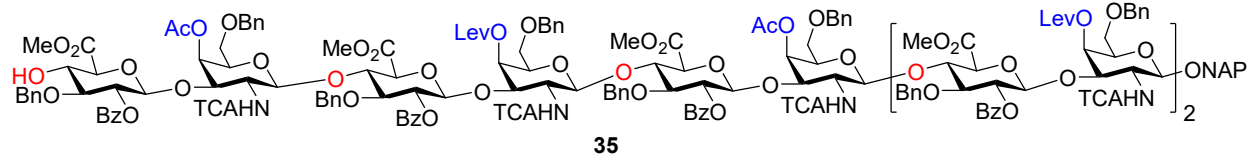

<sup>1</sup>H-NMR (CDCl<sub>3</sub>, 500 MHz) of **35**

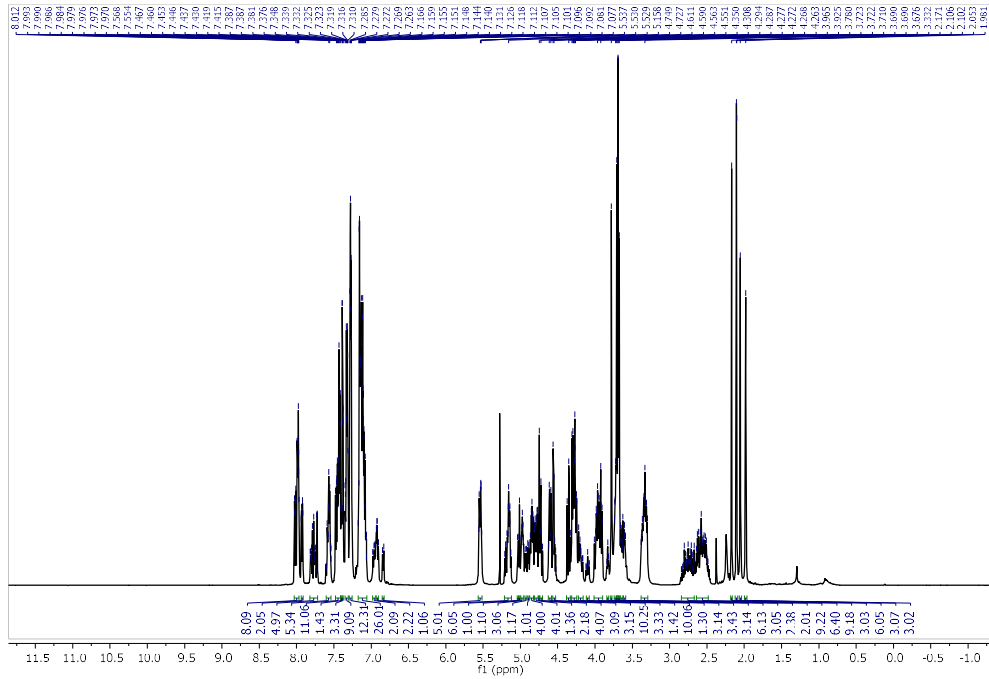

gCOSY (CDCl<sub>3</sub>, 500 MHz) of **35**

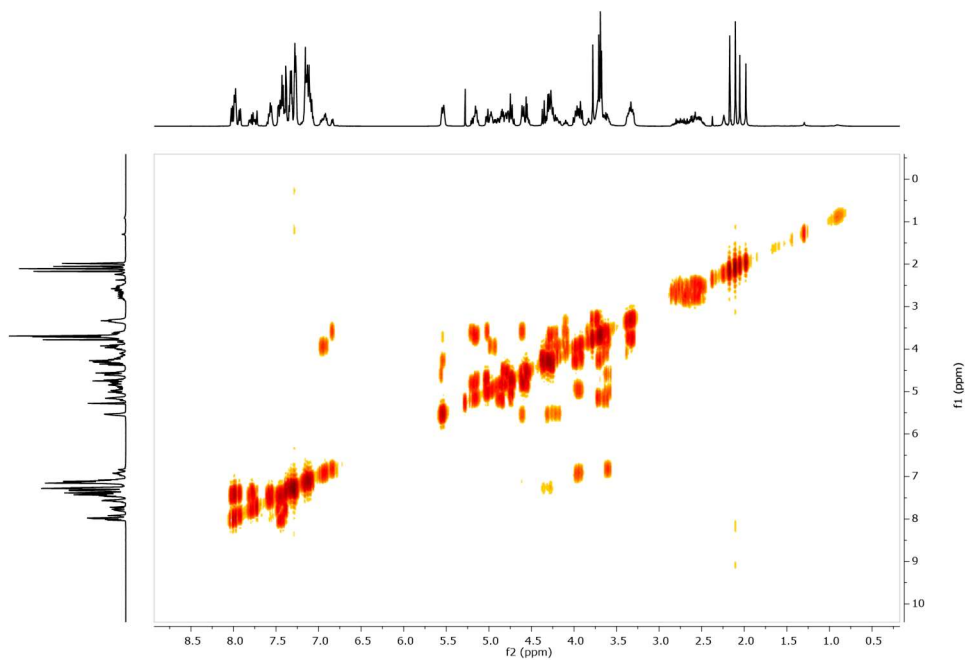

gHSQC (CDCl<sub>3</sub>, 500 MHz) of **35**

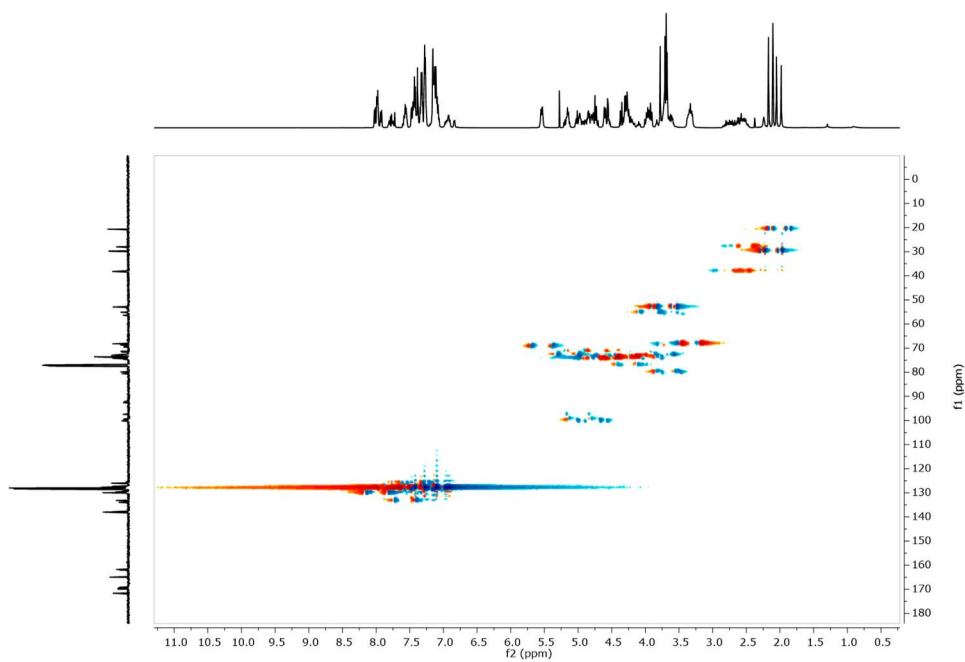





gCOSY (CDCl<sub>3</sub>, 500 MHz) of **36**

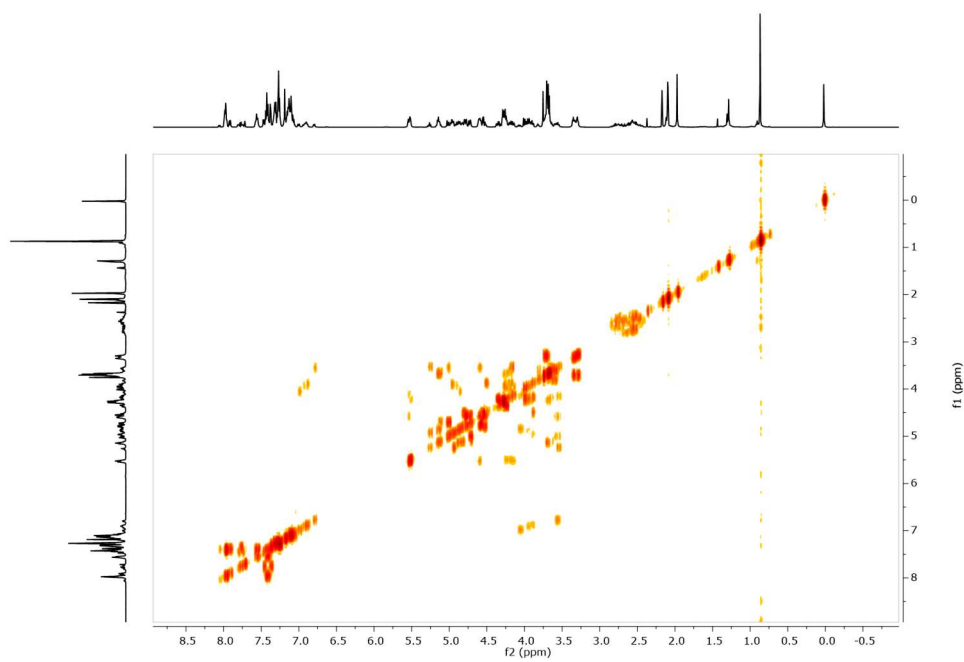

gHSQC (CDCl<sub>3</sub>, 500 MHz) of **36**

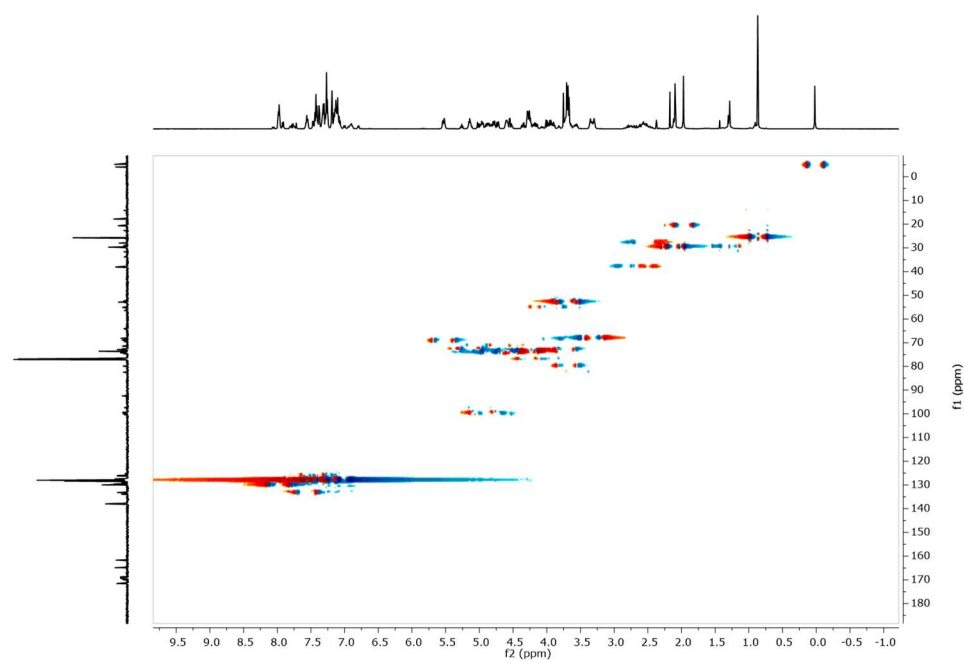

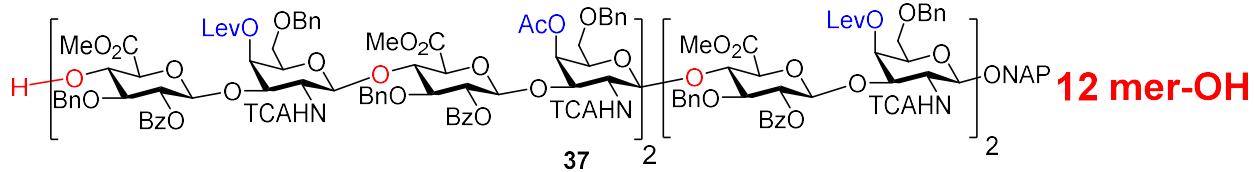

<sup>1</sup>H-NMR (CDCl<sub>3</sub>, 500 MHz) of **37**

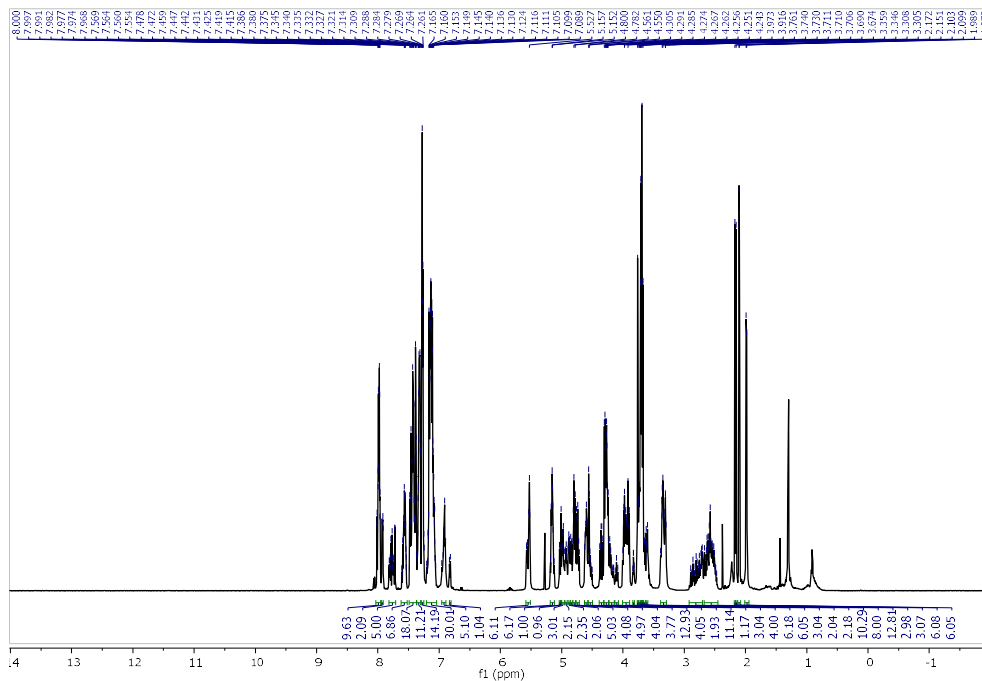

<sup>13</sup>C-NMR (CDCl<sub>3</sub>, 126 MHz) of **37**

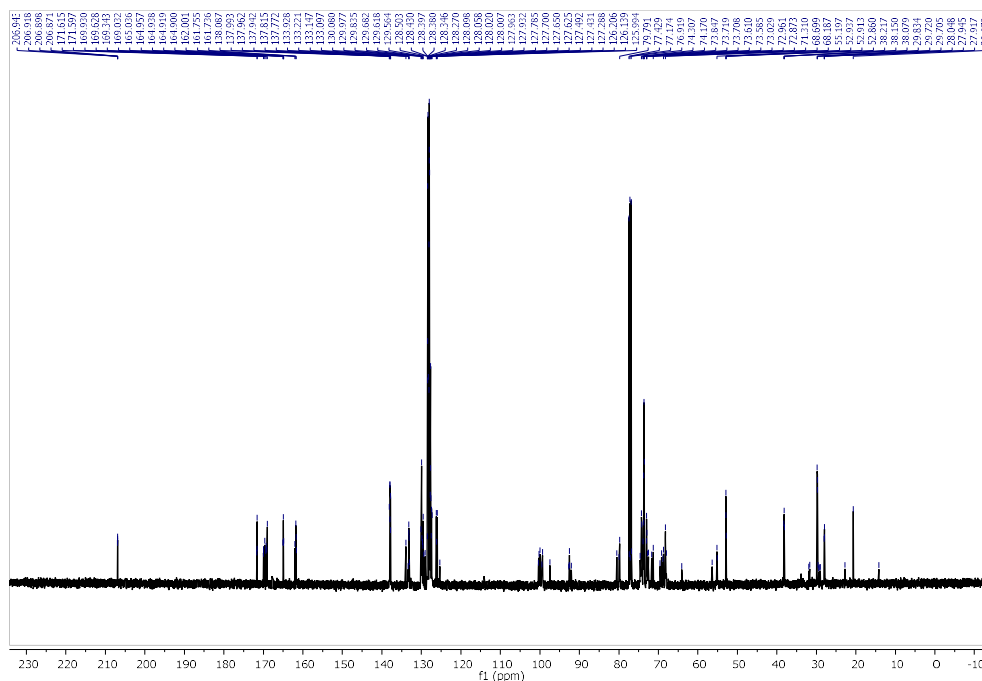

gCOSY (CDCl<sub>3</sub>, 500 MHz) of **37**

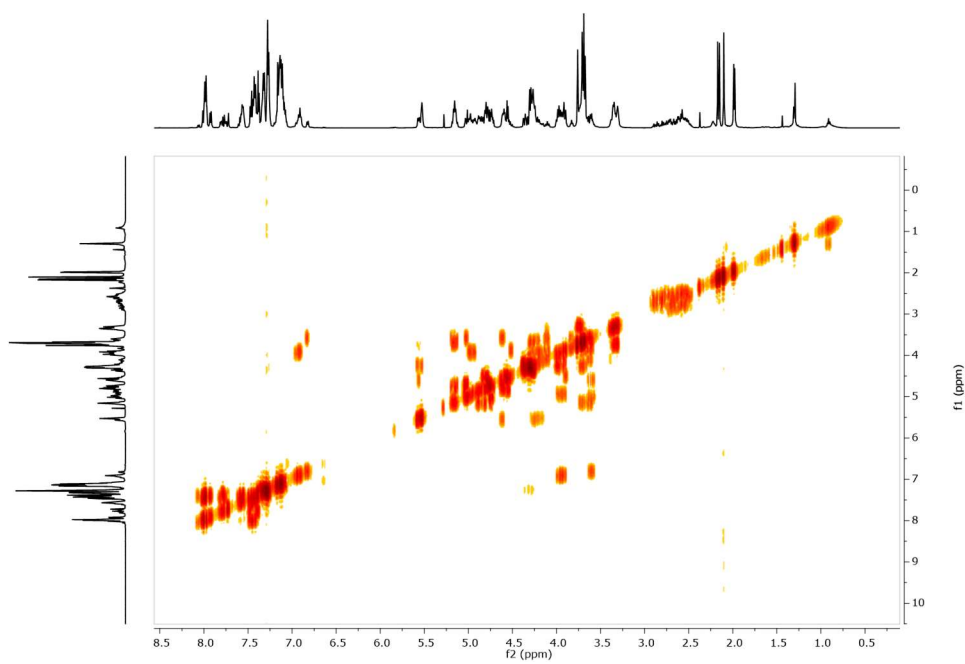

gHSQC (CDCl<sub>3</sub>, 500 MHz) of **37**

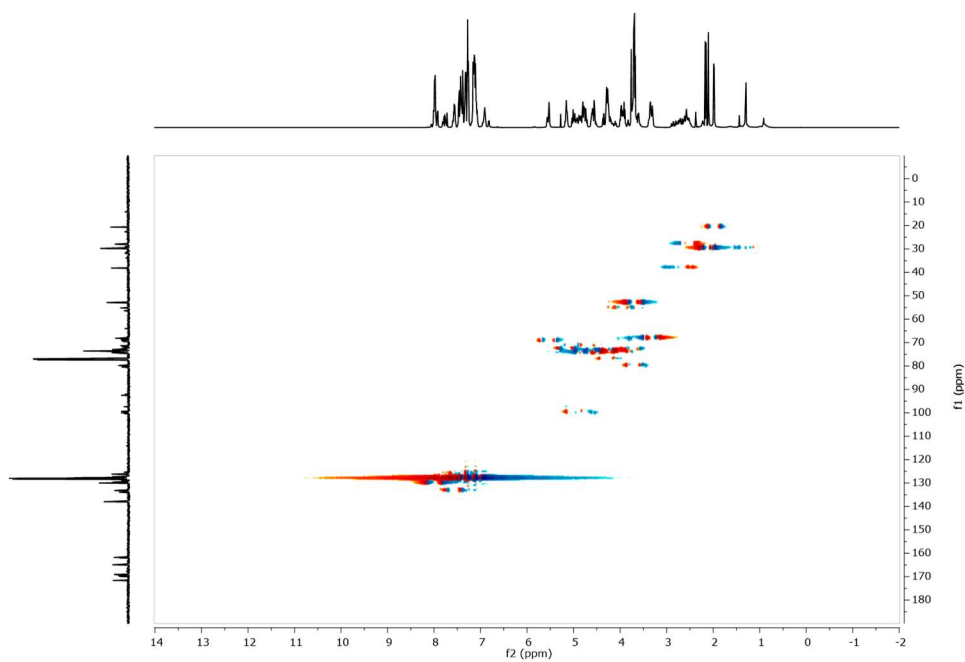

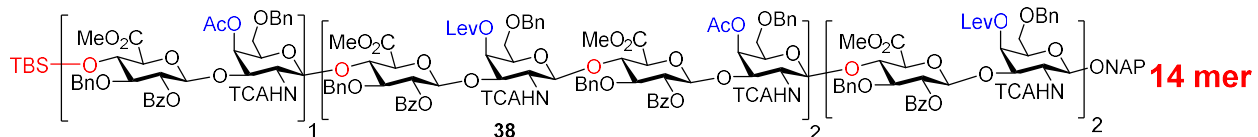

$^1\text{H-NMR}$  ( $\text{CDCl}_3$ , 500 MHz) of **38**

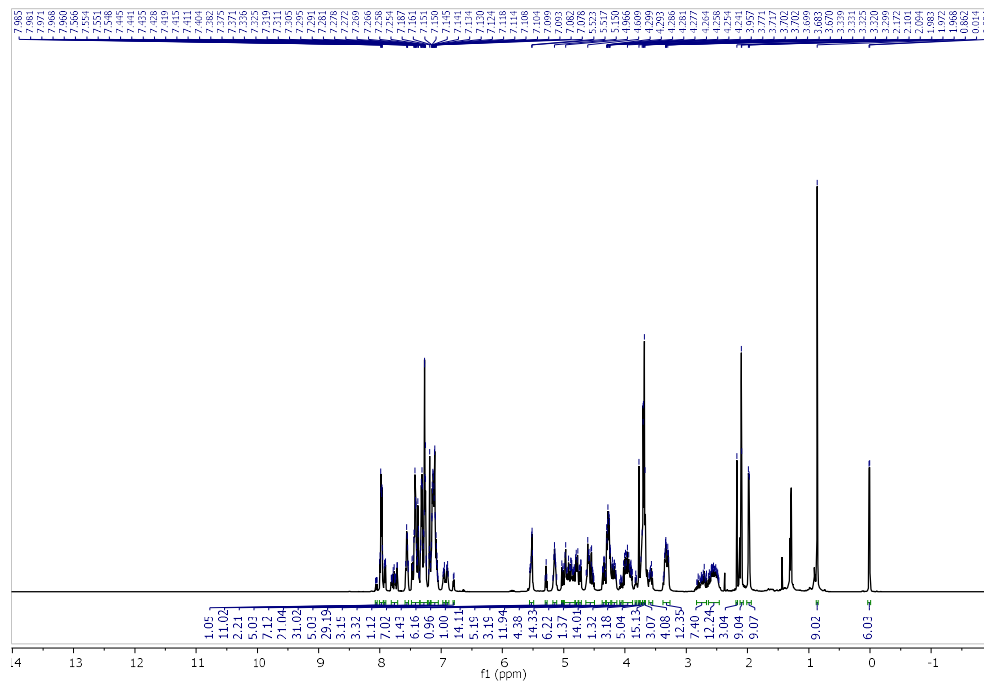

gCOSY (CDCl<sub>3</sub>, 500 MHz) of **38**

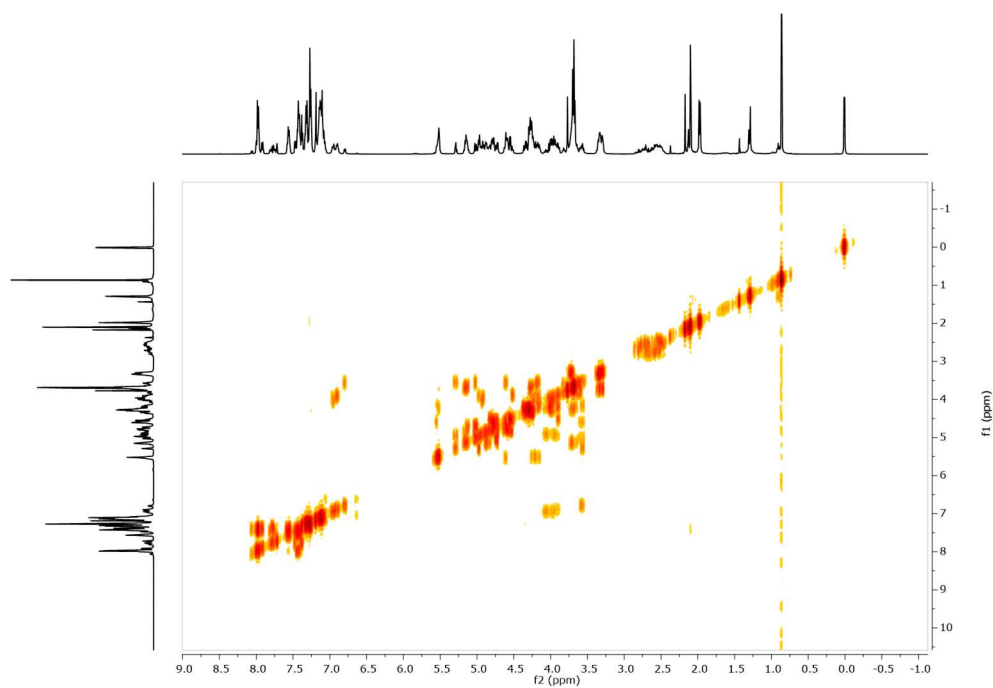

gHSQC (CDCl<sub>3</sub>, 500 MHz) of **38**

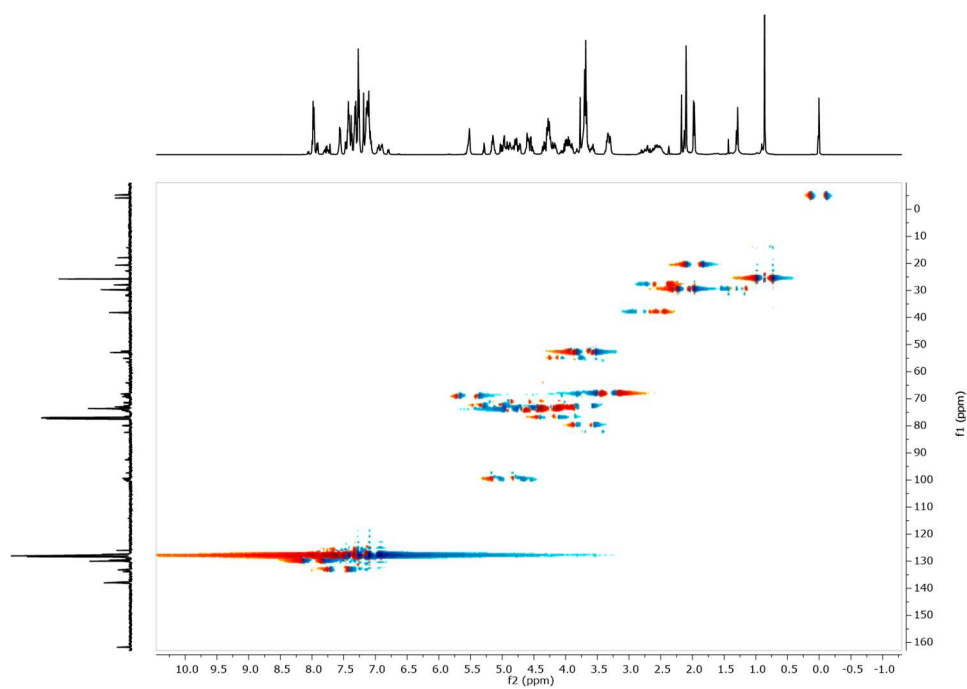

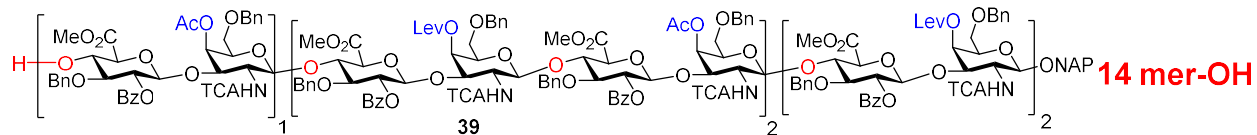

<sup>1</sup>H-NMR (CDCl<sub>3</sub>, 500 MHz) of **39**

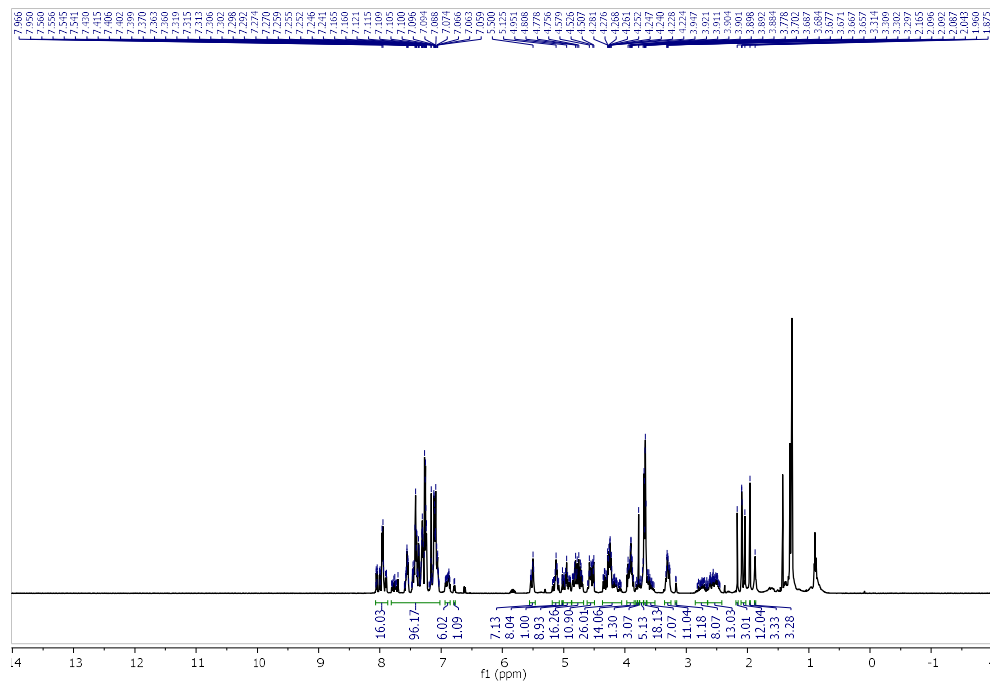

<sup>13</sup>C-NMR (CDCl<sub>3</sub>, 126 MHz) of **39**

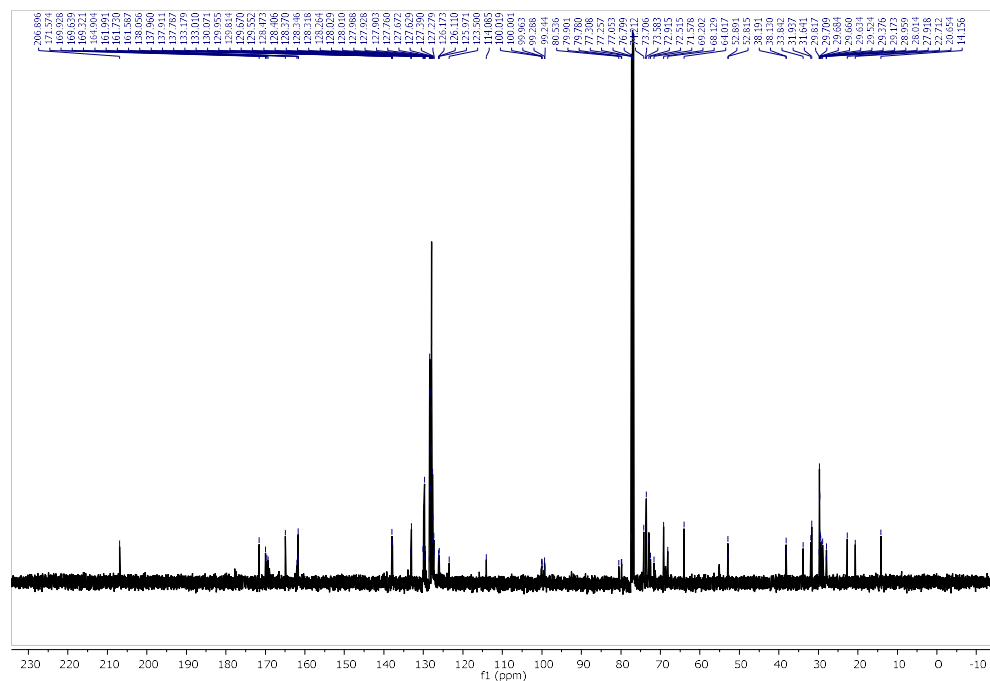

gCOSY (CDCl<sub>3</sub>, 500 MHz) of **39**

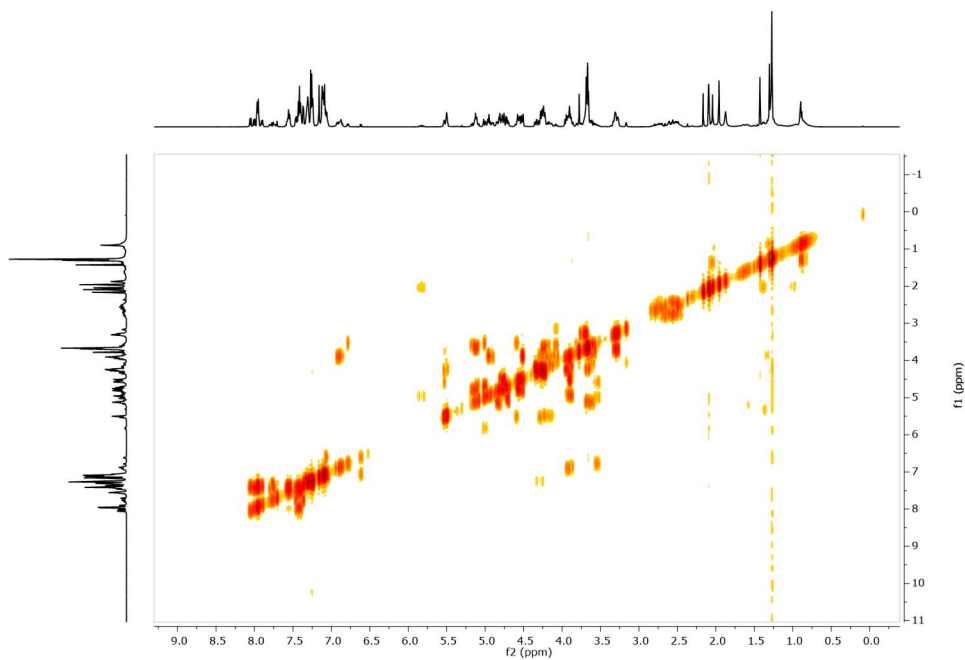

gHSQC (CDCl<sub>3</sub>, 500 MHz) of **39**

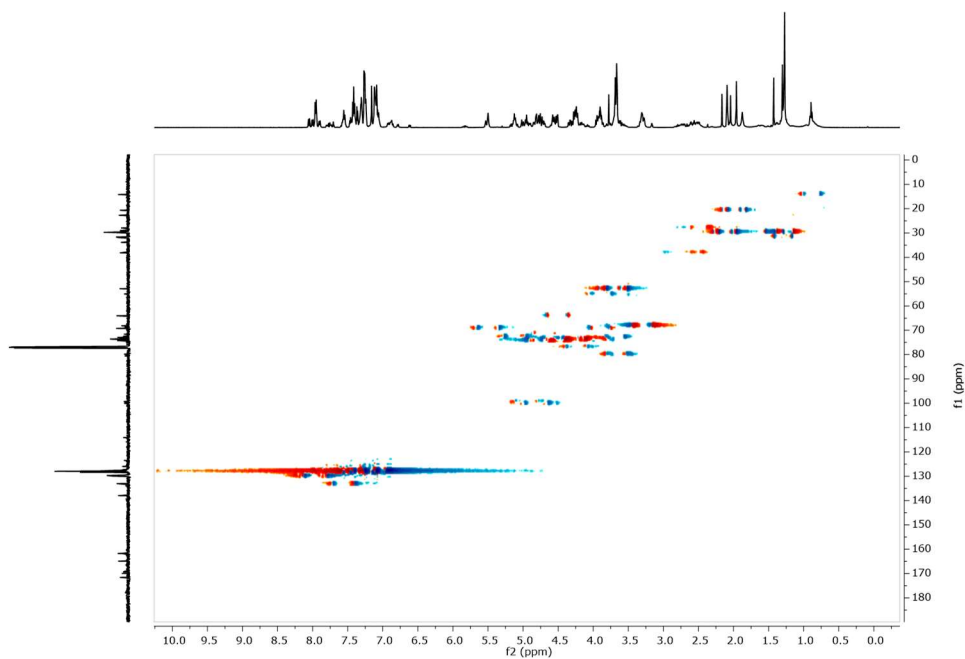

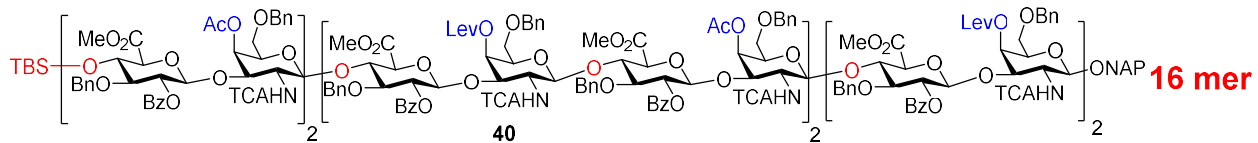

<sup>1</sup>H-NMR (CDCl<sub>3</sub>, 500 MHz) of **40**

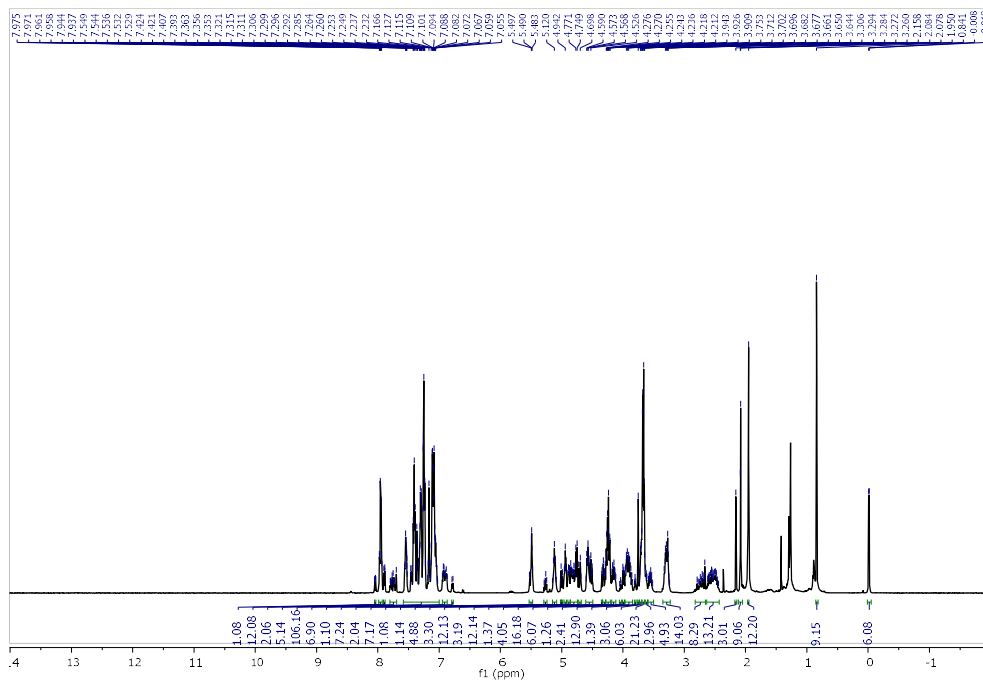

<sup>13</sup>C-NMR (CDCl<sub>3</sub>, 126 MHz) of **40**

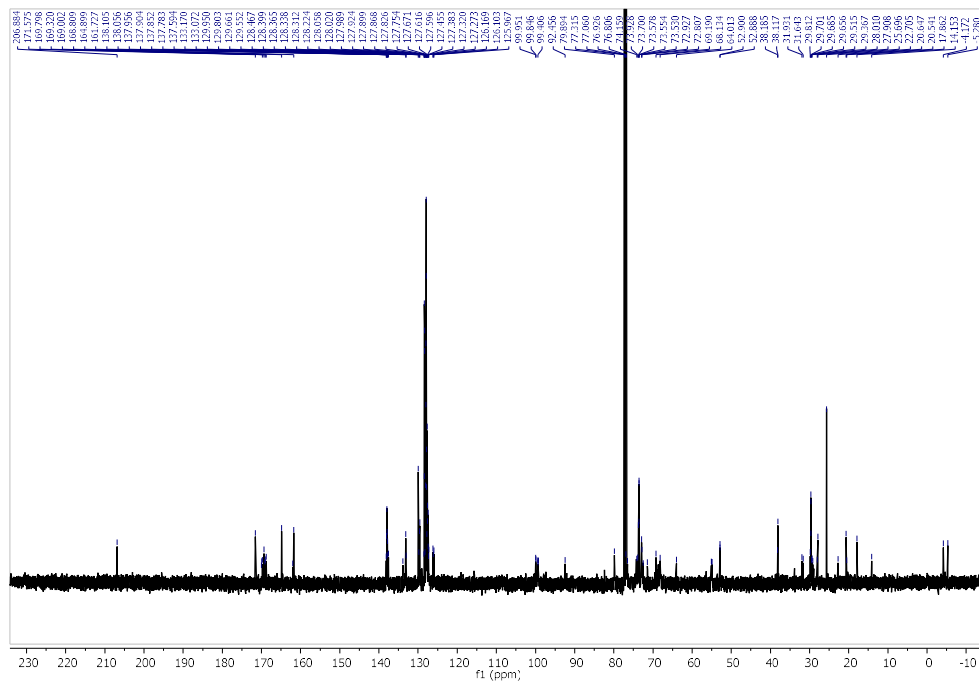



gCOSY (CDCl<sub>3</sub>, 500 MHz) of **40**

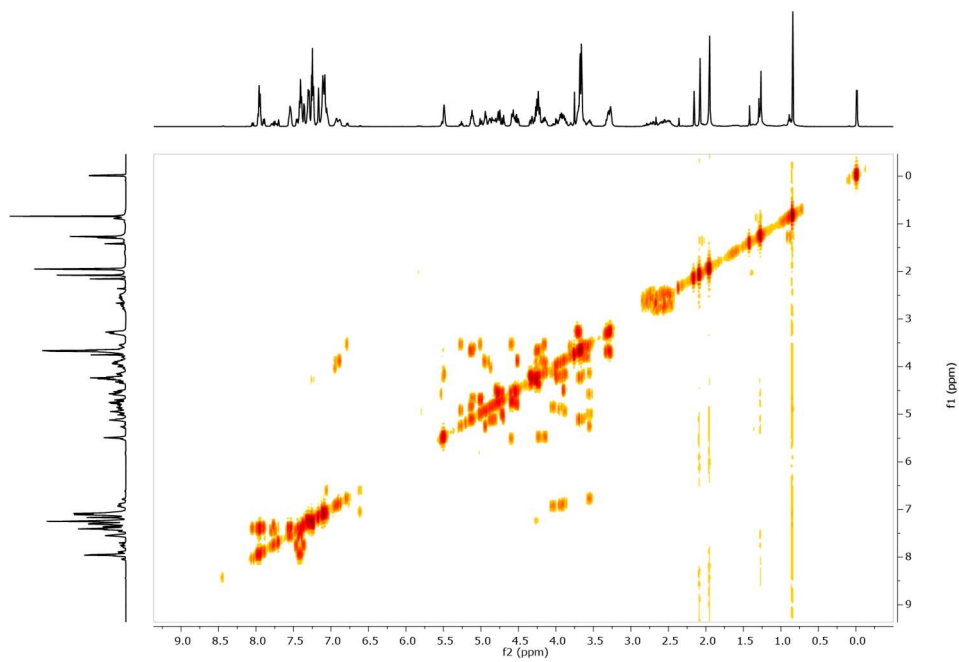

gHSQC (CDCl<sub>3</sub>, 500 MHz) of **40**

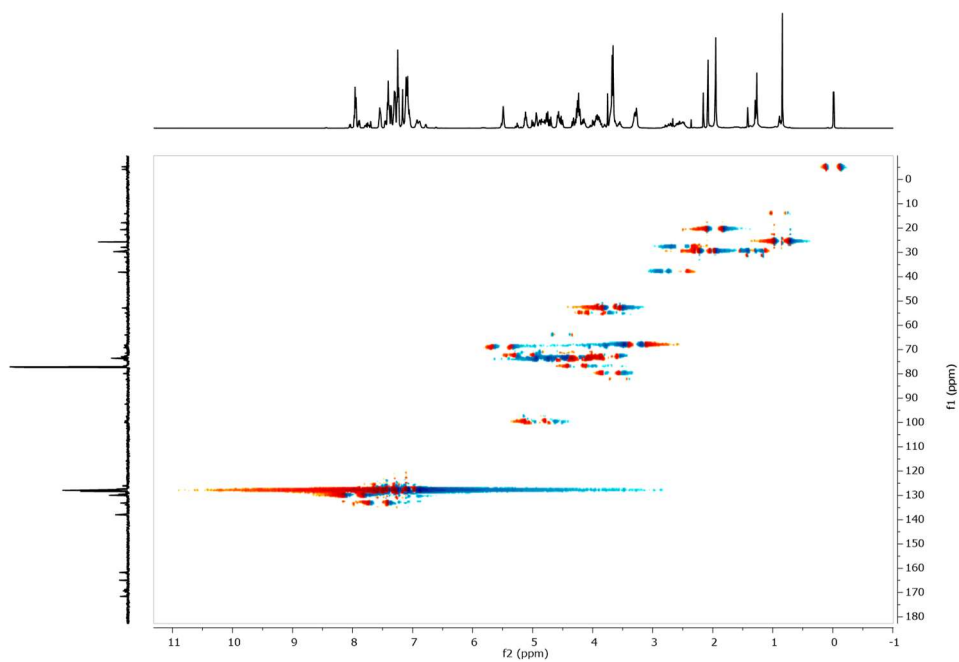

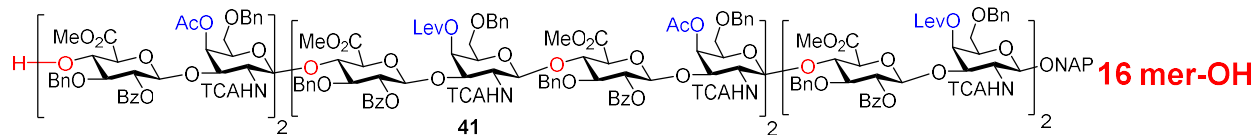

<sup>1</sup>H-NMR (CDCl<sub>3</sub>, 500 MHz) of 41

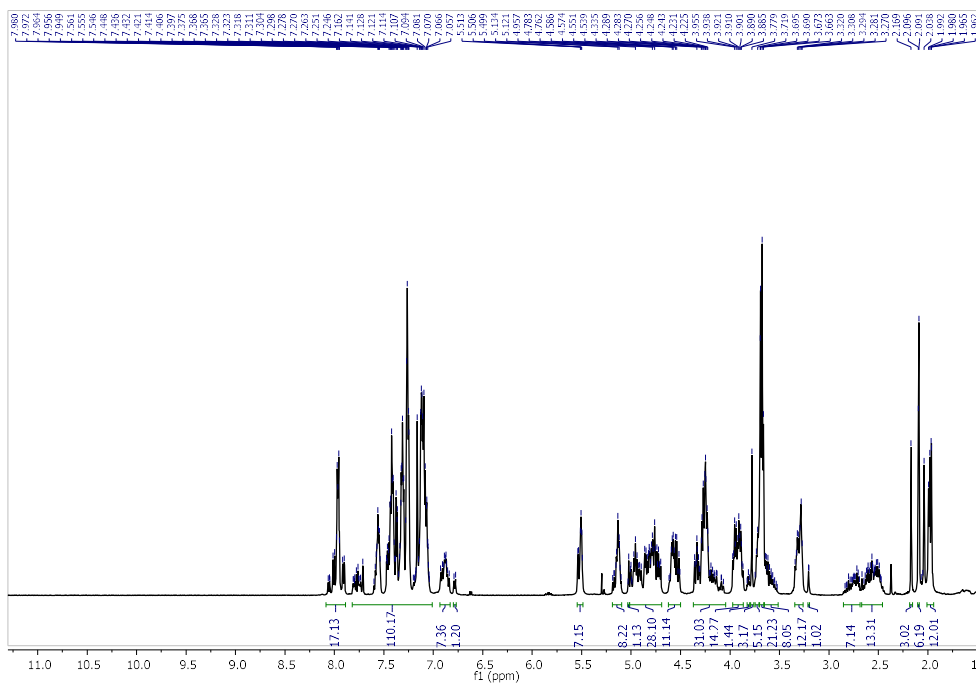

<sup>13</sup>C-NMR (CDCl<sub>3</sub>, 126 MHz) of 41

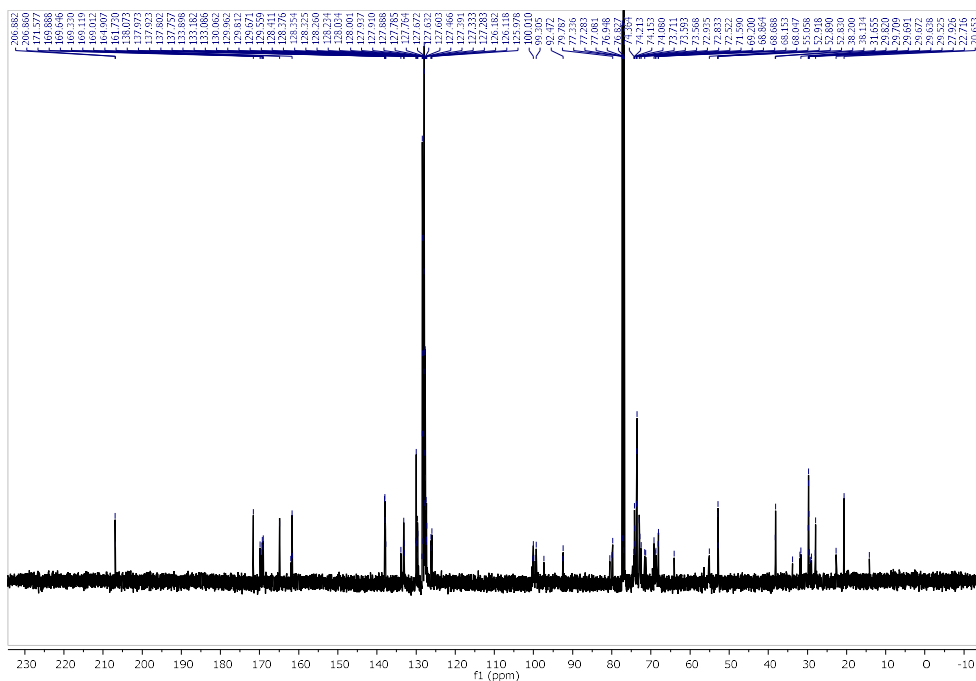

gCOSY (CDCl<sub>3</sub>, 500 MHz) of **41**

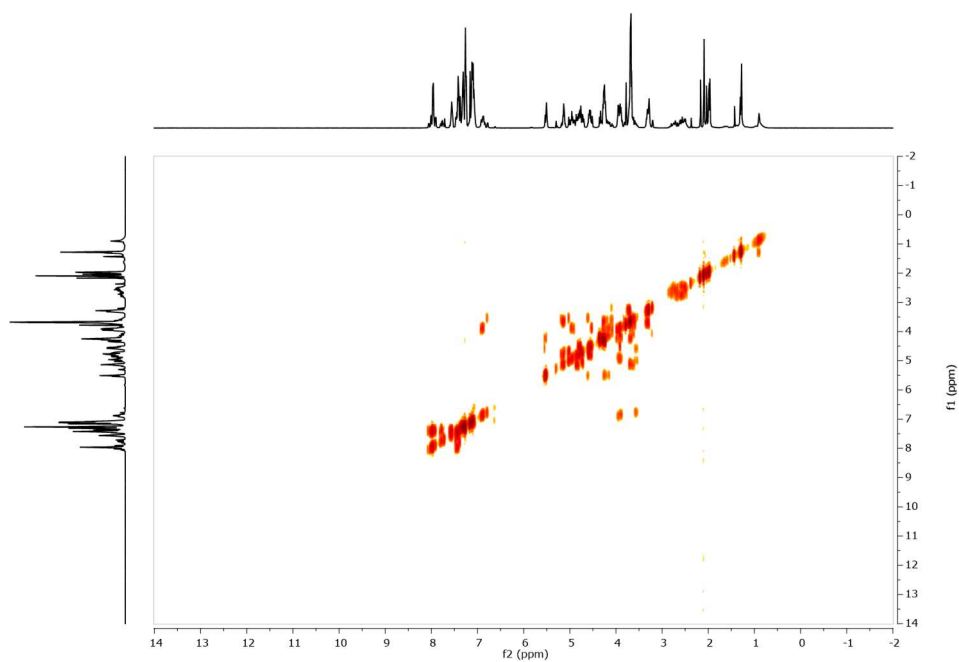

gHSQC (CDCl<sub>3</sub>, 500 MHz) of **41**

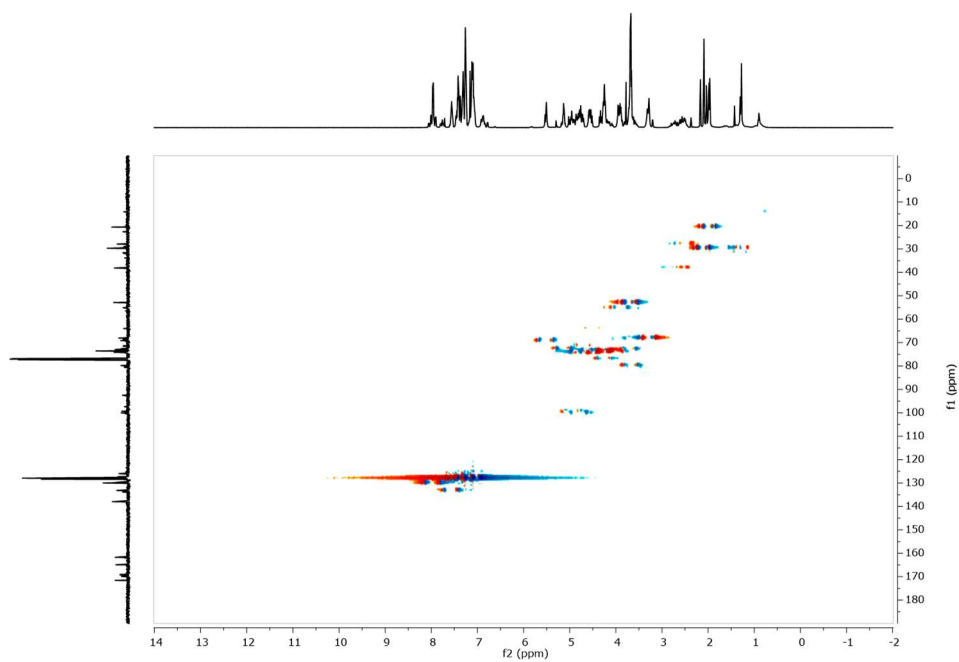



gCOSY (CDCl<sub>3</sub>, 500 MHz) of **42**

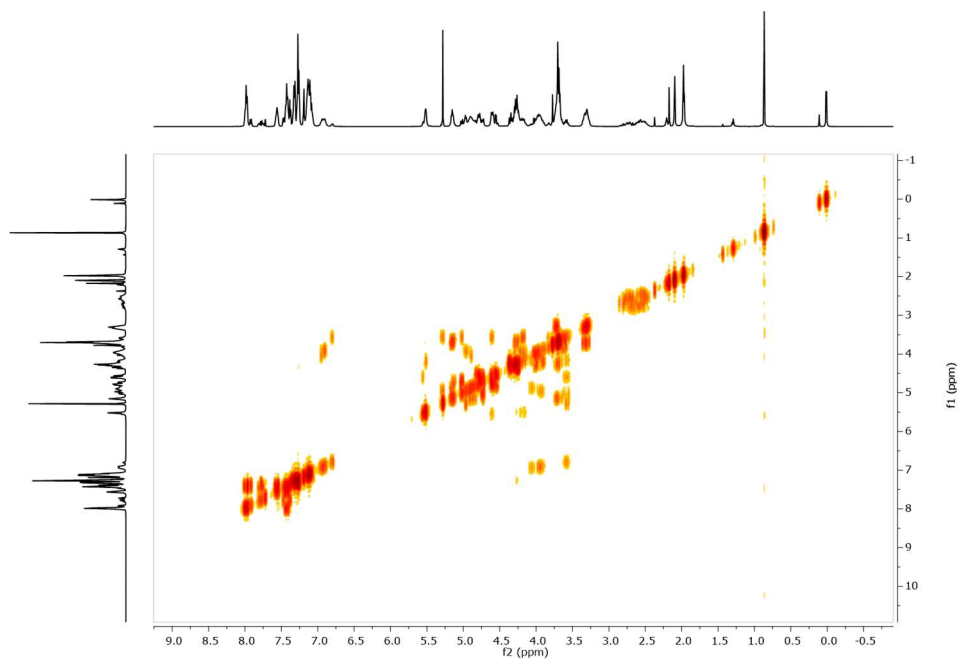

gHSQC (CDCl<sub>3</sub>, 500 MHz) of **42**

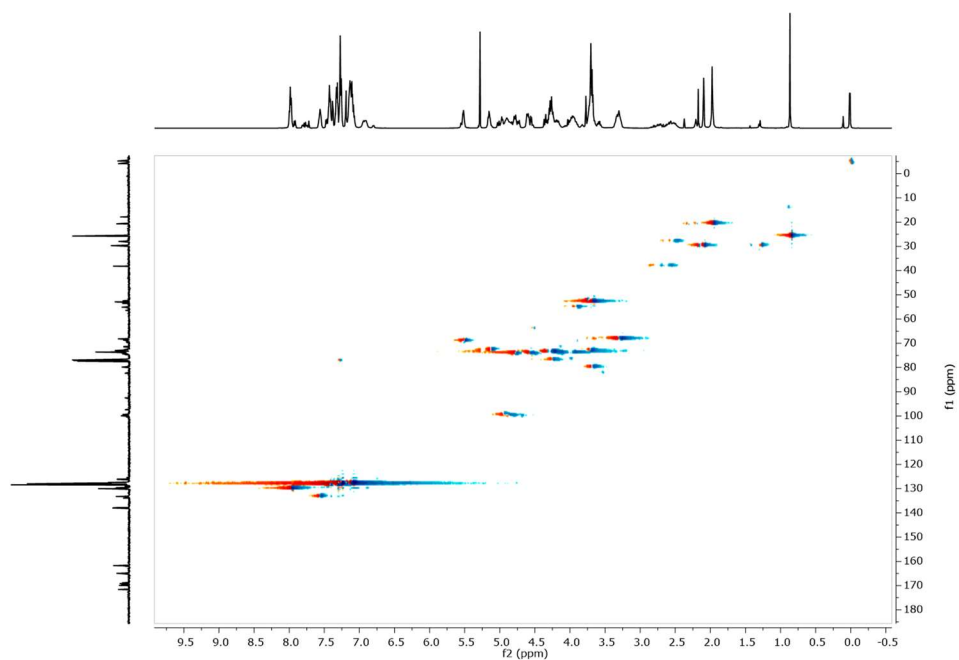

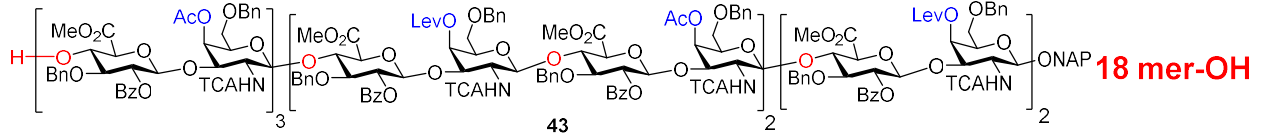

<sup>1</sup>H-NMR (CDCl<sub>3</sub>, 500 MHz) of **43**

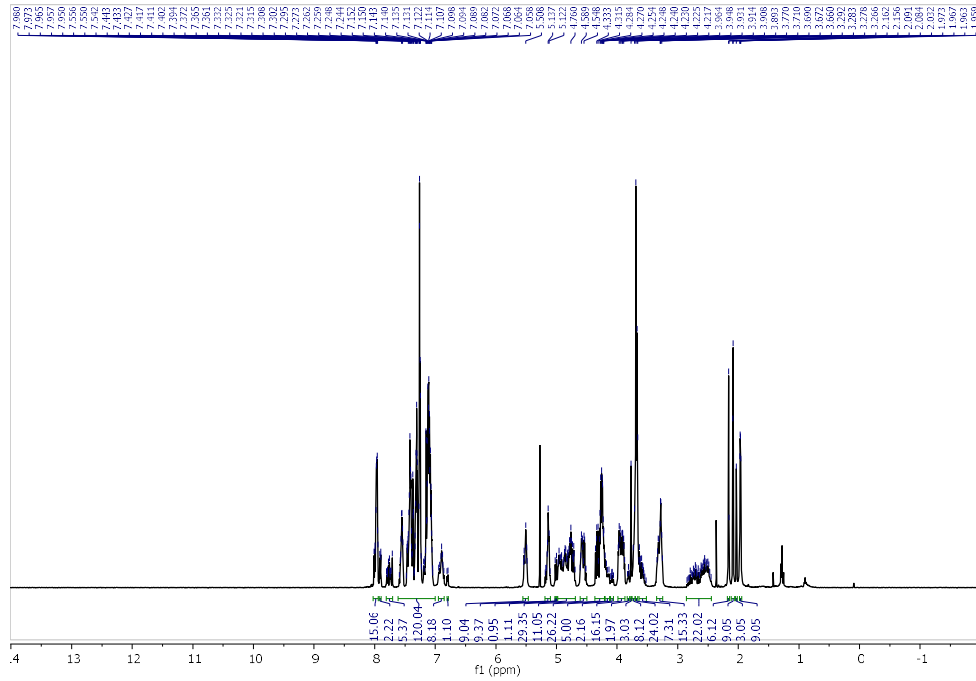

<sup>13</sup>C-NMR (CDCl<sub>3</sub>, 126 MHz) of **43**

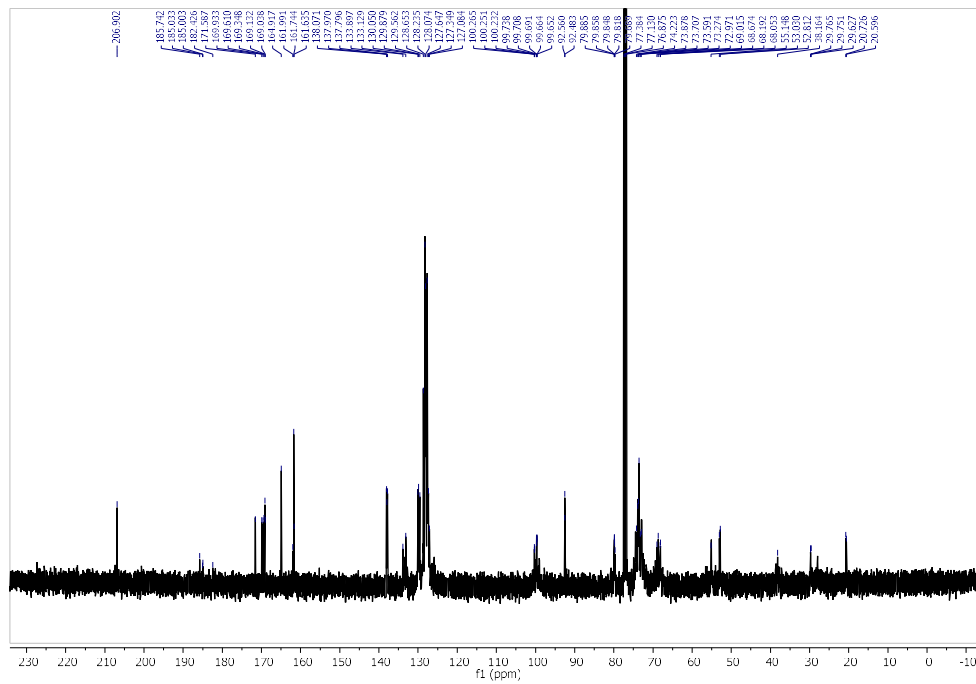

gCOSY (CDCl<sub>3</sub>, 500 MHz) of **43**

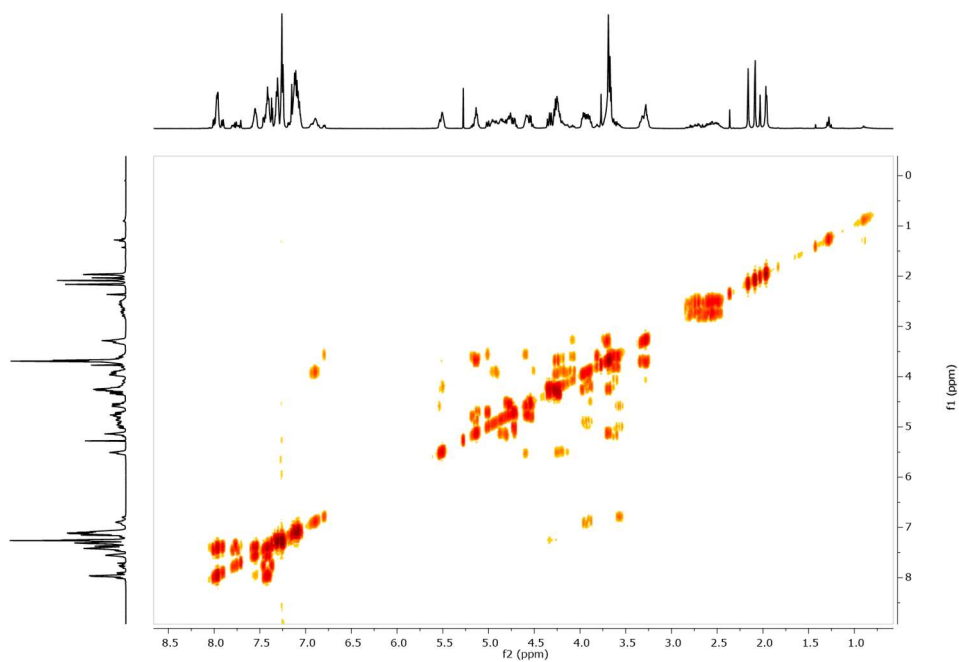

gHSQC (CDCl<sub>3</sub>, 500 MHz) of **43**

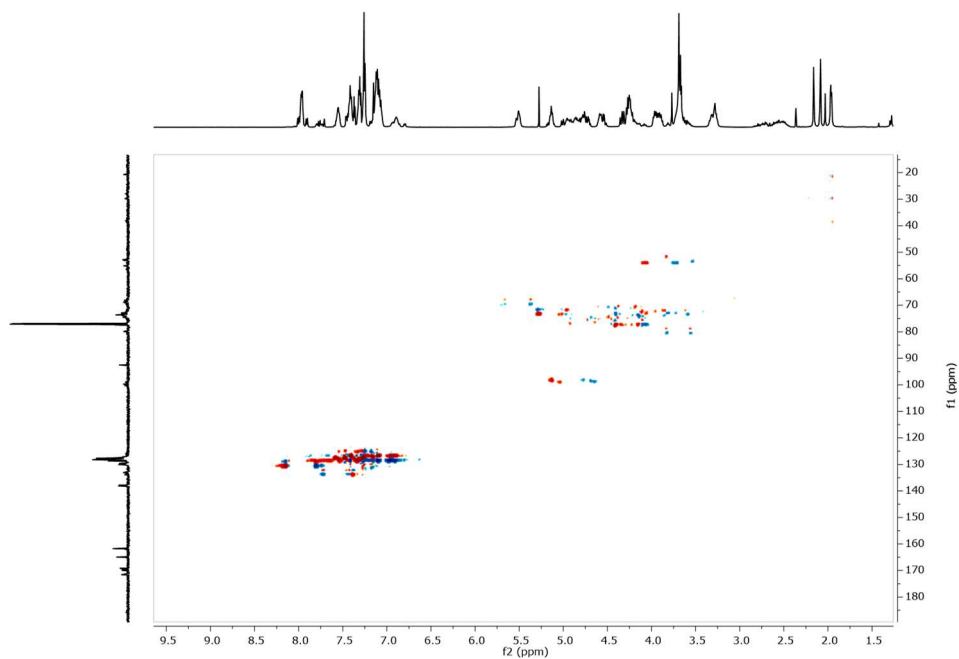

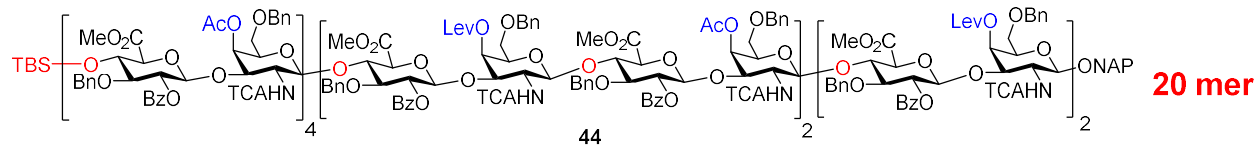

$^1\text{H-NMR}$  ( $\text{CDCl}_3$ , 500 MHz) of 44

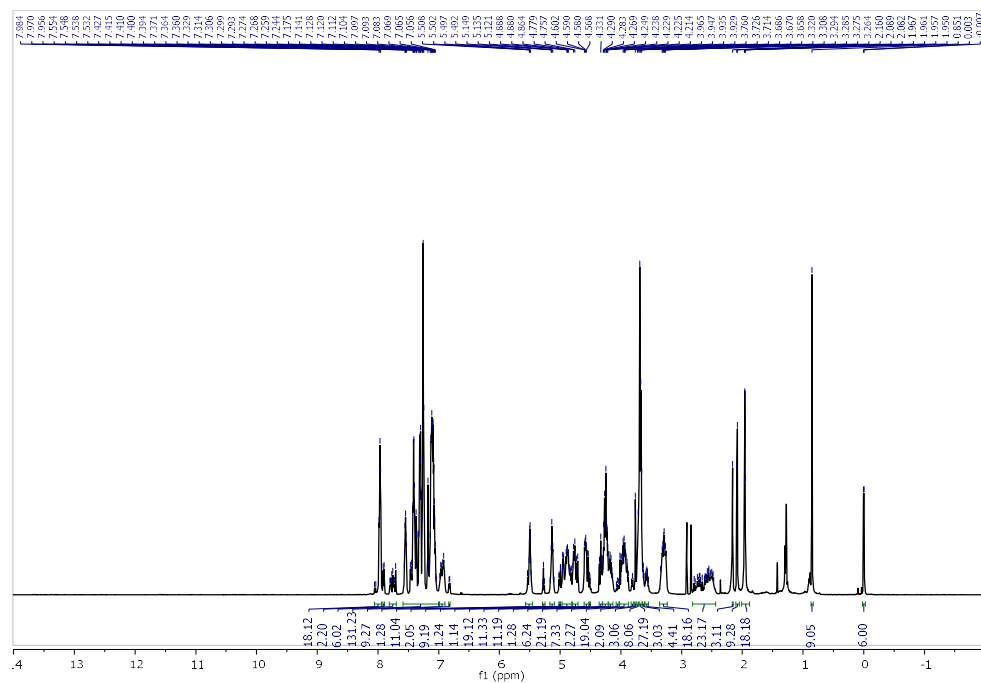

$^{13}\text{C-NMR}$  ( $\text{CDCl}_3$ , 126 MHz) of 44

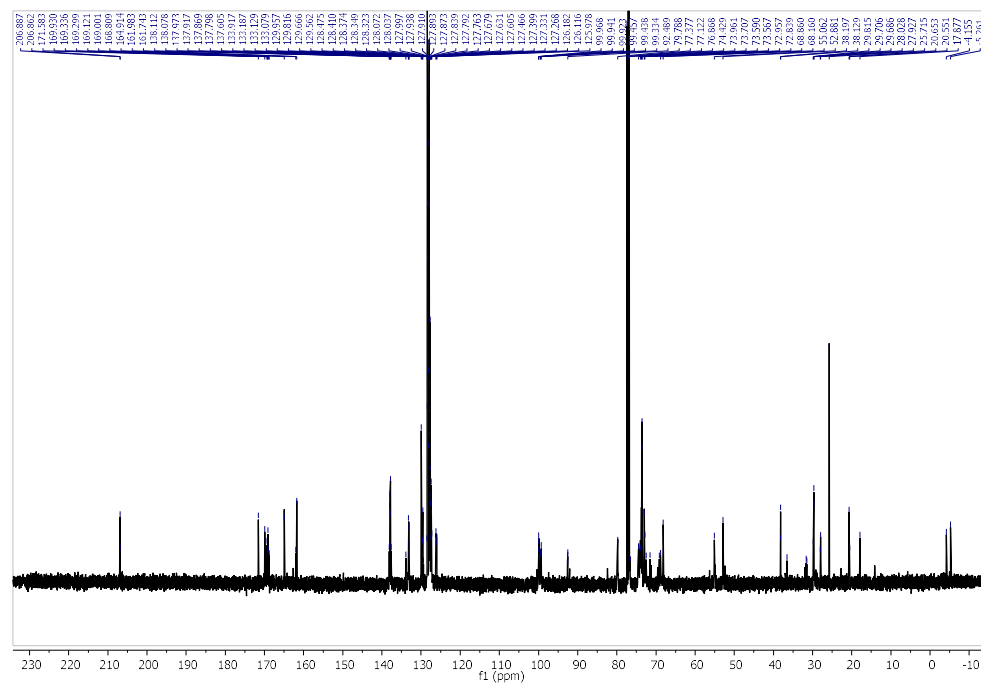



gCOSY (CDCl<sub>3</sub>, 500 MHz) of **44**

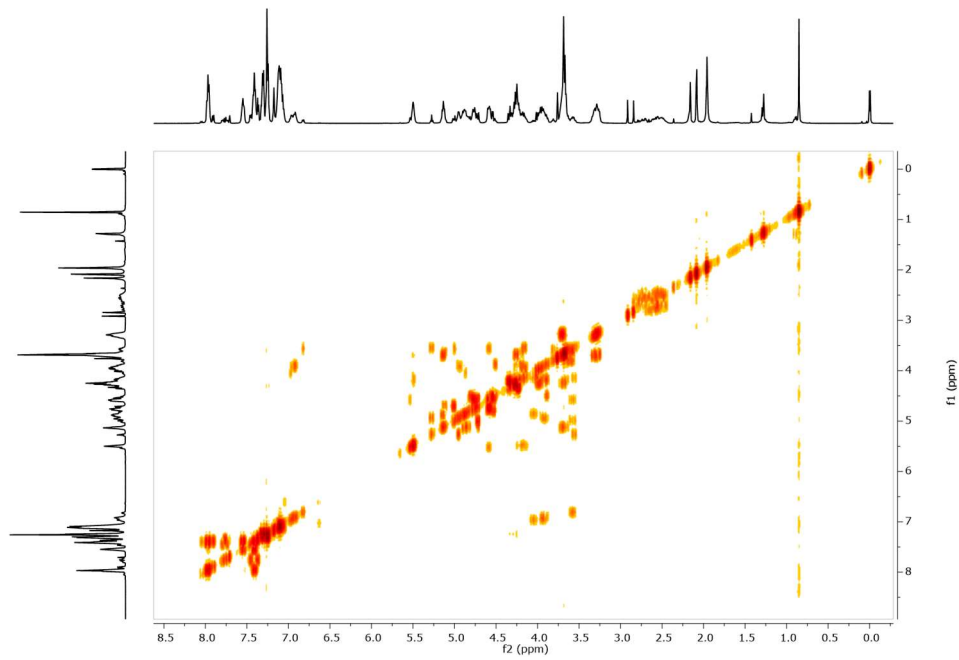

gHSQC (CDCl<sub>3</sub>, 500 MHz) of **44**

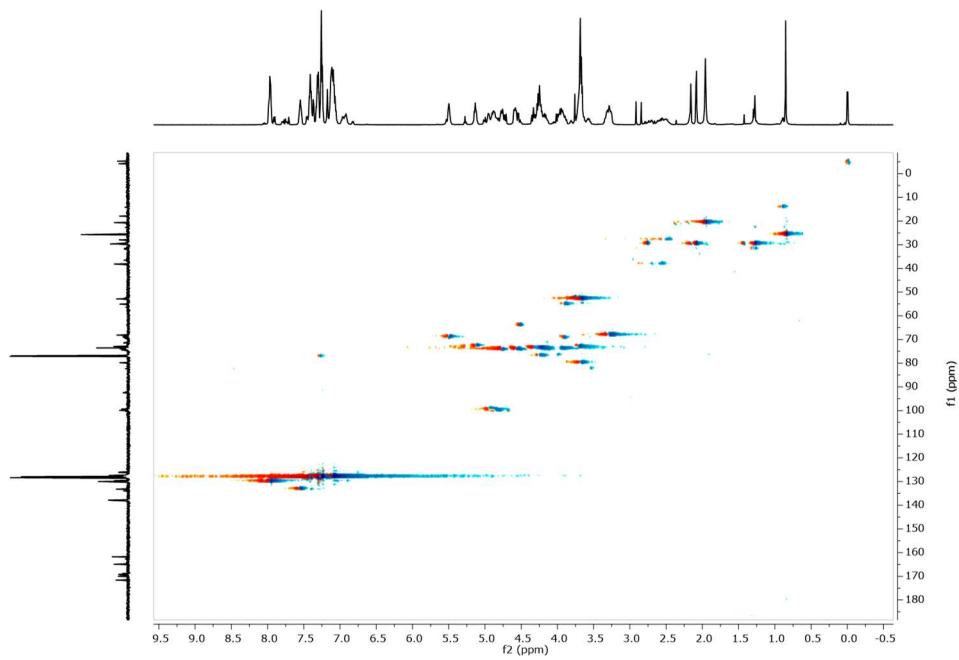

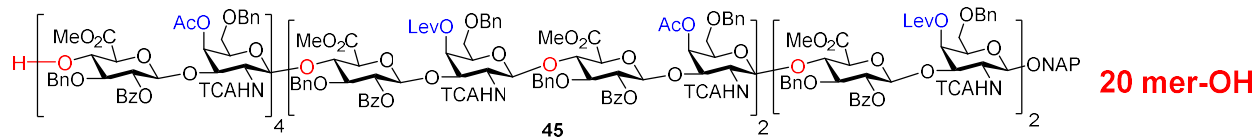

<sup>1</sup>H-NMR (CDCl<sub>3</sub>, 500 MHz) of **45**

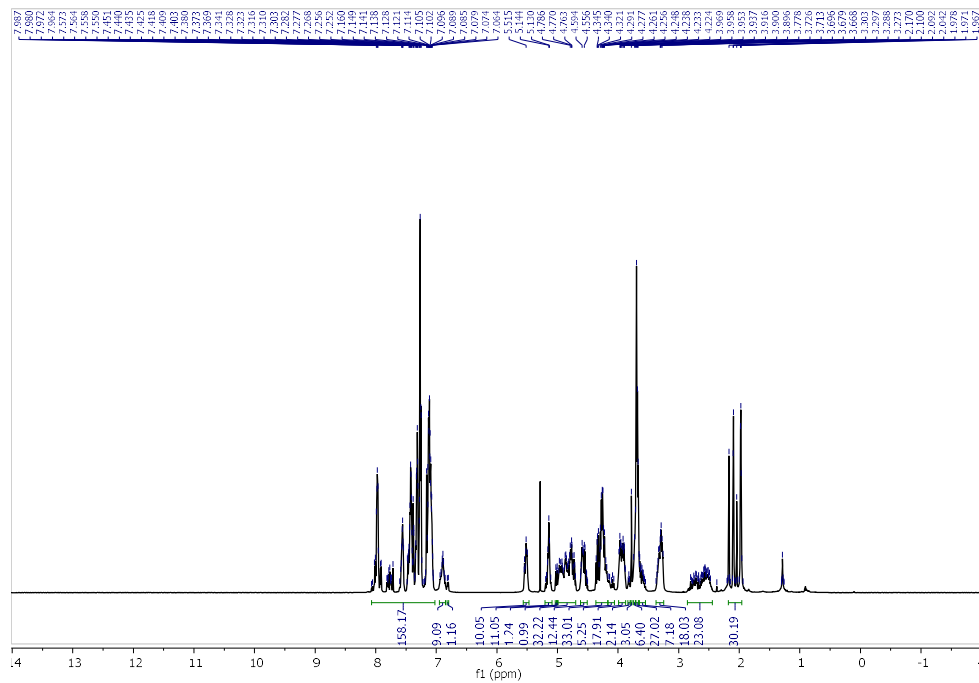

<sup>13</sup>C-NMR (CDCl<sub>3</sub>, 126 MHz) of **45**

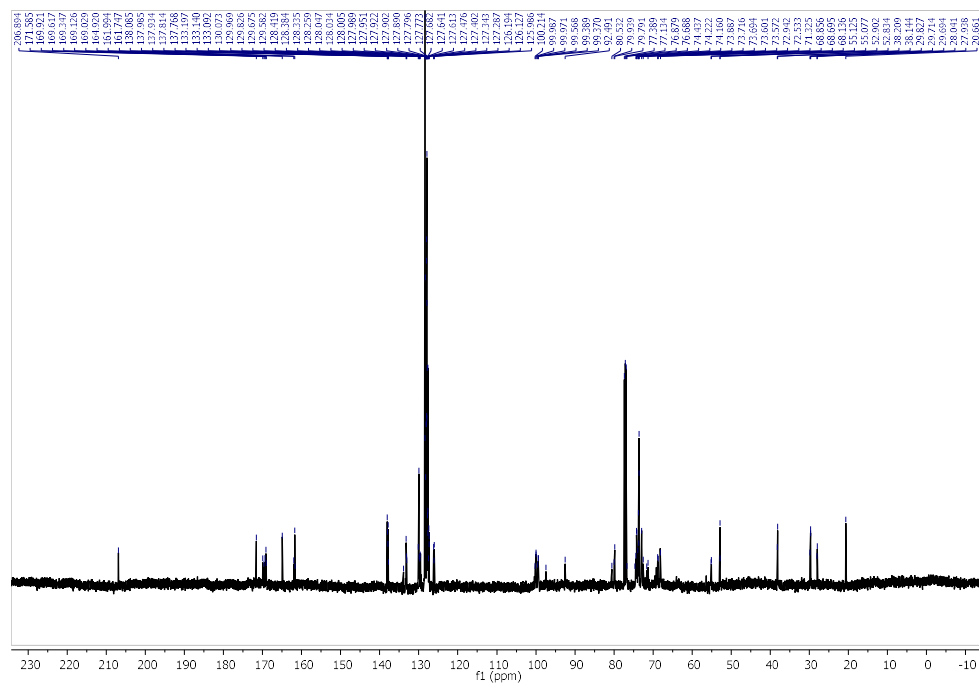

gCOSY (CDCl<sub>3</sub>, 500 MHz) of **45**

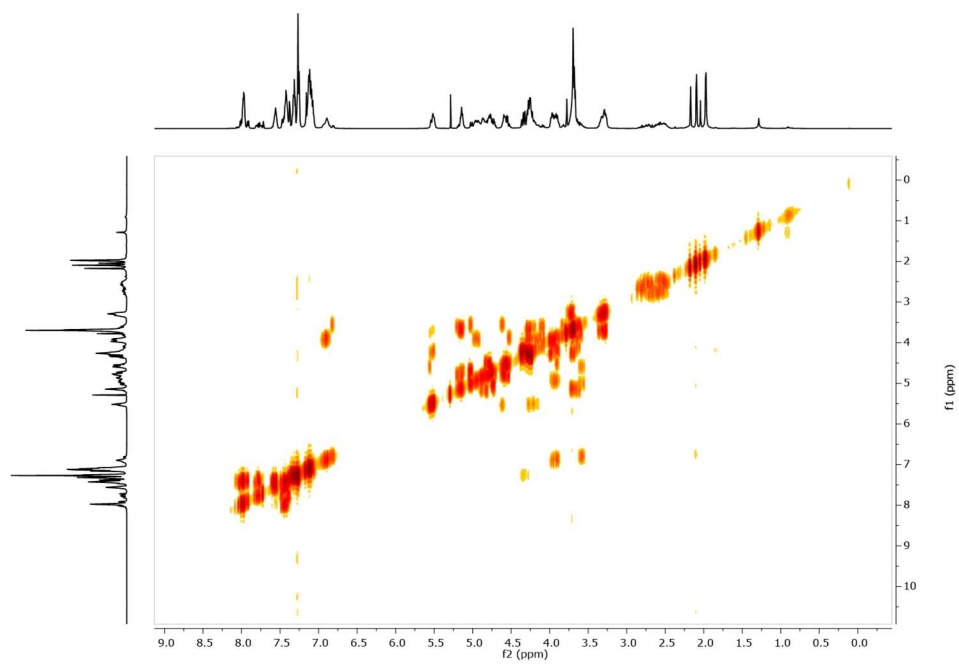

gHSQC (CDCl<sub>3</sub>, 500 MHz) of **45**

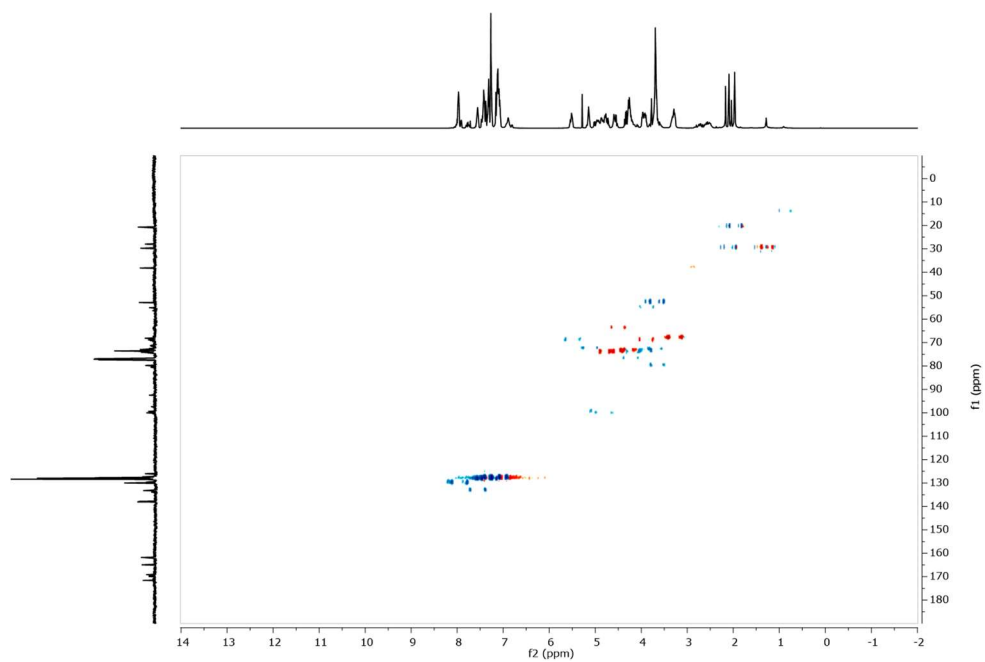

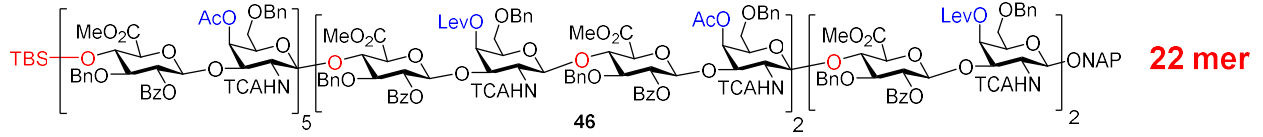

<sup>1</sup>H-NMR (CDCl<sub>3</sub>, 500 MHz) of 46

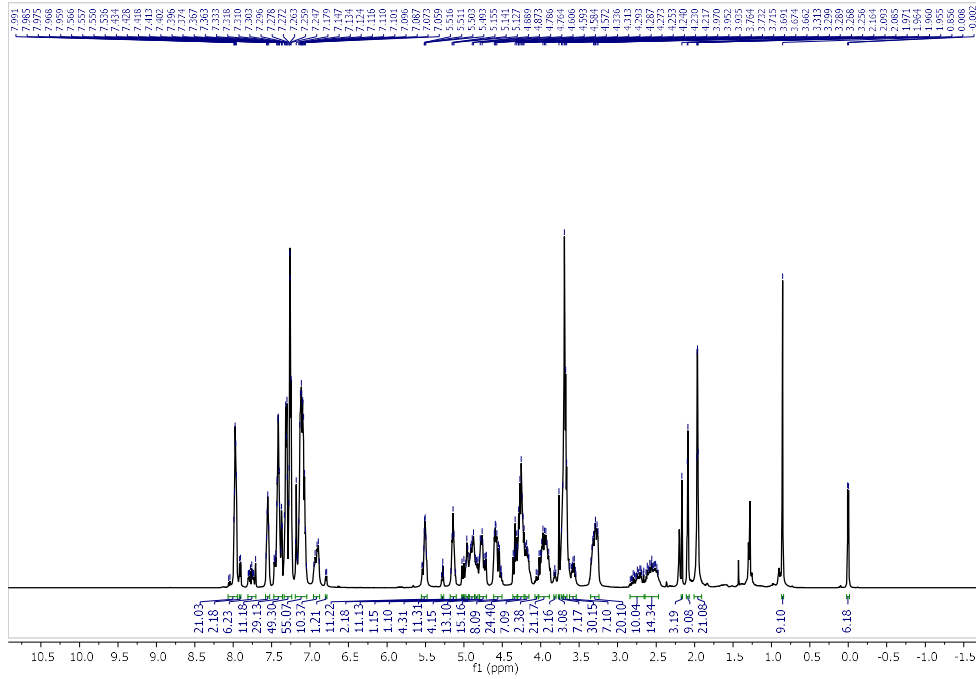

gCOSY (CDCl<sub>3</sub>, 500 MHz) of **46**

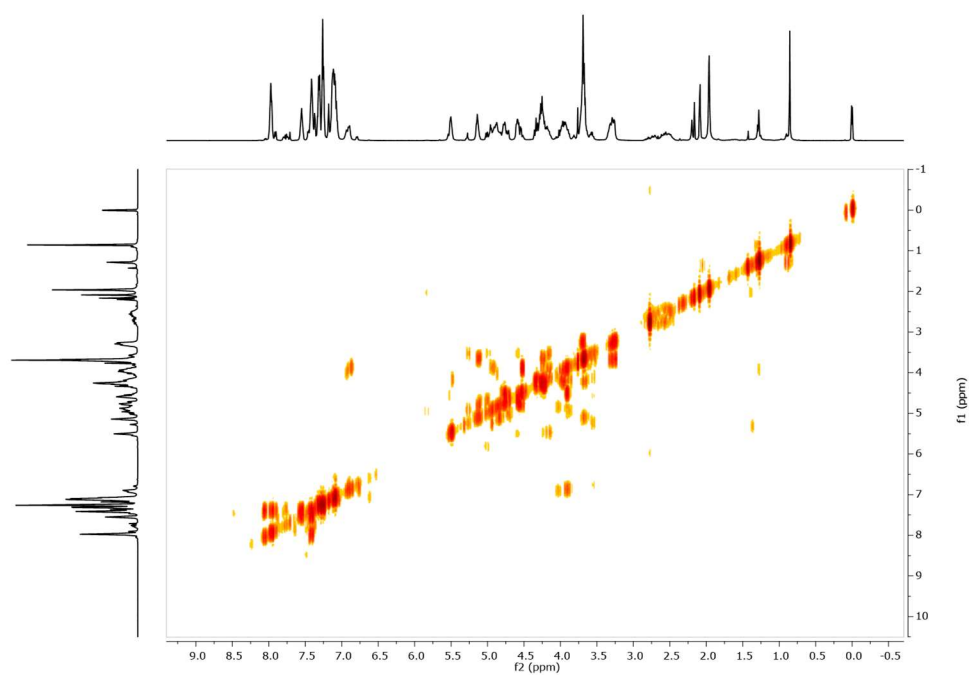



gCOSY (CDCl<sub>3</sub>, 500 MHz) of 47

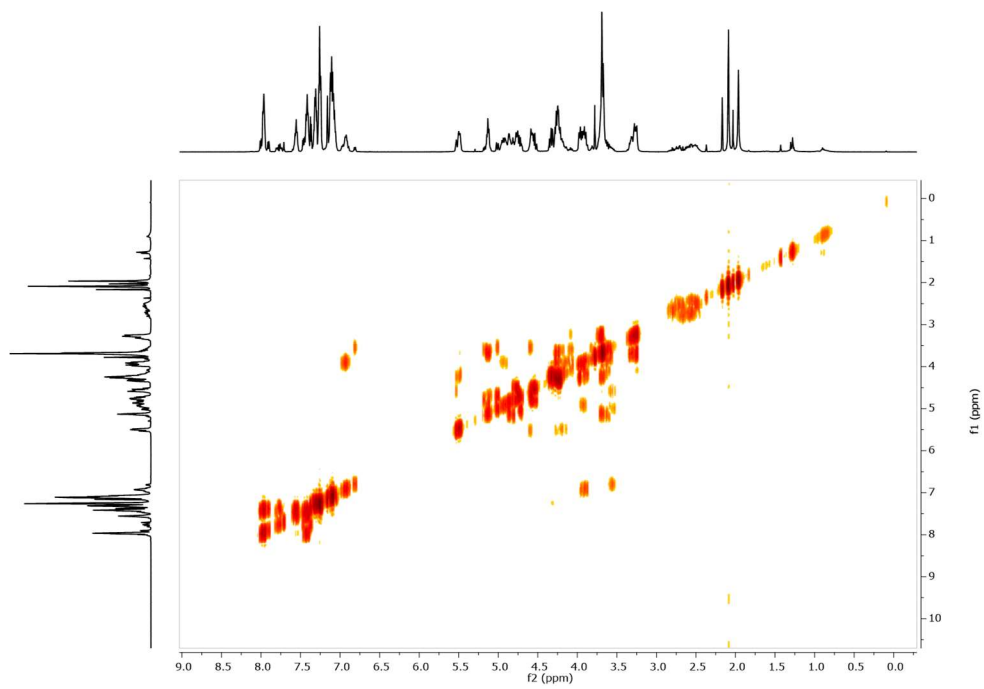

gHSQC (CDCl<sub>3</sub>, 500 MHz) of 47

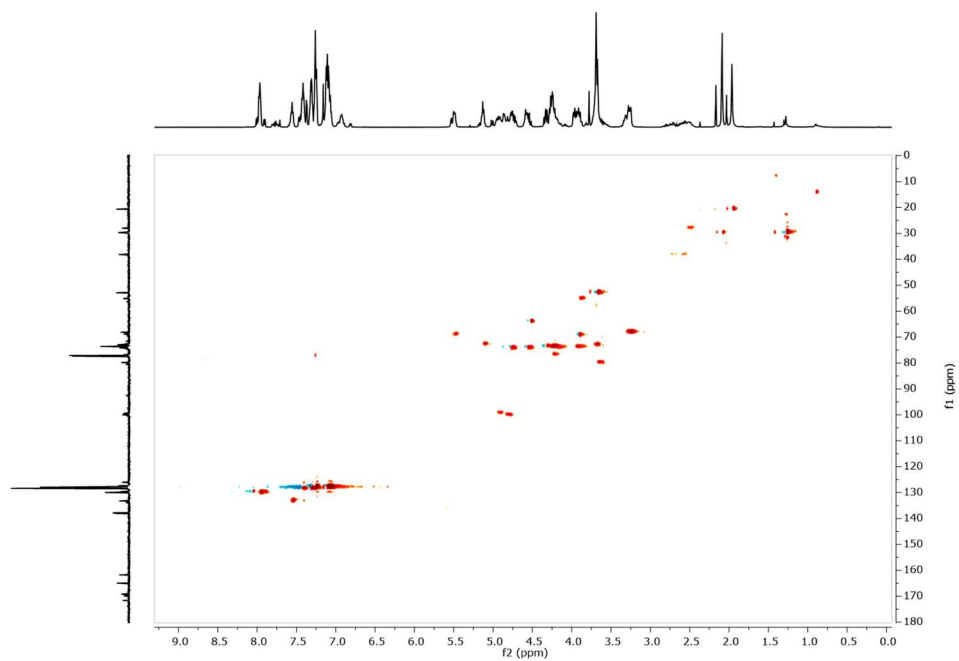





gCOSY (CDCl<sub>3</sub>, 500 MHz) of **48**

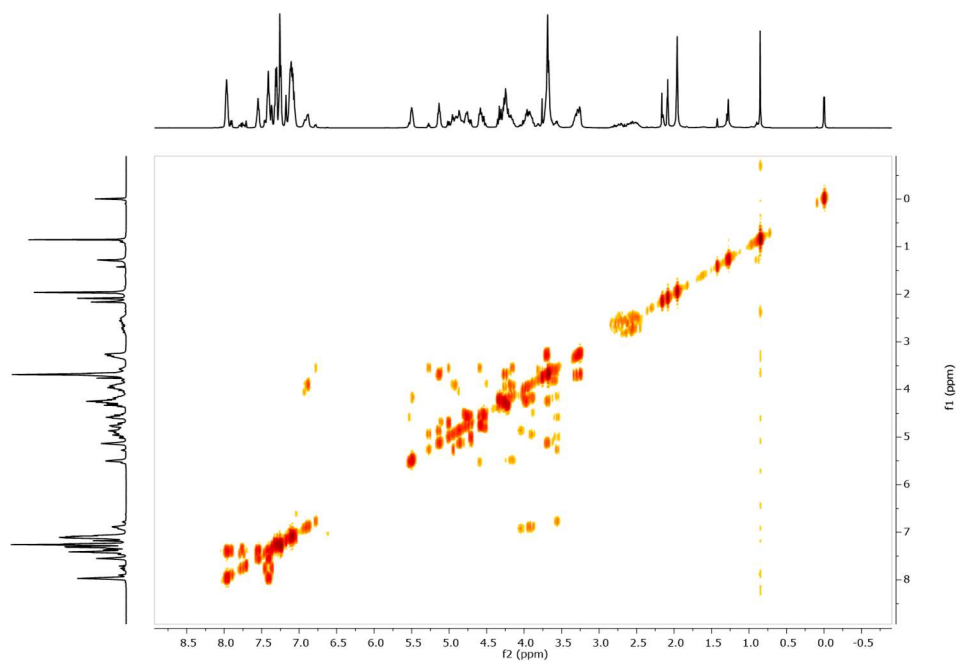

gHSQC (CDCl<sub>3</sub>, 500 MHz) of **48**

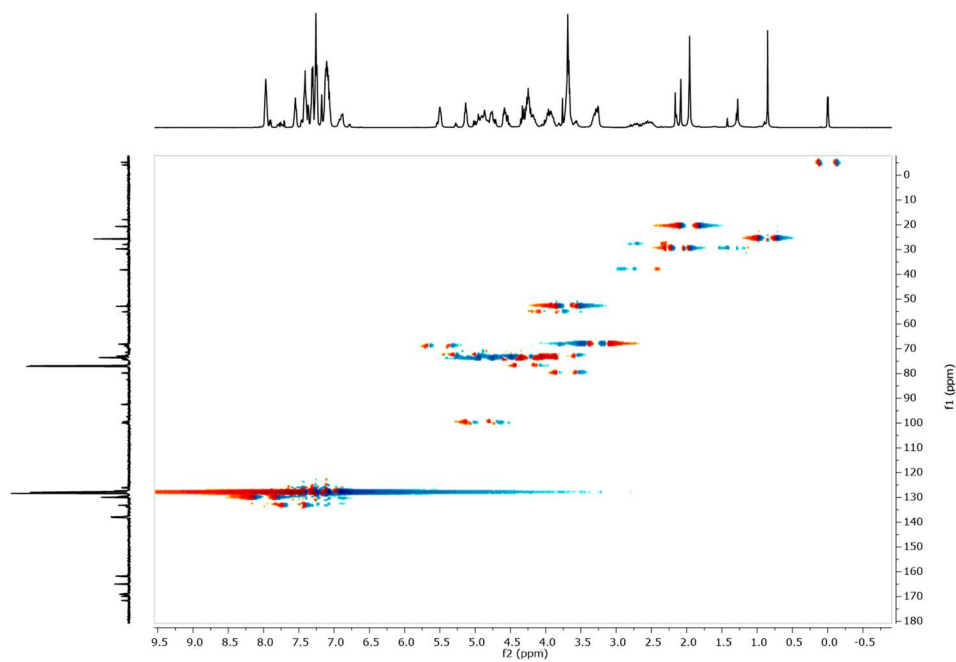



gCOSY (CDCl<sub>3</sub>, 500 MHz) of **49**

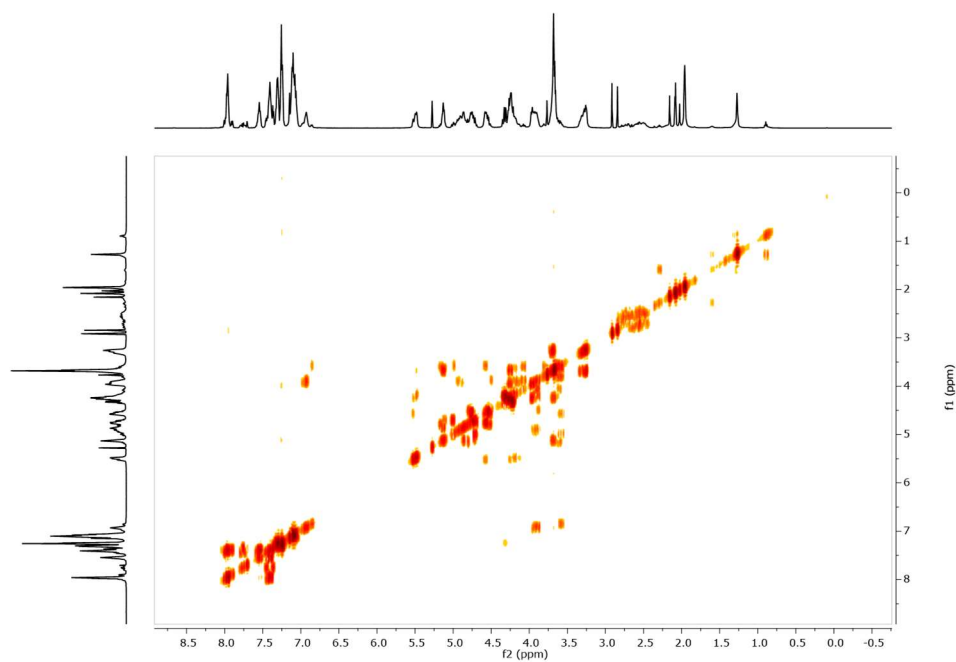

gHSQC (CDCl<sub>3</sub>, 500 MHz) of **49**

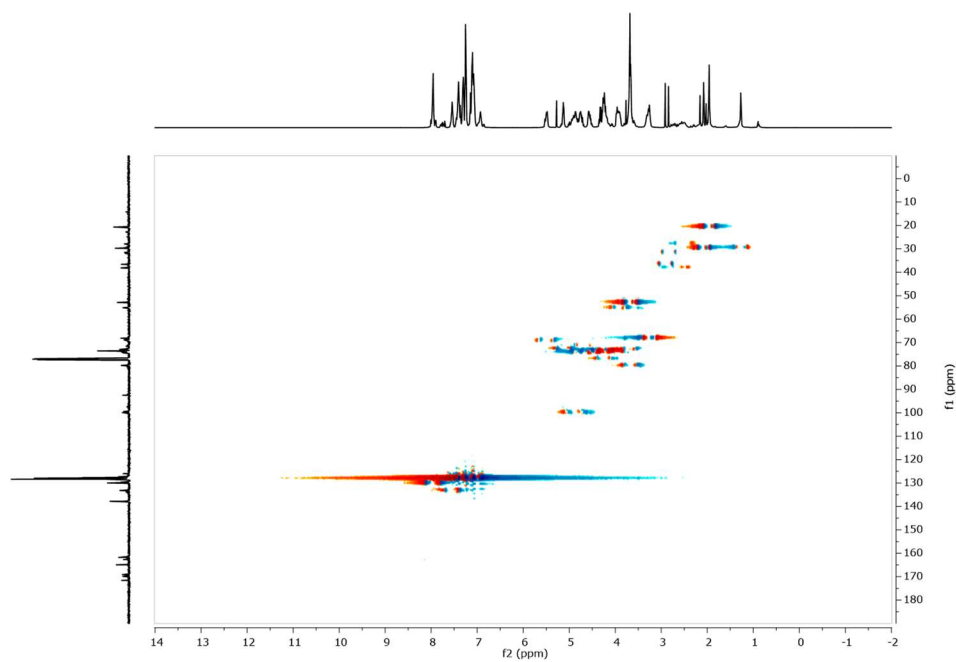



gCOSY (CDCl<sub>3</sub>, 500 MHz) of **50**

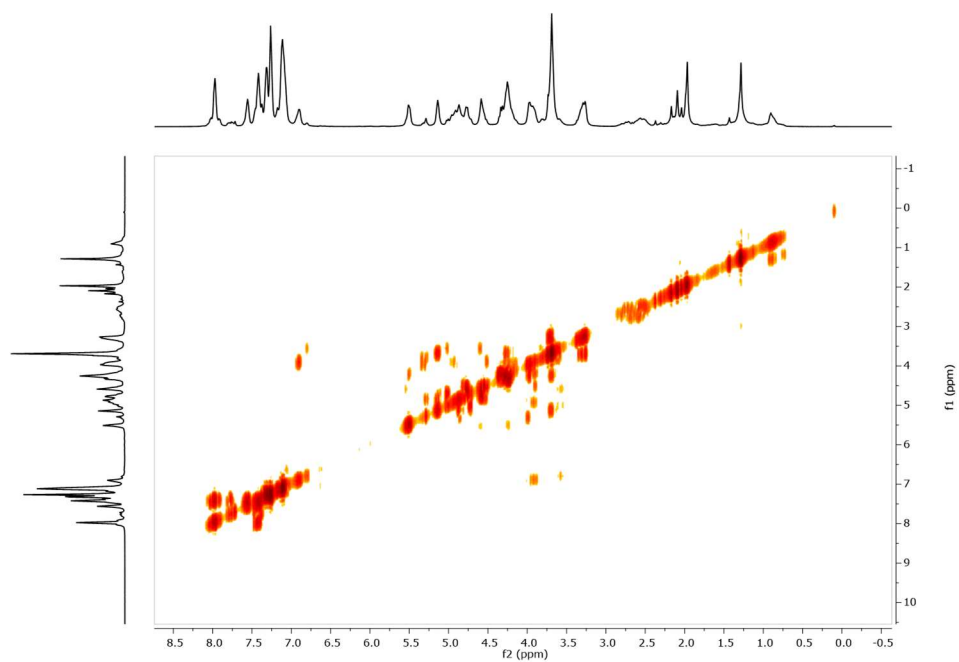

gHSQC (CDCl<sub>3</sub>, 500 MHz) of **50**

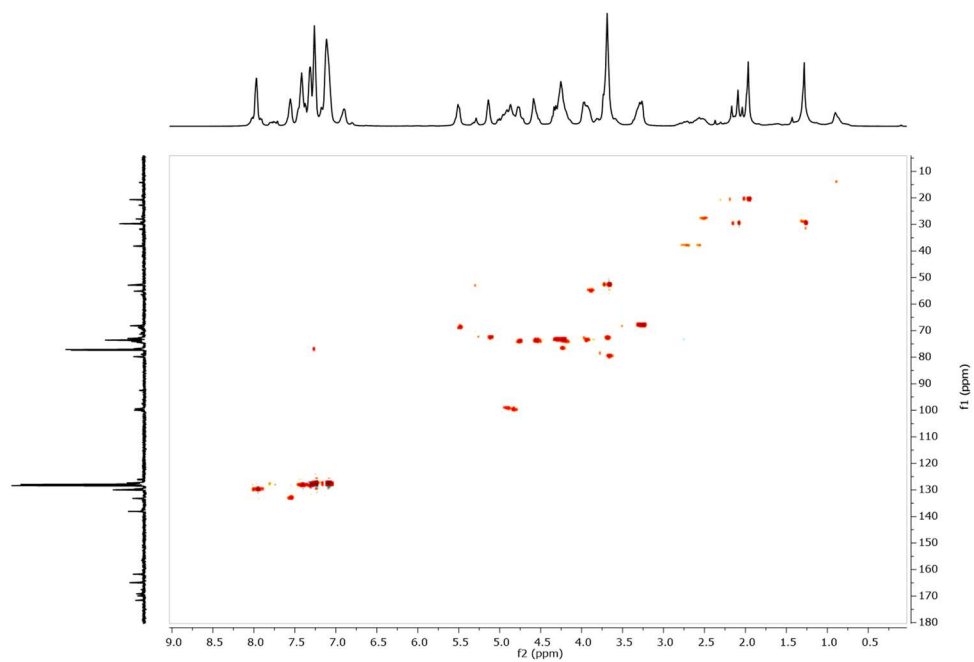

MALDI-TOF. of 50

<Untitled> 13 Aug 2018 17:24 Cal: 9 Jul 2007 10:16  
dzu Biotech Axima CFR 2.9.3.20110624: Mode Linear, Power: 69, Blanked, P.Ext. @ 4244 (bin 79)  
it. 13 mV[sum= 526 mV] Profiles 1-41 Smooth Av 50 -Baseline 150

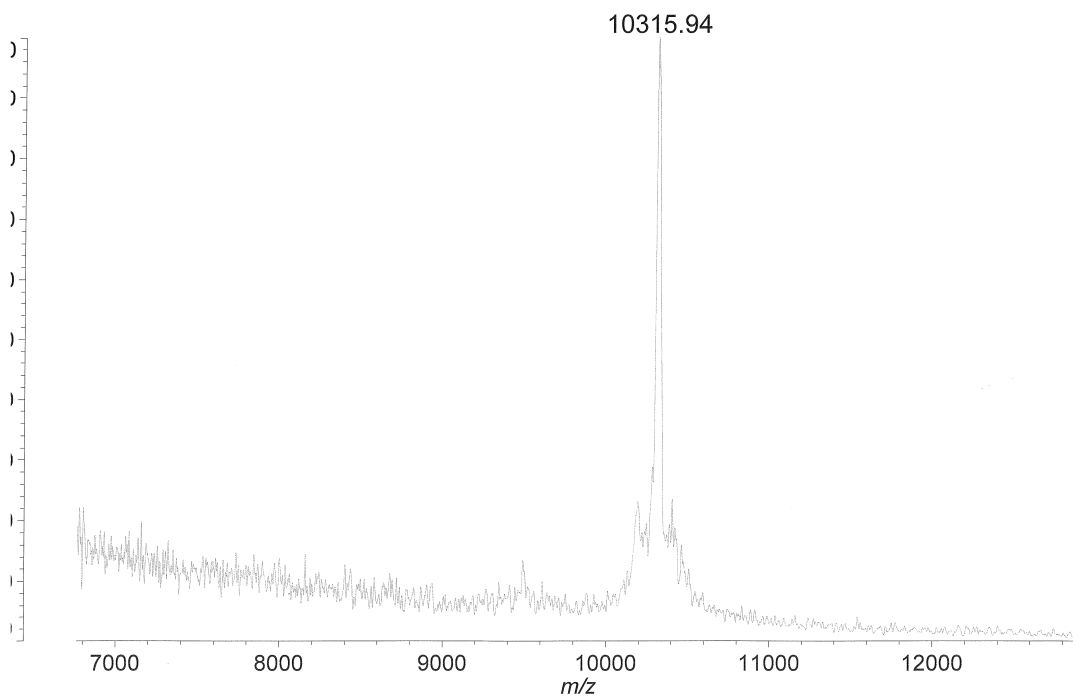



gCOSY (CDCl<sub>3</sub>, 500 MHz) of **51**

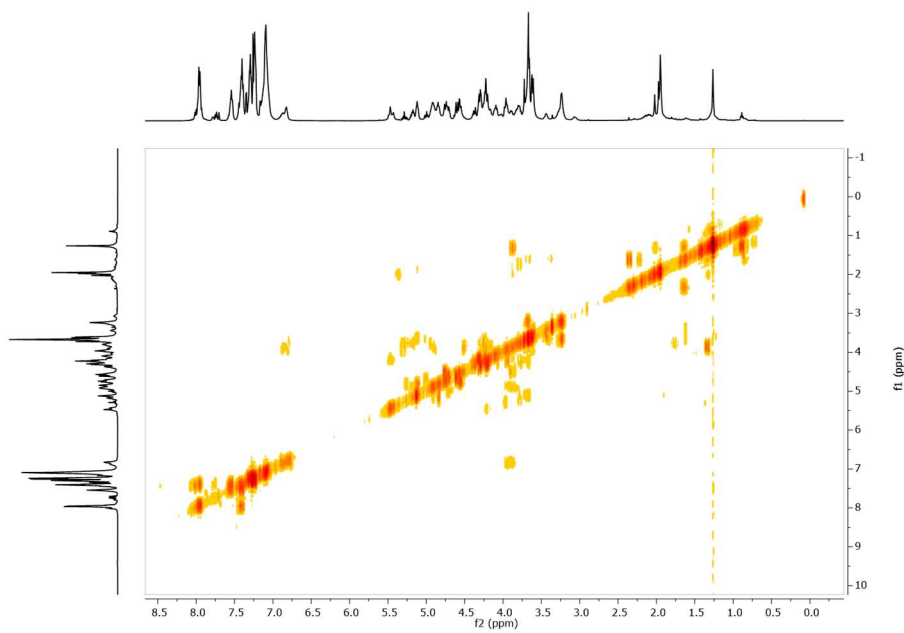

gHSQC (CDCl<sub>3</sub>, 500 MHz) of **51**

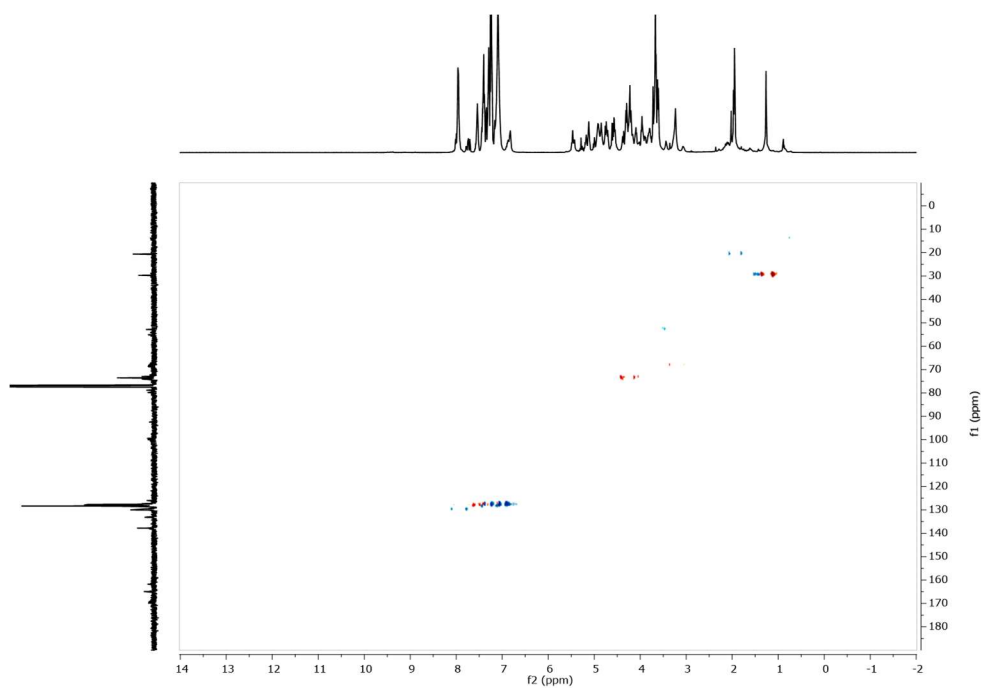





gCOSY (CDCl<sub>3</sub>, 500 MHz) of **52**

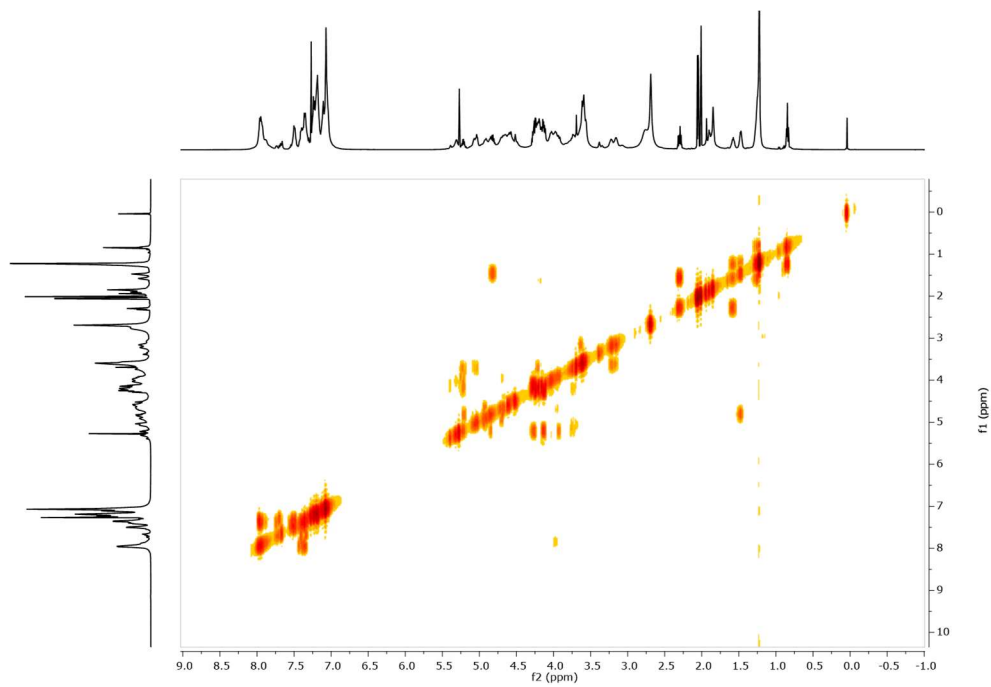

# ESI-MS of 52

24 Sulfation more reagent 24 h 1  
XS2\_081518\_16 21 (0.197)

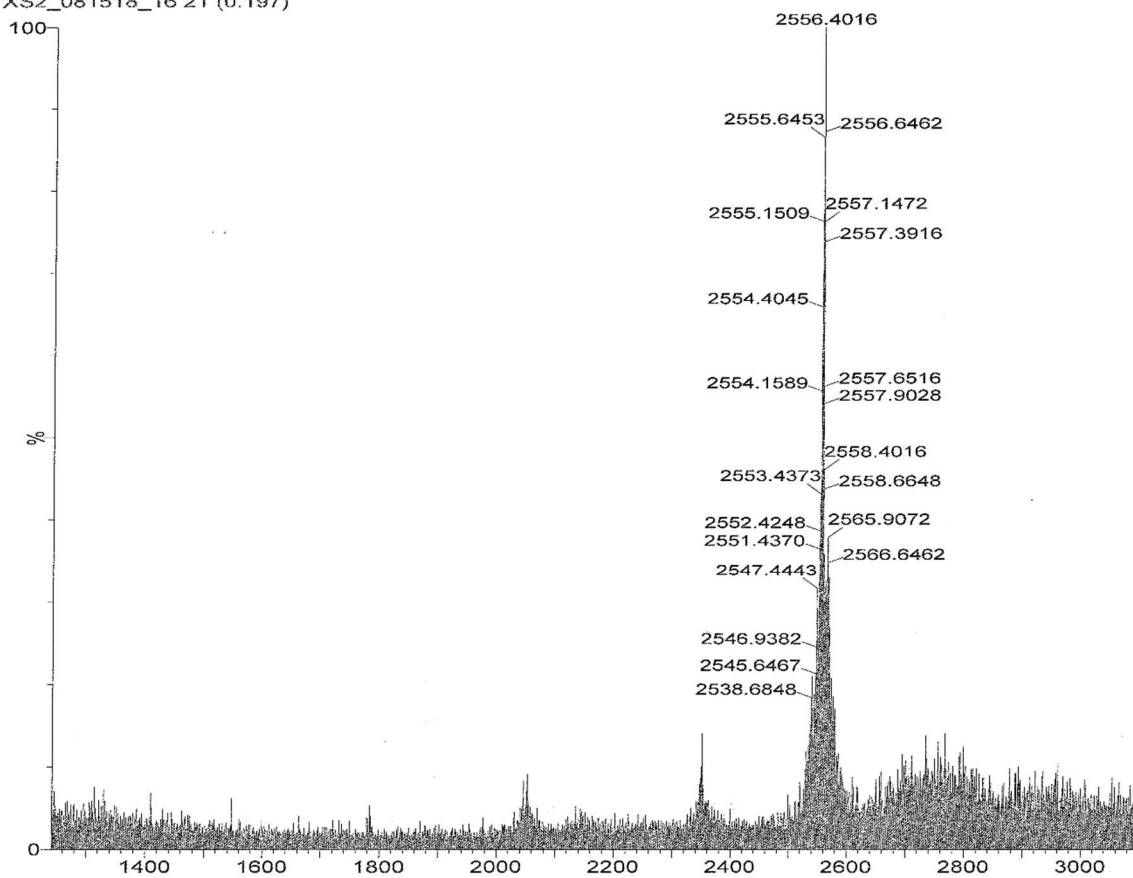

# ESI-MS of hydrolysis and TCA removal of 52

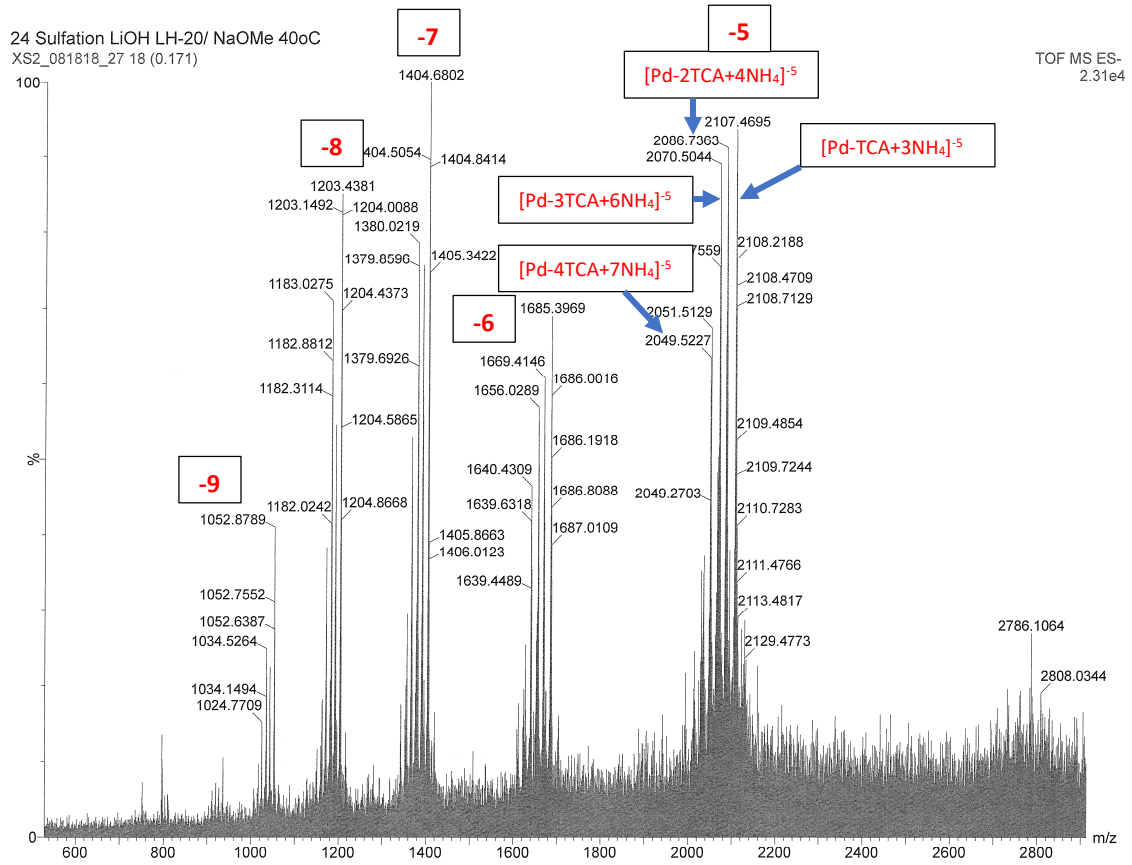

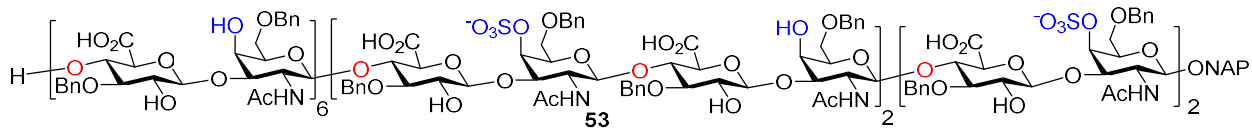

ESI-MS. of **53**

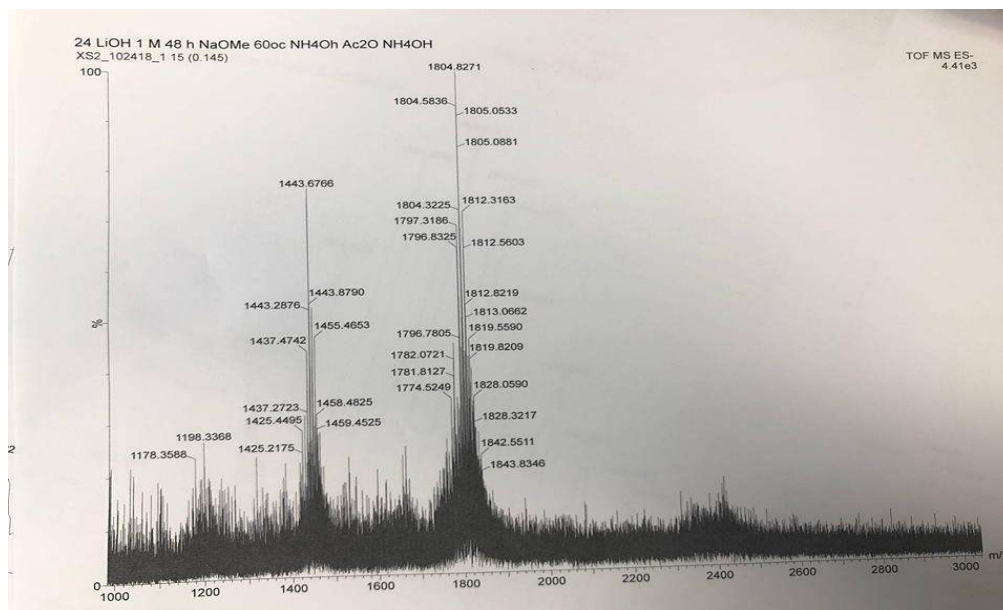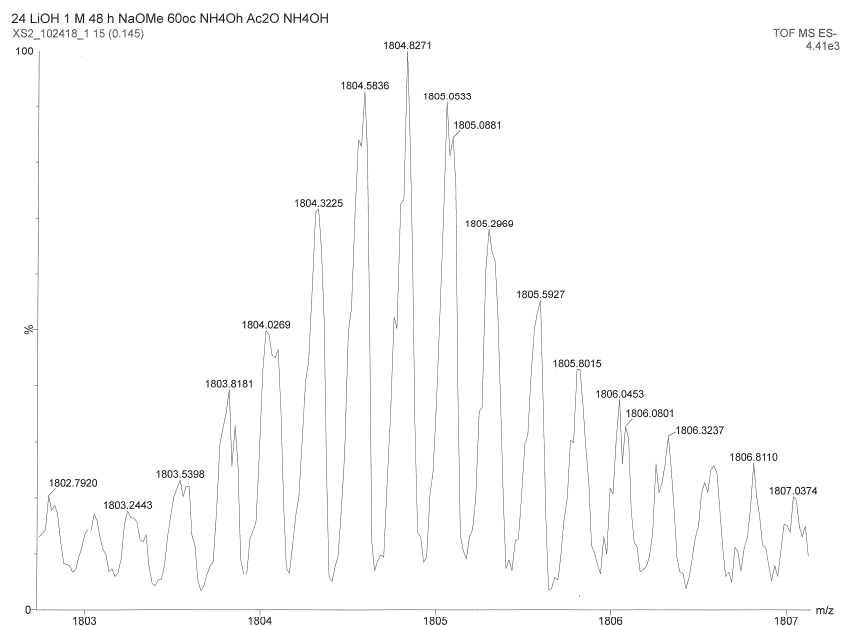

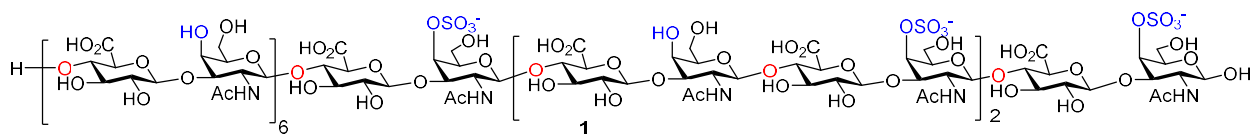

<sup>1</sup>H-NMR (D<sub>2</sub>O, 500 MHz) of **1**

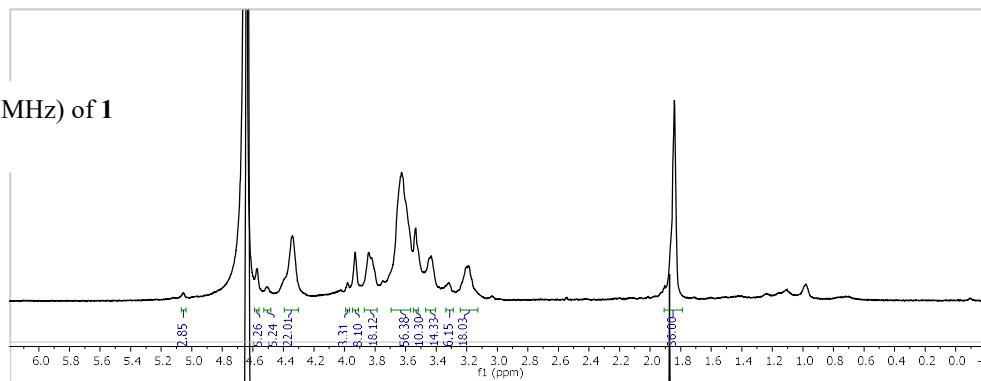

<sup>1</sup>H-NMR (D<sub>2</sub>O, 500 MHz) of CS-Polymer

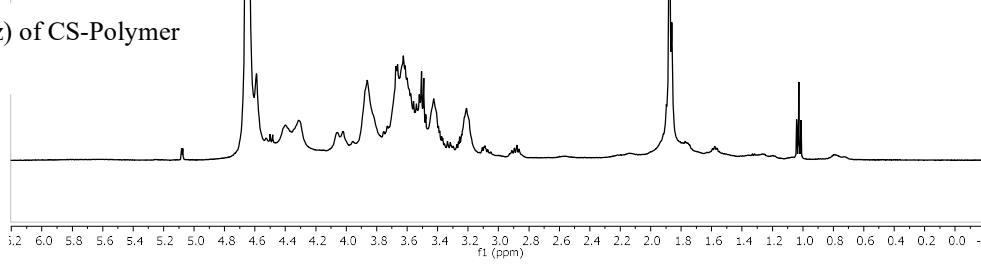

gHSQC (CDCl<sub>3</sub>, 500 MHz) of **1**

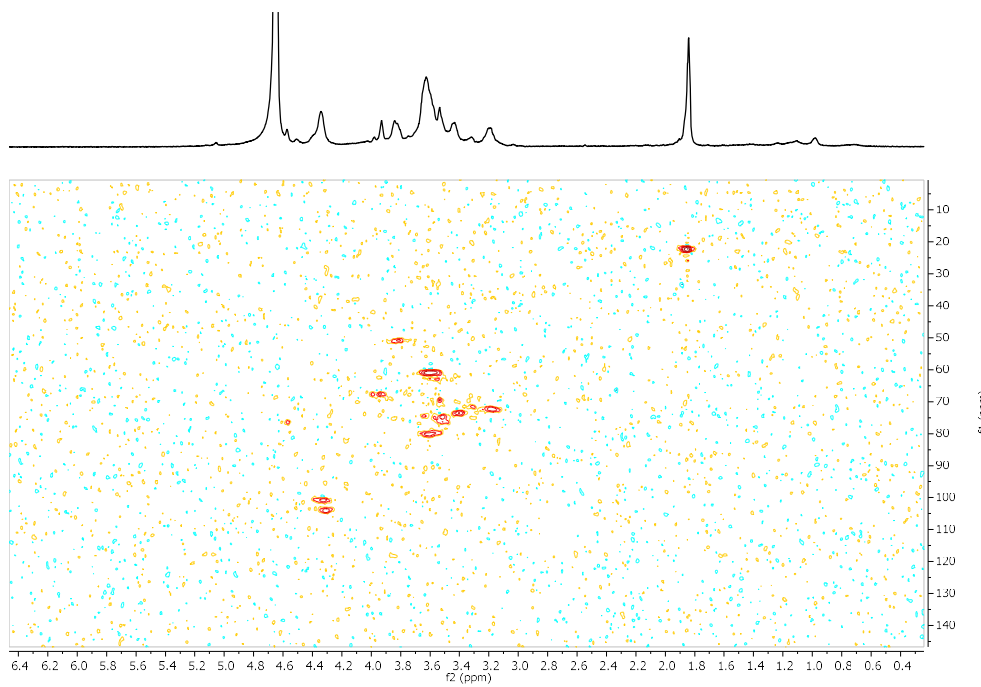

$^1\text{H-NMR}$  ( $\text{D}_2\text{O}$ , 500 MHz) of bikunin CS

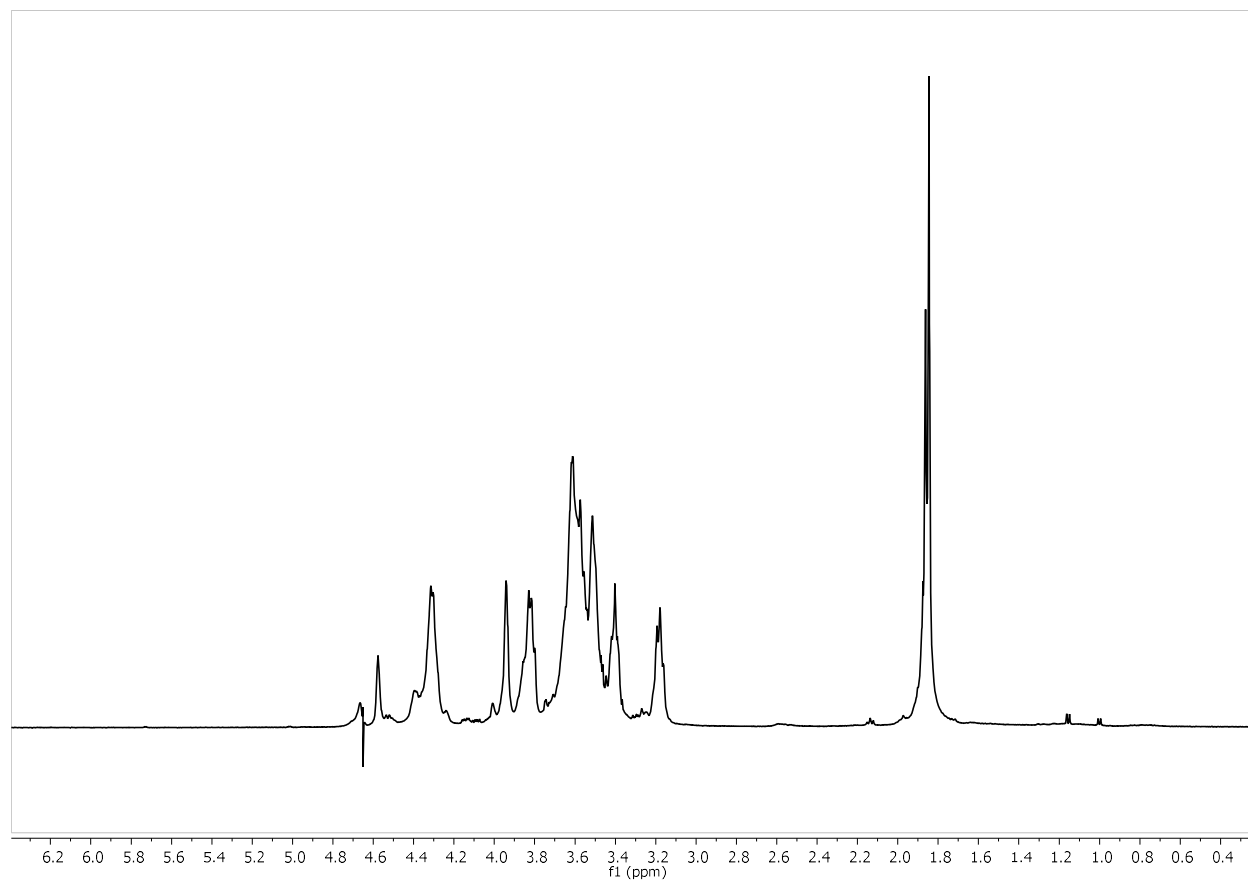

ESI-MS of bikunin CS

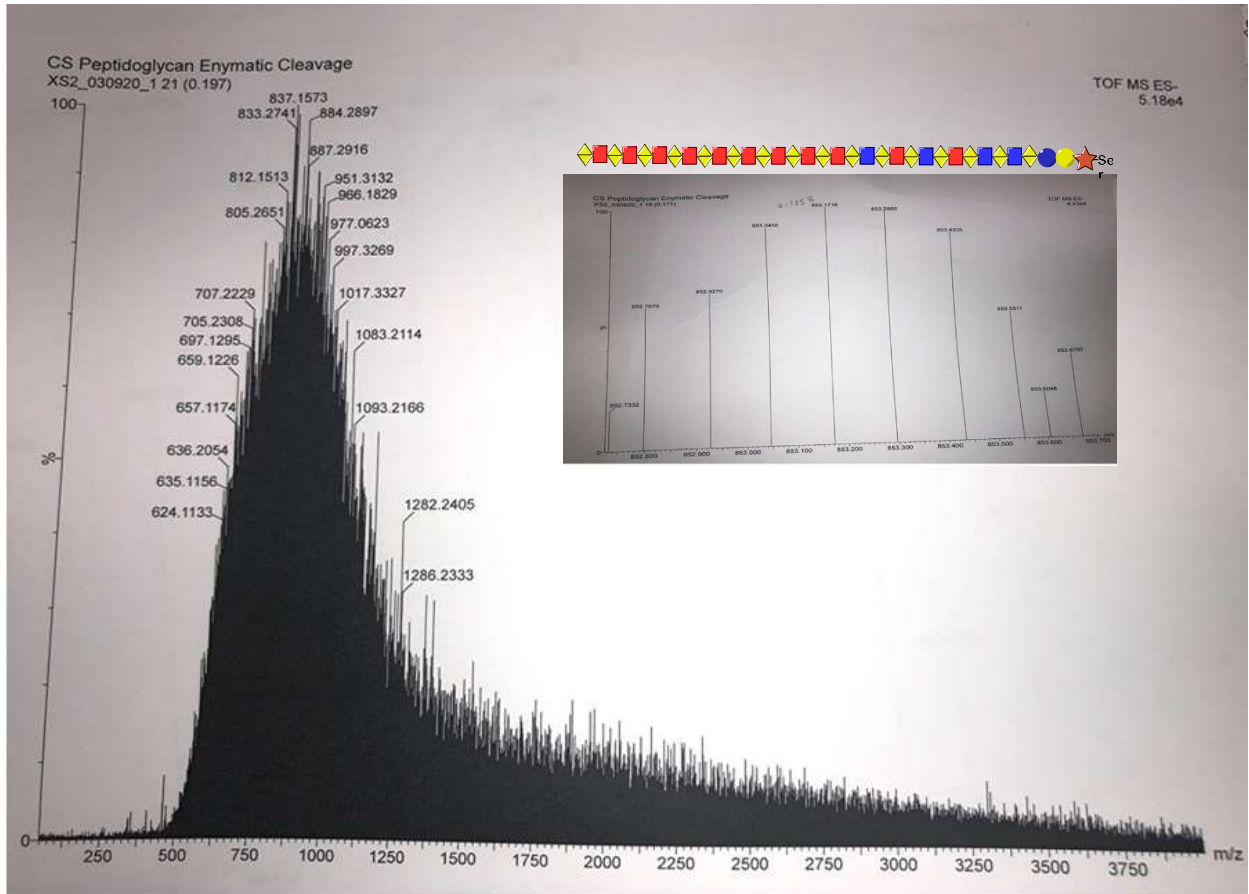

Supplement: oc9b01199_si_001.pdf [file oc9b01199_si_001.pdf]
